# Supplementary material for: The use of the so‐called ‘superchilling’ technique for the transport of fresh fishery products
Source: PubMed Central journal article supplement (PMC7842081; doi:10.2903/j.efsa.2021.6378), 2021-01-28
Supplement: EFS2-19-e06378-s001.pdf [file EFS2-19-e06378-s001.pdf]

# Superchilling Fish Products

Nile perch (*Lates niloticus*) fillet



## Participating companies

### Italy

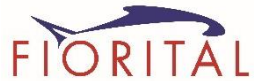

Fiorital S.p.A.  
Loc. Marittima - Fabbricato 114  
30135 – Venezia

### The Netherlands

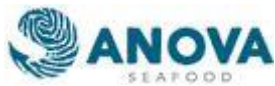

ANOVA Seafood  
Hambakenwetering 3  
5231 DD 's Hertogenbosch

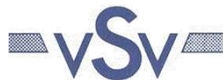

V.S.V. Van Slooten Vis IJmuiden B.V.  
Vissershavenstraat 35  
1976 DB IJmuiden

### **Coordinated by:**

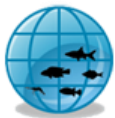

Dutch Fish Importers Association  
Louis Braillelaan 80  
2719 EK Zoetermeer  
The Netherlands

**This document is exclusively meant to be used by DG SANTE**

Contents

- Summary ..... 6
- 1. Introduction..... 7
- 2. Method..... 8
  - 2.1. General ..... 8
  - 2.2. Validated research by independent party..... 8
  - 2.3. Company induced self-monitoring program ..... 9
- 3. Results ..... 11
  - 3.1. Validated research by independent party..... 11
    - 3.1.1. General information ..... 11
    - 3.1.2. Superchilling process ..... 11
    - 3.1.3. Transport ..... 13
    - 3.1.4. Microbiological analyses ..... 14
    - 3.1.5. Enzyme determination of HADH ..... 16
  - 3.2. Company self-monitoring program ..... 18
    - 3.2.1. General information ..... 18
    - 3.2.2. Superchilling process..... 18
    - 3.2.3. Transport ..... 21
- 4. Conclusions..... 23
- 5. References..... 24
- Annex I Validated research by independent party..... 25
  - A1.1 Superchilling information at origin..... 25
    - Supreme Perch Ltd. .... 27
    - Fresh Perch Ltd. .... 30
    - East African Sea Food Ltd. .... 33
    - Karmic Foods Ltd. .... 38
  - A1.2 Destination temperature and HADH results RIKILT Wageningen University ..... 44
  - A1.3 Microbiological analysis Mérieux NutriSciences ..... 56
  - A1.4 Data loggers..... 64
    - Supreme Perch Ltd. .... 64
    - Fresh Perch Ltd. .... 65
    - Karmic Foods Ltd. .... 66
    - East African Sea Food Ltd. .... 67
- Annex II Company self-monitoring program ..... 68
  - A2.1 Superchilling information at origin..... 68
  - A2.2 Data loggers..... 91

|                                                       |    |
|-------------------------------------------------------|----|
| Fresh Perch Ltd. ....                                 | 91 |
| Nile Perch Fisheries Ltd. ....                        | 92 |
| Lake Eco Fish Processing Ltd. ....                    | 93 |
| Supreme Perch Ltd. ....                               | 94 |
| Victoria Perch Ltd. ....                              | 95 |
| A2.3 Arrival temperatures Europe establishments ..... | 96 |

## Summary

Superchilling is a common preservation technique in the fresh fish, poultry and meat industry. This technique is used to reduce the temperature of the product to the point of initial freezing; low enough to substantially reduce bacterial activity but high enough to avoid significant levels of ice crystal growth that can cause structural damage. In the Nile Perch industry this preservation technique has been used for many decades. Fresh Nile perch fillets are superchilled before exporting them from the Lake Victoria region to the EU and other overseas destinations.

This report will give more insight in the superchilling technique used in the Nile perch value chain and will provide an objective standard to determine whether superchilled fish products have (previously) been frozen.

Validated research and a company induced self-monitoring plan, which used almost 1,000 Nile perch samples, showed that superchilling results in fresh Nile perch fillets to be chilled to average temperatures of  $-0.7$  to  $-1.6$  °C within 30 to 52 minutes. Due to temperature management the cold chain is maintained and microbiological values of superchilled Nile perch fillets are kept well below the maximum limits.

In this research a HADH enzymatic test was carried out by an European Referential Laboratory to measure the mitochondrial enzyme HADH in the Nile perch fillets. HADH will be released after cell damage which is a result of the formation of ice crystals in the product. Therefore HADH acts as an indicator which shows whether Nile perch fillets have previously been deep frozen. The HADH enzymatic test in this research shows that Nile perch fillets that underwent a superchilling treatment did not come from sources of deep frozen Nile perch.

## 1. Introduction

For many years fresh Nile perch fillets from lake Victoria are imported into the EU while maintaining the cold chain by using the superchilling technique. In the FAO-SIFAR note (J.J. Waterman *et al.*, 2001) superchilling is defined as a technique that reduces the temperature of fish uniformly to a point slightly below that which is obtained in melting ice. It should be noted that seawater freezes at about -2°C or -3°C, depending on salinity, and that Regulation 852/2004 does allow ice to be made of seawater, so the temperature of melting ice should encompass sub-zero temperatures to at least -3°C. This technique is used to reduce the temperature of the product to the point of initial freezing; low enough to substantially reduce bacterial activity but high enough to avoid significant levels of ice crystal growth that can cause structural damage. Besides suppressing harmful microbes superchilling maintains food freshness and preserves nutritional quality (Banerjee *et al.*, 2017; Shavel *et al.*, 2015; Kaale *et al.*, 2011; Chun-hua *et al.*, 2014). Superchilling is a well-known technique in the fresh fish and meat industry and is described for species like salmon, cod, squid, poultry, prawns and pork (Massaquoi *et al.*, 2011; Duun *et al.*, 2008; Duun *et al.*, 2008; Jones, 2015; Thordarson *et al.*, 2017). Superchilling is also used as a preservation technique for fresh Nile Perch products from the East-African region.

The *aim* of this research is to give more insights in the superchilling technique used in the Nile perch value chain. This research will describe how the cold chain for superchilled Nile perch works and what impact it has on quality and food safety of the fresh fish product. Secondly, this research will provide an objective standard to determine if fish products have been (previously) frozen to clarify that raw material of fresh fish are superchilled and no deep frozen Nile perch is used.

The methods used while performing this research are described in chapter 2. The results are depicted in chapter 3 and discussed in chapter 4.

## 2. Method

### 2.1. General

The results described in this report originate from two types of research:

- Validated research by an independent party;
- Company induced self-monitoring program.

In both types of research data from superchilled Nile perch from Uganda, Tanzania and Kenya were gathered. During the validated research by an independent party (30 May 2018 to 5 June 2018) data from the most important stages between processing and arrival of the product at destination were verified by an independent organisation (e.g. the competent authority of the third country, independent quality bureaus and certified laboratories). The advantage of involving a scientific third party is that the outcomes are validated and independent. During the company induced self-monitoring program (December 2017 to March 2018) extra information was gathered from different stages in the superchilling process without a validation of an independent third party. The advantage of a company induced self-monitoring program however, is that it generates an increased amount of information of different stages in the superchilling process in a less costly manner. , Below more information about the research steps are given.

### 2.2. Validated research by independent party

Nile perch are caught in Lake Victoria and processed in the surrounding countries Uganda, Tanzania and Kenya. Superchilled Nile Perch filets from different suppliers of these countries were used for this research. Suppliers are mentioned in table 2.1

*Table 2.1: Nile Perch suppliers for validated research*

| <b>Company code</b> | <b>Company name</b>       | <b>Country</b>   |
|---------------------|---------------------------|------------------|
| <b>EAS</b>          | East Africa Sea Food Ltd. | Nairobi, Kenya   |
| <b>SUP</b>          | Supreme Perch Ltd.        | Bukoba, Tanzania |
| <b>FRE</b>          | Fresh Perch Ltd.          | Entebbe, Uganda  |
| <b>KAR</b>          | Karmic Foods Ltd.         | Kampala, Uganda  |

From each of above mentioned suppliers six samples were taken for research. The following information was gathered:

- General information:
  - Date of sampling
  - Presentation form of sample
  - Supplier information
- Information about the superchilling process:
  - Core fillet temperature at start of the treatment
  - Core fillet temperature at the end of the treatment
  - Duration superchilling technique
  - Type of freezer
  - Name of independent controller
- Information about the cold chain during transport:
  - Datalogger information during transport
  - Temperature at destination



- Name of independent controller at destination
- Microbiological information random fillets at destination:
  - Done by an ISO:17025 laboratory, tested on:
    - Total Plate Count (conform ISO 4833-1)
    - Enterobacteriaceae (conform ISO 21528-2)
    - Salmonella (equivalent to ISO 6579 (GEN 25/05-11/08))
    - E.coli (conform ISO 16649-2)
    - Listeria monocytogenes (equivalent to ISO 11290-2 (AES 10/05-09/06))
- Research of random samples by an EU reference Laboratory to differentiate frozen from unfrozen fish, using:
  - Enzyme determination of HADH according to <https://link.springer.com/article/10.1007/s002170050481>

To differentiate frozen from unfrozen fish it is decided to look at enzyme determination of HADH instead of a histological test. With negative temperatures close to 0°C, some ice crystals could occur which possibly could create cell damage and therefore false positive results. The HADH test is a common enzymatic method that was initially developed to distinguish fresh from thawed meat is the β-hydroxyacyl-CoA-dehydrogenase method (HADH) (Gottesmann & Hamm, 1983; Hoz *et al.*, 1993) that takes advantage of the disruption of cell mitochondria induced by freezing and thawing of whole meat. The principle of this method is applicable and tested on several animal species among which fish. The spectrophotometric method measures the conversion rate of NADH to NAD<sup>+</sup> by monitoring the decrease in absorption at 340 nm as shown in the following reaction:

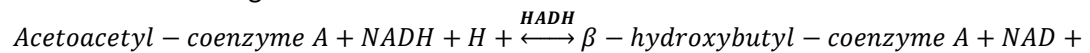

### 2.3. Company induced self-monitoring program

In the company induced self-monitoring program almost 1,000 samples were used to get more information about the superchilling process. Nine dataloggers were used to monitor the transport temperature of the Nile perch samples collected from suppliers mentioned in table 2.2.

Table 2.2: Nile Perch suppliers for company self-monitoring program

| Company code | Company name                  | Country  | # samples | Transport superchilling Process |
|--------------|-------------------------------|----------|-----------|---------------------------------|
| NPF          | Nile Perch Fisheries Ltd.     | Tanzania | 28        | 2                               |
| VPL          | Victoria Perch Ltd.           | Tanzania | 43        | 1                               |
| LBL          | Lake Bounty Ltd.              | Uganda   | 430       | 0                               |
| FPL          | Fresh Perch Ltd.              | Uganda   | 290       | 2                               |
| LEFP         | Lake Eco Fish Processing Ltd. | Uganda   | 177       | 2                               |
| SPL          | Supreme Perch Ltd.            | Tanzania | 0         | 2                               |

From each of the above mentioned suppliers the superchilling process was monitored. The following information was gathered:

- General information:
  - o Date of sampling
  - o Supplier information
- Information about the superchilling process:
  - o Core fillet temperature at start of the treatment
  - o Core fillet temperature at the end of the treatment
  - o Duration superchilling technique

Beside data about the superchilling process, transport temperature data was collected from five of above mentioned suppliers. Data loggers were placed directly inside the fish boxes. Some data loggers have been inserted on the fish before superchilling to also monitor this process.

- Information about the cold chain during transport:
  - o Datalogger information during transport
  - o Core fillet temperature at arrival at European establishment

### 3. Results

#### 3.1. Validated research by independent party

##### 3.1.1. General information

For the validated research the private sector collected information, validated by independent parties, about the superchilling process, cold chain during transport, product core temperature at destination at the Europe establishment, microbiology of the product at destination and product enzyme determination of HADH. In total:

- 24 samples of Nile perch fillets from the in table 2.1 mentioned companies were measured to get more insights of the superchilling process;
- 4 data loggers are used to get more insights of the cold chain during transport of the superchilled products;
- 4 boxes of Nile perch fillets were measured at arrival of the Europe establishment to get more insights into the temperature of the superchilled products at arrival.
- 4 samples of Nile perch fillets from four companies were measured on HADH to check if the superchilled products were frozen or unfrozen.

Information about the outcomes are described in the paragraphs 3.1.2, 3.1.3, 3.1.4, 3.1.5 and 3.1.6. More detailed information can be found in the annex I.

##### 3.1.2. Superchilling process

Figure 3.1.1 shows the core fillet temperatures at the start of the superchilling process for the in table 2.1 mentioned suppliers of superchilled Nile perch. In total 24 samples were taken. The average core temperature differ between 1.2 °C (Supreme Perch Ltd.) and 2.8 °C (East African Sea Food Ltd.).

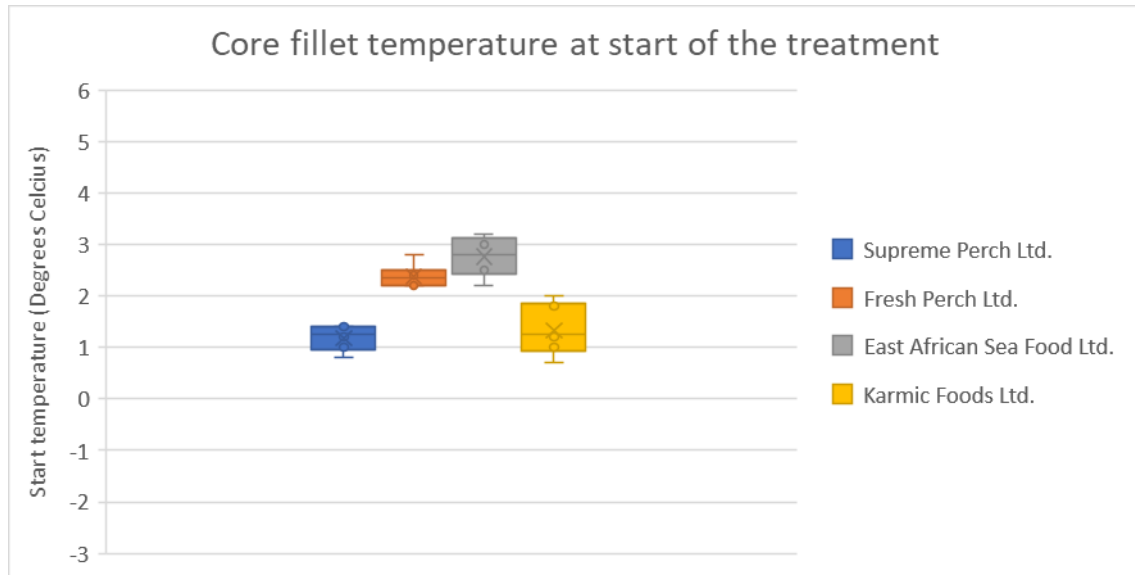

Figure 3.1.1: Core fillet temperature at start superchilling phase, 24 samples gathered in the period 30 May 2018 – 5 June 2018.

The maximum temperature measured was 3.2 °C (East African Sea Food Ltd.). The minimum temperature measured came from Karmic Foods Ltd., 0.7 °C.

Figure 3.1.2 shows the core fillet temperatures at the end of the superchilling process for the in table 2.1 mentioned suppliers of superchilled Nile perch. The average core temperature differ between -0.7 °C (Karmic Foods Ltd.) and -1.6 °C (Supreme Perch Ltd.).

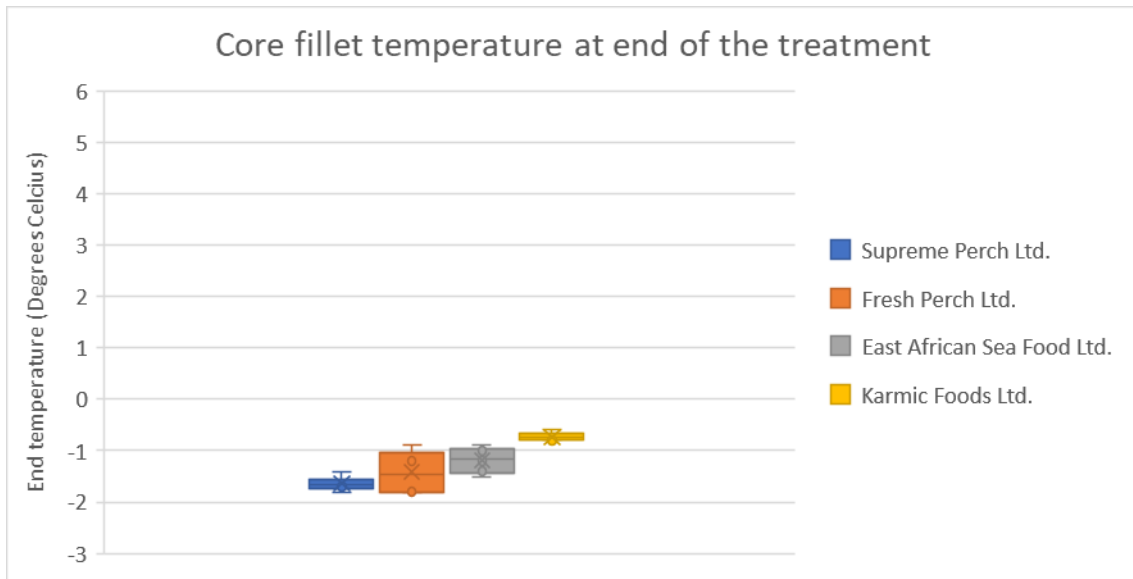

Figure 3.1.2: Core fillet temperature at end superchilling phase, 24 samples gathered in the period 30 May 2018 – 5 June 2018.

The maximum temperature measured was  $-0.6\text{ }^{\circ}\text{C}$  (Karmic Foods Ltd.). The minimum temperature measured came from Fresh Perch Ltd.,  $-1.8\text{ }^{\circ}\text{C}$ .

Figure 3.1.3 shows the duration of superchilling process for the in table 2.1 mentioned suppliers of superchilled Nile perch. The average treatment differ between 30 minutes (Karmic Foods Ltd.) and 44 minutes (Supreme Perch Ltd.).

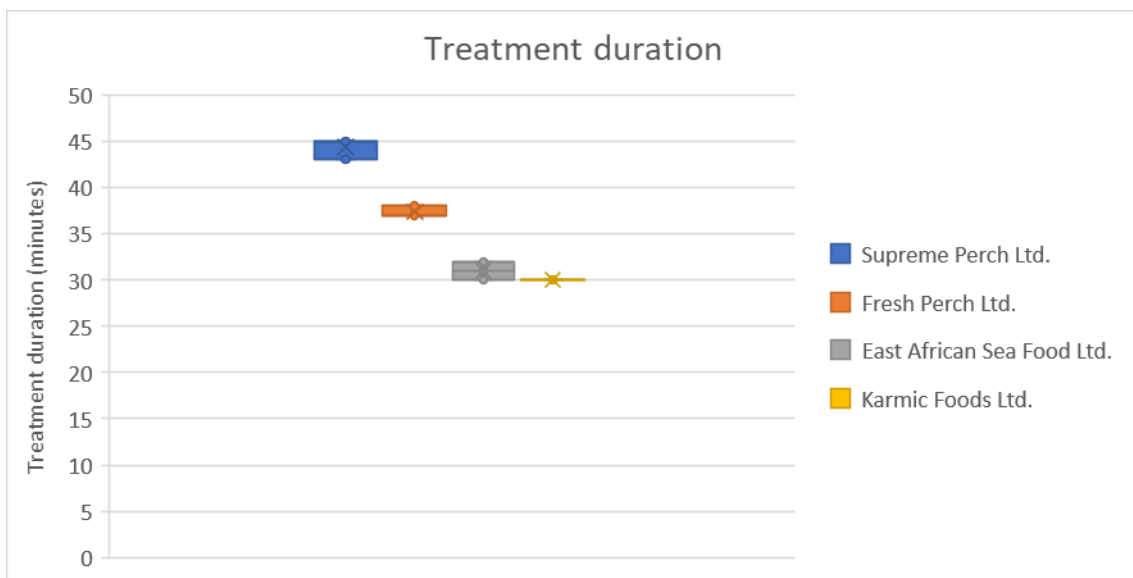

Figure 3.1.3: Treatment duration superchilling process, 24 samples gathered in the period 30 May 2018 – 5 June 2018.

The maximum treatment duration was 45 minutes (Supreme Perch Ltd.). The minimum treatment duration came from East African Sea Food Ltd. and Karmic Foods Ltd., 30 minutes.

Table 3.1.1 shows the independent party that was involved in getting the information about the superchilling process described in chapter 3.1.2.

Table 3.1.1: Independent parties worked on the validated research in the superchilling process.

| SUPPLIER                          | COUNTRY  | INDEPENDENT PARTY                                                                        |
|-----------------------------------|----------|------------------------------------------------------------------------------------------|
| <b>SUPREME PERCH LTD.</b>         | Tanzania | Director of Fisheries Division, Ministry of Agriculture and Fisheries                    |
| <b>FRESH PERCH LTD.</b>           | Uganda   | Directorate of Fisheries Resource (Ministry of Agriculture, Animal Industry & Fisheries) |
| <b>EAST AFRICAN SEA FOOD LTD.</b> | Kenya    | State Department of Fisheries, Ministry of Agriculture, Livestock and Fisheries          |
| <b>KARMIC FOODS LTD.</b>          | Uganda   | Directorate of Fisheries Resource (Ministry of Agriculture, Animal Industry & Fisheries) |

### 3.1.3. Transport

From four different suppliers one polystyrene box with samples was accompanied with a data logger to monitor the temperature of the fillets during transport. The graphs gathered from the dataloggers can be found in Annex I A1.4.

- One logger was used for the samples coming from Supreme Perch Ltd. - Tanzania (1 logger put into the fish box after superchilling). The Logistic time (Africa establishment → Europe establishment) recorded by the data logger was ~76 hours with a thermal increase during the transport of +1.3 °C.
- One logger was used for the samples coming from Fresh Perch Ltd. - Uganda (1 logger put into the fish box after superchilling). The Logistic time (Africa establishment → Europe establishment) recorded by the data logger was ~51 hours with a thermal increase during the transport of +2.1 °C. *The data logger shows a temperature increase halfway the transport. For a period of 8-9 hours surface temperature increased to +2 °C (see annex I A1.4).*
- One logger was used for the samples coming from Karmic Foods Ltd. - Uganda (1 logger put into the fish box after superchilling). The Logistic time (Africa establishment → Europe establishment) recorded by the data logger was ~119 hours with a thermal increase during the transport of +1.2 °C.
- One logger was used for the samples coming from East Africa Sea Food Ltd. - Kenya (1 logger put into the fish box after superchilling). The Logistic time (Africa establishment → Europe establishment) recorded by the data logger was ~116 hours with a thermal increase during the transport of +1.9 °C. *The data logger shows a temperature increase around the first of June 2018. For a period of ~4 hours surface temperature was >5 °C (see annex I A1.4).*

From the for sample boxes the core temperature at arrival Europe establishment were measured. In table 3.1.2 you can find the results of these measurements.

The core temperature at arrival Europe establishment varied between -1.6 and +0.5 °C. The maximum temperature was measured from the sample of East African Sea Food Ltd., +0.5 °C. The minimum temperature measured was -1.6 °C (Supreme Perch Ltd.). Detailed information about temperatures at arrival Europe establishment can be found in Annex I A1.2.

Table 3.1.2: Average temperature samples at arrival at an European establishment, 4 sample boxes were measured in the period 1 June 2018 – 8 June 2018.

| <b>PRODUCER</b>                   | <b>CORE TEMPERATURE SAMPLES</b> |
|-----------------------------------|---------------------------------|
| <b>SUPREME PERCH LTD.</b>         | -1.6                            |
| <b>FRESH PERCH LTD.</b>           | -0.8                            |
| <b>EAST AFRICAN SEA FOOD LTD.</b> | 0.5                             |
| <b>KARMIC FOODS LTD.</b>          | -0.5                            |

RIKILT Wageningen University was the independent party that was involved in collecting the information about transport described in chapter 3.1.3.

#### 3.1.4. Microbiological analyses

From each supplier mentioned in table 2.1 two samples were taken to get insights in the microbiological values after arrival (table 3.1.3). The samples were taken by Mérieux NutriScience, an ISO 17025 certified laboratory in the Netherlands. More details of the lab results can be found in Annex I A1.3. In all samples no salmonella was found and E.Coli and Listeria levels were <10 CFU per gram. Total plate count varied between 26,000 CFU/G (Karmic Foods Ltd.) and >300,000 CFU/G (Supreme Perch Ltd.).

Table 3.1.3: Microbiological information from 8 samples, gathered from the supplier mentioned in table 2.1.

| SUPPLIER                     | PRODUCTIO<br>N DATE | ANALYSES<br>DATE | TOTAL<br>COUNT (CFU/G) | PLATE<br>ENTEROBACTERIACE<br>AE (CFU/G) | SALMONELLA<br>(/25G) | E. COLI<br>(CFU/G) | LISTERIA<br>MONOCYTOGENES<br>(CFU/G) |
|------------------------------|---------------------|------------------|------------------------|-----------------------------------------|----------------------|--------------------|--------------------------------------|
| FRESH PERCH LTD.             | 30-5-2018           | 1-6-2018         | 140,000                | 1,200                                   | Absent               | <10                | <10                                  |
| FRESH PERCH LTD.             | 30-5-2018           | 1-6-2018         | 300,000                | 720                                     | Absent               | <10                | <10                                  |
| EAST AFRICAN<br>SEAFOOD LTD. | 30-5-2018           | 4-6-2018         | 180,000                | 740                                     | Absent               | <10                | <10                                  |
| EAST AFRICAN<br>SEAFOOD LTD. | 30-5-2018           | 4-6-2018         | 280,000                | 750                                     | Absent               | <10                | <10                                  |
| KARMIC FOODS<br>LTD.         | 30-5-2018           | 4-6-2018         | 210,000                | 250                                     | Absent               | <10                | <10                                  |
| KARMIC FOODS<br>LTD.         | 30-5-2018           | 4-6-2018         | 26,000                 | 130                                     | Absent               | <10                | <10                                  |
| SUPREME PERCH<br>LTD.        | 5-6-2018            | 8-6-2018         | >300.000               | 9.900                                   | Absent               | <10                | <10                                  |
| SUPREME PERCH<br>LTD.        | 5-6-2018            | 8-6-2018         | >300.000               | 6.200                                   | Absent               | <10                | <10                                  |

### 3.1.5. Enzyme determination of HADH

Figure 3.1.4 shows the positive reference sample of a Nile Perch that is deep frozen. The Enzymatic HADH activity decrease ratio determines if fish products were frozen or not.

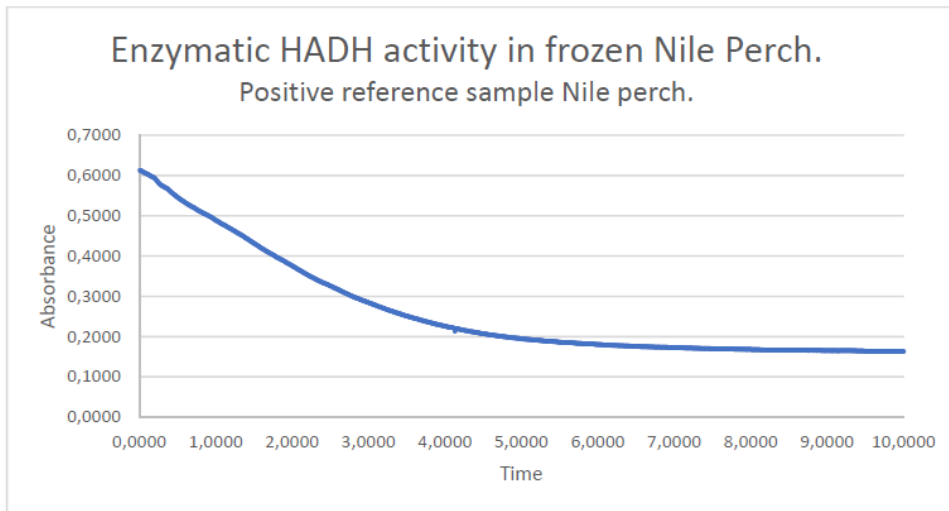

Figure 3.1.4: Enzymatic HADH activity in laboratory reference sample Nile Perch. Frozen for 48 hours at -24 °C. Source: RIKILT Wageningen University.

Figure 3.1.5, 3.1.6, 3.1.7 and 3.1.8 show the enzymatic HADH activity for superchilled samples from the supplier mentioned in table 2.1. The Enzymatic HADH activity decrease ratio in all samples show that the superchilled Nile Perch fillets have not been frozen. The full RIKILT report about enzymatic HADH activity can be found in annex I A1.2.

RIKILT Wageningen University was the independent party that was involved in collecting the information about enzymatic HADH activity in this chapter.

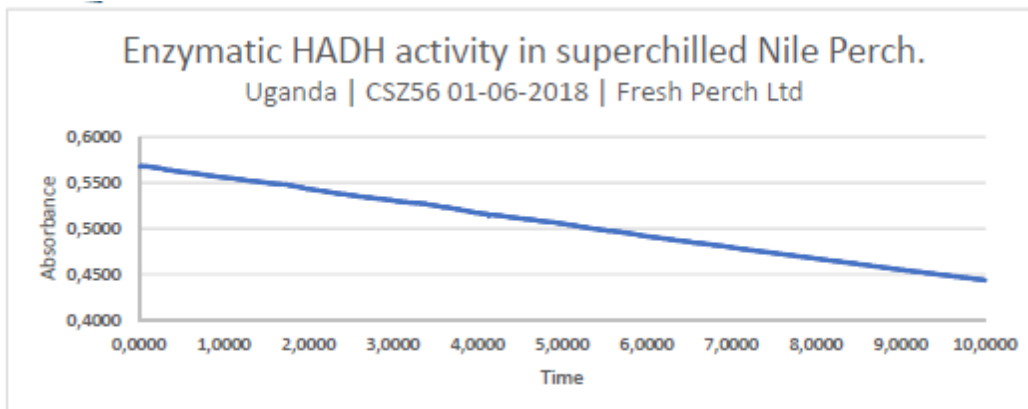

Figure 3.1.5: Enzymatic HADH activity superchilled Nile Perch from Fresh Perch Ltd. Uganda, 1 June 2018. Source: RIKILT Wageningen University.



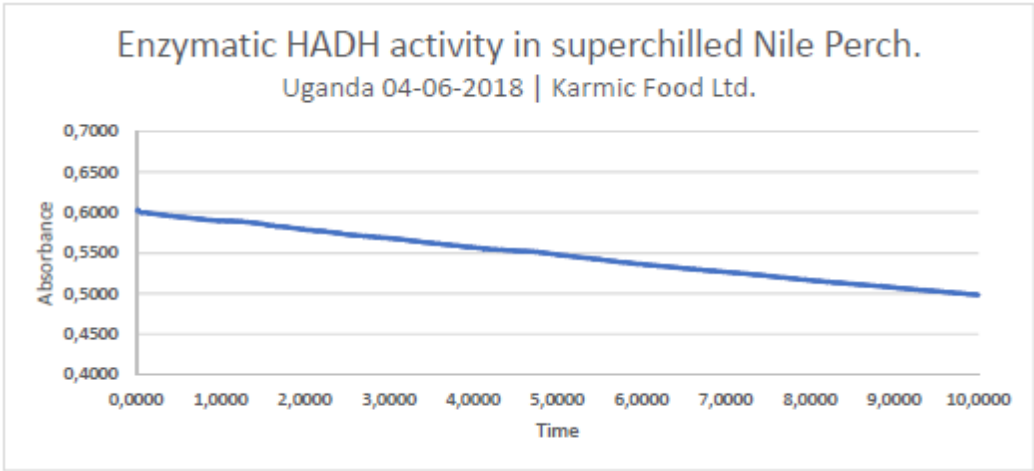

Figure 3.1.6: Enzymatic HADH activity superchilled Nile Perch from Karmic Foods Ltd. Uganda, 4 June 2018. Source: RIKILT Wageningen University.

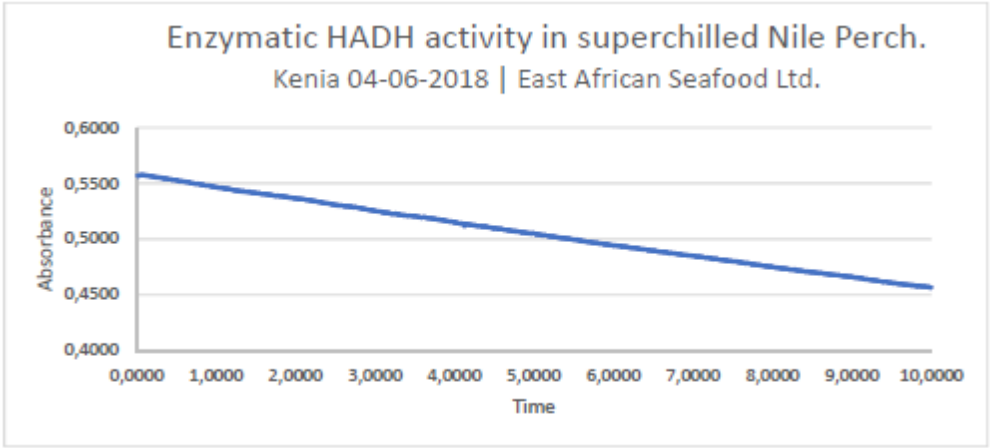

Figure 3.1.7: Enzymatic HADH activity superchilled Nile Perch from East African Seafood Ltd. Kenya, 4 June 2018. Source: RIKILT Wageningen University.

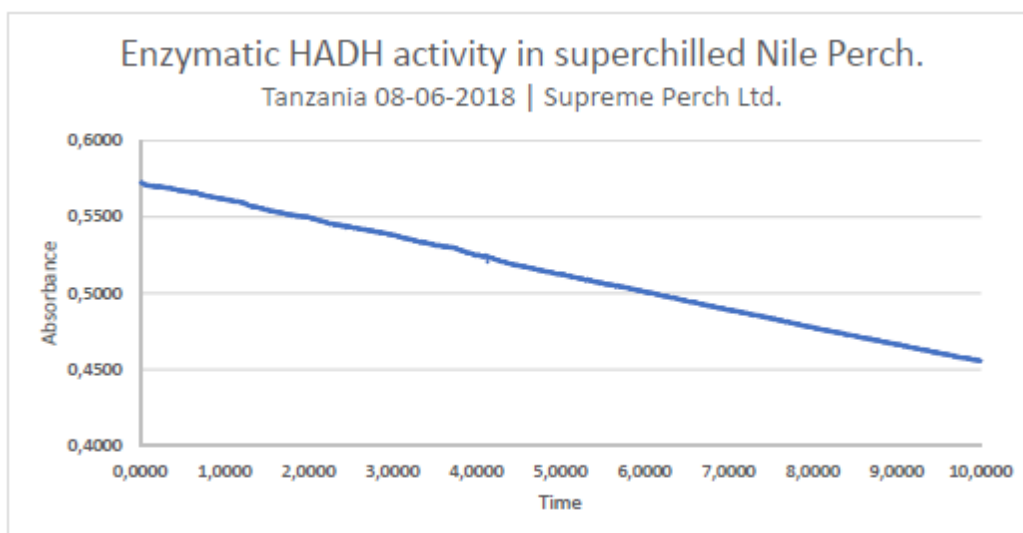

Figure 3.1.8: Enzymatic HADH activity superchilled Nile Perch from Supreme Perch Ltd. Kenya, 8 June 2018. Source: RIKILT Wageningen University.

## 3.2. Company self-monitoring program

### 3.2.1. General information

The private sector collected information about the superchilling process, cold chain during transport and core temperature at destination Europe establishment. In total:

- 968 samples of Nile perch fillets were measured to get more insights of the superchilling process;
- 9 data loggers are used to get more insights of the cold chain during transport of the superchilled products;
- 474 samples of Nile perch fillets were measured at arrival Europe establishment to get more insights into the temperature of the superchilled products at arrival.

Information about the outcomes are described in the paragraphs 3.2.2 and 3.3.3.

### 3.2.2. Superchilling process

Figure 3.2.1 and table 3.2.1 show the core fillet temperatures at the start of the superchilling process for five different suppliers of superchilled Nile perch. In total 968 samples were taken. The average core temperature differ between 0.2 °C (Victoria Perch Ltd.) and 3.6 °C (Lake Bounty Ltd.).

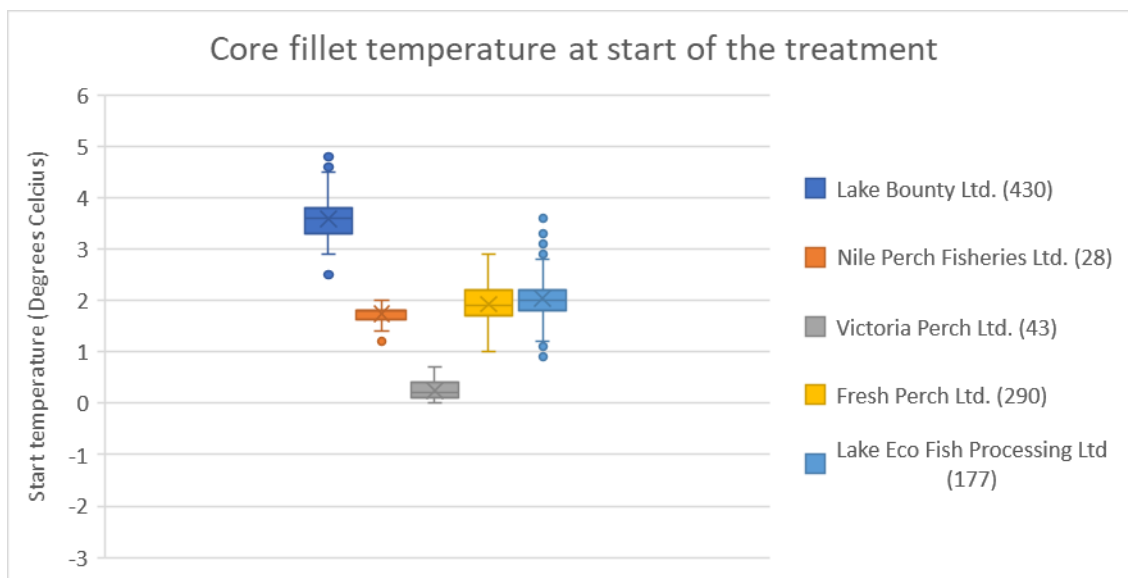

Figure 3.2.1: Core fillet temperature at start superchilling phase, 968 samples gathered in the period December 2017 – March 2018.

The maximum temperature measured was 4.8 °C (Lake Bounty Ltd.). The minimum temperature measured came from Victoria Perch Ltd., 0 °C.

Table 3.2.1: Core fillet temperature at start superchilling phase, 968 samples gathered in the period December 2017 – March 2018.

|                | LAKE BOUNTY LTD. | NILE PERCH FISHERIES LTD. | VICTORIA PERCH LTD. | FRESH PERCH LTD. | LAKE ECO FISH PROCESSING LTD |
|----------------|------------------|---------------------------|---------------------|------------------|------------------------------|
| # SAMPLES      | 430              | 28                        | 43                  | 290              | 177                          |
| AVERAGE        | 3.6              | 1.7                       | 0.2                 | 1.9              | 2.0                          |
| FIRST QUARTILE | 3.3              | 1.7                       | 0.1                 | 1.7              | 1.8                          |
| MEDIAN         | 3.6              | 1.8                       | 0.2                 | 1.9              | 2.0                          |
| THIRD QUARTILE | 3.8              | 1.8                       | 0.4                 | 2.2              | 2.2                          |

Figure 3.2.2 and table 3.2.2 show the core fillet temperatures at the end of the superchilling process for the five different suppliers of superchilled Nile perch. The average core temperature differ between -0.9 °C (Nile Perch Fisheries Ltd.) and -1.6 °C (Lake Bounty Ltd. & Victoria Perch Ltd.).

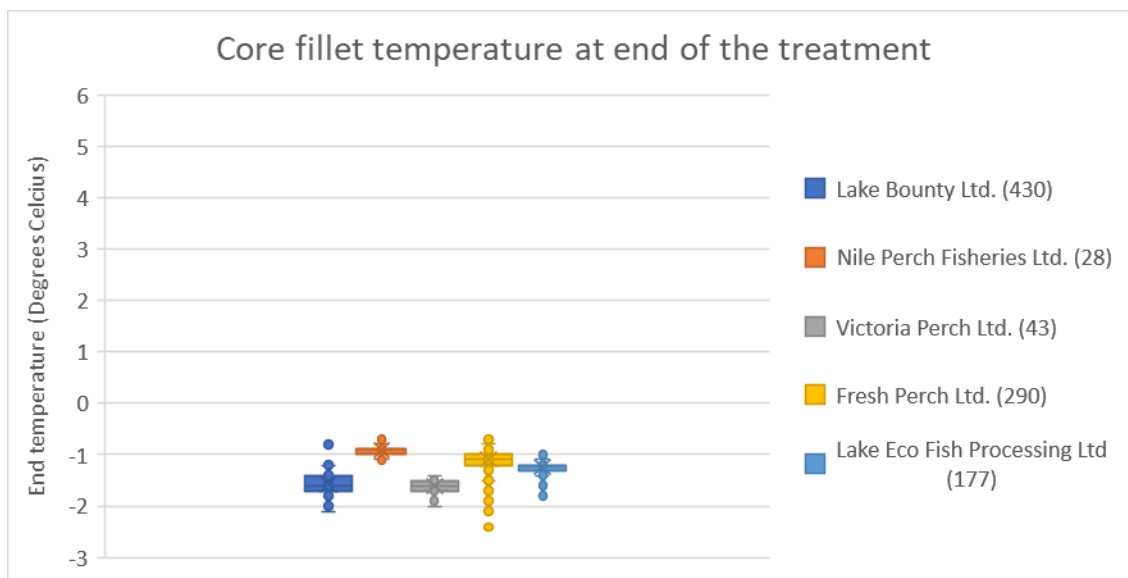

Figure 3.2.2: Core fillet temperature at end superchilling phase, 968 samples gathered in the period December 2017 – March 2018.

The maximum temperature measured was -0.6 °C (Fresh Perch Ltd.). The minimum temperature measured came from Fresh Perch Ltd., -2.4 °C.

Table 3.2.2: Core fillet temperature at end superchilling phase, 968 samples gathered in the period December 2017 – March 2018.

|                | LAKE BOUNTY LTD. | NILE PERCH FISHERIES LTD. | VICTORIA PERCH LTD. | FRESH PERCH LTD. | LAKE ECO FISH PROCESSING LTD |
|----------------|------------------|---------------------------|---------------------|------------------|------------------------------|
| # SAMPLES      | 430              | 28                        | 43                  | 290              | 177                          |
| AVERAGE        | -1.6             | -0.9                      | -1.6                | -1.1             | -1.2                         |
| FIRST QUARTILE | -1.7             | -1.0                      | -1.7                | -1.2             | -1.3                         |
| MEDIAN         | -1.6             | -0.9                      | -1.6                | -1.1             | -1.2                         |
| THIRD QUARTILE | -1.4             | -0.9                      | -1.5                | -1.0             | -1.2                         |

Figure 3.2.3 and table 3.2.3 show the duration of superchilling process for the five different suppliers of superchilled Nile perch. The average treatment differ between 32 minutes (Fresh Perch Ltd.) and - 52 minutes (Victoria Perch Ltd.).

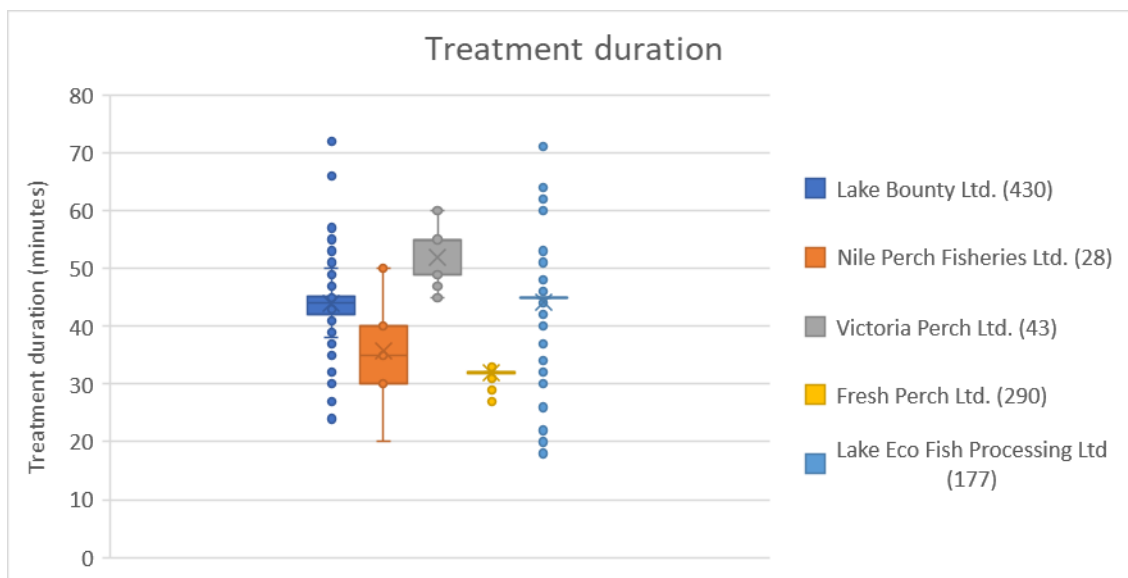

Figure 3.2.3: Treatment duration superchilling process, 968 samples gathered in the period December 2017 – March 2018.

The maximum treatment duration was 72 minutes (Lake Bounty Ltd.). The minimum treatment duration came from Nile Perch Fisheries Ltd., 20 minutes.

Table 3.2.3: Treatment duration superchilling process, 968 samples gathered in the period December 2017 – March 2018.

|                | LAKE BOUNTY LTD. | NILE PERCH FISHERIES LTD. | VICTORIA PERCH LTD. | FRESH PERCH LTD. | LAKE ECO FISH PROCESSING LTD |
|----------------|------------------|---------------------------|---------------------|------------------|------------------------------|
| # SAMPLES      | 430              | 28                        | 43                  | 290              | 177                          |
| AVERAGE        | 44               | 36                        | 52                  | 32               | 44                           |
| FIRST QUARTILE | 42               | 30                        | 49                  | 32               | 45                           |
| MEDIAN         | 44               | 35                        | 55                  | 32               | 45                           |
| THIRD QUARTILE | 45               | 40                        | 55                  | 32               | 45                           |

### 3.2.3. Transport

For 9 samples data loggers were used to monitor the temperature of the fillets during transport. The graphs gathered from the dataloggers can be found in Annex II A2.2.

- Two loggers were used for samples coming from Fresh Perch Ltd. - Uganda (1 data logger put into the fish box before superchilling and 1 logger put into the fish box after superchilling. The Logistic time (Africa establishment → Europe establishment) recorded by the data logger was ~36 hours with a thermal increase during the transport of +1.5 °C.
- Two loggers were used for samples coming from Lake Eco Fish Processing Ltd.- Uganda (1 data logger put into the fish box before superchilling and 1 logger put into the fish box after superchilling. The Logistic time (Africa establishment → Europe establishment) recorded by the data logger was ~36 hours with a thermal increase during the transport of +1.8 °C.
- Two loggers were used for samples coming from Nile Perch Fisheries Ltd. - Tanzania (1 data logger put into the fish box before superchilling and 1 logger put into the fish box after

superchilling. The Logistic time (Africa establishment → Europe establishment) recorded by the data logger was ~58 hours with a thermal increase during the transport of +0.6 °C.

- Two loggers were used for samples coming from Supreme Perch Ltd. – Tanzania (1 data logger put into the fish box before superchilling and 1 logger put into the fish box after superchilling. The Logistic time (Africa establishment → Europe establishment) recorded by the data logger was ~92 hours with a thermal increase during the transport of +0.6 °C.
- One logger was used for samples coming from Victoria Perch Ltd. – Tanzania (1 logger put into the fish box after superchilling). The Logistic time (Africa establishment → Europe establishment) recorded by the data logger was ~58 hours with a thermal increase during the transport of +0.2 °C.

From 474 samples the core temperature at arrival Europe establishment were measured. In figure 3.2.4 you can find the results of these measurements.

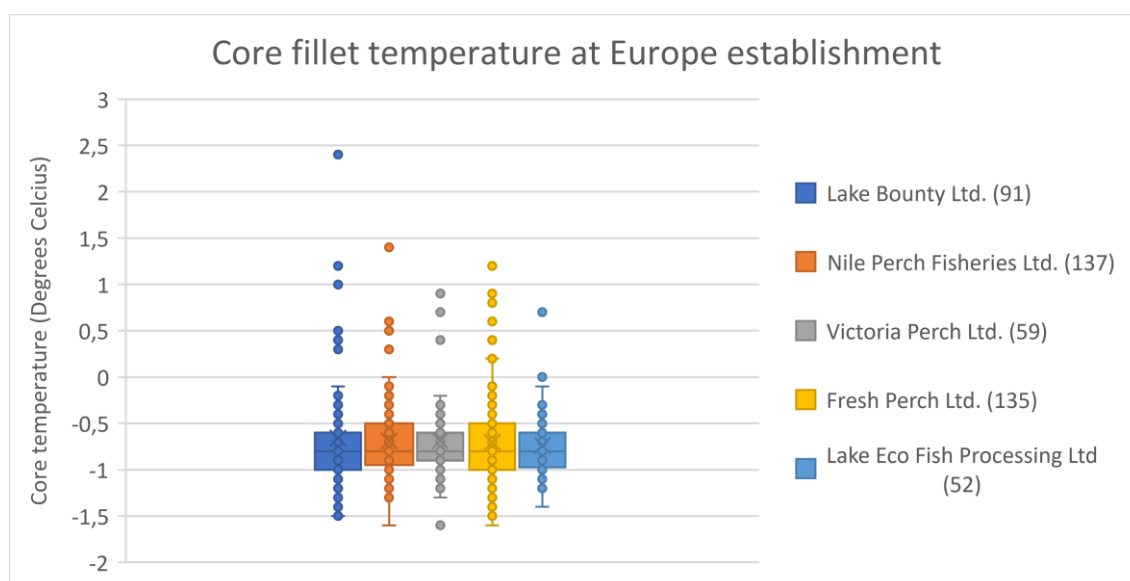

Figure 3.2.4: Core fillet temperature at arrival Europe establishment, 474 samples gathered in the period December 2017 – March 2018.

The average temperature at arrival Europe establishment was -0.7 °C for all suppliers. 75% of the samples had temperatures between -0.9/-1.0 °C and -0.5/-0.6 °C (Table 3.2.4). The maximum temperature was measured at a sample from Lake Bounty Ltd, +2.4 °C. The minimum temperature measured was -1.6 °C (Victoria Perch Ltd.). Detailed information about temperatures at arrival Europe establishment can be found in Annex II A2.3.

Table 3.2.4: Core fillet temperature at arrival Europe establishment, 474 samples gathered in the period December 2017 – March 2018.

|                | LAKE BOUNTY LTD. | NILE PERCH FISHERIES LTD. | VICTORIA PERCH LTD. | FRESH PERCH LTD. | LAKE ECO FISH PROCESSING LTD |
|----------------|------------------|---------------------------|---------------------|------------------|------------------------------|
| # SAMPLES      | 91               | 137                       | 59                  | 135              | 52                           |
| AVERAGE        | -0.7             | -0.7                      | -0.7                | -0.7             | -0.7                         |
| FIRST QUARTILE | -1.0             | -0.9                      | -0.9                | -1.0             | -0.9                         |
| MEDIAN         | -0.8             | -0.8                      | -0.8                | -0.8             | -0.8                         |
| THIRD QUARTILE | -0.6             | -0.5                      | -0.6                | -0.5             | -0.6                         |

## 4. Conclusions

From existing literature and collected research data the following can be concluded:

Literature:

- Superchilling exists already for many years;
- Superchilling is already used in the fresh fish and meat industry and is described for species like salmon, cod, squid, poultry, prawns and pork (Massaquoi *et al.*, 2011; Duun *et al.*, 2008; Jones, 2015; Thordarson *et al.*, 2017);
- Superchilling is defined as a technique that reduces the temperature of fish uniformly to a point slightly below that obtained in melting ice (J.J. Waterman *et al.*, 2001);
- It should be noted that seawater freezes at about  $-2^{\circ}\text{C}$  or  $-3^{\circ}\text{C}$ , depending on salinity, and that Regulation 852/2004 does allow ice to be made of seawater, so the temperature of melting ice should encompass sub-zero temperatures at least to  $-3^{\circ}\text{C}$ ;
- Superchilling is used to reduce the temperature of the product to the point of initial freezing; low enough to substantially reduce bacterial activity but high enough to avoid significant levels of ice crystal growth that can cause structural damage.

Research project:

- Blast freezers are used to superchill Nile perch fillets. Average superchill duration fluctuated between 30 and 52 minutes;
- The average superchilled Nile perch fillet temperature did not reach temperatures below  $-1.6^{\circ}\text{C}$ . Minimum temperature measured after superchilling was  $-2.4^{\circ}\text{C}$ ;
- The average superchilled Nile perch fillet temperatures stay within the temperature margins of melting ice;
- The average core temperature of the superchilled Nile perch fillets at destination fluctuate between  $+0.5^{\circ}\text{C}$  and  $-1.6^{\circ}\text{C}$ ;<sup>1</sup>
- Microbiological analysis of different samples did not show any salmonella occurrence, and  $<10$  CFU per gram E.Coli and Listeria levels. Total plate count varied between 26,000 CFU/g and  $>300,000$  CFU/g;
- Enzymatic HADH activity ratio in all samples shows in an objective way that superchilled Nile Perch fillets do not originate from deep frozen fish products.

Overall, based on the above mentioned bullets it is concluded that superchilling is a good alternative to maintain the cold chain of fresh fisheries products effectively and that deep frozen products are not used in the superchilling process. Moreover, literature studies and microbiological analyses show that superchilling suppresses bacterial activity, maintains food freshness and preserves nutritional quality.

---

<sup>1</sup> In a normal situation polystyrene boxes are full of Nile Perch fillets. In the research project boxes were filled with only six fillets per box. Due to the high amount of free space in some of the boxes more energy was spent cooling the air in the boxes, which resulted in relatively high temperatures in these boxes at destination (around  $+0.5^{\circ}\text{C}$ ).

## 5. References

- Banerjee R., Maheswarappa N.B., (2017). *Superchilling of muscle foods: Potential alternative for chilling and freezing*. Critical Reviews in Food Science and Nutrition.
- Chun-hua W.U., Chun-hong Y., Xing-qian Y., Ya-qin H., Shi-guo C., Dong-hong L., (2014). *A Critical Review on Superchilling Preservation Technology in Aquatic Product*, Journal of Integrative Agriculture, vol. 13, issue 12, pp. 2788-2806, ISSN 2095-3119.
- Duun A.S, Hemmingsen A.K.T., Haugland A., Rustad T., (2008). *Quality changes during superchilled storage of pork roast*, Food Science and Technology, vol. 41, issue 10, pp. 2136-2143.
- Duun A.S., Rustad. T., (2008). *Quality of superchilled vacuum packed Atlantic salmon (Salmo salar) fillets stored at -1.4°C and -3.6°C*. Food Chem. 106:122–131.
- Gottesmann P., Hamm, R. (1983). *New biochemical methods of differentiating between fresh meat and thawed, frozen meat*. Fleischwirtschaft. 63. 219-221.
- Hoz L., Fernández M., Díaz O., Ordóñez J.A., Pavlov A., García de Fernando G.D., (1993). *Differentiation of unfrozen and frozen-thawed kuruma prawn (Penaeus japonicus) from the activity of  $\beta$ -hydroxyacyl-CoA-dehydrogenase (HADH) in aqueous extracts*, Food Chemistry, vol. 48, issue 2, pp. 127-129, ISSN 0308-8146.
- Jones G., (2015). *Extending the shelf-life of meat and fish products with superchilling*. Article in International Meat Topic, vol. 6 number 5, pp. 20-21.
- Kaale L.D., Eikevik T.M., Rustad T., Kolsaker K., (2011). *Superchilling of food: A review*. Journal of Food Engineering, vol. 107, pp. 141–146.
- Massaquoi H., Sveinsdóttir K., Martinsdóttir E., (2011). *Quality changes of fish from catch to processing during storage with focus on cooling practices and practical application of Sierra Leone*. UN University Fisheries Training Programme, pp. 45.
- Shafel T., Hyun Lee S., Jun S., (2015). *Food Preservation Technology at Subzero Temperatures: A Review*. Journal of Biosystems Engineering; 40(3): 261-270.
- Thordarson G., Arason S., Karlsdóttir M., (2017). *Sub chilling of fish*. Project initiated by fish related companies in Iceland, Norway, Denmark and Finland, pp. 63.
- Waterman J.J., Taylor D.H., (2001). *Superchilling*, Torry Research Station - Torry Advisory Note No. 32, FAO in partnership with support unit for international fisheries and aquatic research, SIFAR.



## Annex I Validated research by independent party

### A1.1 Superchilling information at origin

In the table below information about the superchilling procedure is given for the samples used for the validated research in this report.

| Date      | Supplier                   | Samplernr | Start treatment | End treatment | treatment duration | Freezer temperature | Freezer type  | Independant authority                                                                    | Country  |
|-----------|----------------------------|-----------|-----------------|---------------|--------------------|---------------------|---------------|------------------------------------------------------------------------------------------|----------|
| 5-6-2018  | Supreme Perch Ltd.         | 1         | 0,8             | -1,6          | 45                 | -20                 | Blast Freezer | Director of Fisheries Division, Ministry of Agriculture and Fisheries                    | Tanzania |
| 5-6-2018  | Supreme Perch Ltd.         | 2         | 1,4             | -1,6          | 45                 | -20                 | Blast Freezer | Director of Fisheries Division, Ministry of Agriculture and Fisheries                    | Tanzania |
| 5-6-2018  | Supreme Perch Ltd.         | 3         | 1               | -1,8          | 43                 | -20                 | Blast Freezer | Director of Fisheries Division, Ministry of Agriculture and Fisheries                    | Tanzania |
| 5-6-2018  | Supreme Perch Ltd.         | 4         | 1,3             | -1,4          | 43                 | -20                 | Blast Freezer | Director of Fisheries Division, Ministry of Agriculture and Fisheries                    | Tanzania |
| 5-6-2018  | Supreme Perch Ltd.         | 5         | 1,2             | -1,7          | 45                 | -20                 | Blast Freezer | Director of Fisheries Division, Ministry of Agriculture and Fisheries                    | Tanzania |
| 5-6-2018  | Supreme Perch Ltd.         | 6         | 1,4             | -1,7          | 45                 | -20                 | Blast Freezer | Director of Fisheries Division, Ministry of Agriculture and Fisheries                    | Tanzania |
| 30-5-2018 | Fresh Perch Ltd.           | 1         | 2,2             | -1,8          | 37                 | -25                 | Blast Freezer | Directorate of Fisheries Resource (Ministry of Agriculture, Animal Industry & Fisheries) | Uganda   |
| 30-5-2018 | Fresh Perch Ltd.           | 2         | 2,4             | -1,1          | 37                 | -25                 | Blast Freezer | Directorate of Fisheries Resource (Ministry of Agriculture, Animal Industry & Fisheries) | Uganda   |
| 30-5-2018 | Fresh Perch Ltd.           | 3         | 2,2             | -1,7          | 37                 | -25                 | Blast Freezer | Directorate of Fisheries Resource (Ministry of Agriculture, Animal Industry & Fisheries) | Uganda   |
| 30-5-2018 | Fresh Perch Ltd.           | 4         | 2,4             | -1,2          | 37                 | -25                 | Blast Freezer | Directorate of Fisheries Resource (Ministry of Agriculture, Animal Industry & Fisheries) | Uganda   |
| 30-5-2018 | Fresh Perch Ltd.           | 5         | 2,8             | -1,8          | 38                 | -25                 | Blast Freezer | Directorate of Fisheries Resource (Ministry of Agriculture, Animal Industry & Fisheries) | Uganda   |
| 30-5-2018 | Fresh Perch Ltd.           | 6         | 2,3             | -0,9          | 38                 | -25                 | Blast Freezer | Directorate of Fisheries Resource (Ministry of Agriculture, Animal Industry & Fisheries) | Uganda   |
| 30-5-2018 | East African Sea Food Ltd. | 1         | 2,6             | -1,2          | 31                 | -18                 | Blast Freezer | State Department of Fisheries, Ministry of Agriculture, Livestock and Fisheries          | Kenya    |

|           |                            |   |     |      |    |     |               |                                                                                          |        |
|-----------|----------------------------|---|-----|------|----|-----|---------------|------------------------------------------------------------------------------------------|--------|
| 30-5-2018 | East African Sea Food Ltd. | 2 | 3,2 | -0,9 | 32 | -18 | Blast Freezer | State Department of Fisheries, Ministry of Agriculture, Livestock and Fisheries          | Kenya  |
| 30-5-2018 | East African Sea Food Ltd. | 3 | 3,1 | -1,4 | 31 | -18 | Blast Freezer | State Department of Fisheries, Ministry of Agriculture, Livestock and Fisheries          | Kenya  |
| 30-5-2018 | East African Sea Food Ltd. | 4 | 2,5 | -1,1 | 30 | -18 | Blast Freezer | State Department of Fisheries, Ministry of Agriculture, Livestock and Fisheries          | Kenya  |
| 30-5-2018 | East African Sea Food Ltd. | 5 | 2,2 | -1   | 30 | -18 | Blast Freezer | State Department of Fisheries, Ministry of Agriculture, Livestock and Fisheries          | Kenya  |
| 30-5-2018 | East African Sea Food Ltd. | 6 | 3   | -1,5 | 32 | -18 | Blast Freezer | State Department of Fisheries, Ministry of Agriculture, Livestock and Fisheries          | Kenya  |
| 30-5-2018 | Karmic Foods Ltd.          | 1 | 1   | -0,8 | 30 | -20 | Blast Freezer | Directorate of Fisheries Resource (Ministry of Agriculture, Animal Industry & Fisheries) | Uganda |
| 30-5-2018 | Karmic Foods Ltd.          | 2 | 0,7 | -0,7 | 30 | -20 | Blast Freezer | Directorate of Fisheries Resource (Ministry of Agriculture, Animal Industry & Fisheries) | Uganda |
| 30-5-2018 | Karmic Foods Ltd.          | 3 | 1,3 | -0,8 | 30 | -20 | Blast Freezer | Directorate of Fisheries Resource (Ministry of Agriculture, Animal Industry & Fisheries) | Uganda |
| 30-5-2018 | Karmic Foods Ltd.          | 4 | 1,2 | -0,6 | 30 | -20 | Blast Freezer | Directorate of Fisheries Resource (Ministry of Agriculture, Animal Industry & Fisheries) | Uganda |
| 30-5-2018 | Karmic Foods Ltd.          | 5 | 2   | -0,8 | 30 | -20 | Blast Freezer | Directorate of Fisheries Resource (Ministry of Agriculture, Animal Industry & Fisheries) | Uganda |
| 30-5-2018 | Karmic Foods Ltd.          | 6 | 1,8 | -0,7 | 30 | -20 | Blast Freezer | Directorate of Fisheries Resource (Ministry of Agriculture, Animal Industry & Fisheries) | Uganda |

Pictures and validation stamps of the samples are given below

|                     |                                                                   |                                                                                   |
|---------------------|-------------------------------------------------------------------|-----------------------------------------------------------------------------------|
| Sample No.<br><br>1 | Company name:                                                     | SUPREME PERCH (Bukoba) LTD P.O.Box 139 Bukoba, Tanzania                           |
|                     | Product information                                               | Chilled Nile perch fillet ( <i>Lates niloticus</i> )                              |
|                     | Presentation form                                                 | Individual bagged fillet                                                          |
|                     | Batch No.                                                         | 0323718                                                                           |
|                     | Date of sampling                                                  | 05.06.2018                                                                        |
|                     | Type of freezer                                                   | Blast freezer                                                                     |
|                     | Name of the independent controller<br>Controller and organization | Director of Fisheries Division, Ministry of Agriculture, Livestock and Fisheries. |

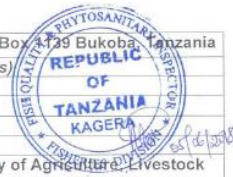

START: Before entering the chilling room

STOP: After exiting the chilling room

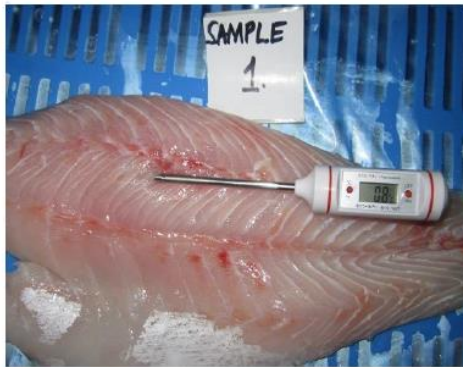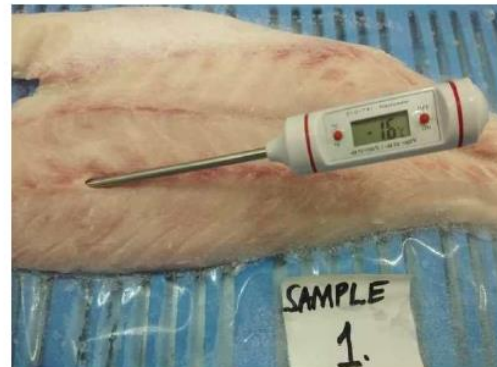

|                         |         |
|-------------------------|---------|
| Start core Temperature  | +0.8° C |
| Start time chilling     | 11:00AM |
| Temperature of freezing | - 20° C |

|                         |          |
|-------------------------|----------|
| Finish core Temperature | - 1.6° C |
| Finish time chilling    | 11:45AM  |
| Temperature of freezing | -20° C   |

|                     |                                                                   |                                                                                   |
|---------------------|-------------------------------------------------------------------|-----------------------------------------------------------------------------------|
| Sample No.<br><br>2 | Company name:                                                     | SUPREME PERCH (Bukoba) LTD P.O.Box 139 Bukoba, Tanzania                           |
|                     | Product information                                               | Chilled Nile perch fillet ( <i>Lates niloticus</i> )                              |
|                     | Presentation form                                                 | Individual bagged fillet                                                          |
|                     | Batch No.                                                         | 0323718                                                                           |
|                     | Date of sampling                                                  | 05.06.2018                                                                        |
|                     | Type of freezer                                                   | Blast freezer                                                                     |
|                     | Name of the independent controller<br>Controller and organization | Director of Fisheries Division, Ministry of Agriculture, Livestock and Fisheries. |

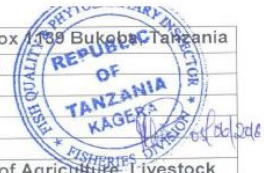

START: Before entering the chilling room

STOP: After exiting the chilling room

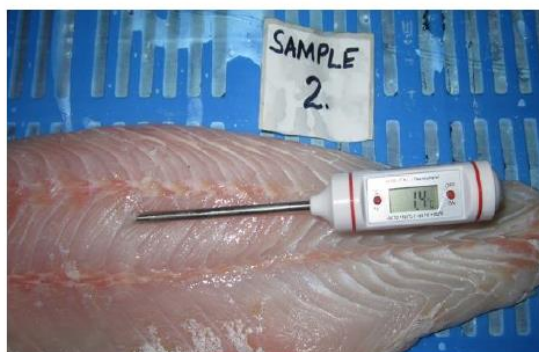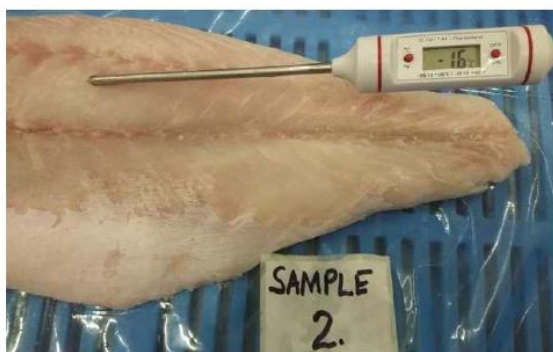

|                         |         |
|-------------------------|---------|
| Start core Temperature  | +1.4° C |
| Start time chilling     | 11:00AM |
| Temperature of freezing | - 20° C |

|                         |          |
|-------------------------|----------|
| Finish core Temperature | - 1.6° C |
| Finish time chilling    | 11:45AM  |
| Temperature of freezing | -20° C   |

|                 |                                                                   |                                                                                      |
|-----------------|-------------------------------------------------------------------|--------------------------------------------------------------------------------------|
| Sample No.<br>3 | Company name:                                                     | SUPREME PERCH (Bukoba) LTD P.O.Box 139 Bukoba Tanzania                               |
|                 | Product information                                               | Chilled Nile perch fillet ( <i>Lates niloticus</i> )                                 |
|                 | Presentation form                                                 | Individual bagged fillet                                                             |
|                 | Batch No.                                                         | 0323718                                                                              |
|                 | Date of sampling                                                  | 05.06.2018                                                                           |
|                 | Type of freezer                                                   | Blast freezer                                                                        |
|                 | Name of the independent controller<br>Controller and organization | Director of Fisheries Division, Ministry of Agriculture, Livestock<br>and Fisheries. |

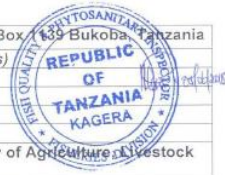

START: Before entering the chilling room

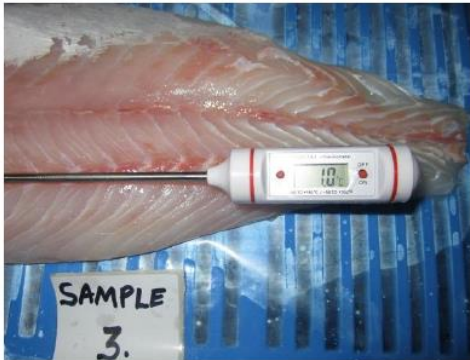

|                         |         |
|-------------------------|---------|
| Start core Temperature  | +1.0° C |
| Start time chilling     | 11:07AM |
| Temperature of freezing | -20° C  |

STOP: After exiting the chilling room

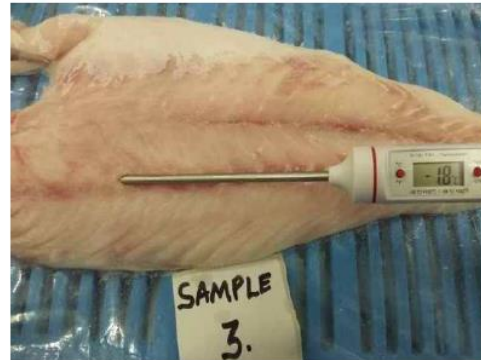

|                         |         |
|-------------------------|---------|
| Finish core Temperature | -1.8° C |
| Finish time chilling    | 11:50AM |
| Temperature of freezing | -20° C  |

|                 |                                                                   |                                                                                      |
|-----------------|-------------------------------------------------------------------|--------------------------------------------------------------------------------------|
| Sample No.<br>4 | Company name:                                                     | SUPREME PERCH (Bukoba) LTD P.O.Box 139 Bukoba Tanzania                               |
|                 | Product information                                               | Chilled Nile perch fillet ( <i>Lates niloticus</i> )                                 |
|                 | Presentation form                                                 | Individual bagged fillet                                                             |
|                 | Batch No.                                                         | 0323718                                                                              |
|                 | Date of sampling                                                  | 05.06.2018                                                                           |
|                 | Type of freezer                                                   | Blast freezer                                                                        |
|                 | Name of the independent controller<br>Controller and organization | Director of Fisheries Division, Ministry of Agriculture, Livestock<br>and Fisheries. |

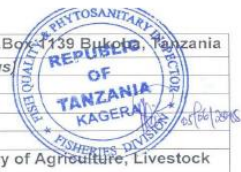

START: Before entering the chilling room

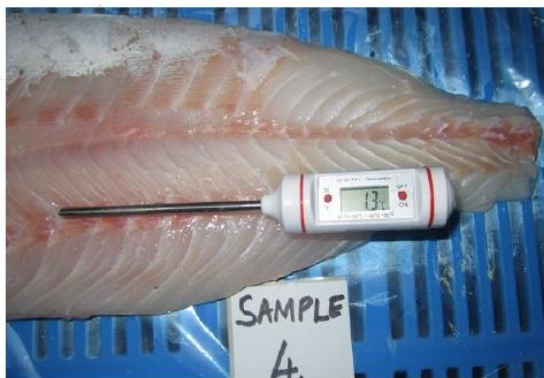

|                         |         |
|-------------------------|---------|
| Start core Temperature  | +1.3° C |
| Start time chilling     | 11:07AM |
| Temperature of freezing | -20° C  |

STOP: After exiting the chilling room

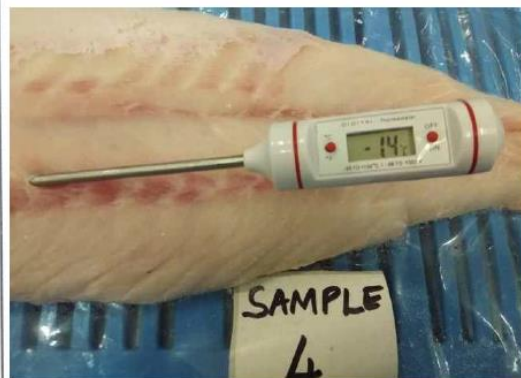

|                         |         |
|-------------------------|---------|
| Finish core Temperature | -1.4° C |
| Finish time chilling    | 11:50AM |
| Temperature of freezing | -20° C  |

|                     |                                                                   |                                                                                      |
|---------------------|-------------------------------------------------------------------|--------------------------------------------------------------------------------------|
| Sample No.<br><br>5 | Company name:                                                     | SUPREME PERCH (Bukoba) LTD P.O.Box 1188 Bukoba Tanzania                              |
|                     | Product information                                               | Chilled Nile perch fillet ( <i>Lates niloticus</i> )                                 |
|                     | Presentation form                                                 | Individual bagged fillet                                                             |
|                     | Batch No.                                                         | 0323718                                                                              |
|                     | Date of sampling                                                  | 05.06.2018                                                                           |
|                     | Type of freezer                                                   | Blast freezer                                                                        |
|                     | Name of the independent controller<br>Controller and organization | Director of Fisheries Division, Ministry of Agriculture, Livestock<br>and Fisheries. |

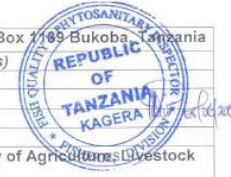

START: Before entering the chilling room

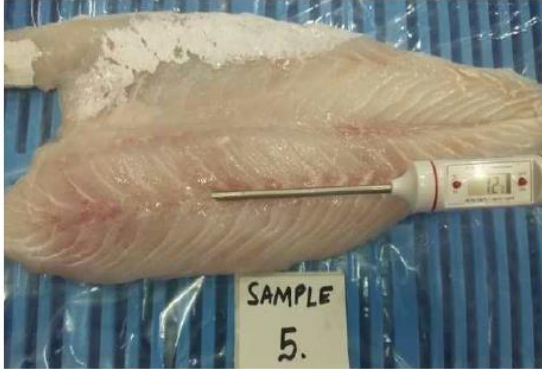

|                         |         |
|-------------------------|---------|
| Start core Temperature  | +1.2° C |
| Start time chilling     | 11:10AM |
| Temperature of freezing | - 20° C |

STOP: After exiting the chilling room

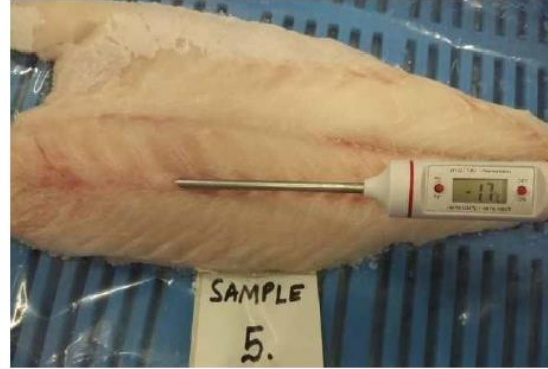

|                         |          |
|-------------------------|----------|
| Finish core Temperature | - 1.7° C |
| Finish time chilling    | 11:55AM  |
| Temperature of freezing | -20° C   |

|                     |                                                                   |                                                                                      |
|---------------------|-------------------------------------------------------------------|--------------------------------------------------------------------------------------|
| Sample No.<br><br>6 | Company name:                                                     | SUPREME PERCH (Bukoba) LTD P.O.Box 1188 Bukoba Tanzania                              |
|                     | Product information                                               | Chilled Nile perch fillet ( <i>Lates niloticus</i> )                                 |
|                     | Presentation form                                                 | Individual bagged fillet                                                             |
|                     | Batch No.                                                         | 0323718                                                                              |
|                     | Date of sampling                                                  | 05.06.2018                                                                           |
|                     | Type of freezer                                                   | Blast freezer                                                                        |
|                     | Name of the independent controller<br>Controller and organization | Director of Fisheries Division, Ministry of Agriculture, Livestock<br>and Fisheries. |

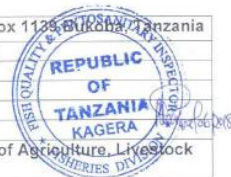

START: Before entering the chilling room

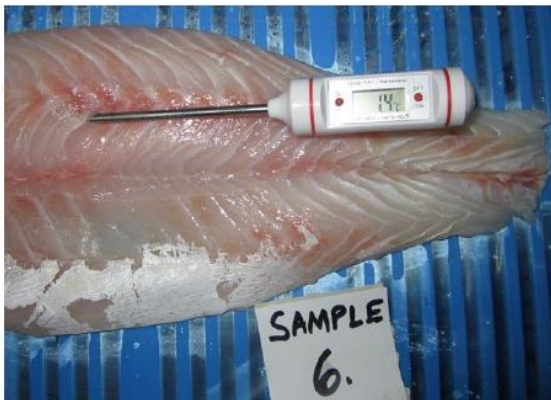

|                         |         |
|-------------------------|---------|
| Start core Temperature  | +1.4° C |
| Start time chilling     | 11:10AM |
| Temperature of freezing | - 20° C |

STOP: After exiting the chilling room

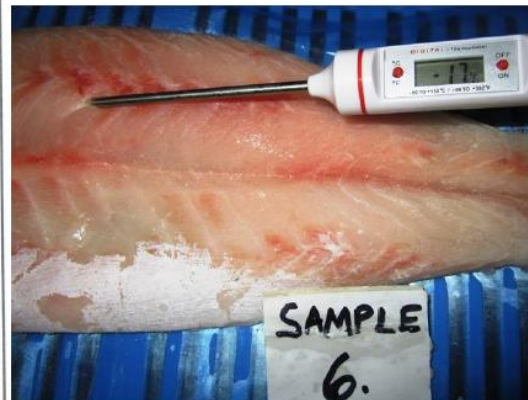

|                         |         |
|-------------------------|---------|
| Finish core Temperature | -1.7° C |
| Finish time chilling    | 11:55AM |
| Temperature of freezing | -20° C  |

|                        |                                                             |                                                                                           |
|------------------------|-------------------------------------------------------------|-------------------------------------------------------------------------------------------|
| Sample No.<br><b>1</b> | <b>Company name</b>                                         | Fresh Perch Limited P.O Box 671, Entebbe - Uganda                                         |
|                        | <b>Product information</b>                                  | Chilled Nile perch fillet ( <i>Lates niloticus</i> )                                      |
|                        | <b>Presentation form</b>                                    | Individually bagged fillet                                                                |
|                        | <b>Batch No.</b>                                            | C-2218-0113126                                                                            |
|                        | <b>Date of sampling</b>                                     | 30.05. 2018                                                                               |
|                        | <b>Type of freezer</b>                                      | Blast freezer                                                                             |
|                        | <b>Name of the independent controller and organization.</b> | Directorate of Fisheries Resource ( Ministry of Agriculture, Animal Industry & Fisheries) |



**START: Before entering the Chilling room**

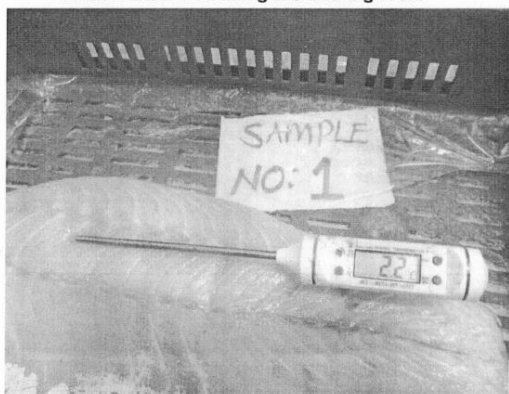

|                                |          |
|--------------------------------|----------|
| <b>Start core Temperature</b>  | +2.2 ° C |
| <b>Start time chilling</b>     | 08.13 am |
| <b>Temperature of freezing</b> | -25 ° C  |

**STOP: After exiting the Chilling room**



|                                |          |
|--------------------------------|----------|
| <b>Finish core Temperature</b> | -1.8° C  |
| <b>Finish time chilling</b>    | 08.50 am |
| <b>Temperature of freezing</b> | -25 ° C  |

|                        |                                           |                                                                                           |
|------------------------|-------------------------------------------|-------------------------------------------------------------------------------------------|
| Sample No.<br><b>2</b> | <b>Company name</b>                       | Fresh Perch Limited P.O Box 671, Entebbe - Uganda                                         |
|                        | <b>Product information</b>                | Chilled Nile perch fillet ( <i>Lates niloticus</i> )                                      |
|                        | <b>Presentation form</b>                  | Individually bagged fillet                                                                |
|                        | <b>Batch No.</b>                          | C-2218-0113126                                                                            |
|                        | <b>Date of sampling</b>                   | 30.05. 2018                                                                               |
|                        | <b>Type of freezer</b>                    | Blast freezer                                                                             |
|                        | <b>Name of the independent controller</b> | Directorate of Fisheries Resource ( Ministry of Agriculture, Animal Industry & Fisheries) |



**START: Before entering the Chilling room**

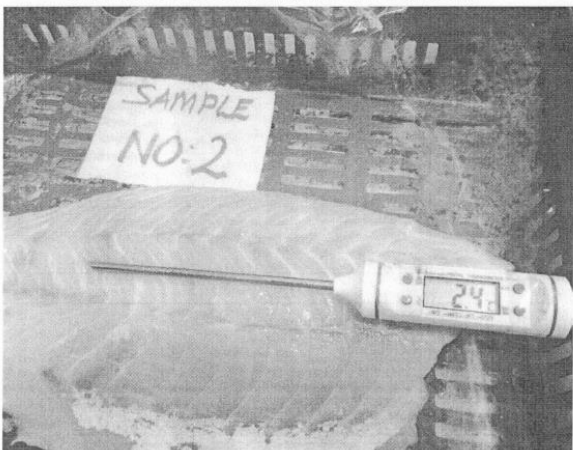

|                                |          |
|--------------------------------|----------|
| <b>Start core Temperature</b>  | +2.4 ° C |
| <b>Start time chilling</b>     | 08.13 am |
| <b>Temperature of freezing</b> | -25 ° C  |

**STOP: After exiting the Chilling room**

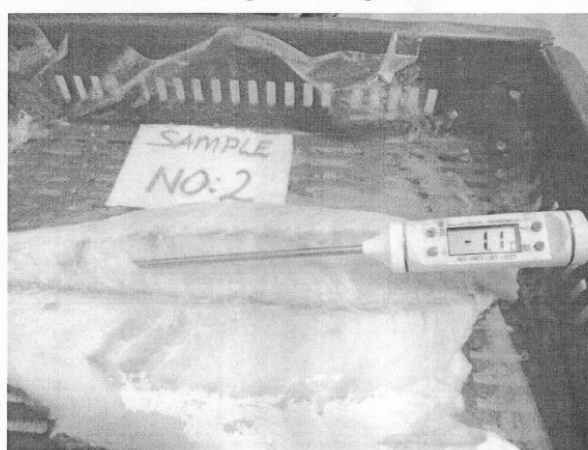

|                                |          |
|--------------------------------|----------|
| <b>Finish core Temperature</b> | -1.1° C  |
| <b>Finish time chilling</b>    | 08.50 am |
| <b>Temperature of freezing</b> | -25 ° C  |

|                        |                                           |                                                                                           |
|------------------------|-------------------------------------------|-------------------------------------------------------------------------------------------|
| Sample No.<br><b>3</b> | <b>Company name</b>                       | Fresh Perch Limited P.O Box 671, Entebbe - Uganda                                         |
|                        | <b>Product information</b>                | Chilled Nile perch fillet ( <i>Lates niloticus</i> )                                      |
|                        | <b>Presentation form</b>                  | Individually bagged fillet                                                                |
|                        | <b>Batch No.</b>                          | C-2218-0113126                                                                            |
|                        | <b>Date of sampling</b>                   | 30.05. 2018                                                                               |
|                        | <b>Type of freezer</b>                    | Blast freezer                                                                             |
|                        | <b>Name of the independent controller</b> | Directorate of Fisheries Resource ( Ministry of Agriculture, Animal Industry & Fisheries) |

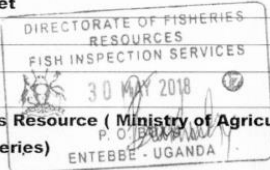

**START: Before entering the Chilling room**

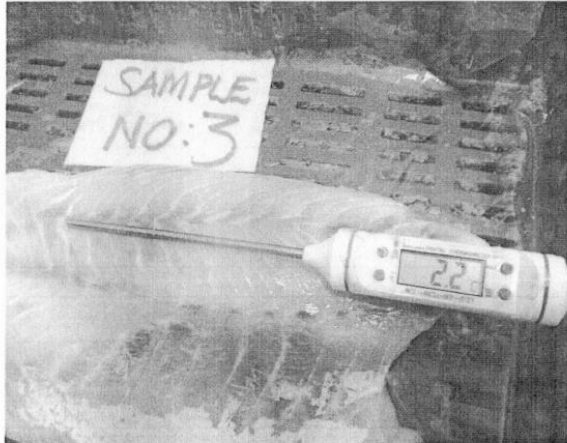

|                         |          |
|-------------------------|----------|
| Start core Temperature  | +2.2 ° C |
| Start time chilling     | 08.15 am |
| Temperature of freezing | -25 ° C  |

**STOP: After exiting the Chilling room**

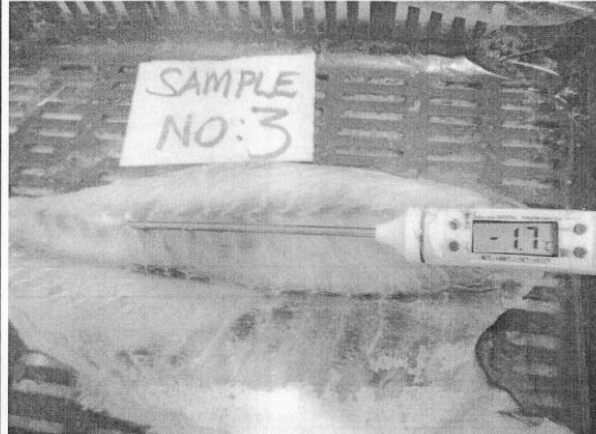

|                         |          |
|-------------------------|----------|
| Finish core Temperature | -1.7° C  |
| Finish time chilling    | 08.52 am |
| Temperature of freezing | -25 ° C  |

|                        |                                           |                                                                                           |
|------------------------|-------------------------------------------|-------------------------------------------------------------------------------------------|
| Sample No.<br><b>4</b> | <b>Company name</b>                       | Fresh Perch Limited P.O Box 671, Entebbe - Uganda                                         |
|                        | <b>Product information</b>                | Chilled Nile perch fillet ( <i>Lates niloticus</i> )                                      |
|                        | <b>Presentation form</b>                  | Individually bagged fillet                                                                |
|                        | <b>Batch No.</b>                          | C-2218-0113126                                                                            |
|                        | <b>Date of sampling</b>                   | 30.05. 2018                                                                               |
|                        | <b>Type of freezer</b>                    | Blast freezer                                                                             |
|                        | <b>Name of the independent controller</b> | Directorate of Fisheries Resource ( Ministry of Agriculture, Animal Industry & Fisheries) |

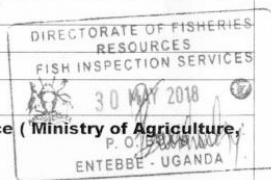

**START: Before entering the Chilling room**

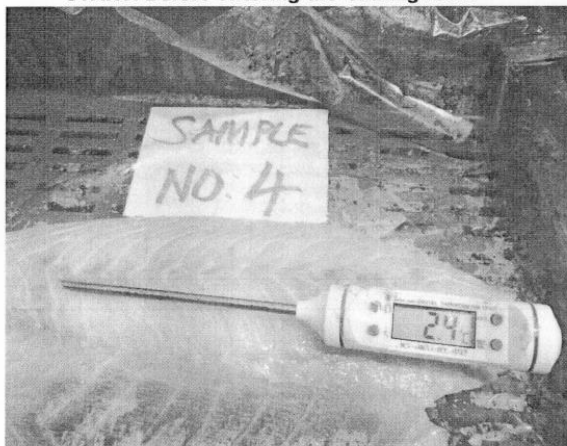

|                         |          |
|-------------------------|----------|
| Start core Temperature  | +2.4 ° C |
| Start time chilling     | 08.15 am |
| Temperature of freezing | -25 ° C  |

**STOP: After exiting the Chilling room**

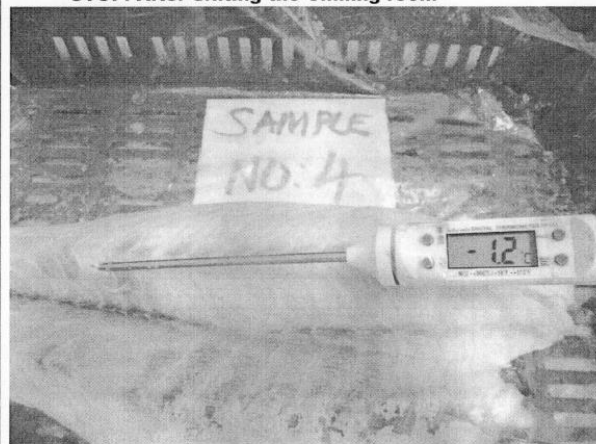

|                         |          |
|-------------------------|----------|
| Finish core Temperature | -1.2° C  |
| Finish time chilling    | 08.52 am |
| Temperature of freezing | -25 ° C  |

|                        |                                           |                                                                                           |
|------------------------|-------------------------------------------|-------------------------------------------------------------------------------------------|
| Sample No.<br><b>5</b> | <b>Company name</b>                       | Fresh Perch Limited P.O Box 671, Entebbe - Uganda                                         |
|                        | <b>Product information</b>                | Chilled Nile perch fillet ( <i>Lates niloticus</i> )                                      |
|                        | <b>Presentation form</b>                  | Individually bagged fillet                                                                |
|                        | <b>Batch No.</b>                          | C-2218-0113126                                                                            |
|                        | <b>Date of sampling</b>                   | 30.05. 2018                                                                               |
|                        | <b>Type of freezer</b>                    | Blast freezer                                                                             |
|                        | <b>Name of the independent controller</b> | Directorate of Fisheries Resource ( Ministry of Agriculture, Animal Industry & Fisheries) |

DIRECTORATE OF FISHERIES RESOURCES  
 FISH INSPECTION SERVICES  
 30 MAY 2018  
 P. O. BOX 4  
 ENTEBBE - UGANDA

**START: Before entering the Chilling room**

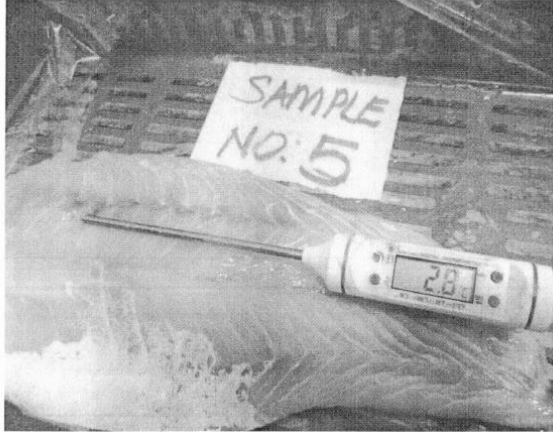

|                         |          |
|-------------------------|----------|
| Start core Temperature  | +2.8 ° C |
| Start time chilling     | 08.17 am |
| Temperature of freezing | -25 ° C  |

**STOP: After exiting the Chilling room**

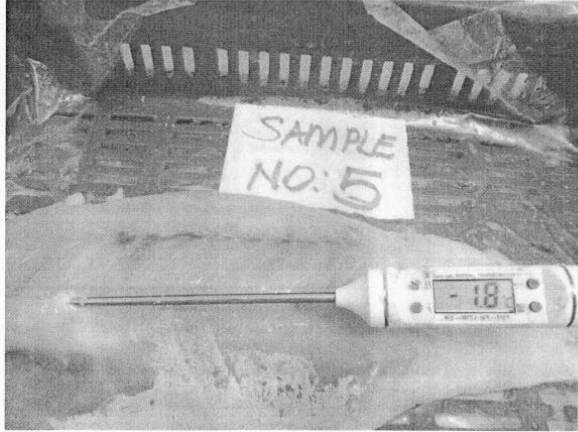

|                         |          |
|-------------------------|----------|
| Finish core Temperature | -1.8 ° C |
| Finish time chilling    | 08.55 am |
| Temperature of freezing | -25 ° C  |

|                        |                                           |                                                                                           |
|------------------------|-------------------------------------------|-------------------------------------------------------------------------------------------|
| Sample No.<br><b>6</b> | <b>Company name</b>                       | Fresh Perch Limited P.O Box 671, Entebbe - Uganda                                         |
|                        | <b>Product information</b>                | Chilled Nile perch fillet ( <i>Lates niloticus</i> )                                      |
|                        | <b>Presentation form</b>                  | Individually bagged fillet                                                                |
|                        | <b>Batch No.</b>                          | C-2218-0113126                                                                            |
|                        | <b>Date of sampling</b>                   | 30.05. 2018                                                                               |
|                        | <b>Type of freezer</b>                    | Blast freezer                                                                             |
|                        | <b>Name of the independent controller</b> | Directorate of Fisheries Resource ( Ministry of Agriculture, Animal Industry & Fisheries) |

DIRECTORATE OF FISHERIES RESOURCES  
 FISH INSPECTION SERVICES  
 30 MAY 2018  
 P. O. BOX 4  
 ENTEBBE - UGANDA

**START: Before entering the Chilling room**

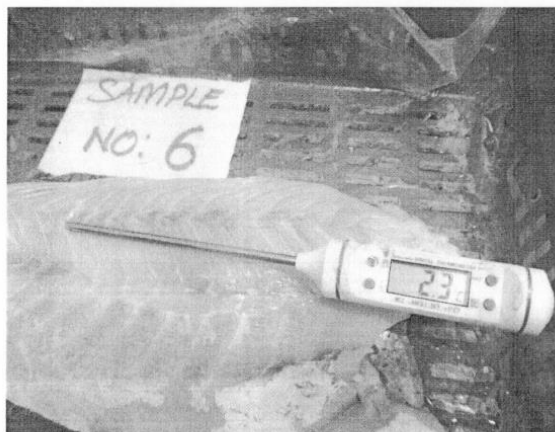

|                         |          |
|-------------------------|----------|
| Start core Temperature  | +2.3 ° C |
| Start time chilling     | 08.17 am |
| Temperature of freezing | -25 ° C  |

**STOP: After exiting the Chilling room**

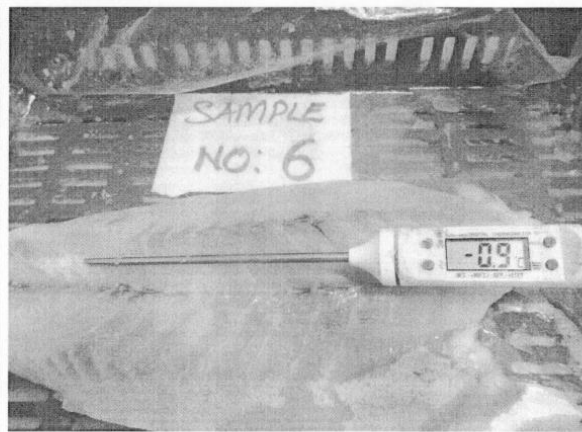

|                         |          |
|-------------------------|----------|
| Finish core Temperature | -0.9 ° C |
| Finish time chilling    | 08.55 am |
| Temperature of freezing | -25 ° C  |



East African Sea Food Ltd.

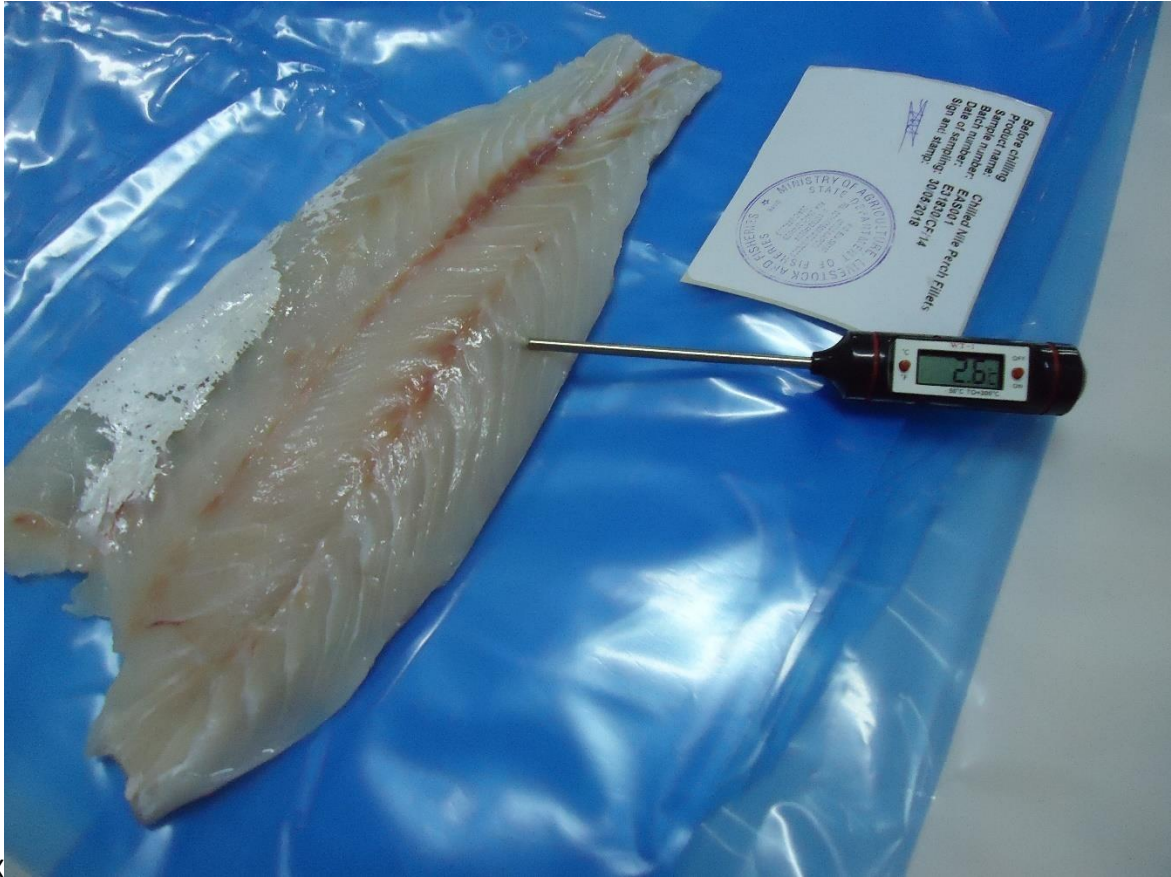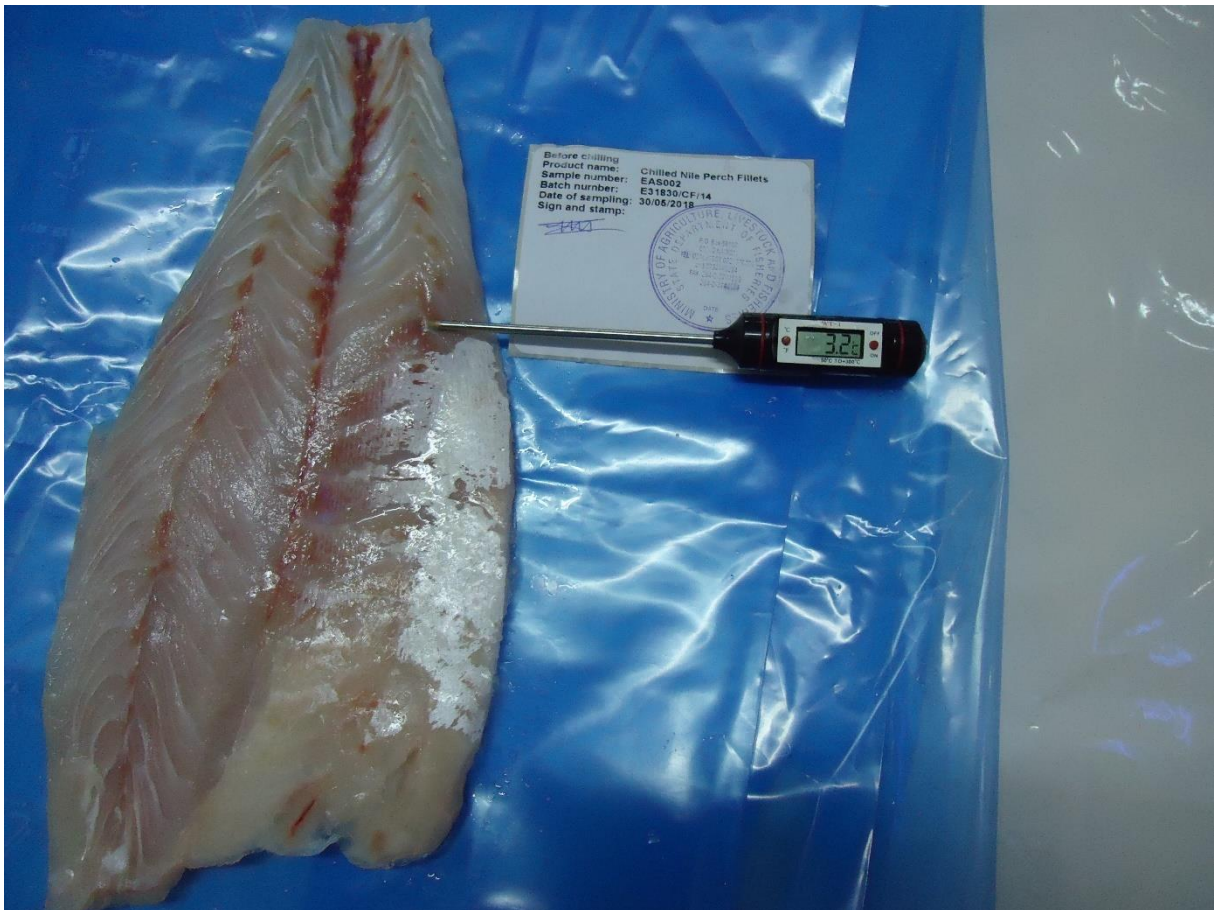

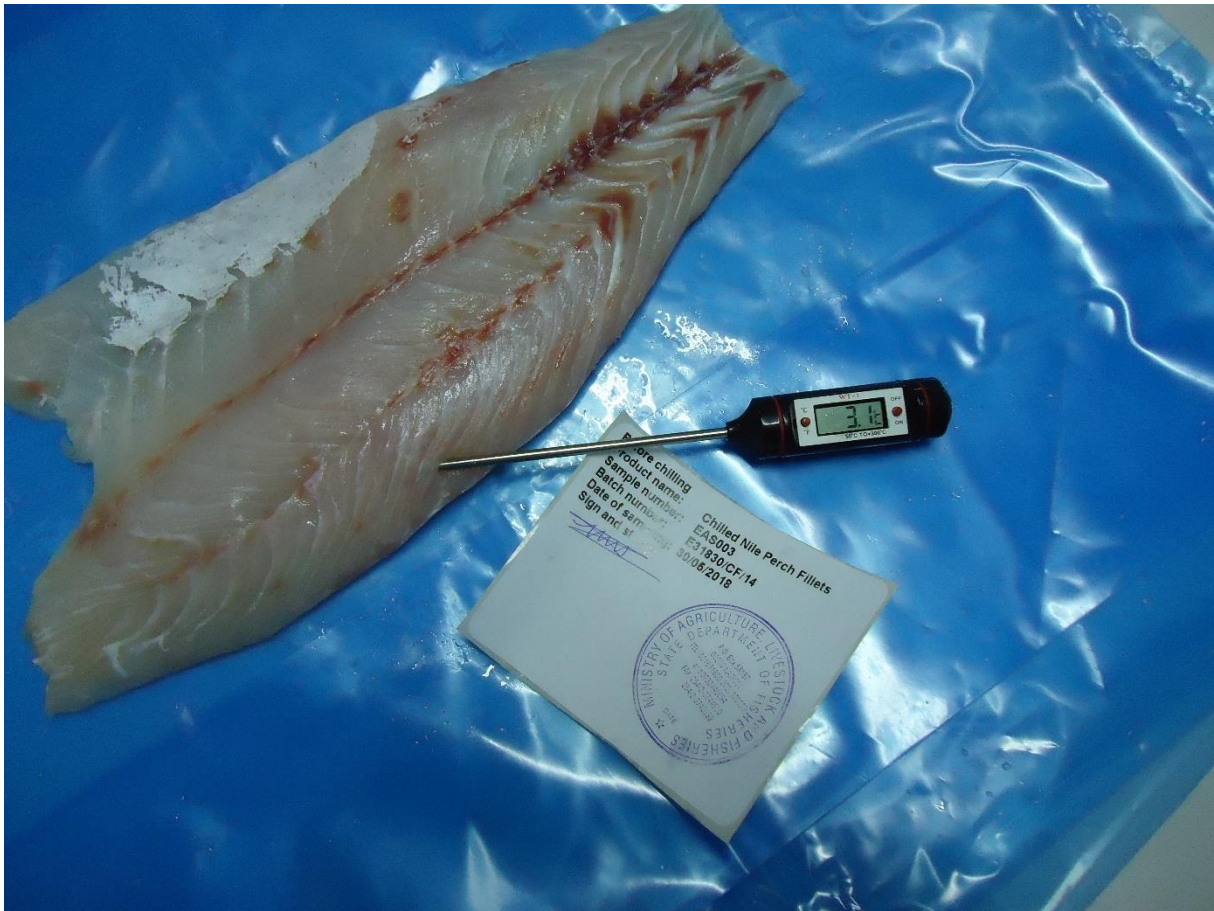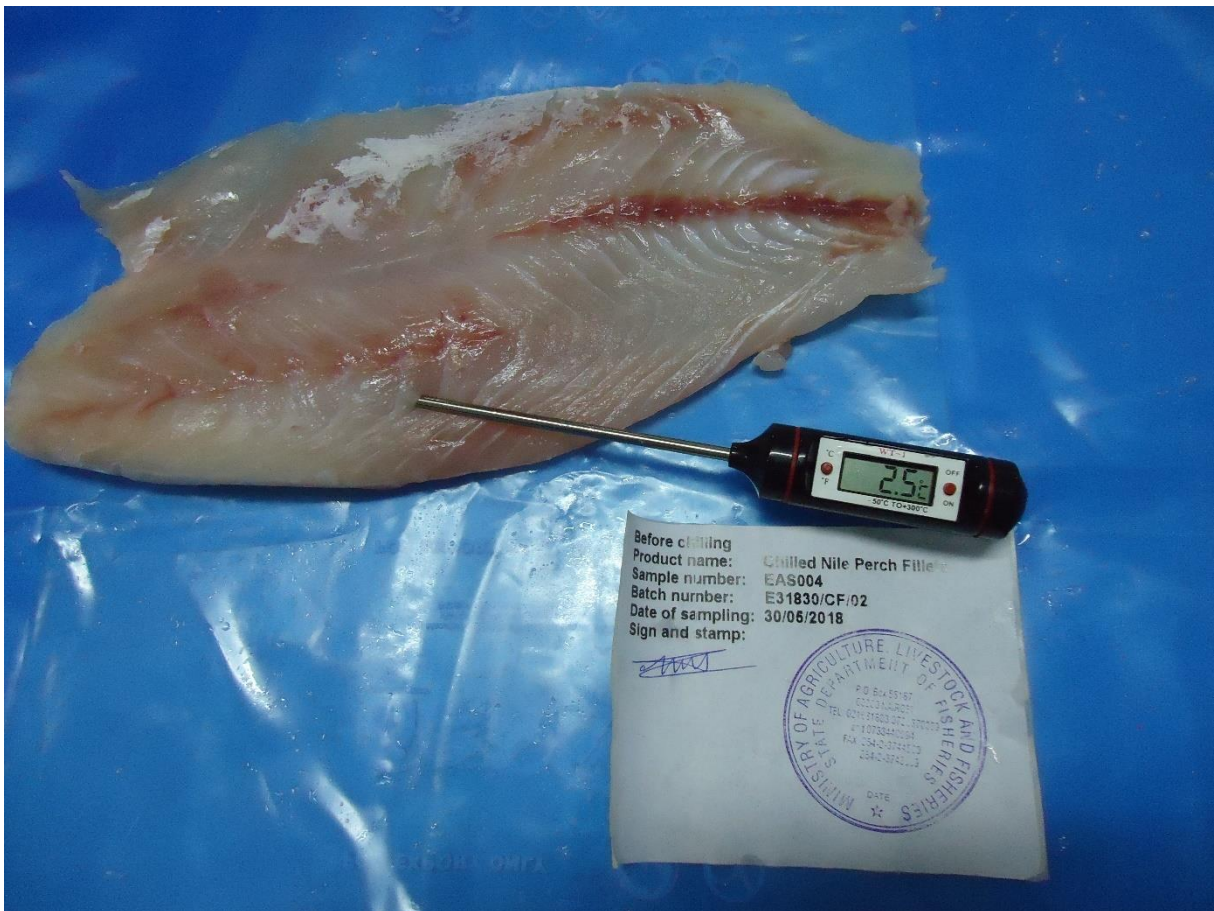

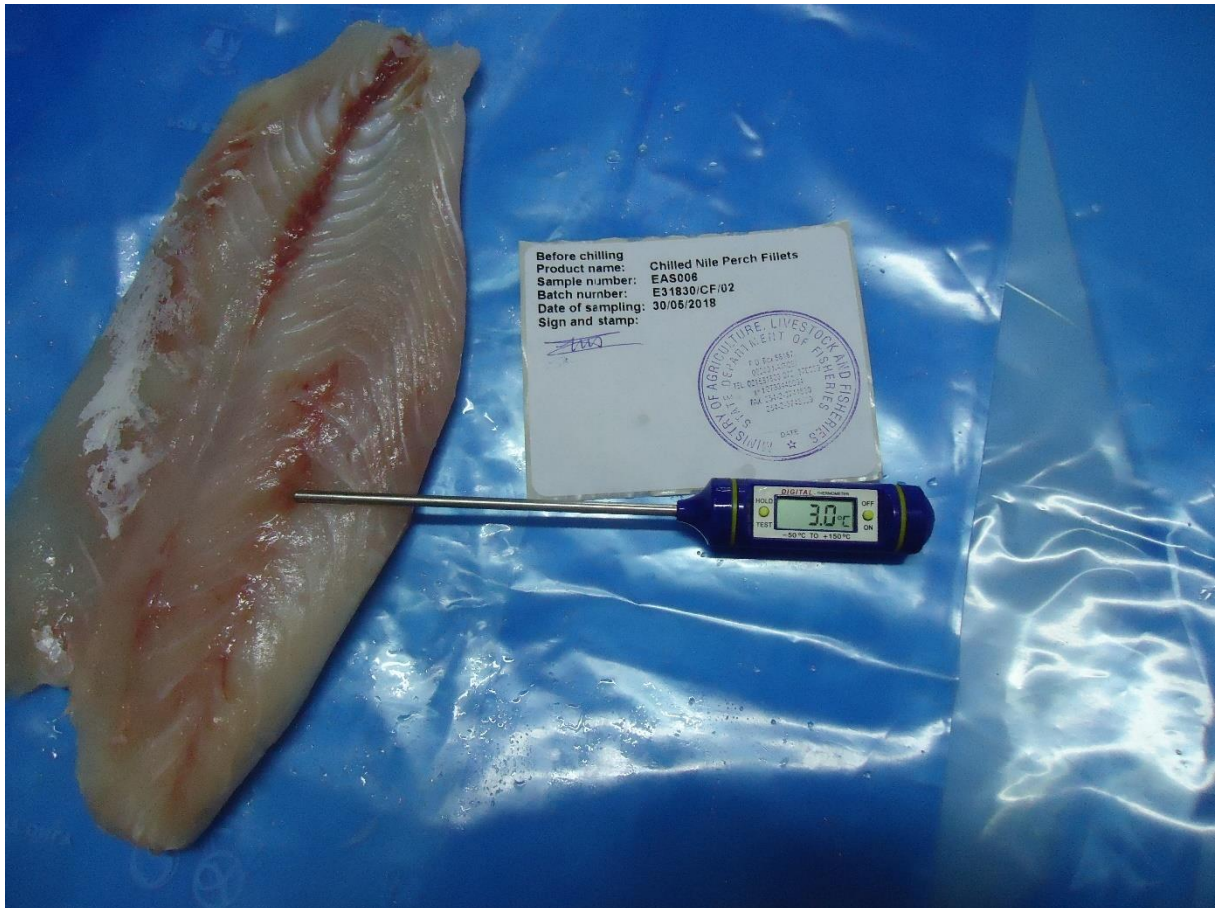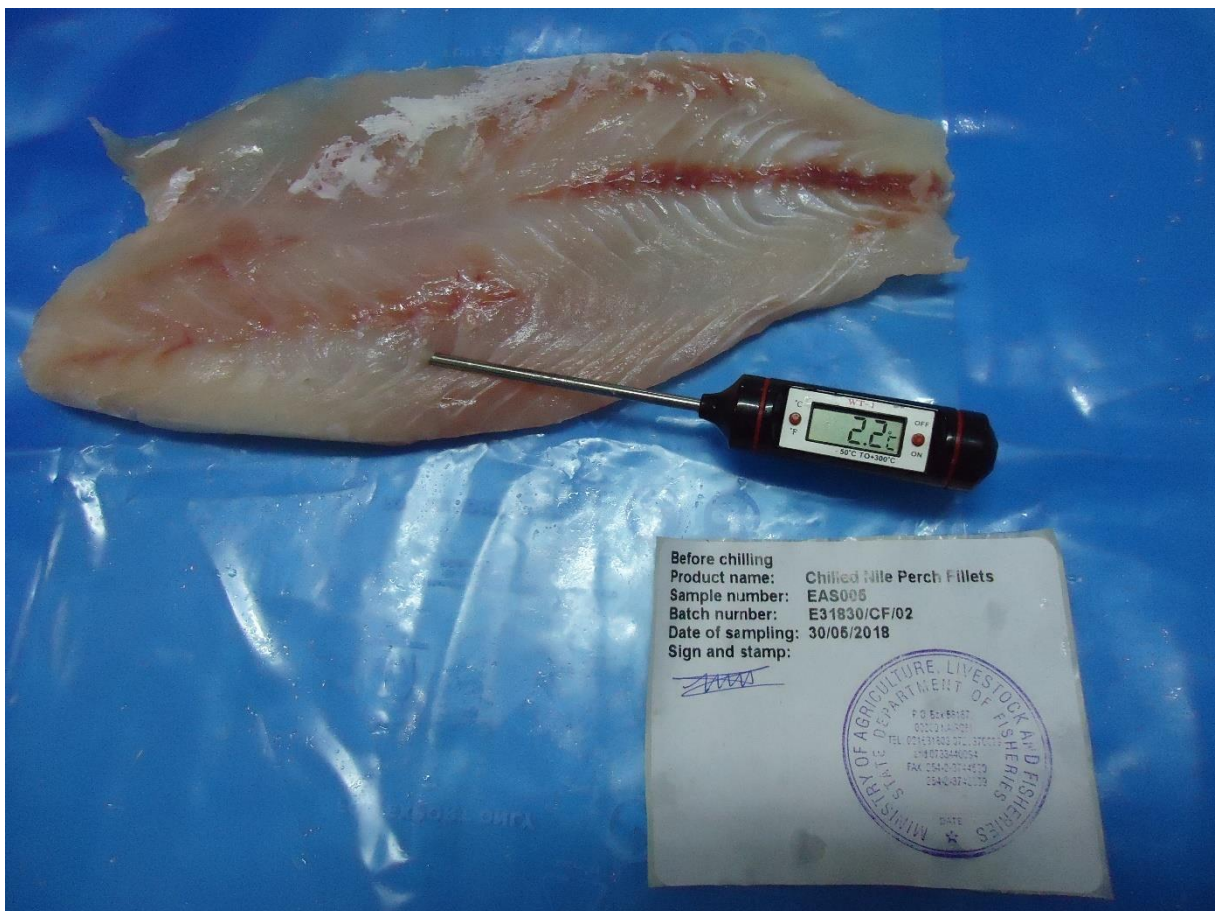

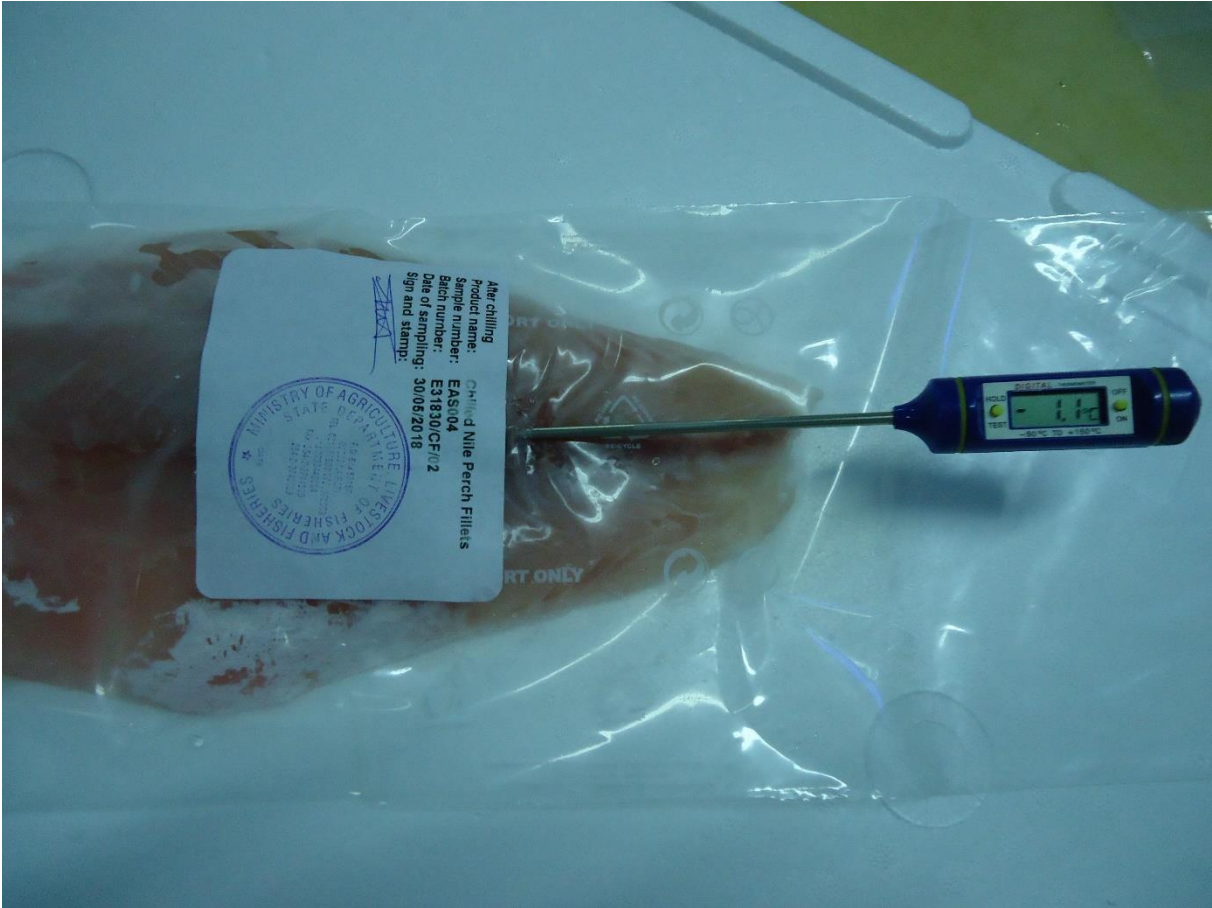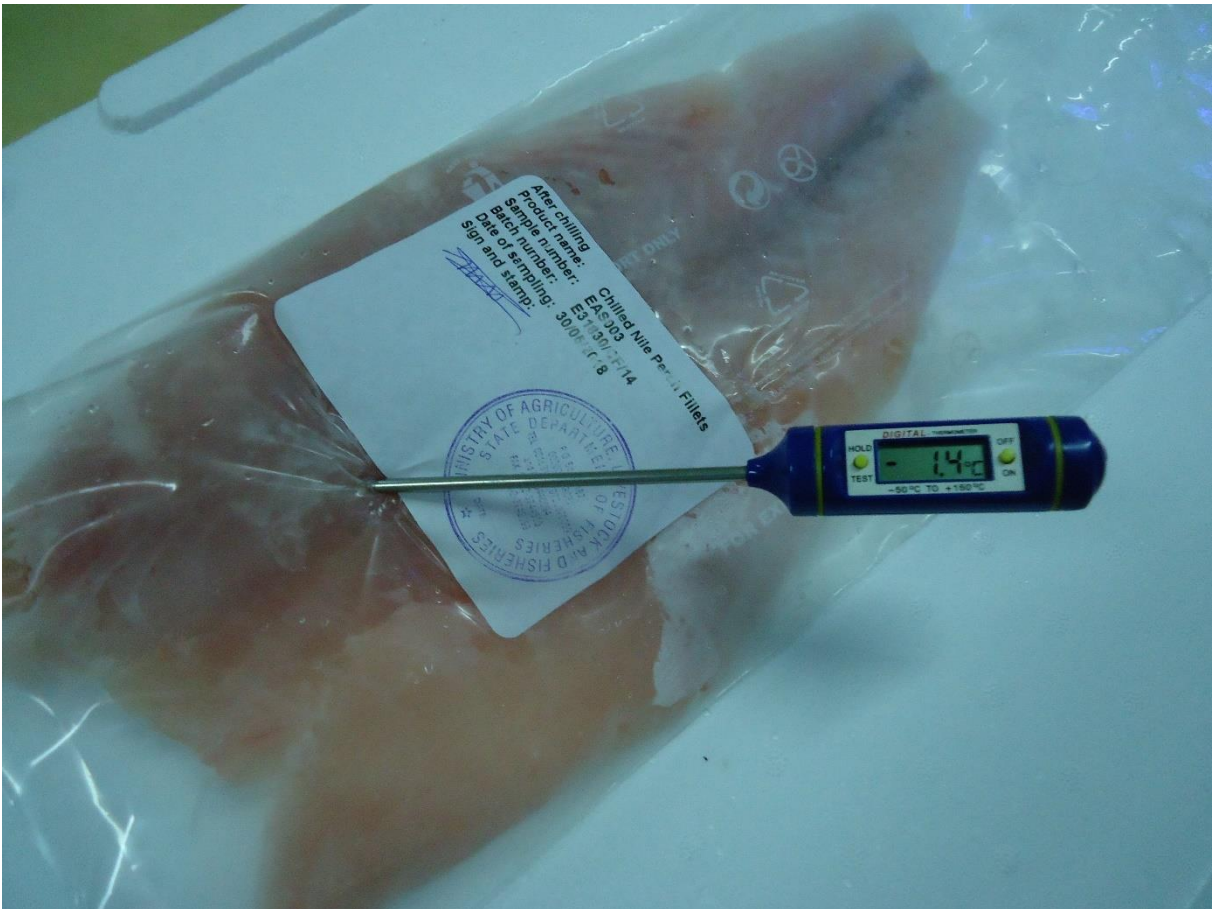

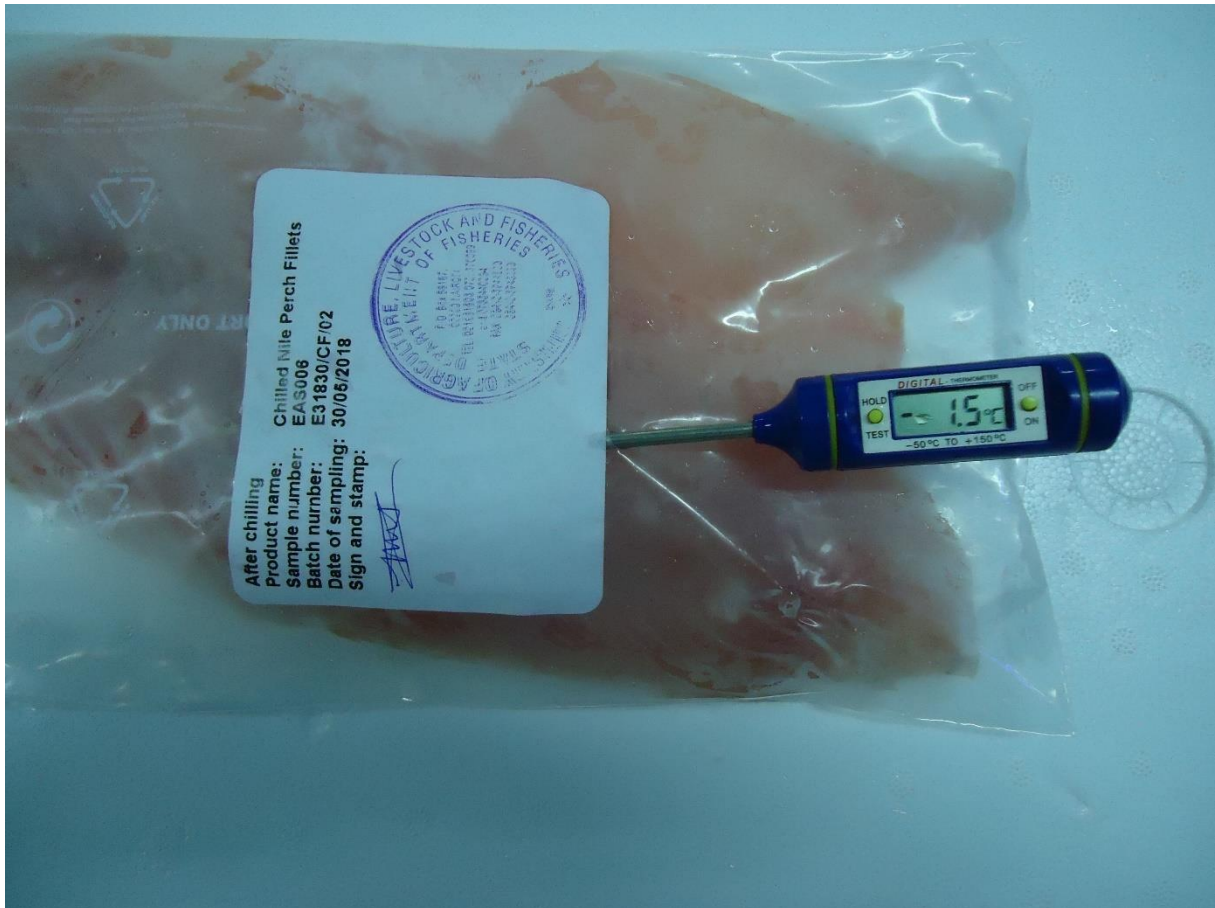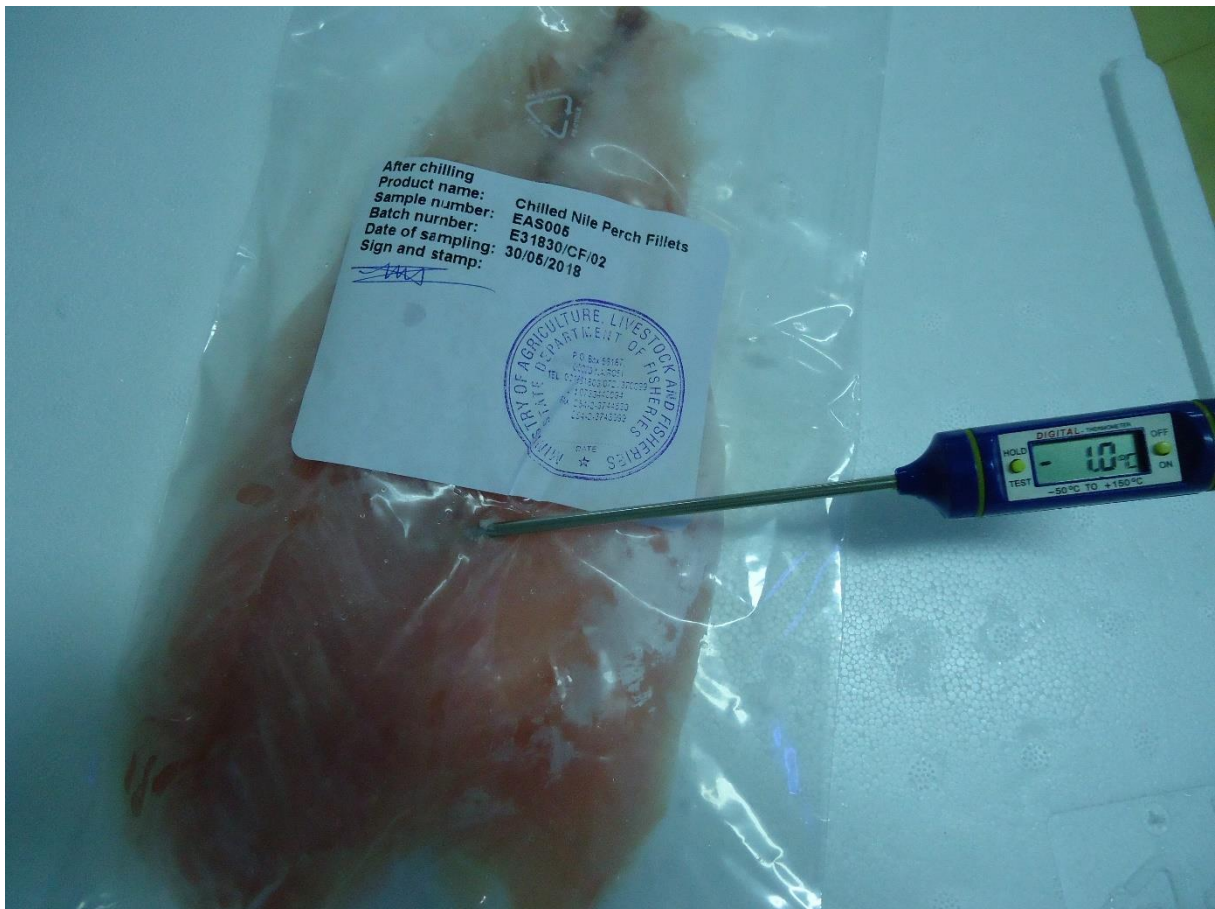

Karmic Foods Ltd.

| SAMPLE NO. 01                                        |                                                                                                         |
|------------------------------------------------------|---------------------------------------------------------------------------------------------------------|
| COMPANY NAME                                         | KARMIC FOODS LIMITED (EAN U10/06), PLOT 8-13, OFF ENTEBBE ROAD, ENTEBBE, P.O.BOX:27929, KAMPALA, UGANDA |
| PRODUCT INFORMATION                                  | CHILLED NILE PERCH FILLETS ( <i>Lates niloticus</i> )                                                   |
| PRESENTATION FORM                                    | INDIVIDUALLY BAGGED FILLETS                                                                             |
| BATCH NUMBER                                         | K18150A72401                                                                                            |
| DATE OF SAMPLING                                     | 30.05.2018                                                                                              |
| TYPE OF FREEZER                                      | BLAST CHILLER                                                                                           |
| NAME OF THE INDEPENDENT CONTROLLER AND ORGANIZATION. | Directorate of Fisheries Resource ( Ministry of Agriculture, Animal Industry & Fisheries)               |

**START: Before entering the Blast Chiller**

**STOP: After exiting the Blast Chiller**

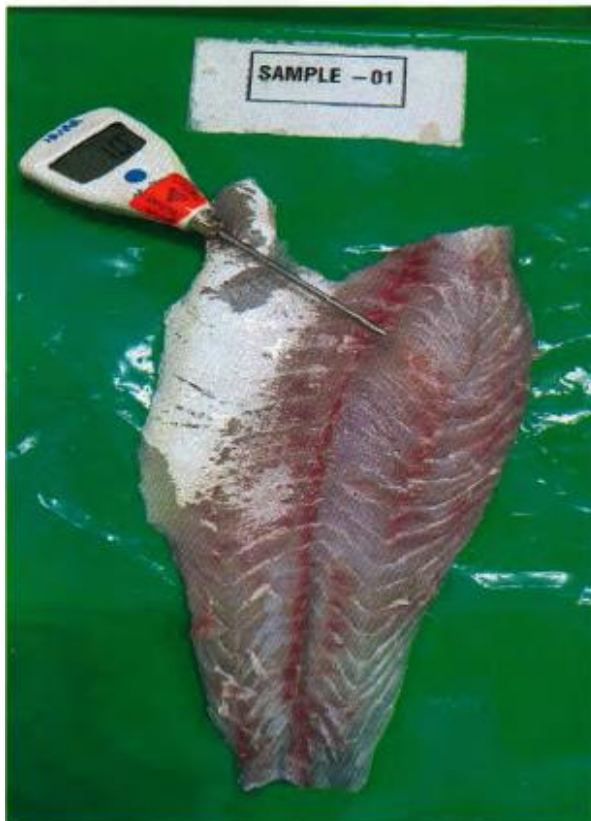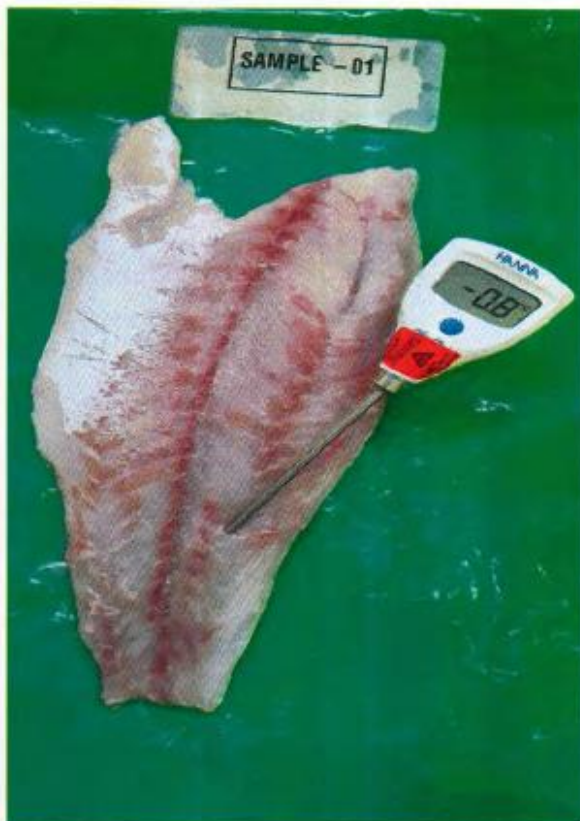

|                         |          |
|-------------------------|----------|
| Start core Temperature  | +1.0°C   |
| Start time chilling     | 12:30 PM |
| Temperature of freezing | -20°C    |

|                           |         |
|---------------------------|---------|
| Finished core Temperature | -0.8°C  |
| Finish time chilling      | 1:00 PM |
| Temperature of freezing   | -20°C   |

Signature & Stamp (Competent Authority):-

*[Handwritten Signature]*

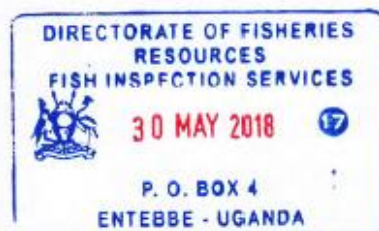

| SAMPLE NO. 02                                        |                                                                                                         |
|------------------------------------------------------|---------------------------------------------------------------------------------------------------------|
| COMPANY NAME                                         | KARMIC FOODS LIMITED (EAN U10/06), PLOT 8-13, OFF ENTEBBE ROAD, ENTEBBE, P.O.BOX:27929, KAMPALA, UGANDA |
| PRODUCT INFORMATION                                  | CHILLED NILE PERCH FILLETS ( <i>Lates niloticus</i> )                                                   |
| PRESENTATION FORM                                    | INDIVIDUALLY BAGGED FILLETS                                                                             |
| BATCH NUMBER                                         | K18150A72401                                                                                            |
| DATE OF SAMPLING                                     | 30.05.2018                                                                                              |
| TYPE OF FREEZER                                      | BLAST CHILLER                                                                                           |
| NAME OF THE INDEPENDENT CONTROLLER AND ORGANIZATION. | Directorate of Fisheries Resource ( Ministry of Agriculture, Animal Industry & Fisheries)               |

**START: Before entering the Blast Chiller**

**STOP: After exiting the Blast Chiller**

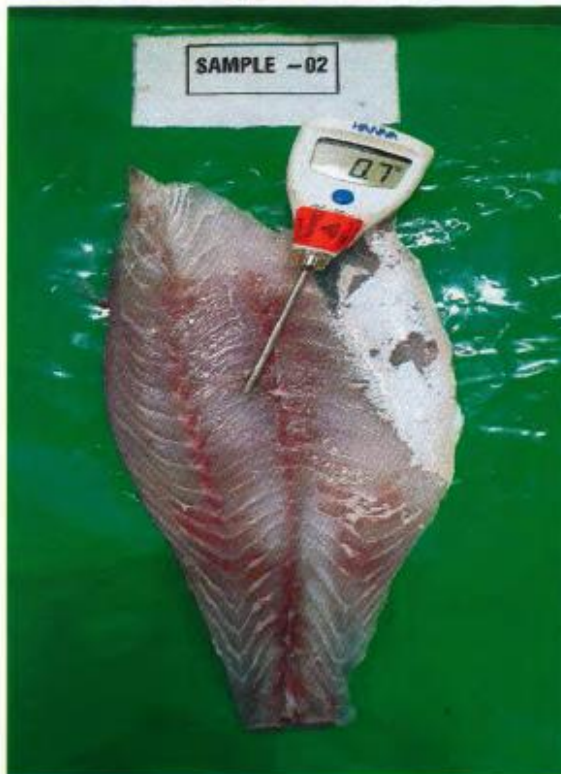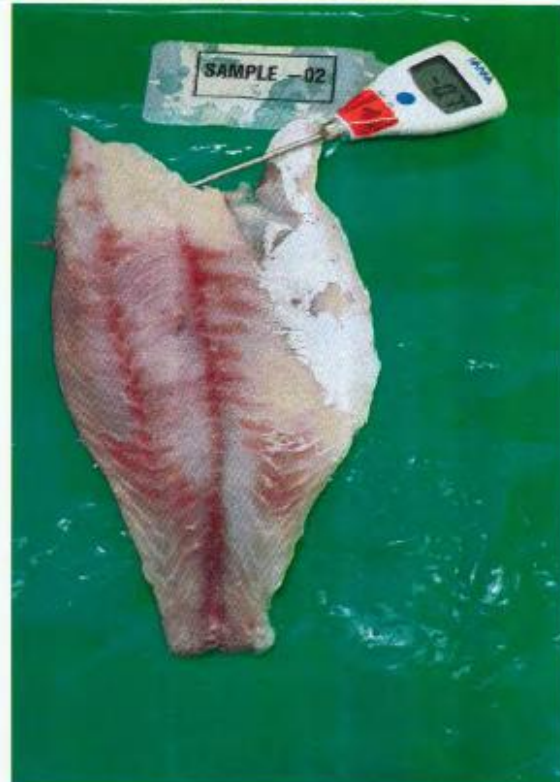

|                         |          |
|-------------------------|----------|
| Start core Temperature  | +0.7°C   |
| Start time chilling     | 12:35 PM |
| Temperature of freezing | -20°C    |

|                           |         |
|---------------------------|---------|
| Finished core Temperature | -0.7°C  |
| Finish time chilling      | 1:05 PM |
| Temperature of freezing   | -20°C   |

Signature & Stamp (Competent Authority):-

*Signature*

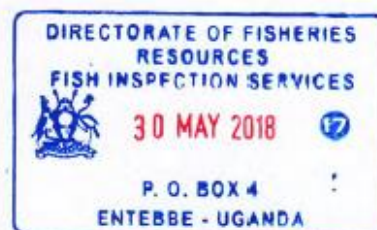

| SAMPLE NO. 03                                        |                                                                                                         |
|------------------------------------------------------|---------------------------------------------------------------------------------------------------------|
| COMPANY NAME                                         | KARMIC FOODS LIMITED (EAN U10/06), PLOT 8-13, OFF ENTEBBE ROAD, ENTEBBE, P.O.BOX:27929, KAMPALA, UGANDA |
| PRODUCT INFORMATION                                  | CHILLED NILE PERCH FILLETS ( <i>Lates niloticus</i> )                                                   |
| PRESENTATION FORM                                    | INDIVIDUALLY BAGGED FILLETS                                                                             |
| BATCH NUMBER                                         | K18150A72401                                                                                            |
| DATE OF SAMPLING                                     | 30.05.2018                                                                                              |
| TYPE OF FREEZER                                      | BLAST CHILLER                                                                                           |
| NAME OF THE INDEPENDENT CONTROLLER AND ORGANIZATION. | Directorate of Fisheries Resource ( Ministry of Agriculture, Animal Industry & Fisheries)               |

**START: Before entering the Blast Chiller**

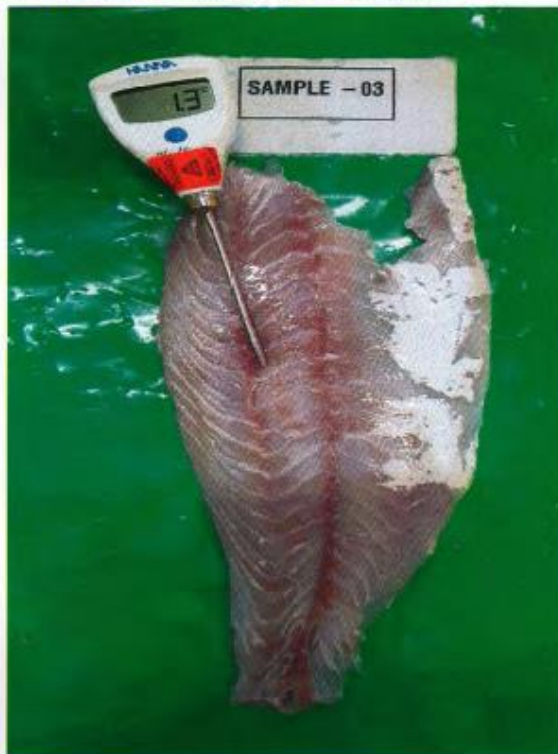

|                         |          |
|-------------------------|----------|
| Start core Temperature  | +1.3°C   |
| Start time chilling     | 12:35 PM |
| Temperature of freezing | -20°C    |

**STOP: After exiting the Blast Chiller**

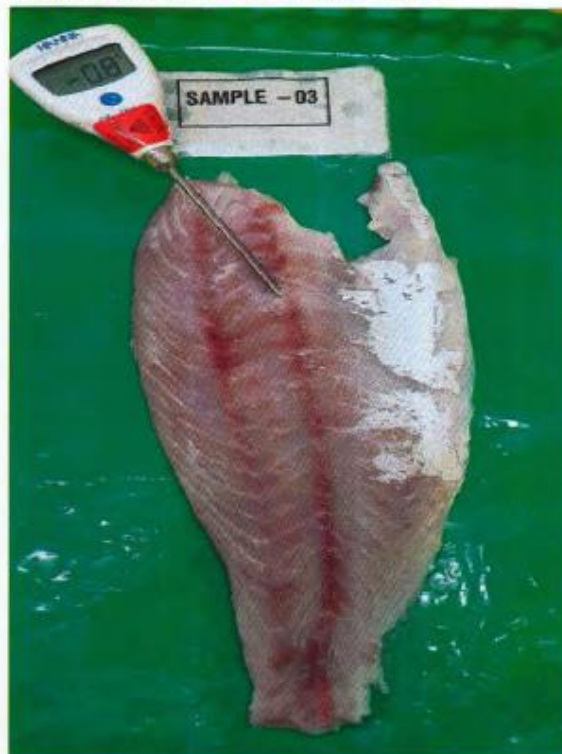

|                           |         |
|---------------------------|---------|
| Finished core Temperature | -0.8°C  |
| Finish time chilling      | 1:05 PM |
| Temperature of freezing   | -20°C   |

Signature & Stamp (Competent Authority):-

*Bawo*

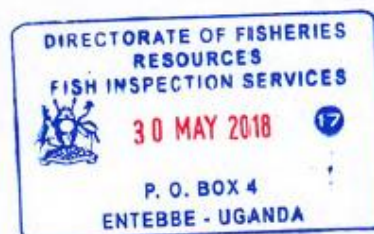



| SAMPLE NO. 04                                        |                                                                                                         |
|------------------------------------------------------|---------------------------------------------------------------------------------------------------------|
| COMPANY NAME                                         | KARMIC FOODS LIMITED (EAN U10/06), PLOT 8-13, OFF ENTEBBE ROAD, ENTEBBE, P.O.BOX:27929, KAMPALA, UGANDA |
| PRODUCT INFORMATION                                  | CHILLED NILE PERCH FILLETS ( <i>Lates niloticus</i> )                                                   |
| PRESENTATION FORM                                    | INDIVIDUALLY BAGGED FILLETS                                                                             |
| BATCH NUMBER                                         | K18150A72401                                                                                            |
| DATE OF SAMPLING                                     | 30.05.2018                                                                                              |
| TYPE OF FREEZER                                      | BLAST CHILLER                                                                                           |
| NAME OF THE INDEPENDENT CONTROLLER AND ORGANIZATION. | Directorate of Fisheries Resource ( Ministry of Agriculture, Animal Industry & Fisheries)               |

**START: Before entering the Blast Chiller**

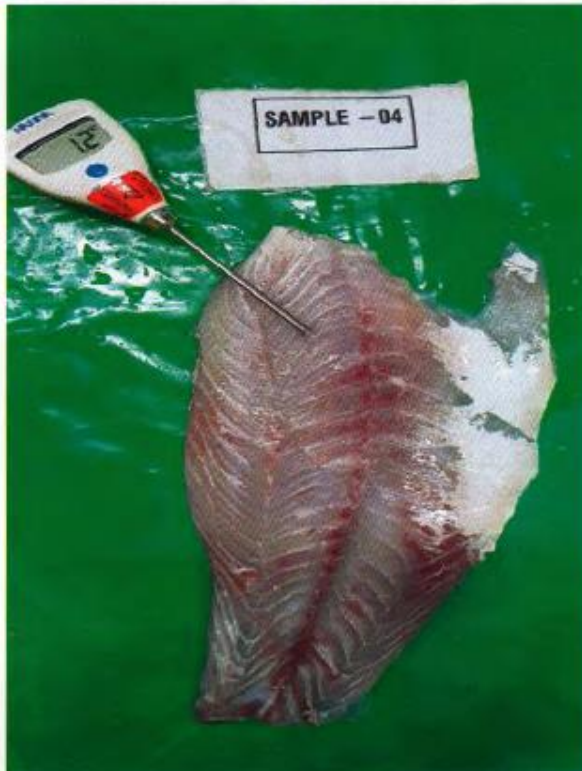

|                         |          |
|-------------------------|----------|
| Start core Temperature  | +1.2°C   |
| Start time chilling     | 12:35 PM |
| Temperature of freezing | -20°C    |

**STOP: After exiting the Blast Chiller**

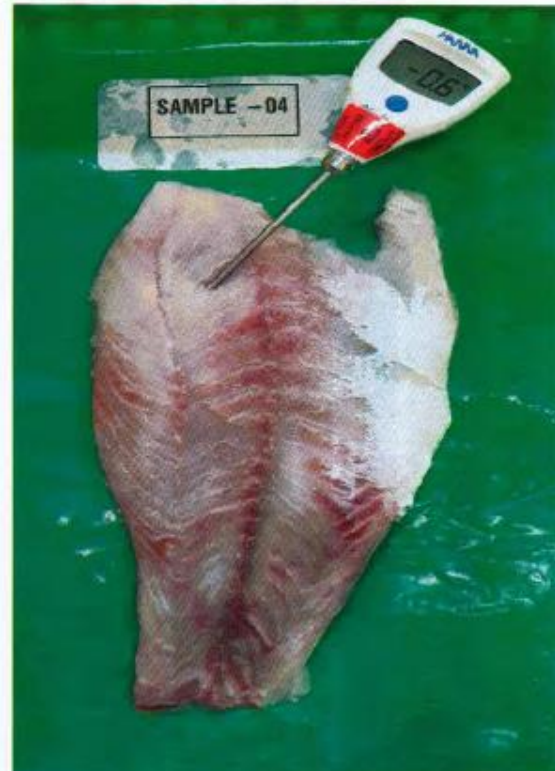

|                           |         |
|---------------------------|---------|
| Finished core Temperature | -0.6°C  |
| Finish time chilling      | 1: 05PM |
| Temperature of freezing   | -20°C   |

Signature & Stamp (Competent Authority):- \_\_\_\_\_ *Bandy*

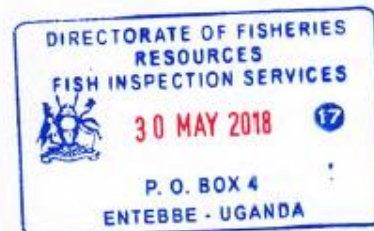

**SAMPLE NO. 05**

|                                                             |                                                                                                         |
|-------------------------------------------------------------|---------------------------------------------------------------------------------------------------------|
| <b>COMPANY NAME</b>                                         | KARMIC FOODS LIMITED (EAN U10/06), PLOT 8-13, OFF ENTEBBE ROAD, ENTEBBE, P.O.BOX:27929, KAMPALA, UGANDA |
| <b>PRODUCT INFORMATION</b>                                  | CHILLED NILE PERCH FILLETS ( <i>Lates niloticus</i> )                                                   |
| <b>PRESENTATION FORM</b>                                    | INDIVIDUALLY BAGGED FILLETS                                                                             |
| <b>BATCH NUMBER</b>                                         | K18150A72401                                                                                            |
| <b>DATE OF SAMPLING</b>                                     | 30.05.2018                                                                                              |
| <b>TYPE OF FREEZER</b>                                      | BLAST CHILLER                                                                                           |
| <b>NAME OF THE INDEPENDENT CONTROLLER AND ORGANIZATION.</b> | Directorate of Fisheries Resource ( Ministry of Agriculture, Animal Industry & Fisheries)               |

**START: Before entering the Blast Chiller**

**STOP: After exiting the Blast Chiller**

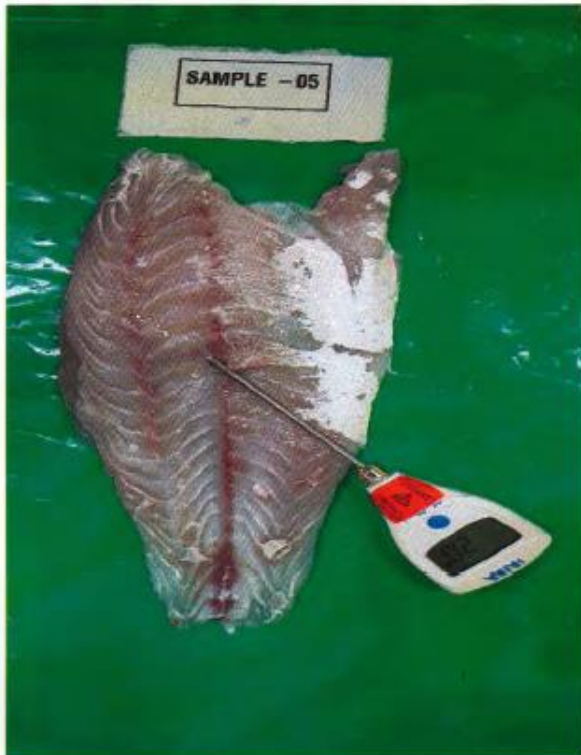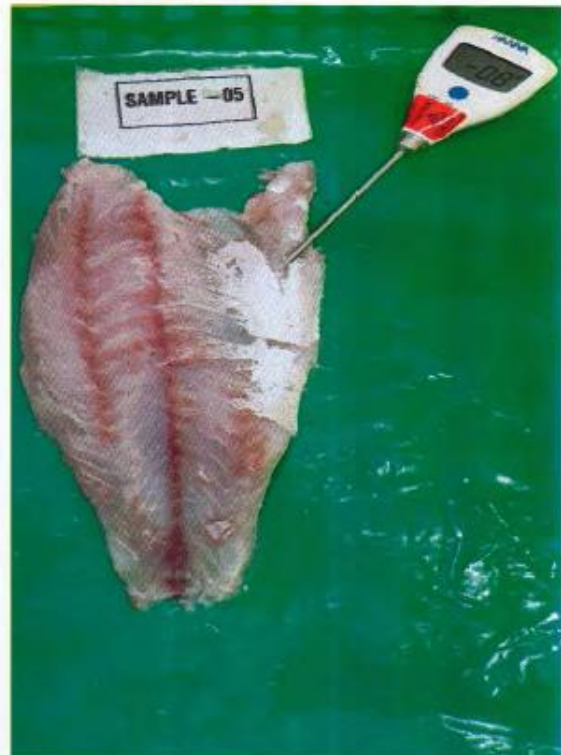

|                                |          |
|--------------------------------|----------|
| <b>Start core Temperature</b>  | +2.0°C   |
| <b>Start time chilling</b>     | 12:40 PM |
| <b>Temperature of freezing</b> | -20°C    |

|                                  |         |
|----------------------------------|---------|
| <b>Finished core Temperature</b> | -0.8°C  |
| <b>Finish time chilling</b>      | 1:10 PM |
| <b>Temperature of freezing</b>   | -20°C   |

Signature & Stamp (Competent Authority):- \_\_\_\_\_

*Bawit*

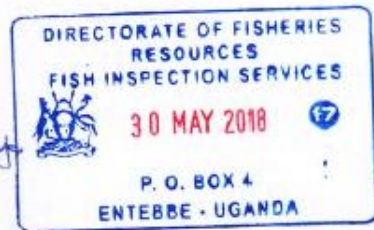

| SAMPLE NO. 06                                        |                                                                                                         |
|------------------------------------------------------|---------------------------------------------------------------------------------------------------------|
| COMPANY NAME                                         | KARMIC FOODS LIMITED (EAN U10/06), PLOT 8-13, OFF ENTEBBE ROAD, ENTEBBE, P.O.BOX:27929, KAMPALA, UGANDA |
| PRODUCT INFORMATION                                  | CHILLED NILE PERCH FILLETS ( <i>Lates niloticus</i> )                                                   |
| PRESENTATION FORM                                    | INDIVIDUALLY BAGGED FILLETS                                                                             |
| BATCH NUMBER                                         | K18150A72401                                                                                            |
| DATE OF SAMPLING                                     | 30.05.2018                                                                                              |
| TYPE OF FREEZER                                      | BLAST CHILLER                                                                                           |
| NAME OF THE INDEPENDENT CONTROLLER AND ORGANIZATION. | Directorate of Fisheries Resource ( Ministry of Agriculture, Animal Industry & Fisheries)               |

**START: Before entering the Blast Chiller**

**STOP: After exiting the Blast Chiller**

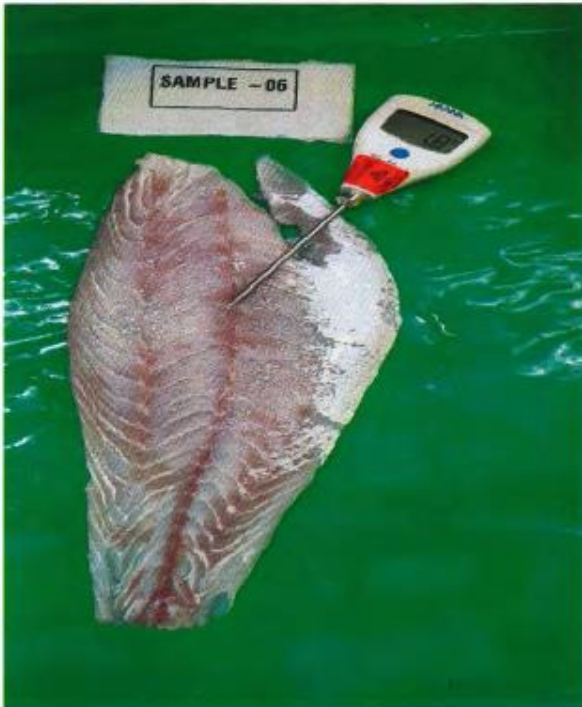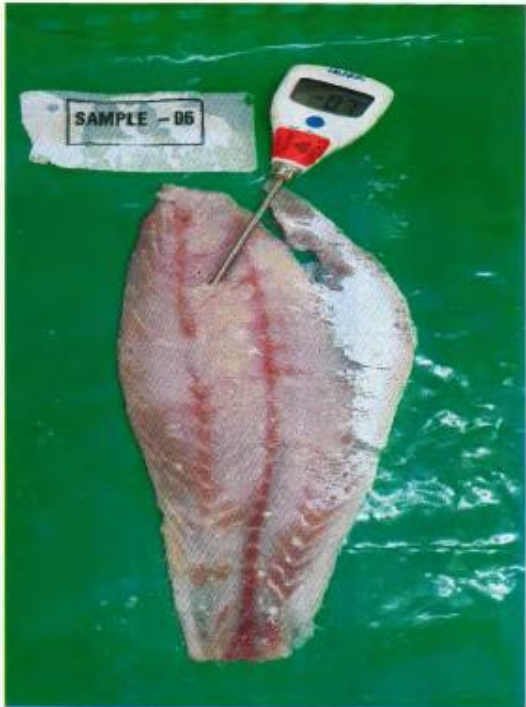

|                         |          |
|-------------------------|----------|
| Start core Temperature  | +1.8°C   |
| Start time chilling     | 12:40 PM |
| Temperature of freezing | -20°C    |

|                           |         |
|---------------------------|---------|
| Finished core Temperature | -0.7°C  |
| Finish time chilling      | 1:10 PM |
| Temperature of freezing   | -20°C   |

Signature & Stamp (Competent Authority):- \_\_\_\_\_

*Signature*

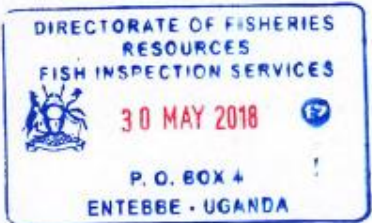

## A1.2 Destination temperature and HADH results RIKILT Wageningen University

In the RIKILT report information about enzymatic HADH activity, but also sample temperatures at destination are given.

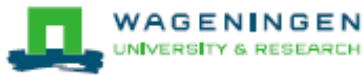

Datum : Augustus 2018

Resultaten van de enzymatische HADH bepaling en temperatuurmetingen in het project superchilled Nijlbaars.

### Enzymatische HADH detrermination :

A common enzymatic method that was initially developed to distinguish fresh from thawed meat is the  $\beta$ -hydroxyacyl-CoA-dehydrogenase method (HADH) (Gottesmann & Hamm, 1983) that takes advantage of the disruption of cell mitochondria induced by freezing and thawing of whole meat. This principle of this method is applicable and tested on several animal species among which fish.

The spectrophotometric method measures the conversion rate of NADH to NAD<sup>+</sup> by monitoring the decrease in absorption at 340 nm as shown in fig.1.

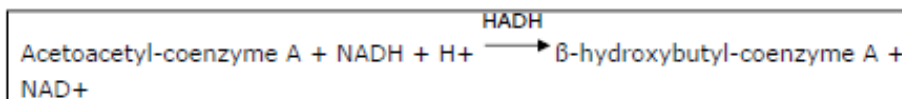

Fig.1 Conversion of NADH to NAD<sup>+</sup> in the presence of mitochondrial HADH.

Resultaten:

### Enzymatische bepaling:

#### 1. Uganda | CSZ56 01-06-2018 | Fresh Perch Ltd

Rikilt nr. to follow

In figuur 1 is absorptie afname gemeten van het monster Uganda | CSZ56 01-06-2018 tov van een bevroren referentiemonster nijlbaars (Figuur 5). De ratioberekeningen geven aan dat het monster niet bevroren is geweest.

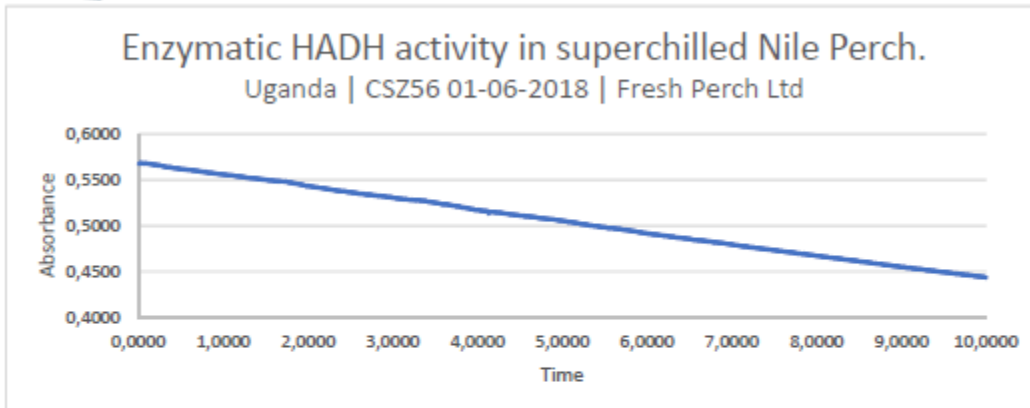

Fig.1 Enzymatic HADH activity in superchilled Nile Perch. Uganda | CSZ56 01-06-2018 | Fresh Perch Ltd

## 2. Uganda 04-06-2018 | Karmic Food Ltd.

Rikilt nr. RIK0519904

In figuur 2 is absorptie afname gemeten van het monster Uganda 04-06-2018 | Karmic Food Ltd. tov van een bevroren referentiemonster nijlbaars (Figuur 5). De ratioberekeningen geven aan dat het monster niet bevroren is geweest.

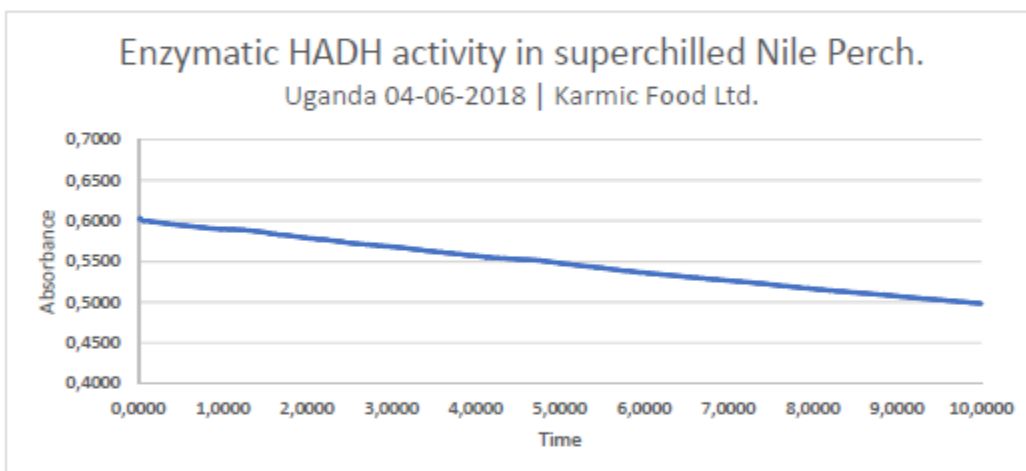

Fig.2 Enzymatic HADH activity in superchilled Nile Perch. Uganda | CSZ56 01-06-2018 | Fresh Perch Ltd

3. Kenia 04-06-2018 | East African Seafood Ltd.  
Rikilt nr. RIK0519905

In figuur 3 is absorptie afname gemeten van het monster Kenia 04-06-2018 | East African Seafood Ltd. tov van een bevroren referentiemonster nijlbaars (Figuur 5). De ratioberekeningen geven aan dat het monster niet bevroren is geweest.

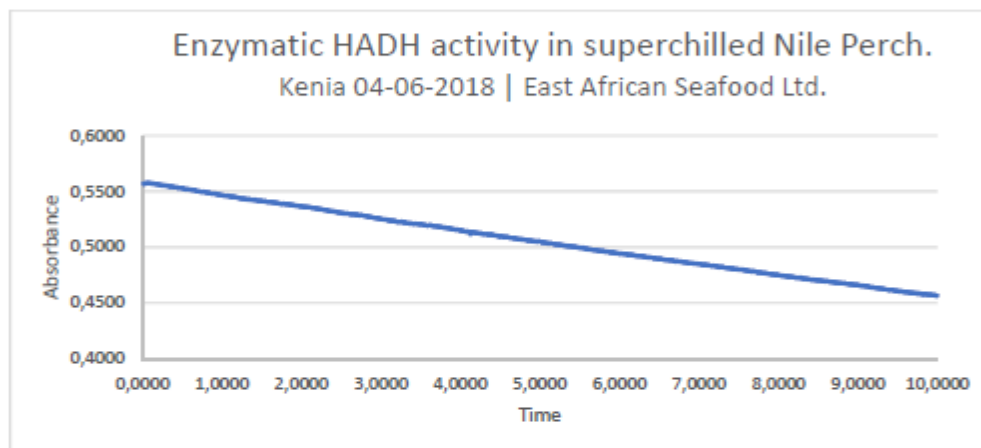

Fig.3 Enzymatic HADH activity in superchilled Nile Perch. Uganda | CSZ56 01-06-2018 | Fresh Perch Ltd

#### 4. Tanzania 08-06-2018 | Supreme Perch Ltd.

Rikilt nr. RIK0519906

In figuur 4 is absorptie afname gemeten van het monster Tanzania 08-06-2018 | Supreme Perch Ltd. tov van een bevroren referentiemonster nijlbaars (Figuur 5). De ratioberekeningen geven aan dat het monster niet bevroren is geweest.

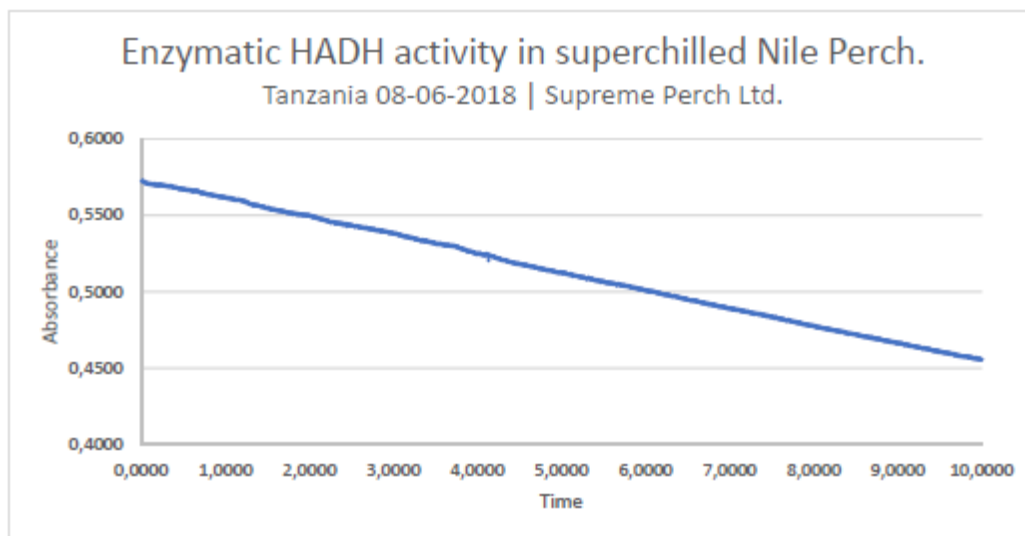

Fig.4 Enzymatic HADH activity in superchilled Nile Perch. Uganda | CSZ56 01-06-2018 | Fresh Perch Ltd

Bovenstaande monsters zijn gemeten ten opzichte van een bevroren monster Nijlbaars monster waarvan de enzymactiviteit is weergegeven in figuur. 5.

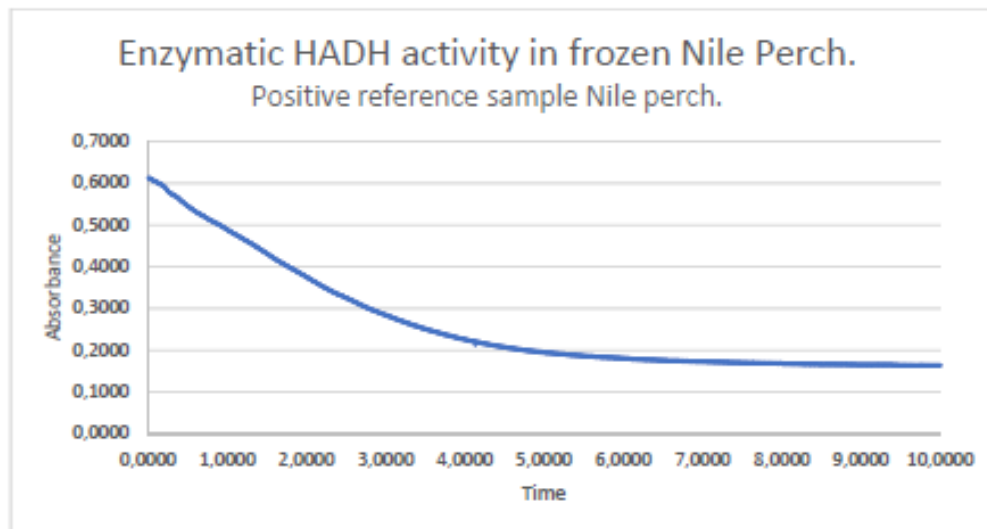

Fig.5 Enzymatic HADH activity in laboratory reference sample Nile Perch.  
Frozen for 48 h at -24 °C.

### Temperatuur metingen en bemonstering.

Er zijn verspreid over 3 dagen in totaal 4 monsters ontvangen in gelijke witte tempex dozen die bij ontvangst bij 4 °C zijn opgeslagen in afwachting van de microbiologische bemonstering door Mérieux NutriSciences te Ede. Iedere bemonstering nam ca. 15 minuten in beslag waarbij er 4 filets uit iedere doos werden genomen voor microbiologische analyses.

De temperaturen van de monsters zijn gemeten door een probe in het middelpunt van iedere doos te steken omdat de individuele filets te dun zijn om een stabiel uitlezing te verkrijgen.

Hier onder staat in chronologische volgorde het fotoverslag met beschrijving.



1. Uganda | CSZ56 01-06-2018 | Fresh Perch Ltd  
Rikilt nr. RIK0519903

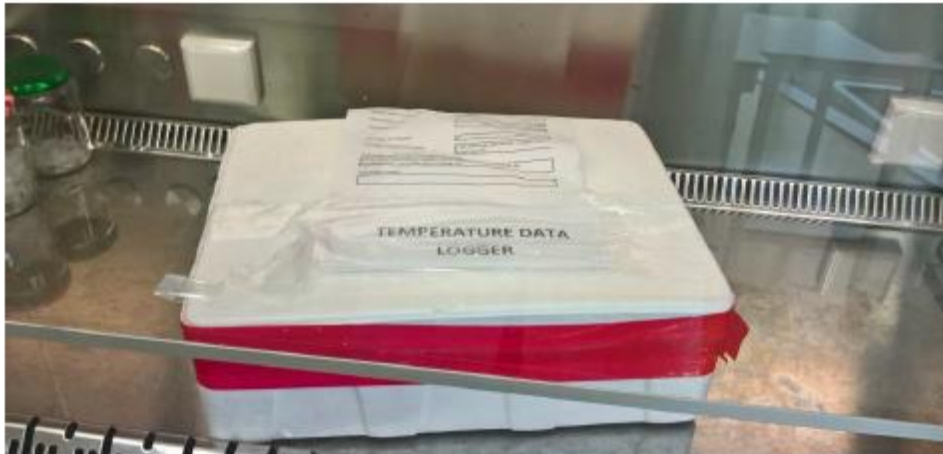

Foto 1. Zending uit Uganda | CSZ56 01-06-2018 | Fresh Perch Ltd,  
ontvangen op 1 juni 2018.  
Monster zoals aangekomen.  
Tijdstip aanvang bemonstering : 12:45

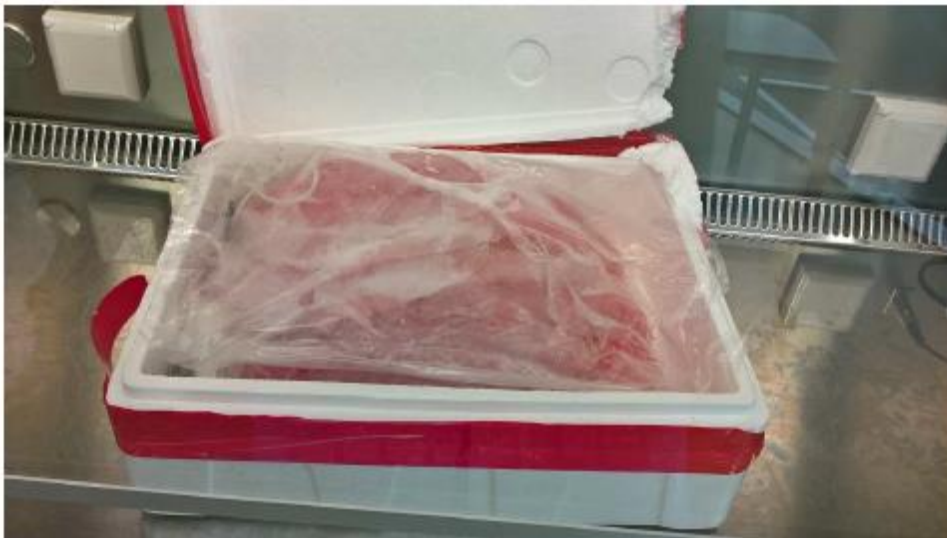

Foto 2. Zending uit Uganda | CSZ56 01-06-2018 | Fresh Perch Ltd,  
ontvangen op 1 juni 2018.  
Doos na openen voor bemonstering.

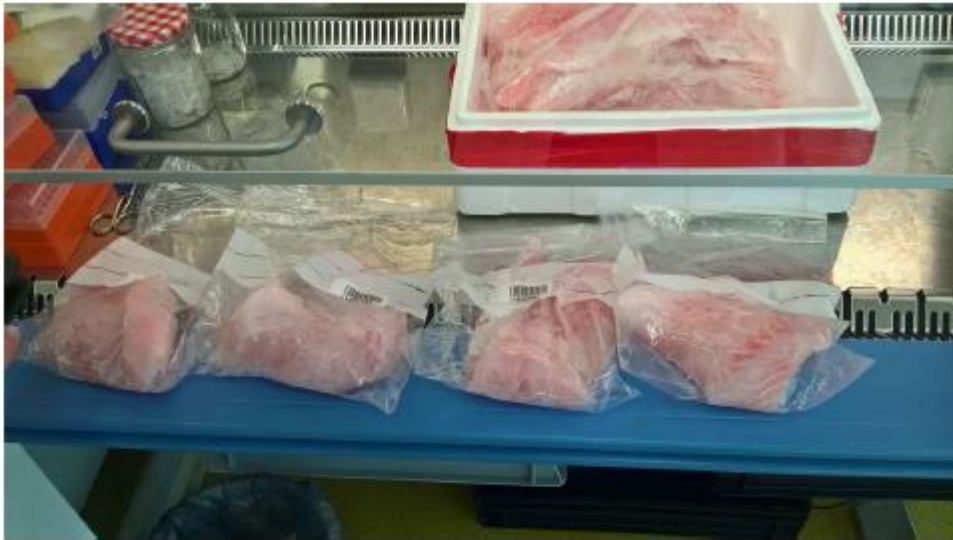

Foto 3. Zending uit Uganda | CSZ56 01-06-2018 | Fresh Perch Ltd, ontvangen op 1 juni 2018.  
4 filets genomen door Mérieux NutriSciences voor microbiologische analyses.

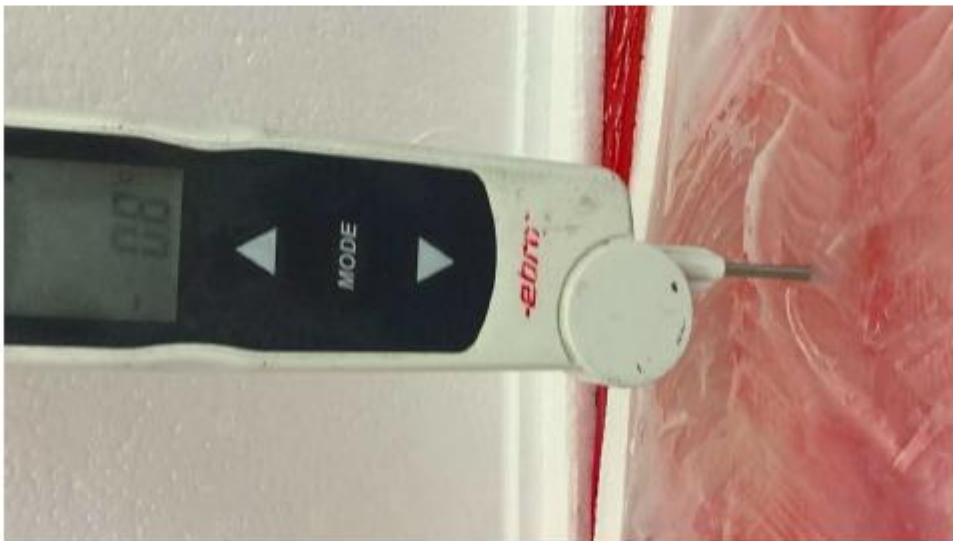

Foto 4. Zending uit Uganda | CSZ56 01-06-2018 | Fresh Perch Ltd, ontvangen op 1 juni 2018.  
Gemeten kern temperatuur : -0,8 °C.

2. Uganda 04-06-2018 | Karmic Food Ltd.  
Rikilt nr. RIK0519904

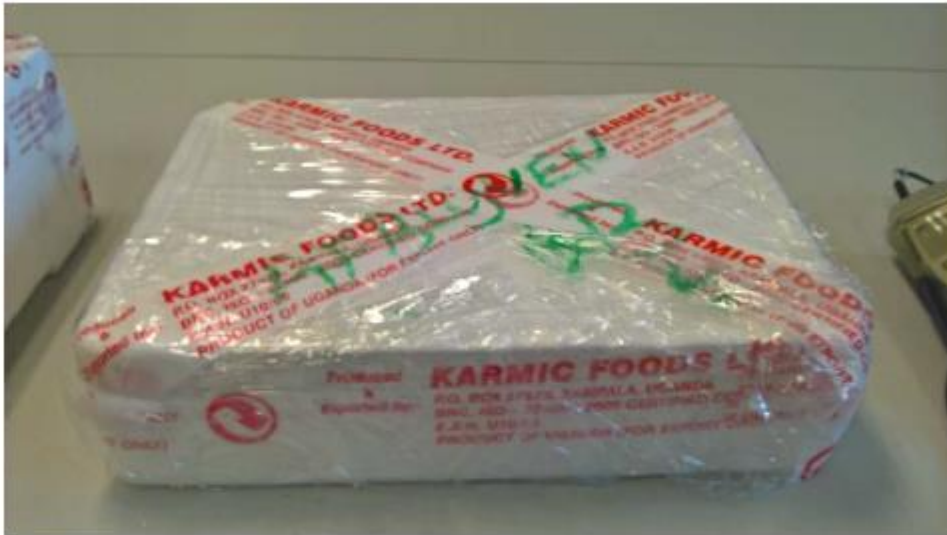

Foto 5. Zending uit Uganda 04-06-2018 | Karmic Food Ltd. ontvangen op 4 juni 2018.  
Monster zoals aangekomen.  
Tijdstip aanvang bemonstering : 11:15

3. Kenia 04-06-2018 | East African Seafood Ltd.  
Rikilt nr. RIK0519905

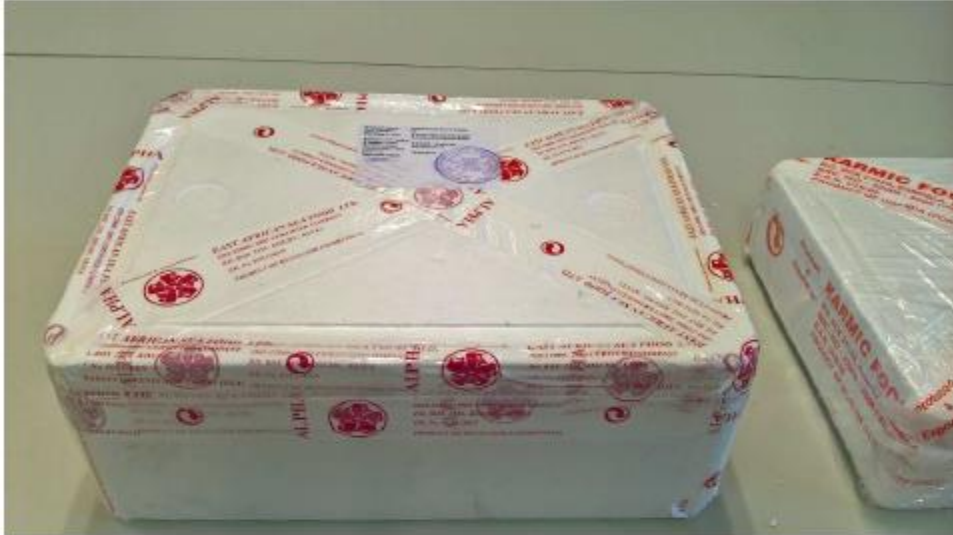

Foto 6. Zending uit Kenia 04-06-2018 | East African Seafood Ltd.ontvangen op 4 juni 2018.  
Monster zoals aangekomen.  
Tijdstip aanvang bemonstering : 11:15

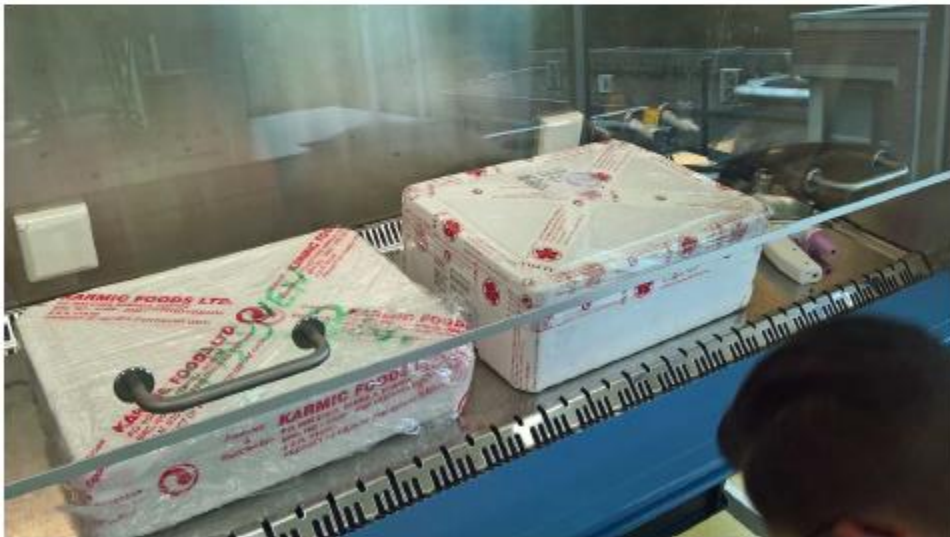

Foto 7. Zending uit Uganda 04-06-2018 | Karmic Food Ltd. (Links op de foto)en Kenia (Rechts op de foto)  
04-06-2018 | East African Seafood Ltd.ontvangen op 4 juni 2018.  
Beide monsters zoals aangekomen

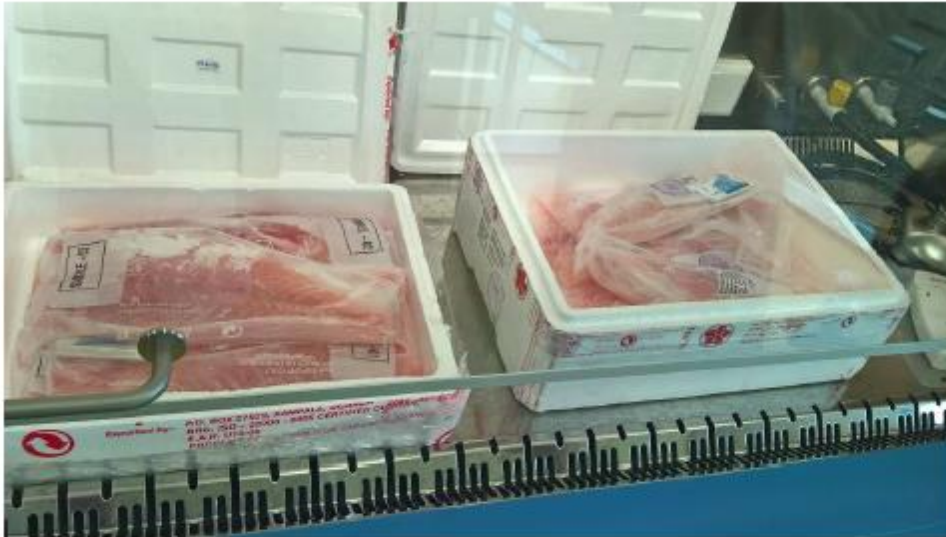

Foto 8. Zending uit Uganda 04-06-2018 | Karmic Food Ltd. (Links op de foto) en Kenia 04-06-2018 | East African Seafood Ltd. ontvangen (Rechts op de foto) op 4 juni 2018. Doos na openen voor bemonstering.  
Gemeten kern temp. Uganda 04-06-2018 | Karmic Food Ltd.: -0,5 °C.  
Gemeten kern temp. Kenia 04-06-2018 | East African Seafood Ltd.: 0,5 °C.

4. Tanzania 08-06-2018 | Supreme Perch Ltd.  
Rikilt nr. RIK0519906

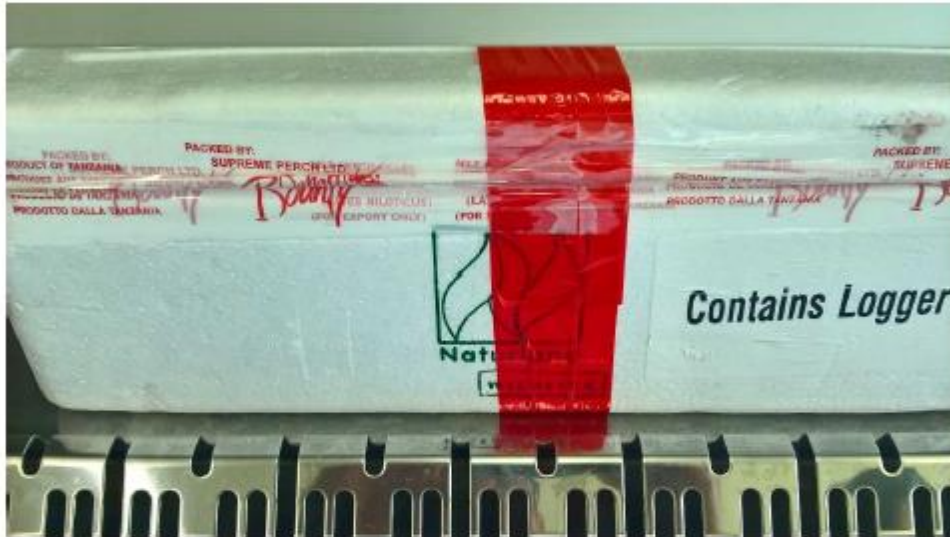

Foto 9. Zending uit Tanzania 08-06-2018 | Supreme Perch Ltd.  
ontvangen op 8 juni 2018.  
Monster zoals aangekomen.

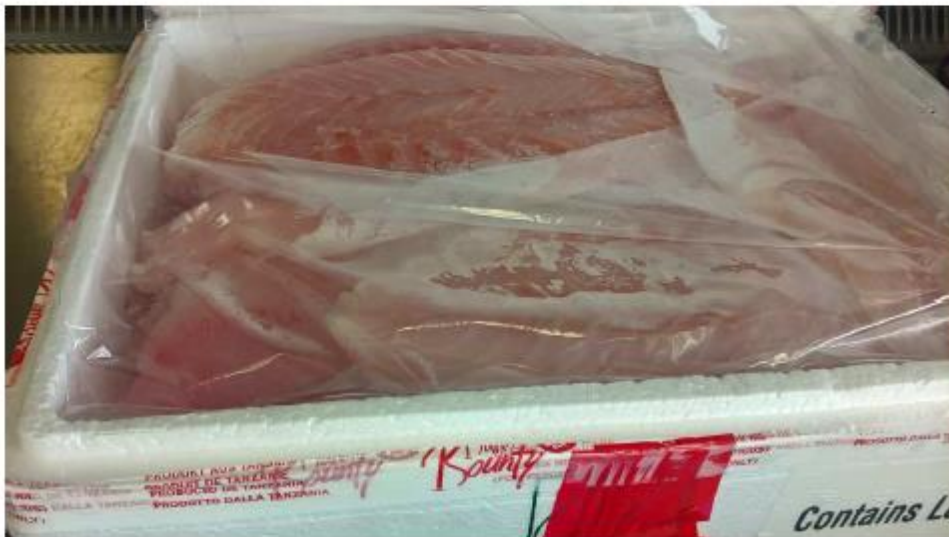

Foto 10. Zending uit Tanzania 08-06-2018 | Supreme Perch Ltd.  
Doos na openen voor bemonstering.  
Tijdstip aanvang bemonstering : 14:45

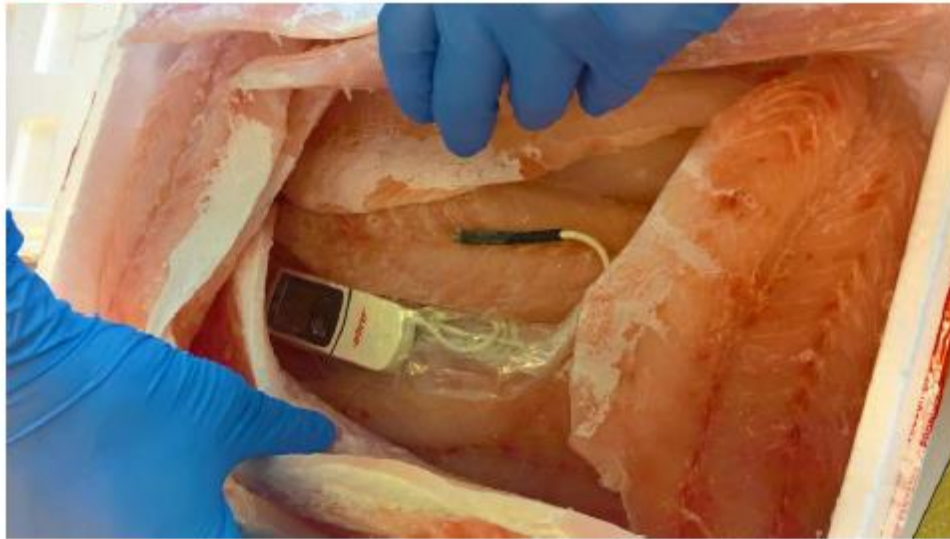

Foto 11. Zending uit Tanzania 08-06-2018 | Supreme Perch Ltd.  
Transport temperatuurlogger in de kern van de filets.

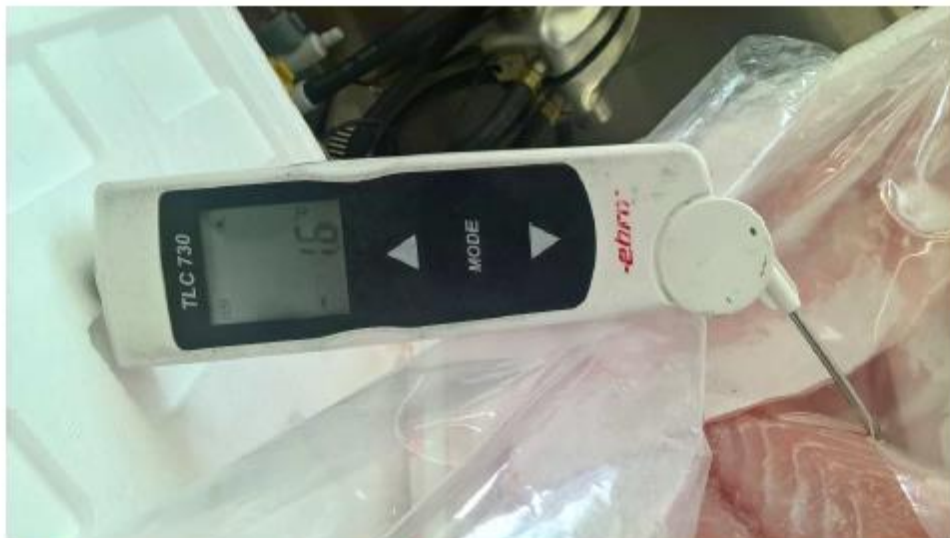

Foto 12. Zending uit Tanzania 08-06-2018 | Supreme Perch Ltd.  
Gemeten kern temperatuur : -1,6 °C.

### A1.3 Microbiological analysis Mérieux NutriSciences

Below the outcomes of the microbiological analysis by Mérieux Nutrisciences are given.

#### Monstergegevens

Nr. 17994122

|                                |                                                     |
|--------------------------------|-----------------------------------------------------|
| <b>Product</b>                 | : Chilled Nile perch fillet                         |
| <b>Monsternamedatum</b>        | : 01-06-2018 12:51                                  |
| <b>Datum start analyse</b>     | : 01-06-2018                                        |
| <b>Monstername door</b>        | : Mérieux NutriSciences (geaccrediteerd)            |
| <b>Conditie ontvangst</b>      | : Gekoeld                                           |
| <b>Productiedatum</b>          | : 30-05-2018                                        |
| <b>Code</b>                    | : C-221S-0113126                                    |
| <b>Overige informatie</b>      | : Fresh Perch Limited P.O box 671, Entebbe - Uganda |
| <b>Conditie van verpakking</b> | : Ongepend                                          |

#### Analyseresultaten

| Q Analyse Methode                                                               | Resultaat | Dimensie | Richtwaarde | Datum Afgerond |
|---------------------------------------------------------------------------------|-----------|----------|-------------|----------------|
| Q Tellen van Aeroob mesofiel kiemgetal conform ISO 4833-1                       | 140000    | kve/g    | -           | 07-06-2018     |
| Q Tellen van Enterobacteriaceae conform ISO 21528-2                             | 1200      | kve/g    | -           | 04-06-2018     |
| Q Aantallen van Salmonella Equivalent to ISO 6579 (GEN 25/05-11/08)             | Afwezig   | /25g     | -           | 05-06-2018     |
| Q Tellen van Escherichia coli conform ISO 16649-2                               | <10       | kve/g    | -           | 04-06-2018     |
| Q Tellen van Listeria monocytogenes equivalent to ISO 11290-2 (AES 10/05-09/08) | <10       | kve/g    | -           | 05-06-2018     |

Monsternummer 17994122:

1. Tellen van Enterobacteriaceae: Deze analyse is uitgevoerd zonder bevestiging/This analysis is performed without confirmation

Een met Q gemerkte analyse is uitgevoerd door een ISO 17025 geaccrediteerd laboratorium.

De « \* » gemerkte resultaten zijn indicatieve waarden. De « E » gemerkte analyses zijn door derden uitgevoerd.

Dit verslag mag zonder schriftelijke toestemming van ons niet anders dan in zijn geheel gereproduceerd worden. Enkel en uitsluitend het origineel en ondertekend verslag is bindend. De resultaten hebben enkel betrekking op het onderzochte monster.

Mérieux NutriSciences



Jean-François LECRIGNY  
Operations Manager

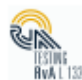

Silliker Netherlands B.V. trading as Mérieux NutriSciences

Pascalstraat 25 • 6716 AZ • EDE • Postbus 153 • 6710 BD EDE

Tel +31 (0)318 64 94 44 • Fax +31 (0)318 62 04 09 • KvK.nr. 09083961 • www.merieuxnutrisciences.nl



## Monstergegevens

Nr. 17994126

|                         |                                                     |
|-------------------------|-----------------------------------------------------|
| Product                 | : Chilled nile perch fillet                         |
| Monsternamedatum        | : 01-06-2018 12:51                                  |
| Datum start analyse     | : 01-06-2018                                        |
| Monstername door        | : Mérieux NutriSciences (geaccrediteerd)            |
| Conditie ontvangst      | : Gekoeld                                           |
| Productiedatum          | : 30-05-2018                                        |
| Code                    | : C-221S-0113126                                    |
| Overige informatie      | : Fresh Perch Limited P.O box 671, Entebbe - Uganda |
| Conditie van verpakking | : Ongeopend                                         |

### Analyseresultaten

| Q | Analyse<br>Methode                                                                  | Resultaat | Dimensie | Richtwaarde | Datum<br>Afgerond |
|---|-------------------------------------------------------------------------------------|-----------|----------|-------------|-------------------|
| Q | Tellen van Aeroob mesofiel kiemgetal<br>conform ISO 4833-1                          | 300000    | kve/g    | -           | 07-06-2018        |
| Q | Tellen van Enterobacteriaceae<br>conform ISO 21528-2                                | 720       | kve/g    | -           | 04-06-2018        |
| Q | Aantonen van Salmonella<br>Equivalent to ISO 8579 (GEN 25/05-11/08)                 | Afwezig   | /25g     | -           | 05-06-2018        |
| Q | Tellen van Escherichia coli<br>conform ISO 16649-2                                  | <10       | kve/g    | -           | 04-06-2018        |
| Q | Tellen van Listeria monocytogenes<br>equivalent to ISO 11290-2 (AES<br>10/05-09/06) | <10       | kve/g    | -           | 05-06-2018        |

Monstemummer 17994126:

1. Tellen van Enterobacteriaceae: Deze analyse is uitgevoerd zonder bevestiging/This analysis is performed without confirmation

Een met Q gemerkte analyse is uitgevoerd door een ISO 17025 geaccrediteerd laboratorium.

De « \* » gemerkte resultaten zijn indicatieve waarden. De « E » gemerkte analyses zijn door derden uitgevoerd. Dit verslag mag zonder schriftelijke toestemming van ons niet anders dan in zijn geheel gereproduceerd worden. Enkel en uitsluitend het origineel en ondertekend verslag is bindend. De resultaten hebben enkel betrekking op het onderzochte monster.

Mérieux NutriSciences



Jean-François LECRIGNY  
Operations Manager

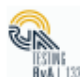

Silliker Netherlands B.V. trading as Mérieux NutriSciences

Pascalstraat 25 • 6716 AZ • EDE • Postbus 153 • 6710 BD EDE

Tel +31 (0)318 64 94 44 • Fax +31 (0)318 62 04 09 • Kvk.nr. 09063961 • www.merieuxnutrisciences.nl

## Monstergegevens

Nr. 18004487

|                                |                                               |
|--------------------------------|-----------------------------------------------|
| <b>Product</b>                 | : Chiled nile perch fillet ( Lates niloticus) |
| <b>Monsternamedatum</b>        | : 04-06-2018 12:23                            |
| <b>Datum start analyse</b>     | : 04-06-2018                                  |
| <b>Monstername door</b>        | : Mérieux NutriSciences (geaccrediteerd)      |
| <b>Conditie ontvangst</b>      | : Gekoeld                                     |
| <b>Productiedatum</b>          | : 30-05-2018                                  |
| <b>Code</b>                    | : E31830/CF/14 EAS002                         |
| <b>Overige informatie</b>      | : East African Seafood Ltd.-Kenya             |
| <b>Conditie van verpakking</b> | : Ongeopend                                   |

## Analyseresultaten

| Q | Analyse Methode                                                               | Resultaat | Dimensie | Richtwaarde | Datum Afgerond |
|---|-------------------------------------------------------------------------------|-----------|----------|-------------|----------------|
| Q | Tellen van Aeroob mesofiel kiemgetal conform ISO 4833-1                       | 180000    | kve/g    | -           | 10-06-2018     |
| Q | Tellen van Enterobacteriaceae conform ISO 21528-2                             | 740       | kve/g    | -           | 07-06-2018     |
| Q | Aantonen van Salmonella Equivalent to ISO 6579 (GEN 25/05-11/08)              | Afwezig   | /25g     | -           | 06-06-2018     |
| Q | Tellen van Escherichia coli conform ISO 16649-2                               | <10       | kve/g    | -           | 07-06-2018     |
| Q | Tellen van Listeria monocytogenes equivalent to ISO 11290-2 (AES 10/05-09/06) | <10       | kve/g    | -           | 09-06-2018     |

Monsternummer 18004487:

1. Tellen van Enterobacteriaceae: Deze analyse is uitgevoerd zonder bevestiging/This analysis is performed without confirmation

Een met Q gemerkte analyse is uitgevoerd door een ISO 17025 geaccrediteerd laboratorium.

De « \* » gemerkte resultaten zijn indicatieve waarden. De « E » gemerkte analyses zijn door derden uitgevoerd.

Dit verslag mag zonder schriftelijke toestemming van ons niet anders dan in zijn geheel gereproduceerd worden.

Enkel en uitsluitend het origineel en ondertekend verslag is bindend. De resultaten hebben enkel betrekking op het onderzochte monster.

Mérieux NutriSciences



Jean-François LECRIGNY  
Operations Manager

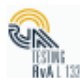

Silliker Netherlands B.V. trading as Mérieux NutriSciences

Pascalstraat 25 • 6716 AZ • EDE • Postbus 153 • 6710 BD EDE

Tel +31 (0)318 64 94 44 • Fax +31 (0)318 62 04 09 • Kvk.nr. 09063961 • www.merieuxnutrisciences.nl

## Monstergegevens

Nr. 18004491

|                                |                                               |
|--------------------------------|-----------------------------------------------|
| <b>Product</b>                 | : Chiled Nile perch fillet ( Lates niloticus) |
| <b>Monsternamedatum</b>        | : 04-06-2018 12:23                            |
| <b>Datum start analyse</b>     | : 04-06-2018                                  |
| <b>Monstername door</b>        | : Mérieux NutriSciences (geaccrediteerd)      |
| <b>Conditie ontvangst</b>      | : Gekoeld                                     |
| <b>Productiedatum</b>          | : 30-05-2018                                  |
| <b>Code</b>                    | : E31830/CF/14 EAS003                         |
| <b>Overige informatie</b>      | : East African Seafood Ltd.-Kenya             |
| <b>Conditie van verpakking</b> | : Ongeopend                                   |

## Analyseresultaten

| Q | Analyse<br>Methode                                                                  | Resultaat | Dimensie | Richtwaarde | Datum<br>Afgerond |
|---|-------------------------------------------------------------------------------------|-----------|----------|-------------|-------------------|
| Q | Tellen van Aeroob mesofiel kiemgetal<br>conform ISO 4833-1                          | 280000    | kve/g    | -           | 10-06-2018        |
| Q | Tellen van Enterobacteriaceae<br>conform ISO 21528-2                                | 750       | kve/g    | -           | 07-06-2018        |
| Q | Aantonen van Salmonella<br>Equivalent to ISO 6579 (GEN 25/05-11/08)                 | Afwezig   | /25g     | -           | 06-06-2018        |
| Q | Tellen van Escherichia coli<br>conform ISO 16649-2                                  | <10       | kve/g    | -           | 07-06-2018        |
| Q | Tellen van Listeria monocytogenes<br>equivalent to ISO 11290-2 (AES<br>10/05-09/06) | <10       | kve/g    | -           | 09-06-2018        |

Monsternummer 18004491:

1. Tellen van Enterobacteriaceae: Deze analyse is uitgevoerd zonder bevestiging/This analysis is performed without confirmation

Een met Q gemerkte analyse is uitgevoerd door een ISO 17025 geaccrediteerd laboratorium.  
De « \* » gemerkte resultaten zijn indicatieve waarden. De « E » gemerkte analyses zijn door derden uitgevoerd.  
Dit verslag mag zonder schriftelijke toestemming van ons niet anders dan in zijn geheel gereproduceerd worden.  
Enkel en uitsluitend het origineel en ondertekend verslag is bindend. De resultaten hebben enkel betrekking op het onderzochte monster.

Mérieux NutriSciences



Jean-François LECRIGNY  
Operations Manager

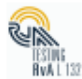

Silliker Netherlands B.V. trading as Mérieux NutriSciences

Pascalstraat 25 • 6716 AZ • EDE • Postbus 153 • 6710 BD EDE  
Tel +31 (0)318 64 94 44 • Fax +31 (0)318 62 04 09 • Kvk.nr. 09083961 • www.merieuxnutrisciences.nl

## Monstergegevens

Nr. 18004495

|                                |                                               |
|--------------------------------|-----------------------------------------------|
| <b>Product</b>                 | : Chiled Nile perch fillet ( Lates niloticus) |
| <b>Monsternamedatum</b>        | : 04-06-2018 12:22                            |
| <b>Datum start analyse</b>     | : 04-06-2018                                  |
| <b>Monstername door</b>        | : Mérieux NutriSciences (geaccrediteerd)      |
| <b>Conditie ontvangst</b>      | : Gekoeld                                     |
| <b>Productiedatum</b>          | : 30-05-2018                                  |
| <b>Code</b>                    | : K18150A72401 Sampel 03                      |
| <b>Overige informatie</b>      | : Karmic foods Ltd.-uruganda                  |
| <b>Conditie van verpakking</b> | : Ongeopend                                   |

## Analyseresultaten

| Q | Analyse Methode                                                               | Resultaat | Dimensie | Richtwaarde | Datum Afgerond |
|---|-------------------------------------------------------------------------------|-----------|----------|-------------|----------------|
| Q | Tellen van Aeroob mesofiel kiemgetal conform ISO 4833-1                       | 210000    | kve/g    | -           | 10-06-2018     |
| Q | Tellen van Enterobacteriaceae conform ISO 21528-2                             | 1 250     | kve/g    | -           | 07-06-2018     |
| Q | Aantallen van Salmonella Equivalent to ISO 6579 (GEN 25/05-11/08)             | Afwezig   | /25g     | -           | 06-06-2018     |
| Q | Tellen van Escherichia coli conform ISO 16649-2                               | <10       | kve/g    | -           | 07-06-2018     |
| Q | Tellen van Listeria monocytogenes equivalent to ISO 11290-2 (AES 10/05-09/06) | <10       | kve/g    | -           | 09-06-2018     |

Monsternummer 18004495:

1. Tellen van Enterobacteriaceae: Deze analyse is uitgevoerd zonder bevestiging/This analysis is performed without confirmation

Een met Q gemerkte analyse is uitgevoerd door een ISO 17025 geaccrediteerd laboratorium.

De « \* » gemerkte resultaten zijn indicatieve waarden. De « E » gemerkte analyses zijn door derden uitgevoerd.

Dit verslag mag zonder schriftelijke toestemming van ons niet anders dan in zijn geheel gereproduceerd worden.

Enkel en uitsluitend het origineel en ondertekend verslag is bindend. De resultaten hebben enkel betrekking op het onderzochte monster.

Mérieux NutriSciences



Jean-François LECRIGNY  
Operations Manager

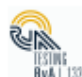

**Silliker Netherlands B.V. trading as Mérieux NutriSciences**

Pascalstraat 25 • 6716 AZ • EDE • Postbus 153 • 6710 BD EDE

Tel +31 (0)318 64 94 44 • Fax +31 (0)318 62 04 09 • Kvk.nr. 09063961 • [www.merieuxnutrisciences.nl](http://www.merieuxnutrisciences.nl)

## Monstergegevens

Nr. 18004499

**Product** : Chiled nile perch fillet ( Lates niloticus)  
**Monsternamedatum** : 04-06-2018 12:23  
**Datum start analyse** : 04-06-2018  
**Monstername door** : Mérieux NutriSciences (geaccrediteerd)  
**Conditie ontvangst** : Gekoeld  
**Productiedatum** : 30-05-2018  
**Code** : K18150A72401 Sampel 02  
**Overige informatie** : Karmic food Ltd.-Urganda  
**Conditie van verpakking** : Ongeopend

## Analyseresultaten

| Q | Analyse<br>Methode                                                            | Resultaat | Dimensie | Richtwaarde | Datum<br>Afgerond |
|---|-------------------------------------------------------------------------------|-----------|----------|-------------|-------------------|
| Q | Tellen van Aeroob mesofiel kiemgetal conform ISO 4833-1                       | 26000     | kve/g    | -           | 10-06-2018        |
| Q | Tellen van Enterobacteriaceae conform ISO 21528-2                             | 1         | kve/g    | -           | 07-06-2018        |
| Q | Aantonen van Salmonella Equivalent to ISO 6579 (GEN 25/05-11/08)              | Afwezig   | /25g     | -           | 06-06-2018        |
| Q | Tellen van Escherichia coli conform ISO 16649-2                               | <10       | kve/g    | -           | 07-06-2018        |
| Q | Tellen van Listeria monocytogenes equivalent to ISO 11290-2 (AES 10/05-09/06) | <10       | kve/g    | -           | 09-06-2018        |

Monsternummer 18004499:

1. Tellen van Enterobacteriaceae: Deze analyse is uitgevoerd zonder bevestiging/This analysis is performed without confirmation

Een met Q gemerkte analyse is uitgevoerd door een ISO 17025 geaccrediteerd laboratorium.

De « \* » gemerkte resultaten zijn indicatieve waarden. De « E » gemerkte analyses zijn door derden uitgevoerd.

Dit verslag mag zonder schriftelijke toestemming van ons niet anders dan in zijn geheel gereproduceerd worden. Enkel en uitsluitend het origineel en ondertekend verslag is bindend. De resultaten hebben enkel betrekking op het onderzochte monster.

Mérieux NutriSciences



Jean-François LECRIGNY  
Operations Manager

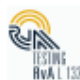

Silliker Netherlands B.V. trading as Mérieux NutriSciences

Pascalstraat 25 • 6716 AZ • EDE • Postbus 153 • 6710 BD EDE

Tel +31 (0)318 64 94 44 • Fax +31 (0)318 62 04 09 • Kvk.nr. 09063961 • www.merieuxnutrisciences.nl

## Monstergegevens

Nr. 18048805

**Product** : Chillid Nile perch fillet tanzania  
**Monsternamedatum** : 08-06-2018 14:07  
**Datum start analyse** : 08-06-2018  
**Monstername door** : Mérieux NutriSciences (geaccrediteerd)  
**Conditie ontvangst** : Bevroren  
**Productiedatum** : 05-06-2018  
**THT datum** : 17-06-2018  
**Code** : Anova nr 1273 L 4729  
**Overige informatie** : Supreme Perch (Mwanza) Ltd.  
**Conditie van verpakking** : Ongeopend

## Analyseresultaten

| Q | Analyse Methode                                                               | Resultaat | Dimensie | Richtwaarde | Datum Afgerond |
|---|-------------------------------------------------------------------------------|-----------|----------|-------------|----------------|
| Q | Tellen van Aeroob mesofiel kiemgetal conform ISO 4833-1                       | >300000   | kve/g    | -           | 13-06-2018     |
| Q | Tellen van Enterobacteriaceae conform ISO 21528-2                             | 9900      | kve/g    | -           | 11-06-2018     |
| Q | Aantonen van Salmonella Equivalent to ISO 6579 (GEN 25/05-11/08)              | Afwezig   | /25g     | -           | 11-06-2018     |
| Q | Tellen van Escherichia coli conform ISO 16649-2                               | <10       | kve/g    | -           | 11-06-2018     |
| Q | Tellen van Listeria monocytogenes equivalent to ISO 11290-2 (AES 10/05-09/06) | <10       | kve/g    | -           | 12-06-2018     |

Monsternummer 18048805:

1. Tellen van Enterobacteriaceae: Deze analyse is uitgevoerd zonder bevestiging/This analysis is performed without confirmation

Een met Q gemerkte analyse is uitgevoerd door een ISO 17025 geaccrediteerd laboratorium.

De « \* » gemerkte resultaten zijn indicatieve waarden. De « E » gemerkte analyses zijn door derden uitgevoerd.

Dit verslag mag zonder schriftelijke toestemming van ons niet anders dan in zijn geheel gereproduceerd worden.

Enkel en uitsluitend het origineel en ondertekend verslag is bindend. De resultaten hebben enkel betrekking op het onderzochte monster.

Mérieux NutriSciences



Jean-François LECRIGNY  
Operations Manager

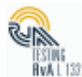

Silliker Netherlands B.V. trading as Mérieux NutriSciences

Pascalstraat 25 • 6716 AZ • EDE • Postbus 153 • 6710 BD EDE

Tel +31 (0)318 64 94 44 • Fax +31 (0)318 62 04 09 • Kvk.nr. 09063961 • www.merieuxnutrisciences.nl

## Monstergegevens

Nr. 18048810

|                         |                                          |
|-------------------------|------------------------------------------|
| Product                 | : Chillid Nile perch fillet Tanzania     |
| Monsternamedatum        | : 08-06-2018 14:07                       |
| Datum start analyse     | : 08-06-2018                             |
| Monstername door        | : Mérieux NutriSciences (geaccrediteerd) |
| Conditie ontvangst      | : Bevroren                               |
| Productiedatum          | : 05-06-2018                             |
| THT datum               | : 17-06-2018                             |
| Code                    | : Anova nr 1273 L 4729                   |
| Overige informatie      | : Supreme Perch (Mwanza) Ltd.            |
| Conditie van verpakking | : Ongeopend                              |

## Analyseresultaten

| Q | Analyse Methode                                                               | Resultaat | Dimensie | Richtwaarde | Datum Afgerond |
|---|-------------------------------------------------------------------------------|-----------|----------|-------------|----------------|
| Q | Tellen van Aeroob mesofiel kiemgetal conform ISO 4833-1                       | >300000   | kve/g    | -           | 13-06-2018     |
| Q | Tellen van Enterobacteriaceae conform ISO 21528-2                             | 6200      | kve/g    | -           | 11-06-2018     |
| Q | Aantonen van Salmonella Equivalent to ISO 6579 (GEN 25/05-11/08)              | Afwezig   | /25g     | -           | 11-06-2018     |
| Q | Tellen van Escherichia coli conform ISO 16649-2                               | <10       | kve/g    | -           | 11-06-2018     |
| Q | Tellen van Listeria monocytogenes equivalent to ISO 11290-2 (AES 10/05-09/06) | <10       | kve/g    | -           | 12-06-2018     |

Monsternummer 18048810:

1. Tellen van Enterobacteriaceae: Deze analyse is uitgevoerd zonder bevestiging/This analysis is performed without confirmation

Een met Q gemerkte analyse is uitgevoerd door een ISO 17025 geaccrediteerd laboratorium.

De « \* » gemerkte resultaten zijn indicatieve waarden. De « E » gemerkte analyses zijn door derden uitgevoerd.

Dit verslag mag zonder schriftelijke toestemming van ons niet anders dan in zijn geheel gereproduceerd worden.

Enkel en uitsluitend het origineel en ondertekend verslag is bindend. De resultaten hebben enkel betrekking op het onderzochte monster.

Mérieux NutriSciences



Jean-François LECRIGNY  
Operations Manager

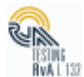

Silliker Netherlands B.V. trading as Mérieux NutriSciences

Pascalstraat 25 • 6716 AZ • EDE • Postbus 153 • 6710 BD EDE

Tel +31 (0)318 64 94 44 • Fax +31 (0)318 62 04 09 • Kvk.nr. 09063961 • www.merieuxnutrisciences.nl

## A1.4 Data loggers

Graphs of dataloggers used in the validated research in this report are given below:

Supreme Perch Ltd.

### Measurement

**-ebro<sup>+</sup>**

#### General information

Long distance refrigerated transport

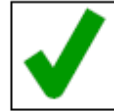

#### Device information

|             |                 |               |       |
|-------------|-----------------|---------------|-------|
| Logger type | EBI 300 V1.39.0 | Programmed by | Wilma |
| Serial      | 73248235        | Profile ID    | ID6   |
| Probe type  | TPC 300         |               |       |

#### Logging configuration

|          |                      |            |                   |
|----------|----------------------|------------|-------------------|
| Mode     | Until memory is full | Start time | 5.6.2018 10:58:14 |
| Interval | 1 min.               | Stop time  | 8.6.2018 14:57:14 |
| Duration | 3d 03:59:00          | Data count | 4560              |
|          | 0 min.               |            |                   |

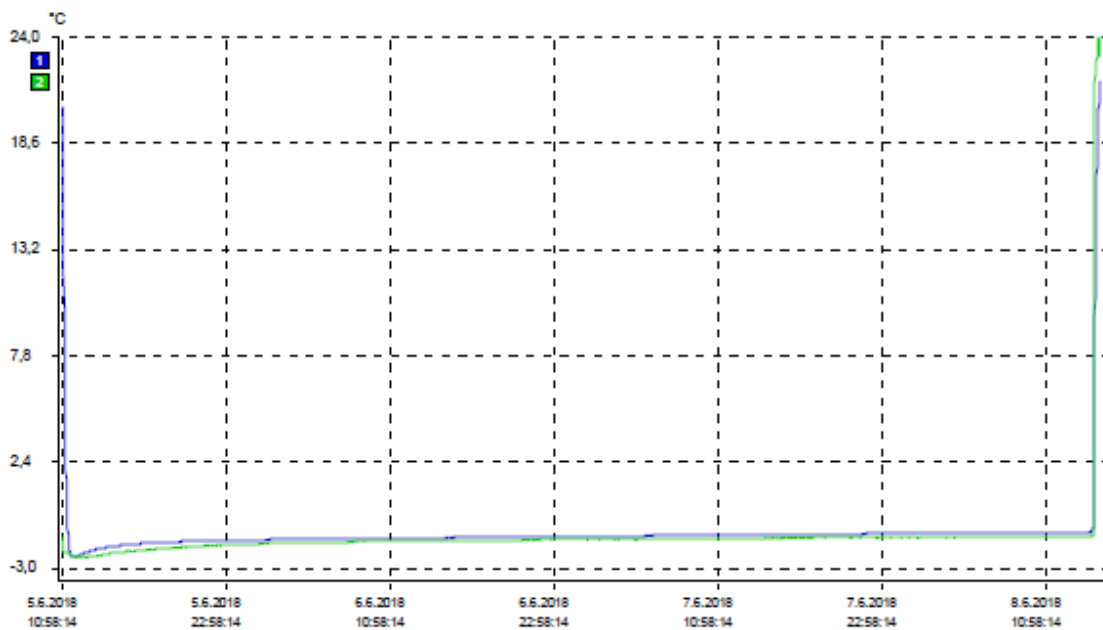

|      | Low limit                                 | High limit                               |
|------|-------------------------------------------|------------------------------------------|
| 1 °C | <input checked="" type="checkbox"/> -30,0 | <input checked="" type="checkbox"/> 30,0 |
| 2 °C | <input checked="" type="checkbox"/> -30,0 | <input checked="" type="checkbox"/> 30,0 |

#### Signature

8.6.2018 14:58:12 UTC+02:00  
EBI300.pdf

**-ebro<sup>+</sup>**  
www.ebro.com



Fresh Perch Ltd.

Measurement

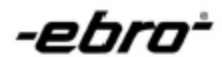

General information

Long distance refrigerated transport

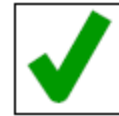

Device information

|             |                 |               |       |
|-------------|-----------------|---------------|-------|
| Logger type | EBI 300 V1.39.0 | Programmed by | Wilma |
| Serial      | 73248218        | Profile ID    | ID6   |
| Probe type  | TPC 300         |               |       |

Logging configuration

|          |                      |            |                    |
|----------|----------------------|------------|--------------------|
| Mode     | Until memory is full | Start time | 30.5.2018 10:18:11 |
| Interval | 1 min.               | Stop time  | 1.6.2018 12:48:11  |
| Duration | 2d 02:30:00          | Data count | 3031               |
|          | 0 min.               |            |                    |

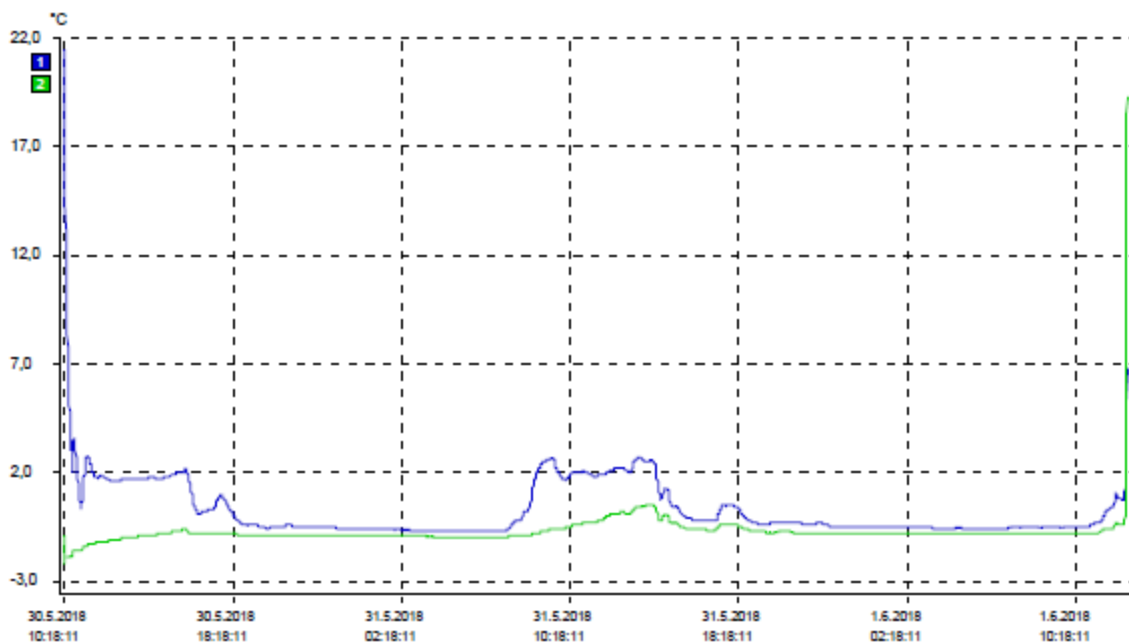

|      | Low limit                                 | High limit                               |
|------|-------------------------------------------|------------------------------------------|
| 1 °C | <input checked="" type="checkbox"/> -30,0 | <input checked="" type="checkbox"/> 30,0 |
| 2 °C | <input checked="" type="checkbox"/> -30,0 | <input checked="" type="checkbox"/> 30,0 |

-----  
Signature

1.6.2018 13:10:44 UTC+02:00  
EBI300.pdf

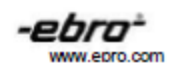

# Data Report

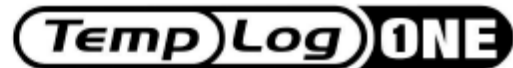

## Device Information

|                       |            |                          |           |
|-----------------------|------------|--------------------------|-----------|
| Serial Number:        | 1510012224 | Capacity:                | 5000      |
| Measurement Interval: | 9 minute   | Startup Delay:           | 30 minute |
| Upper Alarm Limit:    | 8°C        | Device Type and Version: |           |
| Upper Alarm Time:     | 30 minute  | Description:             |           |
| Lower Alarm Limit:    | 2°C        |                          |           |
| Lower Alarm Time:     | 30 minute  |                          |           |

## Logging Summary

|                       |                        |              |        |
|-----------------------|------------------------|--------------|--------|
| Record Count:         | 1215                   | Minimum:     | -0,8°C |
| Measurement Interval: | 9 minute               | Maximum:     | 26,6°C |
| Startup Time:         | 30.05.2018<br>13:12:00 | Average:     | 7,81°C |
| Finish time:          | 07.06.2018<br>03:18:00 | Alarm Count: | 2      |

## Temperature Chart

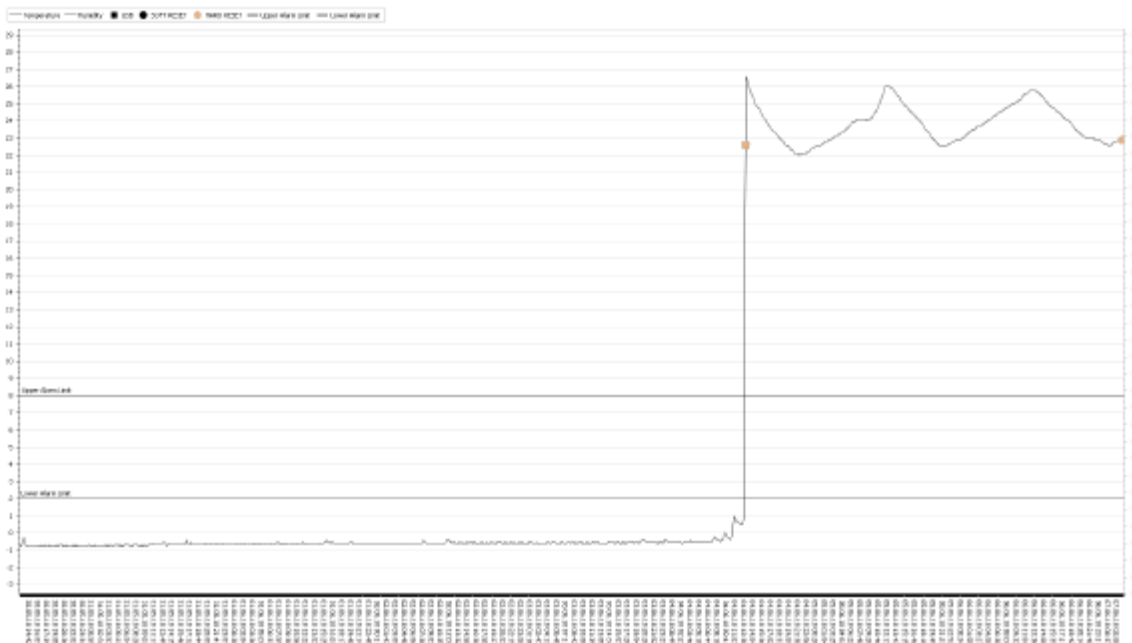



## Annex II Company self-monitoring program

### A2.1 Superchilling information at origin

Raw data information of the superchilling process are given in table below.

| <b>Lake Bounty Ltd. – Uganda</b> |                 |                          |                        |                 |                               |
|----------------------------------|-----------------|--------------------------|------------------------|-----------------|-------------------------------|
| <b>Date</b>                      | <b>Sample #</b> | <b>Start Temperature</b> | <b>End Temperature</b> | <b>Delta T°</b> | <b>Treatment duration (m)</b> |
| 14-dec                           | 1               | 3,1                      | -1,8                   | 4,9             | 36                            |
| 14-dec                           | 2               | 3                        | -1,6                   | 4,6             | 37                            |
| 14-dec                           | 3               | 3,5                      | -1,9                   | 5,4             | 43                            |
| 14-dec                           | 4               | 3,3                      | -1,5                   | 4,8             | 46                            |
| 14-dec                           | 5               | 3,8                      | -1,7                   | 5,5             | 45                            |
| 14-dec                           | 6               | 4                        | -1,7                   | 5,7             | 48                            |
| 14-dec                           | 7               | 3,8                      | -1,8                   | 5,6             | 43                            |
| 14-dec                           | 8               | 4,3                      | -1,6                   | 5,9             | 46                            |
| 14-dec                           | 9               | 4,4                      | -1,9                   | 6,3             | 58                            |
| 14-dec                           | 10              | 3,8                      | -1,5                   | 5,3             | 56                            |
| 15-dec                           | 11              | 3,3                      | -1,6                   | 4,9             | 45                            |
| 15-dec                           | 12              | 3,1                      | -1,4                   | 4,5             | 44                            |
| 15-dec                           | 13              | 3,8                      | -1,7                   | 5,5             | 45                            |
| 15-dec                           | 14              | 3,6                      | -1,2                   | 4,8             | 45                            |
| 15-dec                           | 15              | 3,3                      | -1,5                   | 4,8             | 45                            |
| 15-dec                           | 16              | 4,2                      | -1,9                   | 6,1             | 42                            |
| 15-dec                           | 17              | 3,4                      | -1,3                   | 4,7             | 46                            |
| 15-dec                           | 18              | 4,5                      | -1,7                   | 6,2             | 45                            |
| 15-dec                           | 19              | 4,6                      | -1,9                   | 6,5             | 44                            |
| 15-dec                           | 20              | 3,2                      | -1,6                   | 4,8             | 57                            |
| 17-dec                           | 21              | 3,1                      | -1,4                   | 4,5             | 30                            |
| 17-dec                           | 22              | 3,8                      | -1,7                   | 5,5             | 39                            |
| 17-dec                           | 23              | 3,3                      | -1,5                   | 4,8             | 40                            |
| 17-dec                           | 24              | 3,4                      | -1,7                   | 5,1             | 40                            |
| 17-dec                           | 25              | 2,9                      | -1,3                   | 4,2             | 30                            |
| 17-dec                           | 26              | 3,9                      | -1,8                   | 5,7             | 35                            |
| 17-dec                           | 27              | 3,8                      | -2                     | 5,8             | 35                            |
| 17-dec                           | 28              | 3,4                      | -1,6                   | 5               | 47                            |
| 17-dec                           | 29              | 4,2                      | -1,7                   | 5,9             | 36                            |
| 17-dec                           | 30              | 4,2                      | -1,5                   | 5,7             | 45                            |
| 19-dec                           | 31              | 3,2                      | -1,7                   | 4,9             | 66                            |
| 19-dec                           | 32              | 3,4                      | -1,5                   | 4,9             | 48                            |
| 19-dec                           | 33              | 3,3                      | -1,6                   | 4,9             | 53                            |
| 19-dec                           | 34              | 3,2                      | -1,3                   | 4,5             | 52                            |
| 19-dec                           | 35              | 3,8                      | -1,8                   | 5,6             | 44                            |
| 19-dec                           | 36              | 4                        | -1,4                   | 5,4             | 44                            |
| 19-dec                           | 37              | 3,6                      | -1,9                   | 5,5             | 43                            |
| 19-dec                           | 38              | 3,3                      | -1,7                   | 5               | 44                            |

|        |    |     |      |     |    |
|--------|----|-----|------|-----|----|
| 19-dec | 39 | 4,1 | -1,8 | 5,9 | 47 |
| 19-dec | 40 | 4,3 | -1,6 | 5,9 | 38 |
| 22-dec | 41 | 3,6 | -1,4 | 5   | 42 |
| 22-dec | 42 | 3,1 | -1,7 | 4,8 | 43 |
| 22-dec | 43 | 3,8 | -2   | 5,8 | 43 |
| 22-dec | 44 | 3,4 | -0,8 | 4,2 | 43 |
| 22-dec | 45 | 3,7 | -1,6 | 5,3 | 42 |
| 22-dec | 46 | 4,1 | -1,9 | 6   | 44 |
| 22-dec | 47 | 3,5 | -1,4 | 4,9 | 43 |
| 22-dec | 48 | 4,4 | -1,2 | 5,6 | 44 |
| 22-dec | 49 | 4,2 | -1,5 | 5,7 | 46 |
| 22-dec | 50 | 3,6 | -1,9 | 5,5 | 46 |
| 28-dec | 51 | 3,5 | -1,9 | 5,4 | 42 |
| 28-dec | 52 | 3,3 | -1,6 | 4,9 | 43 |
| 28-dec | 53 | 3,4 | -2   | 5,4 | 43 |
| 28-dec | 54 | 4,4 | -1,7 | 6,1 | 44 |
| 28-dec | 55 | 4,2 | -1,8 | 6   | 36 |
| 28-dec | 56 | 3,3 | -1,4 | 4,7 | 27 |
| 28-dec | 57 | 3,6 | -1,7 | 5,3 | 44 |
| 28-dec | 58 | 3,2 | -1,6 | 4,8 | 44 |
| 28-dec | 59 | 3,4 | -1,2 | 4,6 | 45 |
| 28-dec | 60 | 3,9 | -1,5 | 5,4 | 47 |
| 2-jan  | 61 | 3,2 | -1,9 | 5,1 | 38 |
| 2-jan  | 62 | 3,5 | -1,7 | 5,2 | 44 |
| 2-jan  | 63 | 3,8 | -2   | 5,8 | 44 |
| 2-jan  | 64 | 4   | -1,8 | 5,8 | 43 |
| 2-jan  | 65 | 4,2 | -1,6 | 5,8 | 38 |
| 2-jan  | 66 | 3,8 | -2,1 | 5,9 | 42 |
| 2-jan  | 67 | 3,9 | -2   | 5,9 | 43 |
| 2-jan  | 68 | 4,1 | -1,7 | 5,8 | 43 |
| 2-jan  | 69 | 4,4 | -1,4 | 5,8 | 43 |
| 2-jan  | 70 | 3,8 | -1,6 | 5,4 | 42 |
| 3-jan  | 71 | 3,5 | -1,8 | 5,3 | 43 |
| 3-jan  | 72 | 3   | -1,4 | 4,4 | 43 |
| 3-jan  | 73 | 3,3 | -1,5 | 4,8 | 46 |
| 3-jan  | 74 | 3,6 | -1,7 | 5,3 | 45 |
| 3-jan  | 75 | 3,9 | -1,4 | 5,3 | 45 |
| 3-jan  | 76 | 4,1 | -1,9 | 6   | 42 |
| 3-jan  | 77 | 3,7 | -2   | 5,7 | 44 |
| 3-jan  | 78 | 3,1 | -1,5 | 4,6 | 45 |
| 3-jan  | 79 | 3,4 | -1,7 | 5,1 | 43 |
| 3-jan  | 80 | 3,6 | -1,8 | 5,4 | 46 |
| 4-jan  | 81 | 3,6 | -1,9 | 5,5 | 43 |
| 4-jan  | 82 | 3,4 | -1,7 | 5,1 | 44 |
| 4-jan  | 83 | 3,6 | -1,8 | 5,4 | 44 |

|        |     |     |      |     |    |
|--------|-----|-----|------|-----|----|
| 4-jan  | 84  | 3,2 | -1,6 | 4,8 | 45 |
| 4-jan  | 85  | 4,1 | -1,4 | 5,5 | 53 |
| 4-jan  | 86  | 4   | -1,5 | 5,5 | 42 |
| 4-jan  | 87  | 3,9 | -1,2 | 5,1 | 45 |
| 4-jan  | 88  | 3,7 | -1,4 | 5,1 | 43 |
| 4-jan  | 89  | 3,5 | -1,7 | 5,2 | 45 |
| 4-jan  | 90  | 3,4 | -1,5 | 4,9 | 45 |
| 5-jan  | 91  | 3,7 | -1,8 | 5,5 | 48 |
| 5-jan  | 92  | 3,5 | -1,6 | 5,1 | 43 |
| 5-jan  | 93  | 3,8 | -1,4 | 5,2 | 43 |
| 5-jan  | 94  | 3,1 | -1,7 | 4,8 | 44 |
| 5-jan  | 95  | 3,7 | -1,6 | 5,3 | 45 |
| 5-jan  | 96  | 3   | -1,2 | 4,2 | 45 |
| 5-jan  | 97  | 3,4 | -1,3 | 4,7 | 45 |
| 5-jan  | 98  | 3,3 | -1,5 | 4,8 | 45 |
| 5-jan  | 99  | 3,8 | -1,8 | 5,6 | 45 |
| 5-jan  | 100 | 3,6 | -1,6 | 5,2 | 45 |
| 10-jan | 101 | 3,6 | -1,6 | 5,2 | 43 |
| 10-jan | 102 | 3,2 | -1,4 | 4,6 | 46 |
| 10-jan | 103 | 3,5 | -1,7 | 5,2 | 45 |
| 10-jan | 104 | 3,3 | -1,5 | 4,8 | 43 |
| 10-jan | 105 | 3,7 | -1,6 | 5,3 | 43 |
| 10-jan | 106 | 3,2 | -1,2 | 4,4 | 45 |
| 10-jan | 107 | 4,3 | -1,9 | 6,2 | 46 |
| 10-jan | 108 | 3,5 | -1,3 | 4,8 | 44 |
| 10-jan | 109 | 3,8 | -1,7 | 5,5 | 44 |
| 10-jan | 110 | 3,3 | -1,5 | 4,8 | 45 |
| 12-jan | 111 | 3,4 | -1,7 | 5,1 | 44 |
| 12-jan | 112 | 3,6 | -1,4 | 5   | 42 |
| 12-jan | 113 | 3,3 | -1,6 | 4,9 | 44 |
| 12-jan | 114 | 3,5 | -1,3 | 4,8 | 43 |
| 12-jan | 115 | 3,6 | -1,5 | 5,1 | 46 |
| 12-jan | 116 | 3,2 | -1,2 | 4,4 | 42 |
| 12-jan | 117 | 4,3 | -1,4 | 5,7 | 44 |
| 12-jan | 118 | 4,1 | -1,8 | 5,9 | 43 |
| 12-jan | 119 | 3,8 | -1,7 | 5,5 | 43 |
| 12-jan | 120 | 4   | -1,9 | 5,9 | 44 |
| 13-jan | 121 | 3,4 | -1,8 | 5,2 | 42 |
| 13-jan | 122 | 3,2 | -1,6 | 4,8 | 42 |
| 13-jan | 123 | 3,5 | -1,3 | 4,8 | 41 |
| 13-jan | 124 | 3   | -1,7 | 4,7 | 45 |
| 13-jan | 125 | 3,3 | -1,2 | 4,5 | 45 |
| 13-jan | 126 | 3,9 | -1,4 | 5,3 | 45 |
| 13-jan | 127 | 3,7 | -1,6 | 5,3 | 46 |
| 13-jan | 128 | 3,4 | -1,5 | 4,9 | 46 |

|        |     |     |      |     |    |
|--------|-----|-----|------|-----|----|
| 13-jan | 129 | 3,1 | -1,2 | 4,3 | 44 |
| 13-jan | 130 | 3,5 | -1,4 | 4,9 | 45 |
| 16-jan | 131 | 3,9 | -1,5 | 5,4 | 43 |
| 16-jan | 132 | 3,6 | -1,7 | 5,3 | 43 |
| 16-jan | 133 | 3,8 | -1,9 | 5,7 | 44 |
| 16-jan | 134 | 3,5 | -1,4 | 4,9 | 47 |
| 16-jan | 135 | 4,4 | -1,6 | 6   | 42 |
| 16-jan | 136 | 4,2 | -1,2 | 5,4 | 42 |
| 16-jan | 137 | 3,8 | -1,3 | 5,1 | 44 |
| 16-jan | 138 | 4   | -1,4 | 5,4 | 43 |
| 16-jan | 139 | 4,3 | -1,6 | 5,9 | 42 |
| 16-jan | 140 | 3,7 | -1,7 | 5,4 | 45 |
| 17-jan | 141 | 3,8 | -1,4 | 5,2 | 45 |
| 17-jan | 142 | 3,6 | -1,6 | 5,2 | 45 |
| 17-jan | 143 | 3,4 | -1,8 | 5,2 | 45 |
| 17-jan | 144 | 3,9 | -1,4 | 5,3 | 43 |
| 17-jan | 145 | 3,8 | -1,6 | 5,4 | 44 |
| 17-jan | 146 | 3,5 | -1,3 | 4,8 | 45 |
| 17-jan | 147 | 4,1 | -1,7 | 5,8 | 44 |
| 17-jan | 148 | 4,3 | -1,5 | 5,8 | 44 |
| 17-jan | 149 | 3,7 | -1,3 | 5   | 45 |
| 17-jan | 150 | 3,5 | -1,2 | 4,7 | 45 |
| 18-jan | 151 | 3,2 | -1,3 | 4,5 | 48 |
| 18-jan | 152 | 3,7 | -1,5 | 5,2 | 49 |
| 18-jan | 153 | 3,6 | -1,7 | 5,3 | 35 |
| 18-jan | 154 | 3,3 | -1,2 | 4,5 | 28 |
| 18-jan | 155 | 3,4 | -1,7 | 5,1 | 27 |
| 18-jan | 156 | 3,5 | -1,3 | 4,8 | 44 |
| 18-jan | 157 | 3,4 | -1,5 | 4,9 | 32 |
| 18-jan | 158 | 3,8 | -1,4 | 5,2 | 40 |
| 18-jan | 159 | 3,4 | -1,6 | 5   | 41 |
| 18-jan | 160 | 3,2 | -1,4 | 4,6 | 30 |
| 20-jan | 161 | 3,6 | -1,7 | 5,3 | 45 |
| 20-jan | 162 | 3,1 | -1,6 | 4,7 | 45 |
| 20-jan | 163 | 3,4 | -1,8 | 5,2 | 43 |
| 20-jan | 164 | 3,3 | -1,4 | 4,7 | 42 |
| 20-jan | 165 | 3,8 | -1,6 | 5,4 | 44 |
| 20-jan | 166 | 3,2 | -1,7 | 4,9 | 45 |
| 20-jan | 167 | 4,1 | -1,4 | 5,5 | 44 |
| 20-jan | 168 | 3,9 | -1,5 | 5,4 | 44 |
| 20-jan | 169 | 3,7 | -1,3 | 5   | 45 |
| 20-jan | 170 | 3,5 | -1,4 | 4,9 | 55 |
| 23-jan | 171 | 3,6 | -1,8 | 5,4 | 42 |
| 23-jan | 172 | 3,4 | -1,6 | 5   | 44 |
| 23-jan | 173 | 3,6 | -1,4 | 5   | 44 |

|        |     |     |      |     |    |
|--------|-----|-----|------|-----|----|
| 23-jan | 174 | 3,2 | -1,9 | 5,1 | 45 |
| 23-jan | 175 | 4,1 | -1,4 | 5,5 | 43 |
| 23-jan | 176 | 4   | -1,5 | 5,5 | 42 |
| 23-jan | 177 | 3,9 | -1,3 | 5,2 | 45 |
| 23-jan | 178 | 3,7 | -1,4 | 5,1 | 43 |
| 23-jan | 179 | 3,5 | -1,7 | 5,2 | 45 |
| 23-jan | 180 | 3,6 | -1,2 | 4,8 | 44 |
| 26-jan | 181 | 3,5 | -1,5 | 5   | 42 |
| 26-jan | 182 | 3,4 | -1,3 | 4,7 | 44 |
| 26-jan | 183 | 3,7 | -1,9 | 5,6 | 41 |
| 26-jan | 184 | 3,3 | -1,6 | 4,9 | 42 |
| 26-jan | 185 | 3,7 | -1,7 | 5,4 | 43 |
| 26-jan | 186 | 3,6 | -1,5 | 5,1 | 50 |
| 26-jan | 187 | 3   | -1,6 | 4,6 | 46 |
| 26-jan | 188 | 3,8 | -1,8 | 5,6 | 52 |
| 26-jan | 189 | 3,7 | -1,6 | 5,3 | 45 |
| 26-jan | 190 | 3,3 | -1,7 | 5   | 45 |
| 27-jan | 191 | 3,3 | -1,6 | 4,9 | 43 |
| 27-jan | 192 | 3,5 | -1,3 | 4,8 | 39 |
| 27-jan | 193 | 3,7 | -1,5 | 5,2 | 43 |
| 27-jan | 194 | 3,5 | -1,4 | 4,9 | 44 |
| 27-jan | 195 | 3,8 | -1,7 | 5,5 | 45 |
| 27-jan | 196 | 3,6 | -1,8 | 5,4 | 46 |
| 27-jan | 197 | 3,3 | -1,5 | 4,8 | 36 |
| 27-jan | 198 | 4,5 | -1,5 | 6   | 33 |
| 27-jan | 199 | 3,7 | -1,6 | 5,3 | 43 |
| 27-jan | 200 | 4,2 | -1,7 | 5,9 | 37 |
| 27-jan | 201 | 3,3 | -1,6 | 4,9 | 43 |
| 27-jan | 202 | 3,5 | -1,3 | 4,8 | 39 |
| 27-jan | 203 | 3,7 | -1,5 | 5,2 | 42 |
| 27-jan | 204 | 3,5 | -1,4 | 4,9 | 44 |
| 27-jan | 205 | 3,8 | -1,7 | 5,5 | 45 |
| 27-jan | 206 | 3,6 | -1,8 | 5,4 | 46 |
| 27-jan | 207 | 3,3 | -1,5 | 4,8 | 36 |
| 27-jan | 208 | 4,5 | -1,5 | 6   | 43 |
| 27-jan | 209 | 3,7 | -1,6 | 5,3 | 43 |
| 27-jan | 210 | 4,2 | -1,7 | 5,9 | 37 |
| 30-jan | 211 | 3,2 | -1,7 | 4,9 | 66 |
| 30-jan | 212 | 3,4 | -1,5 | 4,9 | 48 |
| 30-jan | 213 | 3,3 | -1,6 | 4,9 | 53 |
| 30-jan | 214 | 3,2 | -1,3 | 4,5 | 43 |
| 30-jan | 215 | 3,8 | -1,8 | 5,6 | 44 |
| 30-jan | 216 | 4   | -1,4 | 5,4 | 44 |
| 30-jan | 217 | 3,6 | -1,9 | 5,5 | 43 |
| 30-jan | 218 | 3,3 | -1,7 | 5   | 44 |



|               |     |     |      |     |    |
|---------------|-----|-----|------|-----|----|
| <b>30-jan</b> | 219 | 4,1 | -1,8 | 5,9 | 47 |
| <b>30-jan</b> | 220 | 4,3 | -1,6 | 5,9 | 42 |
| <b>2-feb</b>  | 221 | 3,4 | -1,5 | 4,9 | 43 |
| <b>2-feb</b>  | 222 | 3,6 | -1,7 | 5,3 | 43 |
| <b>2-feb</b>  | 223 | 3,8 | -1,9 | 5,7 | 44 |
| <b>2-feb</b>  | 224 | 3,5 | -1,4 | 4,9 | 47 |
| <b>2-feb</b>  | 225 | 4,4 | -1,6 | 6   | 52 |
| <b>2-feb</b>  | 226 | 4,2 | -1,2 | 5,4 | 42 |
| <b>2-feb</b>  | 227 | 3,8 | -1,3 | 5,1 | 44 |
| <b>2-feb</b>  | 228 | 4   | -1,4 | 5,4 | 43 |
| <b>2-feb</b>  | 229 | 4,3 | -1,6 | 5,9 | 42 |
| <b>2-feb</b>  | 230 | 3,7 | -1,7 | 5,4 | 45 |
| <b>9-feb</b>  | 231 | 3,6 | -1,8 | 5,4 | 46 |
| <b>9-feb</b>  | 232 | 3,8 | -1,6 | 5,4 | 46 |
| <b>9-feb</b>  | 233 | 3,5 | -1,7 | 5,2 | 48 |
| <b>9-feb</b>  | 234 | 3,7 | -1,9 | 5,6 | 46 |
| <b>9-feb</b>  | 235 | 4,1 | -1,5 | 5,6 | 47 |
| <b>9-feb</b>  | 236 | 3,4 | -1,4 | 4,8 | 44 |
| <b>9-feb</b>  | 237 | 3,6 | -2   | 5,6 | 45 |
| <b>9-feb</b>  | 238 | 4,4 | -1,2 | 5,6 | 45 |
| <b>9-feb</b>  | 239 | 4   | -1,5 | 5,5 | 47 |
| <b>9-feb</b>  | 240 | 3,7 | -1,7 | 5,4 | 45 |
| <b>10-feb</b> | 241 | 3,5 | -1,6 | 5,1 | 45 |
| <b>10-feb</b> | 242 | 3,7 | -1,4 | 5,1 | 45 |
| <b>10-feb</b> | 243 | 3,4 | -1,8 | 5,2 | 43 |
| <b>10-feb</b> | 244 | 3,9 | -1,4 | 5,3 | 42 |
| <b>10-feb</b> | 245 | 3,8 | -1,9 | 5,7 | 44 |
| <b>10-feb</b> | 246 | 3,6 | -1,7 | 5,3 | 45 |
| <b>10-feb</b> | 247 | 4,1 | -1,4 | 5,5 | 44 |
| <b>10-feb</b> | 248 | 3,9 | -1,5 | 5,4 | 44 |
| <b>10-feb</b> | 249 | 3,7 | -1,3 | 5   | 45 |
| <b>10-feb</b> | 250 | 3,4 | -1,2 | 4,6 | 45 |
| <b>10-feb</b> | 251 | 3,5 | -1,8 | 5,3 | 43 |
| <b>10-feb</b> | 252 | 3   | -1,4 | 4,4 | 46 |
| <b>10-feb</b> | 253 | 3,5 | -1,3 | 4,8 | 47 |
| <b>10-feb</b> | 254 | 3,2 | -1,3 | 4,5 | 43 |
| <b>10-feb</b> | 255 | 4,3 | -1,6 | 5,9 | 42 |
| <b>10-feb</b> | 256 | 4,2 | -1,5 | 5,7 | 43 |
| <b>10-feb</b> | 257 | 3,4 | -1,6 | 5   | 43 |
| <b>10-feb</b> | 258 | 3,6 | -1,3 | 4,9 | 39 |
| <b>10-feb</b> | 259 | 4   | -1,9 | 5,9 | 49 |
| <b>10-feb</b> | 260 | 4,5 | -1,7 | 6,2 | 39 |
| <b>14-feb</b> | 261 | 2,9 | -1,4 | 4,3 | 35 |
| <b>14-feb</b> | 262 | 3   | -1,8 | 4,8 | 40 |
| <b>14-feb</b> | 263 | 3,8 | -1,7 | 5,5 | 40 |

|               |     |     |      |     |    |
|---------------|-----|-----|------|-----|----|
| <b>14-feb</b> | 264 | 3,9 | -1,6 | 5,5 | 40 |
| <b>14-feb</b> | 265 | 3,2 | -1,7 | 4,9 | 35 |
| <b>14-feb</b> | 266 | 3,2 | -1,7 | 4,9 | 40 |
| <b>14-feb</b> | 267 | 3,1 | -1,4 | 4,5 | 47 |
| <b>14-feb</b> | 268 | 3,2 | -1,5 | 4,7 | 45 |
| <b>14-feb</b> | 269 | 3,6 | -1,7 | 5,3 | 55 |
| <b>14-feb</b> | 270 | 3   | -1,8 | 4,8 | 40 |
| <b>15-feb</b> | 271 | 3,4 | -1,7 | 5,1 | 40 |
| <b>15-feb</b> | 272 | 3,2 | -1,6 | 4,8 | 35 |
| <b>15-feb</b> | 273 | 4,8 | -1,5 | 6,3 | 48 |
| <b>15-feb</b> | 274 | 3,4 | -1,7 | 5,1 | 45 |
| <b>15-feb</b> | 275 | 3,7 | -1,5 | 5,2 | 40 |
| <b>15-feb</b> | 276 | 3,8 | -1,5 | 5,3 | 47 |
| <b>15-feb</b> | 277 | 3,3 | -1,7 | 5   | 42 |
| <b>15-feb</b> | 278 | 3   | -1,4 | 4,4 | 47 |
| <b>15-feb</b> | 279 | 3,4 | -1,8 | 5,2 | 45 |
| <b>15-feb</b> | 280 | 2,9 | -1,5 | 4,4 | 55 |
| <b>18-feb</b> | 281 | 3   | -1,7 | 4,7 | 40 |
| <b>18-feb</b> | 282 | 3,7 | -1,7 | 5,4 | 35 |
| <b>18-feb</b> | 283 | 3,4 | -1,5 | 4,9 | 49 |
| <b>18-feb</b> | 284 | 3,4 | -1,2 | 4,6 | 50 |
| <b>18-feb</b> | 285 | 3,7 | -1,5 | 5,2 | 42 |
| <b>18-feb</b> | 286 | 3,2 | -1,7 | 4,9 | 52 |
| <b>18-feb</b> | 287 | 3,5 | -1,8 | 5,3 | 40 |
| <b>18-feb</b> | 288 | 3,1 | -1,7 | 4,8 | 51 |
| <b>18-feb</b> | 289 | 3,3 | -1,8 | 5,1 | 46 |
| <b>18-feb</b> | 290 | 3,5 | -1,6 | 5,1 | 44 |
| <b>20-feb</b> | 291 | 3,2 | -1,7 | 4,9 | 66 |
| <b>20-feb</b> | 292 | 3,4 | -1,5 | 4,9 | 48 |
| <b>20-feb</b> | 293 | 3,3 | -1,6 | 4,9 | 53 |
| <b>20-feb</b> | 294 | 3,2 | -1,3 | 4,5 | 43 |
| <b>20-feb</b> | 295 | 3,8 | -1,8 | 5,6 | 44 |
| <b>20-feb</b> | 296 | 4   | -1,4 | 5,4 | 44 |
| <b>20-feb</b> | 297 | 3,6 | -1,9 | 5,5 | 43 |
| <b>20-feb</b> | 298 | 3,3 | -1,7 | 5   | 44 |
| <b>20-feb</b> | 299 | 4,1 | -1,8 | 5,9 | 47 |
| <b>20-feb</b> | 300 | 4,3 | -1,6 | 5,9 | 44 |
| <b>21-feb</b> | 301 | 3,7 | -1,6 | 5,3 | 44 |
| <b>21-feb</b> | 302 | 3,5 | -1,4 | 4,9 | 45 |
| <b>21-feb</b> | 303 | 3,9 | -1,7 | 5,6 | 42 |
| <b>21-feb</b> | 304 | 3,4 | -1,8 | 5,2 | 44 |
| <b>21-feb</b> | 305 | 3,2 | -1,5 | 4,7 | 42 |
| <b>21-feb</b> | 306 | 3,3 | -1,3 | 4,6 | 45 |
| <b>21-feb</b> | 307 | 3,1 | -1,6 | 4,7 | 44 |
| <b>21-feb</b> | 308 | 3,8 | -1,2 | 5   | 45 |

|               |     |     |      |     |    |
|---------------|-----|-----|------|-----|----|
| <b>21-feb</b> | 309 | 3,5 | -1,4 | 4,9 | 46 |
| <b>21-feb</b> | 310 | 3,3 | -1,8 | 5,1 | 44 |
| <b>22-feb</b> | 311 | 3,5 | -1,4 | 4,9 | 46 |
| <b>22-feb</b> | 312 | 3,3 | -1,5 | 4,8 | 47 |
| <b>22-feb</b> | 313 | 3,6 | -1,8 | 5,4 | 37 |
| <b>22-feb</b> | 314 | 3,2 | -1,7 | 4,9 | 30 |
| <b>22-feb</b> | 315 | 3   | -1,4 | 4,4 | 42 |
| <b>22-feb</b> | 316 | 3,4 | -1,7 | 5,1 | 47 |
| <b>22-feb</b> | 317 | 3,1 | -1,6 | 4,7 | 44 |
| <b>22-feb</b> | 318 | 3,5 | -1,5 | 5   | 45 |
| <b>22-feb</b> | 319 | 3,7 | -1,8 | 5,5 | 45 |
| <b>22-feb</b> | 320 | 3,5 | -1,7 | 5,2 | 40 |
| <b>24-feb</b> | 321 | 3,7 | -1,6 | 5,3 | 43 |
| <b>24-feb</b> | 322 | 3,5 | -1,3 | 4,8 | 43 |
| <b>24-feb</b> | 323 | 3,6 | -1,5 | 5,1 | 43 |
| <b>24-feb</b> | 324 | 3,4 | -1,4 | 4,8 | 38 |
| <b>24-feb</b> | 325 | 3,8 | -1,7 | 5,5 | 44 |
| <b>24-feb</b> | 326 | 3,6 | -1,8 | 5,4 | 42 |
| <b>24-feb</b> | 327 | 3,3 | -1,3 | 4,6 | 42 |
| <b>24-feb</b> | 328 | 3,4 | -1,5 | 4,9 | 41 |
| <b>24-feb</b> | 329 | 3,7 | -1,6 | 5,3 | 38 |
| <b>24-feb</b> | 330 | 3,5 | -1,7 | 5,2 | 41 |
| <b>27-feb</b> | 331 | 3,8 | -1,5 | 5,3 | 42 |
| <b>27-feb</b> | 332 | 3,4 | -1,7 | 5,1 | 44 |
| <b>27-feb</b> | 333 | 3,6 | -1,4 | 5   | 44 |
| <b>27-feb</b> | 334 | 3,2 | -1,9 | 5,1 | 45 |
| <b>27-feb</b> | 335 | 4,1 | -1,4 | 5,5 | 43 |
| <b>27-feb</b> | 336 | 4   | -1,5 | 5,5 | 42 |
| <b>27-feb</b> | 337 | 3,9 | -1,3 | 5,2 | 45 |
| <b>27-feb</b> | 338 | 3,7 | -1,4 | 5,1 | 43 |
| <b>27-feb</b> | 339 | 3,5 | -1,2 | 4,7 | 45 |
| <b>27-feb</b> | 340 | 3,3 | -1,7 | 5   | 44 |
| <b>28-feb</b> | 341 | 2,9 | -1,4 | 4,3 | 35 |
| <b>28-feb</b> | 342 | 3   | -1,8 | 4,8 | 40 |
| <b>28-feb</b> | 343 | 3,8 | -1,5 | 5,3 | 43 |
| <b>28-feb</b> | 344 | 3,9 | -1,6 | 5,5 | 43 |
| <b>28-feb</b> | 345 | 3,2 | -1,4 | 4,6 | 45 |
| <b>28-feb</b> | 346 | 3,5 | -1,9 | 5,4 | 44 |
| <b>28-feb</b> | 347 | 3,1 | -1,7 | 4,8 | 43 |
| <b>28-feb</b> | 348 | 3,2 | -1,5 | 4,7 | 41 |
| <b>28-feb</b> | 349 | 3,6 | -1,6 | 5,2 | 43 |
| <b>28-feb</b> | 350 | 3   | -1,8 | 4,8 | 43 |
| <b>1-mrt</b>  | 351 | 3,6 | -1,5 | 5,1 | 40 |
| <b>1-mrt</b>  | 352 | 3,4 | -1,8 | 5,2 | 35 |
| <b>1-mrt</b>  | 353 | 3,8 | -1,7 | 5,5 | 48 |

|       |     |     |      |     |    |
|-------|-----|-----|------|-----|----|
| 1-mrt | 354 | 3,6 | -1,5 | 5,1 | 43 |
| 1-mrt | 355 | 3,9 | -1,7 | 5,6 | 47 |
| 1-mrt | 356 | 3,6 | -1,7 | 5,3 | 47 |
| 1-mrt | 357 | 3,1 | -1,5 | 4,6 | 42 |
| 1-mrt | 358 | 3,2 | -1,6 | 4,8 | 50 |
| 1-mrt | 359 | 3,5 | -1,7 | 5,2 | 46 |
| 1-mrt | 360 | 3,7 | -1,4 | 5,1 | 57 |
| 2-mrt | 361 | 3,7 | -1,6 | 5,3 | 42 |
| 2-mrt | 362 | 3,5 | -1,4 | 4,9 | 45 |
| 2-mrt | 363 | 3,9 | -1,7 | 5,6 | 42 |
| 2-mrt | 364 | 3,4 | -1,8 | 5,2 | 44 |
| 2-mrt | 365 | 3,2 | -1,5 | 4,7 | 44 |
| 2-mrt | 366 | 3,6 | -1,3 | 4,9 | 45 |
| 2-mrt | 367 | 3,1 | -1,6 | 4,7 | 46 |
| 2-mrt | 368 | 3,8 | -1,2 | 5   | 43 |
| 2-mrt | 369 | 3,5 | -1,4 | 4,9 | 42 |
| 2-mrt | 370 | 3,7 | -1,6 | 5,3 | 44 |
| 3-mrt | 371 | 3,4 | -1,7 | 5,1 | 57 |
| 3-mrt | 372 | 3,8 | -1,8 | 5,6 | 45 |
| 3-mrt | 373 | 3,4 | -1,5 | 4,9 | 45 |
| 3-mrt | 374 | 3   | -1,7 | 4,7 | 40 |
| 3-mrt | 375 | 2,9 | -1,6 | 4,5 | 24 |
| 3-mrt | 376 | 3,8 | -1,6 | 5,4 | 50 |
| 3-mrt | 377 | 3,9 | -1,2 | 5,1 | 52 |
| 3-mrt | 378 | 3,8 | -1,4 | 5,2 | 42 |
| 3-mrt | 379 | 3,7 | -1,5 | 5,2 | 48 |
| 3-mrt | 380 | 3,9 | -1,4 | 5,3 | 57 |
| 7-mrt | 381 | 2,5 | -1,4 | 3,9 | 45 |
| 7-mrt | 382 | 3,7 | -1,3 | 5   | 30 |
| 7-mrt | 383 | 3,6 | -1,7 | 5,3 | 50 |
| 7-mrt | 384 | 3,3 | -1,7 | 5   | 45 |
| 7-mrt | 385 | 3,5 | -1,9 | 5,4 | 52 |
| 7-mrt | 386 | 3,5 | -1,9 | 5,4 | 45 |
| 7-mrt | 387 | 3,1 | -1,6 | 4,7 | 56 |
| 7-mrt | 388 | 3,1 | -1,6 | 4,7 | 46 |
| 7-mrt | 389 | 3   | -1,5 | 4,5 | 46 |
| 7-mrt | 390 | 3,2 | -1,7 | 4,9 | 72 |
| 9-mrt | 391 | 3,6 | -1,9 | 5,5 | 46 |
| 9-mrt | 392 | 3,8 | -1,6 | 5,4 | 46 |
| 9-mrt | 393 | 3,5 | -1,7 | 5,2 | 48 |
| 9-mrt | 394 | 3,7 | -1,9 | 5,6 | 46 |
| 9-mrt | 395 | 4,1 | -1,5 | 5,6 | 47 |
| 9-mrt | 396 | 3,4 | -1,4 | 4,8 | 44 |
| 9-mrt | 397 | 3,6 | -2   | 5,6 | 45 |
| 9-mrt | 398 | 4,4 | -1,2 | 5,6 | 45 |

|        |     |     |      |     |    |
|--------|-----|-----|------|-----|----|
| 9-mrt  | 399 | 4   | -1,5 | 5,5 | 47 |
| 9-mrt  | 400 | 3,7 | -1,7 | 5,4 | 45 |
| 11-mrt | 401 | 3,7 | -1,5 | 5,2 | 24 |
| 11-mrt | 402 | 3,8 | -1,6 | 5,4 | 48 |
| 11-mrt | 403 | 3   | -1,7 | 4,7 | 48 |
| 11-mrt | 404 | 3   | -1,5 | 4,5 | 39 |
| 11-mrt | 405 | 3,3 | -1,5 | 4,8 | 47 |
| 11-mrt | 406 | 4   | -1,3 | 5,3 | 46 |
| 11-mrt | 407 | 3,2 | -1,4 | 4,6 | 35 |
| 11-mrt | 408 | 3,4 | -1,5 | 4,9 | 46 |
| 11-mrt | 409 | 3,2 | -1,4 | 4,6 | 40 |
| 11-mrt | 410 | 4,3 | -1,5 | 5,8 | 44 |
| 12-mrt | 411 | 3,7 | -1,5 | 5,2 | 24 |
| 12-mrt | 412 | 3,8 | -1,7 | 5,5 | 48 |
| 12-mrt | 413 | 3   | -1,9 | 4,9 | 48 |
| 12-mrt | 414 | 3   | -1,5 | 4,5 | 39 |
| 12-mrt | 415 | 3,3 | -1,6 | 4,9 | 47 |
| 12-mrt | 416 | 4   | -1,8 | 5,8 | 46 |
| 12-mrt | 417 | 3,2 | -1,4 | 4,6 | 35 |
| 12-mrt | 418 | 3,4 | -1,2 | 4,6 | 46 |
| 12-mrt | 419 | 3,2 | -1,3 | 4,5 | 40 |
| 12-mrt | 420 | 4,3 | -1,5 | 5,8 | 44 |
| 13-mrt | 421 | 3,7 | -1,5 | 5,2 | 44 |
| 13-mrt | 422 | 3,8 | -1,7 | 5,5 | 48 |
| 13-mrt | 423 | 3,4 | -1,9 | 5,3 | 47 |
| 13-mrt | 424 | 3,5 | -1,5 | 5   | 48 |
| 13-mrt | 425 | 3,3 | -1,6 | 4,9 | 44 |
| 13-mrt | 426 | 4   | -1,8 | 5,8 | 45 |
| 13-mrt | 427 | 3,2 | -1,4 | 4,6 | 44 |
| 13-mrt | 428 | 3,4 | -1,2 | 4,6 | 47 |
| 13-mrt | 429 | 3,6 | -1,3 | 4,9 | 44 |
| 13-mrt | 430 | 4,1 | -1,5 | 5,6 | 46 |
|        |     |     |      |     |    |

**Nile Perch Fisheries Ltd. - Tanzania**

| Date   | Sample # | Start Temperature | End Temperature | Delta T° | Treatment duration (m) |
|--------|----------|-------------------|-----------------|----------|------------------------|
| 13-dec | 1        | 1,8               | -1              | 2,8      | 40                     |
| 15-dec | 2        | 1,6               | -1              | 2,6      | 40                     |
| 15-dec | 3        | 1,6               | -1              | 2,6      | 40                     |
| 16-dec | 4        | 1,6               | -0,8            | 2,4      | 40                     |
| 19-dec | 5        | 1,8               | -1              | 2,8      | 40                     |
| 24-dec | 6        | 1,9               | -0,9            | 2,8      | 35                     |
| 31-dec | 7        | 1,8               | -0,8            | 2,6      | 30                     |
| 3-jan  | 8        | 1,2               | -0,8            | 2        | 30                     |

|               |    |     |      |     |    |
|---------------|----|-----|------|-----|----|
| <b>7-jan</b>  | 9  | 1,8 | -0,9 | 2,7 | 30 |
| <b>12-jan</b> | 10 | 1,9 | -0,8 | 2,7 | 20 |
| <b>14-jan</b> | 11 | 1,8 | -0,9 | 2,7 | 30 |
| <b>17-jan</b> | 12 | 1,8 | -1   | 2,8 | 40 |
| <b>20-jan</b> | 13 | 1,5 | -0,9 | 2,4 | 40 |
| <b>28-jan</b> | 14 | 1,8 | -0,9 | 2,7 | 30 |
| <b>31-jan</b> | 15 | 1,4 | -1   | 2,4 | 50 |
| <b>3-feb</b>  | 16 | 1,9 | -1,1 | 3   | 40 |
| <b>4-feb</b>  | 17 | 1,7 | -0,9 | 2,6 | 40 |
| <b>10-feb</b> | 18 | 1,7 | -0,9 | 2,6 | 30 |
| <b>11-feb</b> | 19 | 1,9 | -0,9 | 2,8 | 30 |
| <b>14-feb</b> | 20 | 2   | -1,1 | 3,1 | 40 |
| <b>14-feb</b> | 21 | 1,8 | -0,9 | 2,7 | 30 |
| <b>17-feb</b> | 22 | 1,8 | -1,1 | 2,9 | 35 |
| <b>24-feb</b> | 23 | 1,6 | -1   | 2,6 | 35 |
| <b>28-feb</b> | 24 | 1,8 | -0,7 | 2,5 | 50 |
| <b>28-feb</b> | 25 | 1,7 | -0,9 | 2,6 | 30 |
| <b>3-mrt</b>  | 26 | 2   | -0,9 | 2,9 | 40 |
| <b>10-mrt</b> | 27 | 1,7 | -0,9 | 2,6 | 35 |
| <b>11-mrt</b> | 28 | 1,8 | -0,7 | 2,5 | 30 |
|               |    |     |      |     |    |

**Victoria Perch Ltd. - Tanzania**

| <b>Date</b>   | <b>Sample #</b> | <b>Start Temperature</b> | <b>End Temperature</b> | <b>Delta T°</b> | <b>Treatment duration (m)</b> |
|---------------|-----------------|--------------------------|------------------------|-----------------|-------------------------------|
| <b>7-dec</b>  | 1               | 0,6                      | -1,5                   | 2,1             | 49                            |
| <b>8-dec</b>  | 2               | 0,3                      | -1,4                   | 1,7             | 45                            |
| <b>13-dec</b> | 3               | 0,5                      | -1,5                   | 2               | 45                            |
| <b>15-dec</b> | 4               | 0,3                      | -1,8                   | 2,1             | 47                            |
| <b>17-dec</b> | 5               | 0,4                      | -1,6                   | 2               | 46                            |
| <b>20-dec</b> | 6               | 0,2                      | -1,5                   | 1,7             | 45                            |
| <b>21-dec</b> | 7               | 0,7                      | -1,7                   | 2,4             | 60                            |
| <b>22-dec</b> | 8               | 0,2                      | -1,8                   | 2               | 60                            |
| <b>24-dec</b> | 9               | 0,4                      | -1,6                   | 2               | 45                            |
| <b>27-dec</b> | 10              | 0,3                      | -1,4                   | 1,7             | 50                            |
| <b>28-dec</b> | 11              | 0,6                      | -1,5                   | 2,1             | 49                            |
| <b>29-dec</b> | 12              | 0,5                      | -1,5                   | 2               | 50                            |
| <b>3-jan</b>  | 13              | 0,5                      | -1,5                   | 2               | 45                            |
| <b>12-jan</b> | 14              | 0,2                      | -1,5                   | 1,7             | 55                            |
| <b>14-jan</b> | 15              | 0,1                      | -1,5                   | 1,6             | 55                            |
| <b>17-jan</b> | 16              | 0,4                      | -1,5                   | 1,9             | 45                            |
| <b>18-jan</b> | 17              | 0,3                      | -1,9                   | 2,2             | 45                            |
| <b>20-jan</b> | 18              | 0,3                      | -1,5                   | 1,8             | 55                            |
| <b>21-jan</b> | 19              | 0,1                      | -1,6                   | 1,7             | 55                            |
| <b>27-jan</b> | 20              | 0,6                      | -1,9                   | 2,5             | 55                            |
| <b>28-jan</b> | 21              | 0,1                      | -1,4                   | 1,5             | 55                            |

|               |    |     |      |     |    |
|---------------|----|-----|------|-----|----|
| <b>31-jan</b> | 22 | 0,1 | -1,7 | 1,8 | 55 |
| <b>1-feb</b>  | 23 | 0,2 | -1,5 | 1,7 | 55 |
| <b>4-feb</b>  | 24 | 0   | -1,6 | 1,6 | 55 |
| <b>7-feb</b>  | 25 | 0,5 | -1,5 | 2   | 45 |
| <b>8-feb</b>  | 26 | 0   | -1,9 | 1,9 | 55 |
| <b>10-feb</b> | 27 | 0   | -1,8 | 1,8 | 55 |
| <b>11-feb</b> | 28 | 0,1 | -1,6 | 1,7 | 55 |
| <b>14-feb</b> | 29 | 0,1 | -1,6 | 1,7 | 50 |
| <b>15-feb</b> | 30 | 0,2 | -1,6 | 1,8 | 55 |
| <b>17-feb</b> | 31 | 0,1 | -1,5 | 1,6 | 55 |
| <b>18-feb</b> | 32 | 0,2 | -1,8 | 2   | 55 |
| <b>21-feb</b> | 33 | 0,1 | -1,5 | 1,6 | 55 |
| <b>22-feb</b> | 34 | 0,2 | -1,5 | 1,7 | 55 |
| <b>24-feb</b> | 35 | 0   | -2   | 2   | 55 |
| <b>25-feb</b> | 36 | 0,5 | -1,6 | 2,1 | 55 |
| <b>28-feb</b> | 37 | 0   | -1,6 | 1,6 | 50 |
| <b>1-mrt</b>  | 38 | 0,2 | -1,8 | 2   | 55 |
| <b>3-mrt</b>  | 39 | 0,2 | -1,7 | 1,9 | 50 |
| <b>4-mrt</b>  | 40 | 0   | -1,5 | 1,5 | 55 |
| <b>11-mrt</b> | 41 | 0,2 | -1,6 | 1,8 | 50 |
| <b>11-mrt</b> | 42 | 0,2 | -1,6 | 1,8 | 50 |
| <b>14-mrt</b> | 43 | 0,4 | -1,5 | 1,9 | 55 |
|               |    |     |      |     |    |

**Fresh Perch Ltd. - Uganda**

| Date         | Sample # | Start Temperature | End Temperature | Delta T° | Treatment duration (m) |
|--------------|----------|-------------------|-----------------|----------|------------------------|
| <b>7-dec</b> | 1        | 1,8               | -1,3            | 3,1      | 31                     |
| <b>7-dec</b> | 2        | 2                 | -1,1            | 3,1      | 33                     |
| <b>7-dec</b> | 3        | 2                 | -1,1            | 3,1      | 33                     |
| <b>7-dec</b> | 4        | 1,6               | -1,1            | 2,7      | 30                     |
| <b>7-dec</b> | 5        | 1,3               | -1,2            | 2,5      | 31                     |
| <b>7-dec</b> | 6        | 1,6               | -1,4            | 3        | 31                     |
| <b>7-dec</b> | 7        | 1,9               | -1,2            | 3,1      | 32                     |
| <b>7-dec</b> | 8        | 2,1               | -1,1            | 3,2      | 29                     |
| <b>7-dec</b> | 9        | 1,8               | -1,1            | 2,9      | 32                     |
| <b>7-dec</b> | 10       | 2,2               | -1,2            | 3,4      | 32                     |
| <b>9-dec</b> | 11       | 2                 | -1,1            | 3,1      | 32                     |
| <b>9-dec</b> | 12       | 1,9               | -1,1            | 3        | 31                     |
| <b>9-dec</b> | 13       | 2                 | -1,1            | 3,1      | 32                     |
| <b>9-dec</b> | 14       | 2,1               | -1,1            | 3,2      | 33                     |
| <b>9-dec</b> | 15       | 2                 | -1              | 3        | 32                     |
| <b>9-dec</b> | 16       | 1,9               | -1,1            | 3        | 33                     |
| <b>9-dec</b> | 17       | 1,9               | -1,6            | 3,5      | 33                     |
| <b>9-dec</b> | 18       | 2,2               | -1,1            | 3,3      | 32                     |

|               |    |     |      |     |    |
|---------------|----|-----|------|-----|----|
| <b>9-dec</b>  | 19 | 1,9 | -1,2 | 3,1 | 32 |
| <b>9-dec</b>  | 20 | 2,2 | -1,4 | 3,6 | 32 |
| <b>20-dec</b> | 21 | 2,2 | -1,2 | 3,4 | 31 |
| <b>20-dec</b> | 22 | 2   | -1   | 3   | 32 |
| <b>20-dec</b> | 23 | 1,9 | -1,2 | 3,1 | 32 |
| <b>20-dec</b> | 24 | 1,9 | -1,1 | 3   | 33 |
| <b>20-dec</b> | 25 | 1,9 | -1   | 2,9 | 32 |
| <b>20-dec</b> | 26 | 1,5 | -1,1 | 2,6 | 32 |
| <b>20-dec</b> | 27 | 1,9 | -1   | 2,9 | 33 |
| <b>20-dec</b> | 28 | 1,9 | -1,1 | 3   | 32 |
| <b>20-dec</b> | 29 | 1,7 | -1,1 | 2,8 | 32 |
| <b>20-dec</b> | 30 | 2,6 | -1   | 3,6 | 33 |
| <b>27-dec</b> | 31 | 1,3 | -1,1 | 2,4 | 32 |
| <b>27-dec</b> | 32 | 1,1 | -1,1 | 2,2 | 32 |
| <b>27-dec</b> | 33 | 1,8 | -1   | 2,8 | 33 |
| <b>27-dec</b> | 34 | 2,1 | -1   | 3,1 | 32 |
| <b>27-dec</b> | 35 | 2,2 | -1,1 | 3,3 | 32 |
| <b>27-dec</b> | 36 | 1,9 | -0,8 | 2,7 | 31 |
| <b>27-dec</b> | 37 | 1,9 | -0,9 | 2,8 | 32 |
| <b>27-dec</b> | 38 | 1,9 | -1   | 2,9 | 33 |
| <b>27-dec</b> | 39 | 1,9 | -1,1 | 3   | 32 |
| <b>27-dec</b> | 40 | 2,5 | -1   | 3,5 | 30 |
| <b>9-jan</b>  | 41 | 1,6 | -1,1 | 2,7 | 32 |
| <b>9-jan</b>  | 42 | 2   | -1,1 | 3,1 | 33 |
| <b>9-jan</b>  | 43 | 1,8 | -1,3 | 3,1 | 34 |
| <b>9-jan</b>  | 44 | 1,7 | -1,3 | 3   | 32 |
| <b>9-jan</b>  | 45 | 2,1 | -1,1 | 3,2 | 34 |
| <b>9-jan</b>  | 46 | 1,9 | -1,1 | 3   | 33 |
| <b>9-jan</b>  | 47 | 1,8 | -1,2 | 3   | 32 |
| <b>9-jan</b>  | 48 | 2   | -1,3 | 3,3 | 33 |
| <b>9-jan</b>  | 49 | 1,9 | -1,1 | 3   | 33 |
| <b>9-jan</b>  | 50 | 1,5 | -0,8 | 2,3 | 32 |
| <b>11-jan</b> | 51 | 1,8 | -1,1 | 2,9 | 31 |
| <b>11-jan</b> | 52 | 2   | -1,1 | 3,1 | 32 |
| <b>11-jan</b> | 53 | 2,2 | -1,1 | 3,3 | 32 |
| <b>11-jan</b> | 54 | 2,2 | -1,5 | 3,7 | 33 |
| <b>11-jan</b> | 55 | 1,9 | -1,1 | 3   | 32 |
| <b>11-jan</b> | 56 | 2,4 | -1,2 | 3,6 | 32 |
| <b>11-jan</b> | 57 | 2   | -1,2 | 3,2 | 33 |
| <b>11-jan</b> | 58 | 1,8 | -1,1 | 2,9 | 33 |
| <b>11-jan</b> | 59 | 2   | -1,1 | 3,1 | 32 |
| <b>11-jan</b> | 60 | 1,7 | -1,4 | 3,1 | 33 |
| <b>12-jan</b> | 61 | 2   | -0,9 | 2,9 | 31 |
| <b>12-jan</b> | 62 | 1,9 | -1,1 | 3   | 33 |
| <b>12-jan</b> | 63 | 2,2 | -0,9 | 3,1 | 31 |



|        |     |     |      |     |    |
|--------|-----|-----|------|-----|----|
| 12-jan | 64  | 1,9 | -1   | 2,9 | 32 |
| 12-jan | 65  | 2,3 | -0,9 | 3,2 | 33 |
| 12-jan | 66  | 1,4 | -1,1 | 2,5 | 33 |
| 12-jan | 67  | 1,3 | -1,1 | 2,4 | 32 |
| 12-jan | 68  | 2,4 | -1,1 | 3,5 | 32 |
| 12-jan | 69  | 2,3 | -1   | 3,3 | 32 |
| 12-jan | 70  | 1,9 | -1,1 | 3   | 31 |
| 14-jan | 71  | 1,8 | -1   | 2,8 | 33 |
| 14-jan | 72  | 1,6 | -1   | 2,6 | 33 |
| 14-jan | 73  | 2,7 | -1   | 3,7 | 33 |
| 14-jan | 74  | 1,5 | -1,2 | 2,7 | 33 |
| 14-jan | 75  | 2,1 | -0,8 | 2,9 | 32 |
| 14-jan | 76  | 1,8 | -1,1 | 2,9 | 32 |
| 14-jan | 77  | 2,1 | -1   | 3,1 | 32 |
| 14-jan | 78  | 1,7 | -1,1 | 2,8 | 32 |
| 14-jan | 79  | 1,3 | -0,9 | 2,2 | 33 |
| 14-jan | 80  | 1,9 | -1,1 | 3   | 31 |
| 16-jan | 81  | 2,2 | -1   | 3,2 | 34 |
| 16-jan | 82  | 1,3 | -1   | 2,3 | 27 |
| 16-jan | 83  | 2,6 | -1   | 3,6 | 34 |
| 16-jan | 84  | 2,2 | -0,8 | 3   | 32 |
| 16-jan | 85  | 1,6 | -1   | 2,6 | 34 |
| 16-jan | 86  | 1,9 | -0,8 | 2,7 | 33 |
| 16-jan | 87  | 2   | -0,6 | 2,6 | 32 |
| 16-jan | 88  | 2   | -1   | 3   | 33 |
| 16-jan | 89  | 2   | -0,8 | 2,8 | 33 |
| 16-jan | 90  | 2   | -0,8 | 2,8 | 32 |
| 17-jan | 91  | 2,3 | -0,8 | 3,1 | 31 |
| 17-jan | 92  | 1,4 | -0,6 | 2   | 32 |
| 17-jan | 93  | 1,9 | -1,4 | 3,3 | 32 |
| 17-jan | 94  | 2,6 | -0,8 | 3,4 | 33 |
| 17-jan | 95  | 2   | -0,6 | 2,6 | 32 |
| 17-jan | 96  | 2   | -0,8 | 2,8 | 32 |
| 17-jan | 97  | 2   | -0,6 | 2,6 | 33 |
| 17-jan | 98  | 2,2 | -1   | 3,2 | 32 |
| 17-jan | 99  | 1,9 | -0,6 | 2,5 | 32 |
| 17-jan | 100 | 1,7 | -0,8 | 2,5 | 33 |
| 18-jan | 101 | 2,2 | -0,8 | 3   | 31 |
| 18-jan | 102 | 2,1 | -0,6 | 2,7 | 32 |
| 18-jan | 103 | 2,1 | -0,6 | 2,7 | 32 |
| 18-jan | 104 | 2,3 | -0,6 | 2,9 | 33 |
| 18-jan | 105 | 2,9 | -0,6 | 3,5 | 32 |
| 18-jan | 106 | 2,2 | -0,6 | 2,8 | 32 |
| 18-jan | 107 | 1,6 | -1,8 | 3,4 | 33 |
| 18-jan | 108 | 1,9 | -1   | 2,9 | 33 |

|        |     |     |      |     |    |
|--------|-----|-----|------|-----|----|
| 18-jan | 109 | 1,9 | -1,1 | 3   | 32 |
| 18-jan | 110 | 1,4 | -1,1 | 2,5 | 33 |
| 21-jan | 111 | 1,9 | -0,8 | 2,7 | 32 |
| 21-jan | 112 | 2,3 | -1,1 | 3,4 | 32 |
| 21-jan | 113 | 2,2 | -1,1 | 3,3 | 33 |
| 21-jan | 114 | 1,7 | -1,4 | 3,1 | 32 |
| 21-jan | 115 | 2,3 | -1,1 | 3,4 | 34 |
| 21-jan | 116 | 2,9 | -1,2 | 4,1 | 32 |
| 21-jan | 117 | 2   | -1,6 | 3,6 | 32 |
| 21-jan | 118 | 1,7 | -1,4 | 3,1 | 32 |
| 21-jan | 119 | 2,2 | -1   | 3,2 | 33 |
| 21-jan | 120 | 2   | -1,6 | 3,6 | 31 |
| 23-jan | 121 | 1,5 | -1   | 2,5 | 32 |
| 23-jan | 122 | 2,4 | -1,6 | 4   | 32 |
| 23-jan | 123 | 1,9 | -2   | 3,9 | 32 |
| 23-jan | 124 | 1,3 | -1   | 2,3 | 31 |
| 23-jan | 125 | 1,7 | -1   | 2,7 | 32 |
| 23-jan | 126 | 2   | -0,6 | 2,6 | 29 |
| 23-jan | 127 | 1,5 | -1,1 | 2,6 | 31 |
| 23-jan | 128 | 1,2 | -1   | 2,2 | 31 |
| 23-jan | 129 | 1,4 | -1,8 | 3,2 | 32 |
| 23-jan | 130 | 1,9 | -1,6 | 3,5 | 32 |
| 26-jan | 131 | 1,7 | -1,1 | 2,8 | 32 |
| 26-jan | 132 | 1,8 | -1,1 | 2,9 | 32 |
| 26-jan | 133 | 1,6 | -1   | 2,6 | 32 |
| 26-jan | 134 | 1,9 | -1   | 2,9 | 31 |
| 26-jan | 135 | 1,9 | -1,1 | 3   | 32 |
| 26-jan | 136 | 2,2 | -1   | 3,2 | 29 |
| 26-jan | 137 | 1,7 | -1,2 | 2,9 | 31 |
| 26-jan | 138 | 2   | -1,4 | 3,4 | 31 |
| 26-jan | 139 | 2   | -1   | 3   | 32 |
| 26-jan | 140 | 1,2 | -1,2 | 2,4 | 32 |
| 26-jan | 141 | 1,7 | -1,1 | 2,8 | 32 |
| 26-jan | 142 | 1,8 | -1,1 | 2,9 | 32 |
| 26-jan | 143 | 1,6 | -1   | 2,6 | 32 |
| 26-jan | 144 | 1,9 | -1   | 2,9 | 31 |
| 26-jan | 145 | 1,9 | -1   | 2,9 | 32 |
| 26-jan | 146 | 2,2 | -1   | 3,2 | 29 |
| 26-jan | 147 | 1,7 | -1,2 | 2,9 | 31 |
| 26-jan | 148 | 2   | -1,4 | 3,4 | 31 |
| 26-jan | 149 | 2   | -1   | 3   | 32 |
| 26-jan | 150 | 1,2 | -1,2 | 2,4 | 32 |
| 29-jan | 151 | 2,2 | -1,8 | 4   | 31 |
| 29-jan | 152 | 2,5 | -1,6 | 4,1 | 32 |
| 29-jan | 153 | 2,8 | -1,1 | 3,9 | 32 |

|               |     |     |      |     |    |
|---------------|-----|-----|------|-----|----|
| <b>29-jan</b> | 154 | 2,5 | -1,5 | 4   | 33 |
| <b>29-jan</b> | 155 | 2,7 | -1,1 | 3,8 | 32 |
| <b>29-jan</b> | 156 | 2,2 | -1,1 | 3,3 | 32 |
| <b>29-jan</b> | 157 | 1,5 | -1   | 2,5 | 33 |
| <b>29-jan</b> | 158 | 1,9 | -0,8 | 2,7 | 33 |
| <b>29-jan</b> | 159 | 2,6 | -2   | 4,6 | 32 |
| <b>29-jan</b> | 160 | 1,2 | -1,3 | 2,5 | 33 |
| <b>1-feb</b>  | 161 | 1,4 | -1,1 | 2,5 | 31 |
| <b>1-feb</b>  | 162 | 1,9 | -1,2 | 3,1 | 32 |
| <b>1-feb</b>  | 163 | 2   | -1   | 3   | 32 |
| <b>1-feb</b>  | 164 | 2,2 | -1   | 3,2 | 33 |
| <b>1-feb</b>  | 165 | 1,8 | -1   | 2,8 | 32 |
| <b>1-feb</b>  | 166 | 2,3 | -1,4 | 3,7 | 32 |
| <b>1-feb</b>  | 167 | 1,9 | -1   | 2,9 | 33 |
| <b>1-feb</b>  | 168 | 1,5 | -1,4 | 2,9 | 33 |
| <b>1-feb</b>  | 169 | 1,9 | -1   | 2,9 | 32 |
| <b>1-feb</b>  | 170 | 1,8 | -1,4 | 3,2 | 33 |
| <b>2-feb</b>  | 171 | 1,3 | -1,9 | 3,2 | 29 |
| <b>2-feb</b>  | 172 | 1,2 | -1,3 | 2,5 | 32 |
| <b>2-feb</b>  | 173 | 1,9 | -2,1 | 4   | 33 |
| <b>2-feb</b>  | 174 | 1,4 | -1,3 | 2,7 | 32 |
| <b>2-feb</b>  | 175 | 1,6 | -1,3 | 2,9 | 31 |
| <b>2-feb</b>  | 176 | 1,3 | -2   | 3,3 | 32 |
| <b>2-feb</b>  | 177 | 2   | -1,8 | 3,8 | 32 |
| <b>2-feb</b>  | 178 | 1,9 | -1,3 | 3,2 | 31 |
| <b>2-feb</b>  | 179 | 1,7 | -2,4 | 4,1 | 31 |
| <b>2-feb</b>  | 180 | 1,4 | -1,8 | 3,2 | 32 |
| <b>6-feb</b>  | 181 | 1,9 | -1   | 2,9 | 31 |
| <b>6-feb</b>  | 182 | 2,4 | -1,2 | 3,6 | 32 |
| <b>6-feb</b>  | 183 | 2,3 | -1   | 3,3 | 32 |
| <b>6-feb</b>  | 184 | 1,5 | -1,2 | 2,7 | 32 |
| <b>6-feb</b>  | 185 | 1,5 | -0,6 | 2,1 | 33 |
| <b>6-feb</b>  | 186 | 2,2 | -1   | 3,2 | 32 |
| <b>6-feb</b>  | 187 | 2   | -1   | 3   | 31 |
| <b>6-feb</b>  | 188 | 1,9 | -1,1 | 3   | 33 |
| <b>6-feb</b>  | 189 | 2,6 | -1   | 3,6 | 32 |
| <b>6-feb</b>  | 190 | 1,4 | -1,1 | 2,5 | 33 |
| <b>8-feb</b>  | 191 | 2,9 | -1,1 | 4   | 33 |
| <b>8-feb</b>  | 192 | 1,1 | -0,8 | 1,9 | 32 |
| <b>8-feb</b>  | 193 | 1,7 | -0,8 | 2,5 | 31 |
| <b>8-feb</b>  | 194 | 1,8 | -1,1 | 2,9 | 33 |
| <b>8-feb</b>  | 195 | 1,9 | -1   | 2,9 | 32 |
| <b>8-feb</b>  | 196 | 2,5 | -0,8 | 3,3 | 31 |
| <b>8-feb</b>  | 197 | 2,1 | -0,8 | 2,9 | 32 |
| <b>8-feb</b>  | 198 | 1,6 | -0,8 | 2,4 | 33 |

|               |     |     |      |     |    |
|---------------|-----|-----|------|-----|----|
| <b>8-feb</b>  | 199 | 2,2 | -1,1 | 3,3 | 32 |
| <b>8-feb</b>  | 200 | 1,9 | -0,8 | 2,7 | 32 |
| <b>9-feb</b>  | 201 | 2,1 | -0,8 | 2,9 | 32 |
| <b>9-feb</b>  | 202 | 2   | -1   | 3   | 32 |
| <b>9-feb</b>  | 203 | 1,6 | -1   | 2,6 | 32 |
| <b>9-feb</b>  | 204 | 1,9 | -0,8 | 2,7 | 31 |
| <b>9-feb</b>  | 205 | 2,2 | -1   | 3,2 | 31 |
| <b>9-feb</b>  | 206 | 1,9 | -0,8 | 2,7 | 31 |
| <b>9-feb</b>  | 207 | 2,2 | -1,4 | 3,6 | 33 |
| <b>9-feb</b>  | 208 | 1,4 | -0,9 | 2,3 | 32 |
| <b>9-feb</b>  | 209 | 2,2 | -0,9 | 3,1 | 31 |
| <b>9-feb</b>  | 210 | 1,7 | -0,9 | 2,6 | 34 |
| <b>13-feb</b> | 211 | 2   | -0,8 | 2,8 | 31 |
| <b>13-feb</b> | 212 | 2   | -1   | 3   | 32 |
| <b>13-feb</b> | 213 | 1,5 | -0,9 | 2,4 | 32 |
| <b>13-feb</b> | 214 | 1,8 | -0,9 | 2,7 | 32 |
| <b>13-feb</b> | 215 | 2,9 | -0,9 | 3,8 | 34 |
| <b>13-feb</b> | 216 | 2,3 | -1,7 | 4   | 32 |
| <b>13-feb</b> | 217 | 1,4 | -1   | 2,4 | 32 |
| <b>13-feb</b> | 218 | 1,9 | -1   | 2,9 | 32 |
| <b>13-feb</b> | 219 | 2,4 | -1   | 3,4 | 33 |
| <b>13-feb</b> | 220 | 1,8 | -1,2 | 3   | 32 |
| <b>15-feb</b> | 221 | 2,6 | -1,1 | 3,7 | 29 |
| <b>15-feb</b> | 222 | 2,1 | -1,1 | 3,2 | 30 |
| <b>15-feb</b> | 223 | 2,3 | -0,9 | 3,2 | 33 |
| <b>15-feb</b> | 224 | 2   | -0,9 | 2,9 | 32 |
| <b>15-feb</b> | 225 | 2,6 | -0,8 | 3,4 | 31 |
| <b>15-feb</b> | 226 | 2,2 | -1,5 | 3,7 | 34 |
| <b>15-feb</b> | 227 | 2,2 | -1   | 3,2 | 32 |
| <b>15-feb</b> | 228 | 1,8 | -1   | 2,8 | 31 |
| <b>15-feb</b> | 229 | 1,8 | -1,5 | 3,3 | 31 |
| <b>15-feb</b> | 230 | 2   | -1,2 | 3,2 | 32 |
| <b>16-feb</b> | 231 | 1,7 | -1,1 | 2,8 | 30 |
| <b>16-feb</b> | 232 | 2,1 | -0,9 | 3   | 32 |
| <b>16-feb</b> | 233 | 1,5 | -1   | 2,5 | 31 |
| <b>16-feb</b> | 234 | 2,2 | -0,7 | 2,9 | 33 |
| <b>16-feb</b> | 235 | 1,7 | -1,1 | 2,8 | 32 |
| <b>16-feb</b> | 236 | 2,6 | -1,1 | 3,7 | 31 |
| <b>16-feb</b> | 237 | 1,5 | -1,3 | 2,8 | 32 |
| <b>16-feb</b> | 238 | 1,9 | -1,1 | 3   | 33 |
| <b>16-feb</b> | 239 | 1,7 | -0,9 | 2,6 | 32 |
| <b>16-feb</b> | 240 | 1,7 | -1,1 | 2,8 | 32 |
| <b>17-feb</b> | 241 | 2   | -1,2 | 3,2 | 31 |
| <b>17-feb</b> | 242 | 1,9 | -1,1 | 3   | 32 |
| <b>17-feb</b> | 243 | 1,9 | -0,9 | 2,8 | 32 |

|               |     |     |      |     |    |
|---------------|-----|-----|------|-----|----|
| <b>17-feb</b> | 244 | 1,2 | -1,1 | 2,3 | 32 |
| <b>17-feb</b> | 245 | 2,2 | -1,4 | 3,6 | 34 |
| <b>17-feb</b> | 246 | 1,7 | -1,8 | 3,5 | 32 |
| <b>17-feb</b> | 247 | 1,9 | -1,1 | 3   | 32 |
| <b>17-feb</b> | 248 | 2,1 | -1,1 | 3,2 | 32 |
| <b>17-feb</b> | 249 | 1,3 | -1,2 | 2,5 | 33 |
| <b>17-feb</b> | 250 | 1,8 | -0,9 | 2,7 | 32 |
| <b>21-feb</b> | 251 | 1,8 | -1   | 2,8 | 31 |
| <b>21-feb</b> | 252 | 2,2 | -1,2 | 3,4 | 32 |
| <b>21-feb</b> | 253 | 1,7 | -1   | 2,7 | 32 |
| <b>21-feb</b> | 254 | 1,9 | -1,1 | 3   | 32 |
| <b>21-feb</b> | 255 | 1,9 | -0,8 | 2,7 | 30 |
| <b>21-feb</b> | 256 | 1,7 | -1   | 2,7 | 32 |
| <b>21-feb</b> | 257 | 2,2 | -1,2 | 3,4 | 32 |
| <b>21-feb</b> | 258 | 2   | -0,6 | 2,6 | 31 |
| <b>21-feb</b> | 259 | 2,6 | -1,1 | 3,7 | 32 |
| <b>21-feb</b> | 260 | 2   | -1,1 | 3,1 | 32 |
| <b>22-feb</b> | 261 | 2,1 | -1,7 | 3,8 | 33 |
| <b>22-feb</b> | 262 | 2,4 | -1,1 | 3,5 | 32 |
| <b>22-feb</b> | 263 | 2,4 | -0,6 | 3   | 31 |
| <b>22-feb</b> | 264 | 1,2 | -1,1 | 2,3 | 32 |
| <b>22-feb</b> | 265 | 2,9 | -0,6 | 3,5 | 31 |
| <b>22-feb</b> | 266 | 2,2 | -0,8 | 3   | 32 |
| <b>22-feb</b> | 267 | 2,6 | -1,1 | 3,7 | 31 |
| <b>22-feb</b> | 268 | 1,9 | -0,9 | 2,8 | 32 |
| <b>22-feb</b> | 269 | 1,9 | -0,9 | 2,8 | 31 |
| <b>22-feb</b> | 270 | 2,4 | -1,4 | 3,8 | 31 |
| <b>1-mrt</b>  | 271 | 1,6 | -1,1 | 2,7 | 32 |
| <b>1-mrt</b>  | 272 | 1,8 | -0,9 | 2,7 | 32 |
| <b>1-mrt</b>  | 273 | 2   | -0,8 | 2,8 | 31 |
| <b>1-mrt</b>  | 274 | 1,6 | -1,1 | 2,7 | 31 |
| <b>1-mrt</b>  | 275 | 1,8 | -1   | 2,8 | 32 |
| <b>1-mrt</b>  | 276 | 2,1 | -0,8 | 2,9 | 30 |
| <b>1-mrt</b>  | 277 | 1,9 | -0,6 | 2,5 | 31 |
| <b>1-mrt</b>  | 278 | 2,1 | -1,4 | 3,5 | 32 |
| <b>1-mrt</b>  | 279 | 2,2 | -0,6 | 2,8 | 30 |
| <b>1-mrt</b>  | 280 | 1,8 | -0,8 | 2,6 | 31 |
| <b>9-mrt</b>  | 281 | 2,3 | -1,1 | 3,4 | 32 |
| <b>9-mrt</b>  | 282 | 1,4 | -1   | 2,4 | 31 |
| <b>9-mrt</b>  | 283 | 2,4 | -0,8 | 3,2 | 30 |
| <b>9-mrt</b>  | 284 | 1,9 | -0,8 | 2,7 | 30 |
| <b>9-mrt</b>  | 285 | 1,3 | -1,1 | 2,4 | 32 |
| <b>9-mrt</b>  | 286 | 1   | -1,1 | 2,1 | 32 |
| <b>9-mrt</b>  | 287 | 1,4 | -1,1 | 2,5 | 32 |
| <b>9-mrt</b>  | 288 | 2   | -1   | 3   | 31 |

| 9-mrt                                         | 289      | 1,7               | -1,1            | 2,8      | 32                     |
|-----------------------------------------------|----------|-------------------|-----------------|----------|------------------------|
| 9-mrt                                         | 290      | 1,7               | -1,1            | 2,8      | 33                     |
| <b>Lake Eco Fish Processing Ltd. - Uganda</b> |          |                   |                 |          |                        |
| Date                                          | Sample # | Start Temperature | End Temperature | Delta T° | Treatment duration (m) |
| 12-dec                                        | 1        | 2,2               | -1              | 3,2      | 34                     |
| 12-dec                                        | 2        | 2,1               | -1,7            | 3,8      | 35                     |
| 12-dec                                        | 3        | 1,7               | -1,3            | 3        | 37                     |
| 12-dec                                        | 4        | 2                 | -1,4            | 3,4      | 41                     |
| 12-dec                                        | 5        | 1,9               | -1,7            | 3,6      | 51                     |
| 12-dec                                        | 6        | 1,7               | -1,2            | 2,9      | 53                     |
| 12-dec                                        | 7        | 1,9               | -1,8            | 3,7      | 60                     |
| 12-dec                                        | 8        | 1,3               | -1              | 2,3      | 62                     |
| 12-dec                                        | 9        | 1,7               | -1,2            | 2,9      | 64                     |
| 12-dec                                        | 10       | 2,4               | -1,5            | 3,9      | 71                     |
| 19-dec                                        | 11       | 1,9               | -1,5            | 3,4      | 33                     |
| 19-dec                                        | 12       | 2,1               | -1,2            | 3,3      | 32                     |
| 19-dec                                        | 13       | 2,3               | -1,4            | 3,7      | 27                     |
| 19-dec                                        | 14       | 0,9               | -1,6            | 2,5      | 34                     |
| 19-dec                                        | 15       | 2,5               | -1,3            | 3,8      | 30                     |
| 19-dec                                        | 16       | 1,4               | -1,5            | 2,9      | 26                     |
| 19-dec                                        | 17       | 2                 | -0,9            | 2,9      | 20                     |
| 19-dec                                        | 18       | 1,9               | -1,2            | 3,1      | 18                     |
| 19-dec                                        | 19       | 1,7               | -1,1            | 2,8      | 22                     |
| 19-dec                                        | 20       | 2,2               | -1,4            | 3,6      | 21                     |
| 2-jan                                         | 21       | 1,3               | -1,2            | 2,5      | 44                     |
| 2-jan                                         | 22       | 1,8               | -1,3            | 3,1      | 45                     |
| 2-jan                                         | 23       | 2,2               | -1,4            | 3,6      | 45                     |
| 2-jan                                         | 24       | 1,4               | -0,9            | 2,3      | 45                     |
| 2-jan                                         | 25       | 1,3               | -1,2            | 2,5      | 45                     |
| 2-jan                                         | 26       | 1,9               | -1,4            | 3,3      | 45                     |
| 2-jan                                         | 27       | 2,2               | -0,9            | 3,1      | 45                     |
| 2-jan                                         | 28       | 1,6               | -1,2            | 2,8      | 45                     |
| 9-jan                                         | 29       | 2                 | -1,2            | 3,2      | 45                     |
| 9-jan                                         | 30       | 2,2               | -1,6            | 3,8      | 45                     |
| 9-jan                                         | 31       | 1,9               | -1,5            | 3,4      | 45                     |
| 9-jan                                         | 32       | 2,2               | -1,3            | 3,5      | 53                     |
| 9-jan                                         | 33       | 1,4               | -1,4            | 2,8      | 45                     |
| 9-jan                                         | 34       | 2                 | -1,2            | 3,2      | 45                     |
| 9-jan                                         | 35       | 1,4               | -1,2            | 2,6      | 45                     |
| 9-jan                                         | 36       | 1,8               | -1,7            | 3,5      | 45                     |
| 9-jan                                         | 37       | 1,5               | -1,6            | 3,1      | 45                     |
| 9-jan                                         | 38       | 1,1               | -1,3            | 2,4      | 45                     |

|        |    |     |      |     |    |
|--------|----|-----|------|-----|----|
| 13-jan | 39 | 1,4 | -1,2 | 2,6 | 45 |
| 13-jan | 40 | 1,9 | -1,2 | 3,1 | 45 |
| 13-jan | 41 | 2   | -1,4 | 3,4 | 45 |
| 13-jan | 42 | 2   | -1,2 | 3,2 | 45 |
| 13-jan | 43 | 1,8 | -1,3 | 3,1 | 45 |
| 13-jan | 44 | 2,2 | -1,2 | 3,4 | 45 |
| 13-jan | 45 | 1,4 | -1,2 | 2,6 | 45 |
| 13-jan | 46 | 2   | -1,3 | 3,3 | 45 |
| 13-jan | 47 | 1,8 | -1,4 | 3,2 | 45 |
| 16-jan | 48 | 1,2 | -1,3 | 2,5 | 45 |
| 16-jan | 49 | 1,6 | -1,1 | 2,7 | 44 |
| 16-jan | 50 | 1,8 | -1,2 | 3   | 45 |
| 16-jan | 51 | 2   | -1,3 | 3,3 | 43 |
| 16-jan | 52 | 1,6 | -1,1 | 2,7 | 44 |
| 16-jan | 53 | 2,2 | -1,2 | 3,4 | 44 |
| 16-jan | 54 | 1,4 | -1,2 | 2,6 | 45 |
| 16-jan | 55 | 2   | -1,3 | 3,3 | 45 |
| 16-jan | 56 | 1,8 | -1,2 | 3   | 43 |
| 16-jan | 57 | 2   | -1,3 | 3,3 | 45 |
| 21-jan | 58 | 1,5 | -1,3 | 2,8 | 45 |
| 21-jan | 59 | 1,6 | -1,2 | 2,8 | 45 |
| 21-jan | 60 | 1,2 | -1,2 | 2,4 | 45 |
| 21-jan | 61 | 1,6 | -1,2 | 2,8 | 45 |
| 21-jan | 62 | 1,3 | -1,1 | 2,4 | 45 |
| 21-jan | 63 | 1,3 | -1,3 | 2,6 | 45 |
| 21-jan | 64 | 1,2 | -1,3 | 2,5 | 45 |
| 21-jan | 65 | 2   | -1,1 | 3,1 | 45 |
| 21-jan | 66 | 1,6 | -1,2 | 2,8 | 45 |
| 23-jan | 67 | 2,3 | -1,3 | 3,6 | 49 |
| 23-jan | 68 | 2,1 | -1,2 | 3,3 | 41 |
| 23-jan | 69 | 1,9 | -1,2 | 3,1 | 40 |
| 23-jan | 70 | 2,4 | -1,1 | 3,5 | 46 |
| 23-jan | 71 | 2   | -1,3 | 3,3 | 38 |
| 23-jan | 72 | 2,2 | -1,2 | 3,4 | 47 |
| 23-jan | 73 | 1,8 | -1,2 | 3   | 48 |
| 23-jan | 74 | 2   | -1,4 | 3,4 | 44 |
| 23-jan | 75 | 2,3 | -1,3 | 3,6 | 41 |
| 23-jan | 76 | 2,1 | -1,2 | 3,3 | 44 |
| 27-jan | 77 | 2,2 | -1,4 | 3,6 | 45 |
| 27-jan | 78 | 1,9 | -1,3 | 3,2 | 45 |
| 27-jan | 79 | 2   | -1,1 | 3,1 | 45 |
| 27-jan | 80 | 2,1 | -1,3 | 3,4 | 45 |
| 27-jan | 81 | 2   | -1,2 | 3,2 | 45 |
| 27-jan | 82 | 1,4 | -1,2 | 2,6 | 45 |
| 27-jan | 83 | 2,1 | -1,5 | 3,6 | 45 |

|               |     |     |      |     |    |
|---------------|-----|-----|------|-----|----|
| <b>27-jan</b> | 84  | 2,1 | -1,3 | 3,4 | 45 |
| <b>27-jan</b> | 85  | 1,2 | -1,2 | 2,4 | 45 |
| <b>30-jan</b> | 86  | 1,1 | -1,2 | 2,3 | 45 |
| <b>30-jan</b> | 87  | 2   | -1,4 | 3,4 | 45 |
| <b>30-jan</b> | 88  | 1,8 | -1,2 | 3   | 45 |
| <b>30-jan</b> | 89  | 2   | -1,3 | 3,3 | 45 |
| <b>30-jan</b> | 90  | 1,6 | -1,1 | 2,7 | 45 |
| <b>30-jan</b> | 91  | 2,2 | -1,2 | 3,4 | 45 |
| <b>30-jan</b> | 92  | 1,4 | -1,2 | 2,6 | 45 |
| <b>30-jan</b> | 93  | 2   | -1,3 | 3,3 | 45 |
| <b>30-jan</b> | 94  | 1,8 | -1,2 | 3   | 45 |
| <b>30-jan</b> | 95  | 2   | -1,3 | 3,3 | 45 |
| <b>3-feb</b>  | 96  | 1,4 | -1,2 | 2,6 | 45 |
| <b>3-feb</b>  | 97  | 2,1 | -1,2 | 3,3 | 45 |
| <b>3-feb</b>  | 98  | 2   | -1,3 | 3,3 | 45 |
| <b>3-feb</b>  | 99  | 2   | -1,1 | 3,1 | 45 |
| <b>3-feb</b>  | 100 | 1,6 | -1,3 | 2,9 | 45 |
| <b>3-feb</b>  | 101 | 2,2 | -1,2 | 3,4 | 45 |
| <b>3-feb</b>  | 102 | 1,4 | -1,4 | 2,8 | 45 |
| <b>3-feb</b>  | 103 | 2   | -1,2 | 3,2 | 45 |
| <b>3-feb</b>  | 104 | 1,8 | -1,2 | 3   | 45 |
| <b>3-feb</b>  | 105 | 2   | -1,1 | 3,1 | 45 |
| <b>6-feb</b>  | 106 | 2,1 | -1,7 | 3,8 | 45 |
| <b>6-feb</b>  | 107 | 2,2 | -1,2 | 3,4 | 45 |
| <b>6-feb</b>  | 108 | 1,9 | -1,5 | 3,4 | 45 |
| <b>6-feb</b>  | 109 | 2   | -1,3 | 3,3 | 45 |
| <b>6-feb</b>  | 110 | 1,7 | -1,2 | 2,9 | 45 |
| <b>6-feb</b>  | 111 | 2,1 | -1,2 | 3,3 | 45 |
| <b>6-feb</b>  | 112 | 2,2 | -1,1 | 3,3 | 45 |
| <b>6-feb</b>  | 113 | 2   | -1,2 | 3,2 | 48 |
| <b>6-feb</b>  | 114 | 1,8 | -1,2 | 3   | 49 |
| <b>6-feb</b>  | 115 | 2   | -1,1 | 3,1 | 47 |
| <b>10-feb</b> | 116 | 1,2 | -1,3 | 2,5 | 45 |
| <b>10-feb</b> | 117 | 1,8 | -1,1 | 2,9 | 45 |
| <b>10-feb</b> | 118 | 2,1 | -1,2 | 3,3 | 45 |
| <b>10-feb</b> | 119 | 2   | -1,3 | 3,3 | 45 |
| <b>10-feb</b> | 120 | 2,2 | -1,2 | 3,4 | 46 |
| <b>10-feb</b> | 121 | 1,9 | -1,3 | 3,2 | 45 |
| <b>10-feb</b> | 122 | 1,8 | -1,5 | 3,3 | 45 |
| <b>10-feb</b> | 123 | 2,1 | -1,2 | 3,3 | 45 |
| <b>10-feb</b> | 124 | 1,7 | -1,1 | 2,8 | 45 |
| <b>10-feb</b> | 125 | 2,2 | -1,4 | 3,6 | 45 |
| <b>17-feb</b> | 126 | 2,2 | -1,4 | 3,6 | 47 |
| <b>17-feb</b> | 127 | 2   | -1,2 | 3,2 | 45 |
| <b>17-feb</b> | 128 | 2,2 | -1,2 | 3,4 | 45 |



|               |     |     |      |     |    |
|---------------|-----|-----|------|-----|----|
| <b>17-feb</b> | 129 | 2,1 | -1,3 | 3,4 | 47 |
| <b>17-feb</b> | 130 | 2   | -1,2 | 3,2 | 48 |
| <b>17-feb</b> | 131 | 1,7 | -1,4 | 3,1 | 45 |
| <b>17-feb</b> | 132 | 1,8 | -1,2 | 3   | 45 |
| <b>17-feb</b> | 133 | 2,1 | -1,3 | 3,4 | 45 |
| <b>17-feb</b> | 134 | 1,9 | -1,1 | 3   | 45 |
| <b>17-feb</b> | 135 | 2   | -1,3 | 3,3 | 46 |
| <b>18-feb</b> | 136 | 2,4 | -1,2 | 3,6 | 47 |
| <b>18-feb</b> | 137 | 2,7 | -1,1 | 3,8 | 45 |
| <b>18-feb</b> | 138 | 2,8 | -1,2 | 4   | 48 |
| <b>18-feb</b> | 139 | 2,6 | -1,1 | 3,7 | 44 |
| <b>18-feb</b> | 140 | 2,9 | -1   | 3,9 | 45 |
| <b>18-feb</b> | 141 | 3,2 | -1,1 | 4,3 | 45 |
| <b>18-feb</b> | 142 | 3,1 | -1,2 | 4,3 | 47 |
| <b>18-feb</b> | 143 | 2,7 | -0,9 | 3,6 | 47 |
| <b>18-feb</b> | 144 | 3,6 | -1,1 | 4,7 | 44 |
| <b>18-feb</b> | 145 | 2,8 | -1   | 3,8 | 43 |
| <b>20-feb</b> | 146 | 2,3 | -1,2 | 3,5 | 45 |
| <b>20-feb</b> | 147 | 2   | -1,3 | 3,3 | 44 |
| <b>20-feb</b> | 148 | 2,5 | -1,2 | 3,7 | 46 |
| <b>20-feb</b> | 149 | 2,6 | -1,1 | 3,7 | 45 |
| <b>20-feb</b> | 150 | 2,8 | -1,2 | 4   | 46 |
| <b>20-feb</b> | 151 | 3   | -1,1 | 4,1 | 45 |
| <b>20-feb</b> | 152 | 3,4 | -1,2 | 4,6 | 45 |
| <b>20-feb</b> | 153 | 2,1 | -1,1 | 3,2 | 45 |
| <b>20-feb</b> | 154 | 3,3 | -1,1 | 4,4 | 45 |
| <b>20-feb</b> | 155 | 2   | -1,2 | 3,2 | 45 |
| <b>4-mrt</b>  | 156 | 2,3 | -1,1 | 3,4 | 32 |
| <b>4-mrt</b>  | 157 | 2,1 | -0,9 | 3   | 47 |
| <b>4-mrt</b>  | 158 | 2,7 | -1,2 | 3,9 | 48 |
| <b>4-mrt</b>  | 159 | 3,2 | -1,2 | 4,4 | 47 |
| <b>4-mrt</b>  | 160 | 3,4 | -1,3 | 4,7 | 46 |
| <b>4-mrt</b>  | 161 | 2   | -1,1 | 3,1 | 45 |
| <b>4-mrt</b>  | 162 | 3   | -1,3 | 4,3 | 48 |
| <b>4-mrt</b>  | 163 | 2,9 | -1,2 | 4,1 | 47 |
| <b>4-mrt</b>  | 164 | 2   | -1,3 | 3,3 | 47 |
| <b>4-mrt</b>  | 165 | 2,6 | -1,1 | 3,7 | 47 |
| <b>10-mrt</b> | 166 | 2,6 | -1,1 | 3,7 | 48 |
| <b>10-mrt</b> | 167 | 2   | -0,9 | 2,9 | 45 |
| <b>10-mrt</b> | 168 | 3,3 | -1,2 | 4,5 | 46 |
| <b>10-mrt</b> | 169 | 3,4 | -1,2 | 4,6 | 38 |
| <b>10-mrt</b> | 170 | 3,4 | -1,3 | 4,7 | 47 |
| <b>10-mrt</b> | 171 | 2   | -1,1 | 3,1 | 42 |
| <b>10-mrt</b> | 172 | 3   | -1,2 | 4,2 | 47 |
| <b>10-mrt</b> | 173 | 2,7 | -1,1 | 3,8 | 46 |

|               |     |     |      |     |    |
|---------------|-----|-----|------|-----|----|
| <b>10-mrt</b> | 174 | 2,4 | -0,9 | 3,3 | 45 |
| <b>10-mrt</b> | 175 | 2,2 | -1,2 | 3,4 | 47 |
| <b>19-dec</b> | 176 | 1,7 | -1,1 | 2,8 | 22 |
| <b>19-dec</b> | 177 | 2,2 | -1,4 | 3,6 | 21 |

*Table: Core fillet temperature at start and end superchilling phase, temperature difference between start and end superchilling phase and duration of superchilling. In total 968 samples gathered in the period December 2017 – March 2018. Source: Fiorital*

## A2.2 Data loggers

Graphs of dataloggers used in the company self-monitoring program are given in this Annex III.

Fresh Perch Ltd.

*Before superchilling*

Temperature[°C]

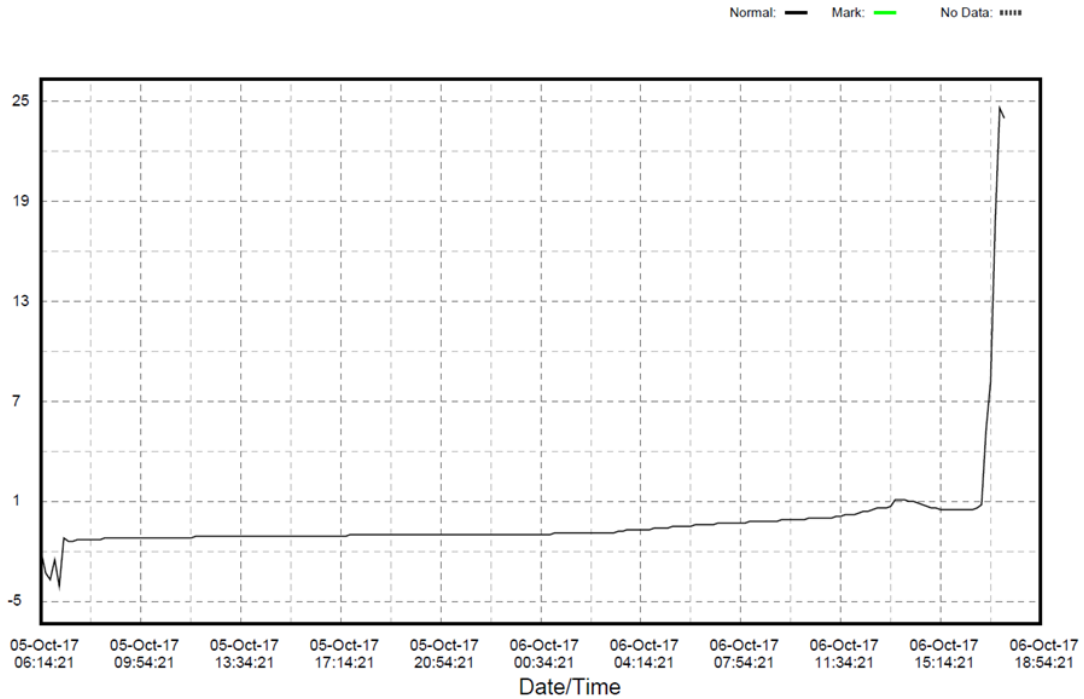

*After superchilling*

Temperature[°C]

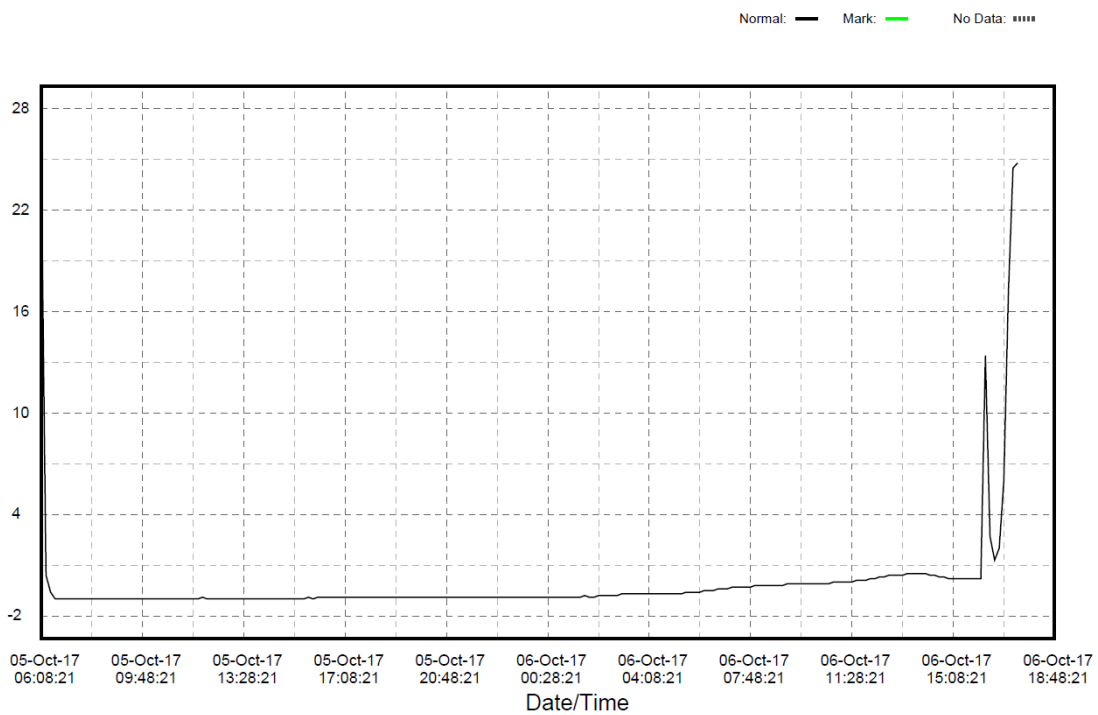

Nile Perch Fisheries Ltd.  
*Before superchilling*

Temperature[°C]

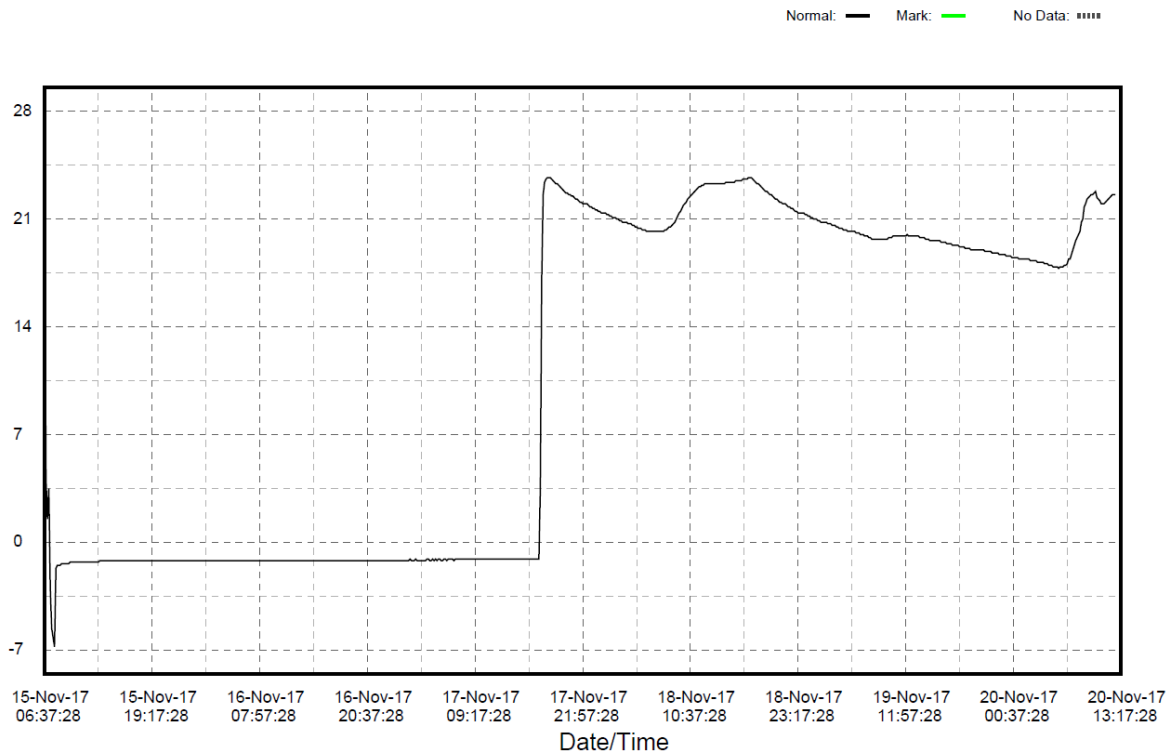

*After superchilling*

Temperature[°C]

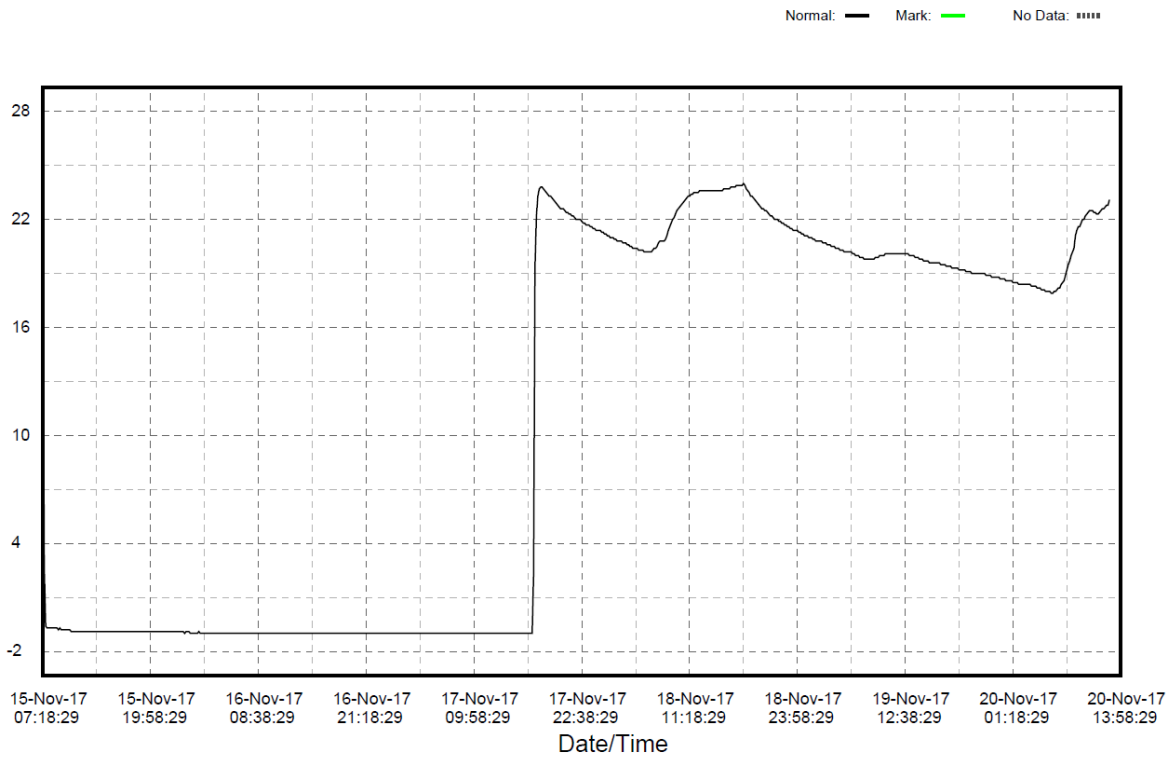

Lake Eco Fish Processing Ltd.  
*Before superchilling*

Temperature[°C]

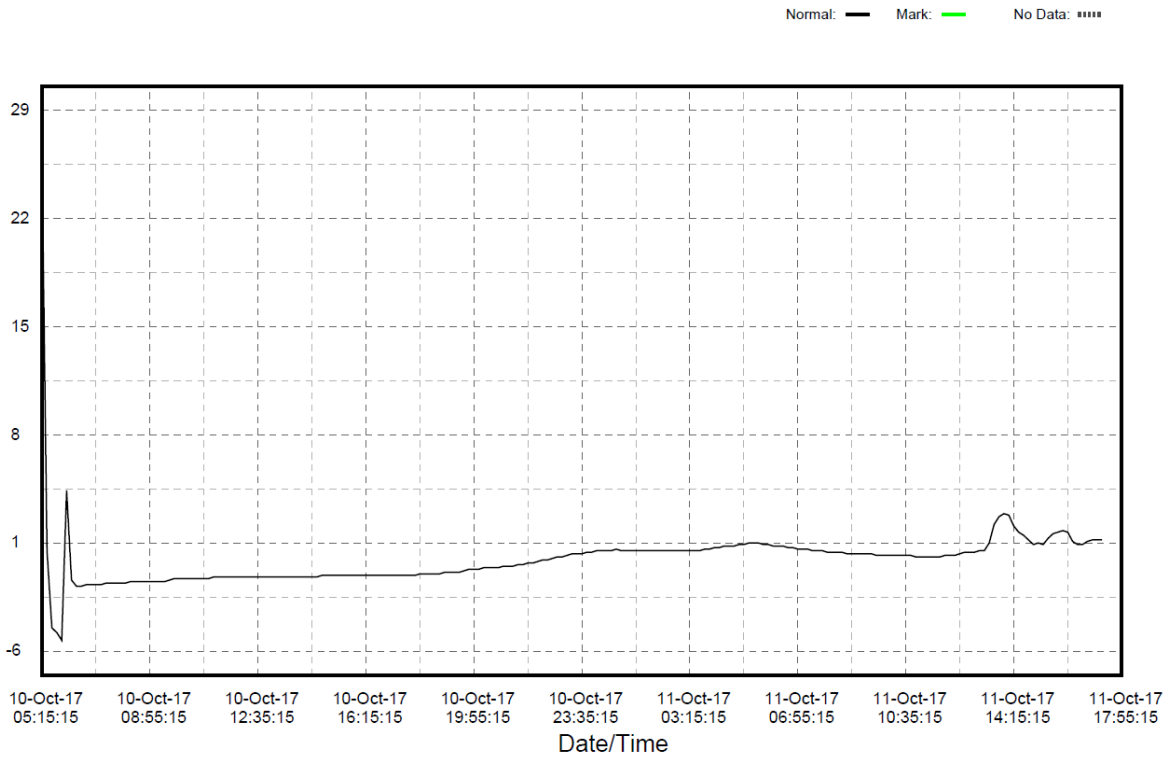

*After superchilling*

Temperature[°C]

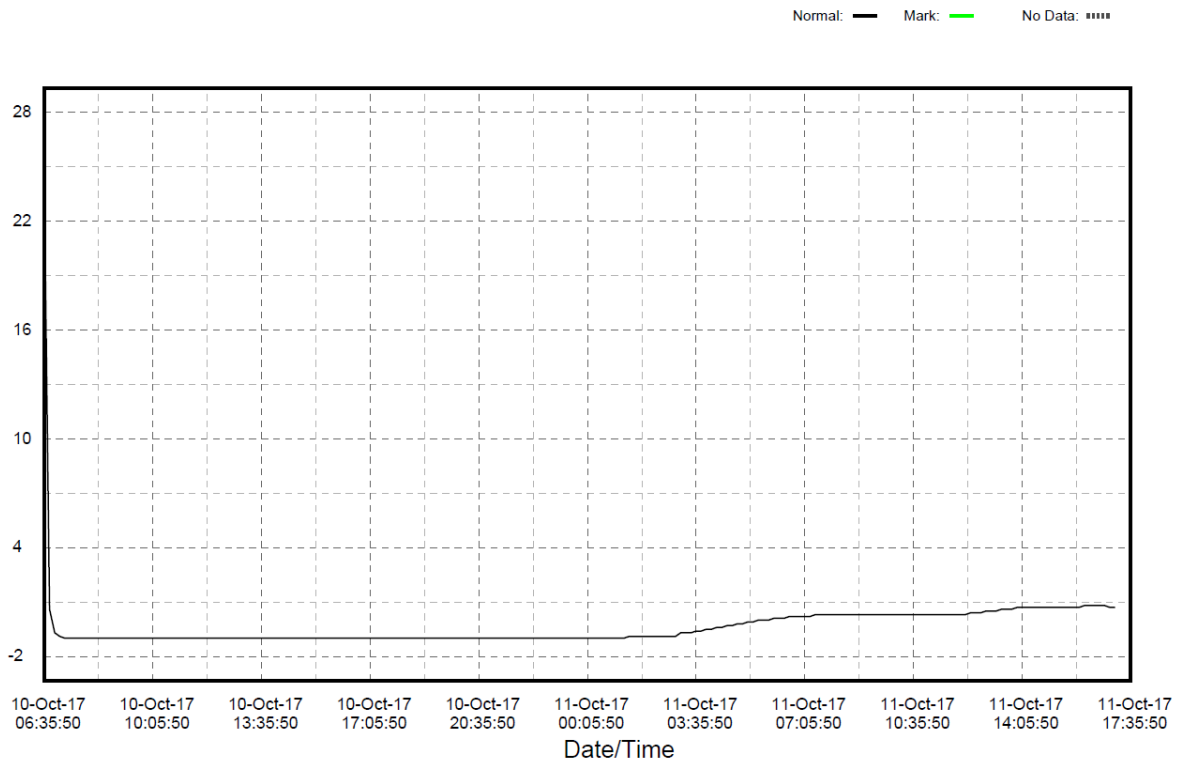

Supreme Perch Ltd.

*Before superchilling*

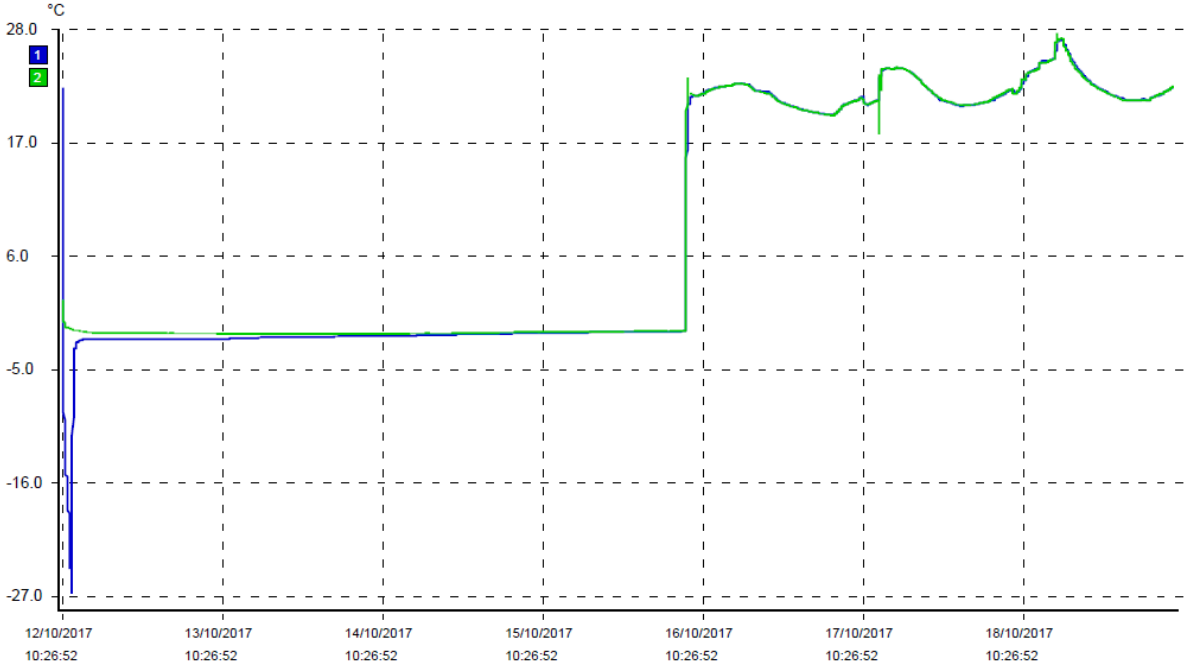

*After superchilling*

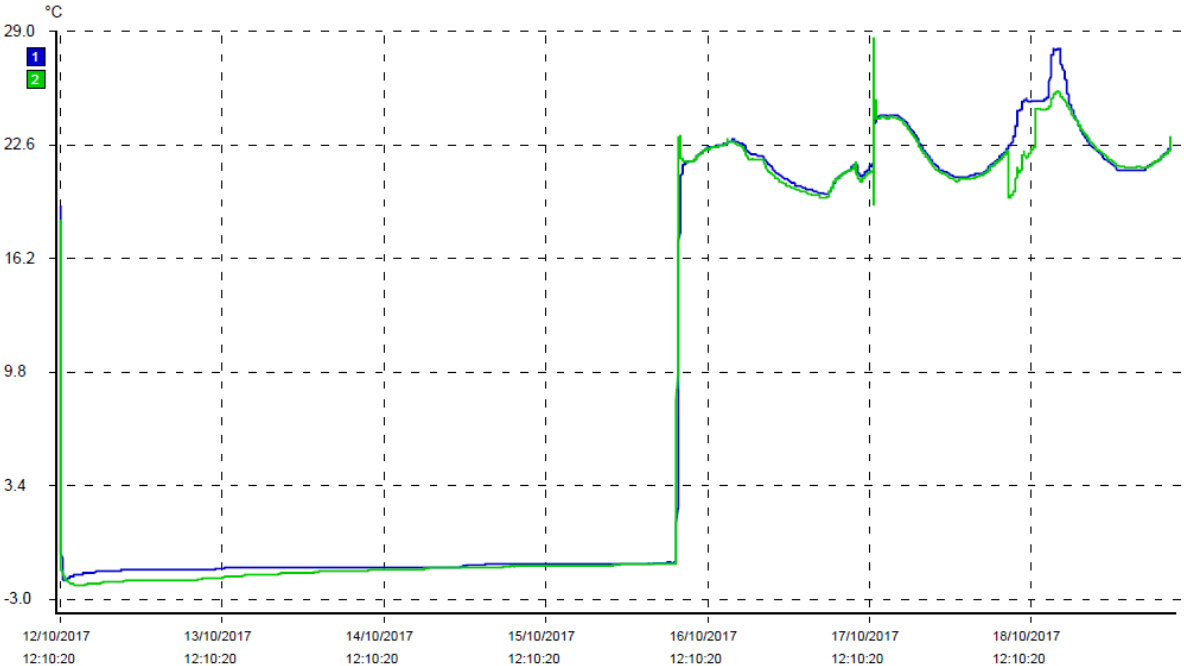

Victoria Perch Ltd.  
*After superchilling*

Temperature[°C]

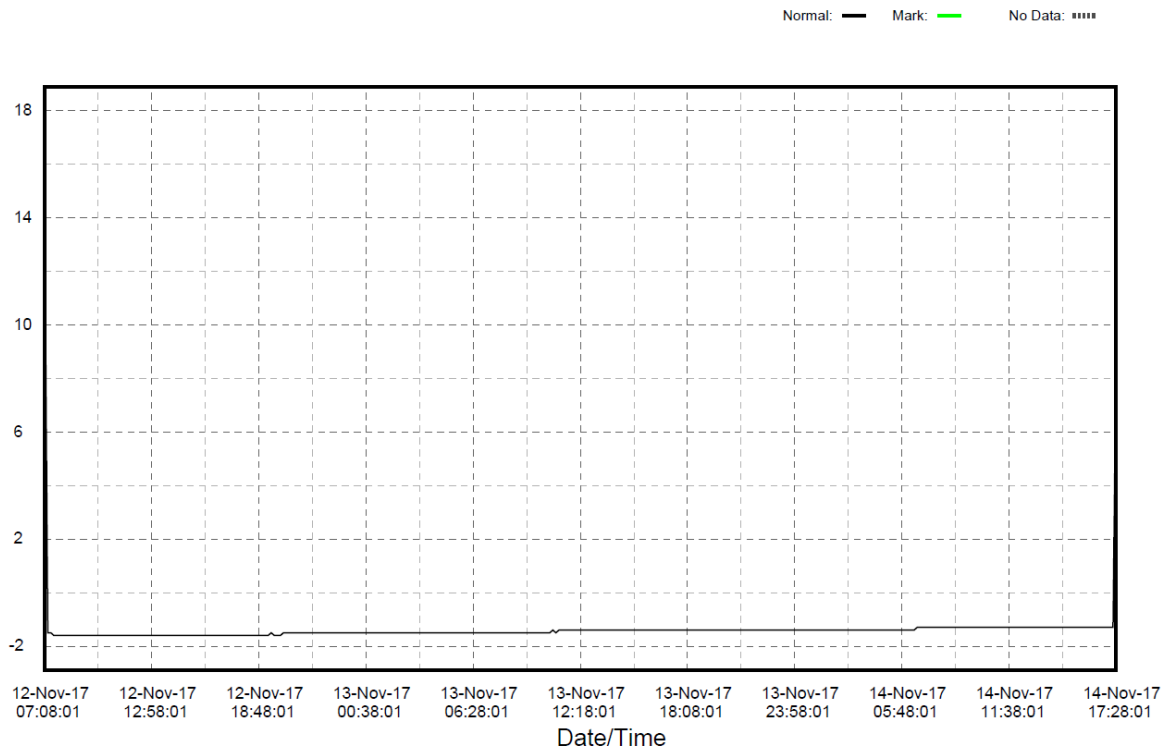

### A2.3 Arrival temperatures Europe establishments

In this Annex III raw data information of the arrival temperatures Europe establishments are given in table AIII.1.

| <b>Arrival Date</b> | <b>Core Temperature (°C)</b> | <b>Supplier</b>     |
|---------------------|------------------------------|---------------------|
| 11-1-2017           | -0,80                        | Fresh Perch Limited |
| 12-1-2017           | -1,10                        | Fresh Perch Limited |
| 18-1-2017           | -1,20                        | Fresh Perch Limited |
| 19-1-2017           | -1,50                        | Fresh Perch Limited |
| 25-1-2017           | -0,80                        | Fresh Perch Limited |
| 26-1-2017           | -1,20                        | Fresh Perch Limited |
| 30-1-2017           | -1,10                        | Fresh Perch Limited |
| 1-2-2017            | -0,40                        | Fresh Perch Limited |
| 2-2-2017            | -1,10                        | Fresh Perch Limited |
| 6-2-2017            | -0,70                        | Fresh Perch Limited |
| 8-2-2017            | -0,80                        | Fresh Perch Limited |
| 9-2-2017            | -1,20                        | Fresh Perch Limited |
| 13-2-2017           | -0,80                        | Fresh Perch Limited |
| 15-2-2017           | -0,30                        | Fresh Perch Limited |
| 16-2-2017           | -0,10                        | Fresh Perch Limited |
| 20-2-2017           | -1,00                        | Fresh Perch Limited |
| 20-2-2017           | -1,10                        | Fresh Perch Limited |
| 22-2-2017           | -0,30                        | Fresh Perch Limited |
| 23-2-2017           | -1,20                        | Fresh Perch Limited |
| 27-2-2017           | -0,50                        | Fresh Perch Limited |
| 1-3-2017            | -1,10                        | Fresh Perch Limited |
| 2-3-2017            | -0,80                        | Fresh Perch Limited |
| 6-3-2017            | -0,90                        | Fresh Perch Limited |
| 8-3-2017            | -1,10                        | Fresh Perch Limited |
| 9-3-2017            | -1,40                        | Fresh Perch Limited |
| 13-3-2017           | -1,10                        | Fresh Perch Limited |
| 14-3-2017           | 0,60                         | Fresh Perch Limited |
| 15-3-2017           | -1,20                        | Fresh Perch Limited |
| 16-3-2017           | -0,80                        | Fresh Perch Limited |
| 22-3-2017           | -0,70                        | Fresh Perch Limited |
| 27-3-2017           | -0,80                        | Fresh Perch Limited |
| 29-3-2017           | 0,80                         | Fresh Perch Limited |
| 30-3-2017           | -0,90                        | Fresh Perch Limited |
| 3-4-2017            | -0,70                        | Fresh Perch Limited |
| 5-4-2017            | -1,60                        | Fresh Perch Limited |
| 6-4-2017            | -0,80                        | Fresh Perch Limited |
| 10-4-2017           | -0,60                        | Fresh Perch Limited |
| 12-4-2017           | -0,60                        | Fresh Perch Limited |
| 13-4-2017           | -0,40                        | Fresh Perch Limited |
| 18-4-2017           | -0,60                        | Fresh Perch Limited |
| 19-4-2017           | -0,60                        | Fresh Perch Limited |
| 21-4-2017           | -0,90                        | Fresh Perch Limited |



|                   |       |                     |
|-------------------|-------|---------------------|
| <b>24-4-2017</b>  | -0,70 | Fresh Perch Limited |
| <b>27-4-2017</b>  | -0,40 | Fresh Perch Limited |
| <b>28-4-2017</b>  | -0,50 | Fresh Perch Limited |
| <b>2-5-2017</b>   | -0,40 | Fresh Perch Limited |
| <b>3-5-2017</b>   | -1,30 | Fresh Perch Limited |
| <b>4-5-2017</b>   | -1,10 | Fresh Perch Limited |
| <b>8-5-2017</b>   | -0,50 | Fresh Perch Limited |
| <b>10-5-2017</b>  | 0,40  | Fresh Perch Limited |
| <b>10-5-2017</b>  | -0,80 | Fresh Perch Limited |
| <b>11-5-2017</b>  | -1,00 | Fresh Perch Limited |
| <b>15-5-2017</b>  | -0,60 | Fresh Perch Limited |
| <b>15-5-2017</b>  | -0,60 | Fresh Perch Limited |
| <b>18-5-2017</b>  | -0,4  | Fresh Perch Limited |
| <b>22-5-2017</b>  | -0,8  | Fresh Perch Limited |
| <b>10-5-2017</b>  | 0,4   | Fresh Perch Limited |
| <b>25-5-2017</b>  | -0,6  | Fresh Perch Limited |
| <b>29-5-2017</b>  | 1,2   | Fresh Perch Limited |
| <b>31-5-2017</b>  | -1,3  | Fresh Perch Limited |
| <b>1-6-2017</b>   | -1,1  | Fresh Perch Limited |
| <b>5-6-2017</b>   | -0,8  | Fresh Perch Limited |
| <b>7-6-2017</b>   | -0,7  | Fresh Perch Limited |
| <b>8-6-2017</b>   | -0,6  | Fresh Perch Limited |
| <b>14-6-2017</b>  | -0,9  | Fresh Perch Limited |
| <b>19-6-2017</b>  | -0,5  | Fresh Perch Limited |
| <b>21-6-2017</b>  | -0,6  | Fresh Perch Limited |
| <b>22-6-2017</b>  | -0,4  | Fresh Perch Limited |
| <b>26-6-2017</b>  | -0,7  | Fresh Perch Limited |
| <b>28-6-2017</b>  | -0,8  | Fresh Perch Limited |
| <b>29-6-2017</b>  | -1    | Fresh Perch Limited |
| <b>24-8-2017</b>  | 0,2   | Fresh Perch Limited |
| <b>28-8-2017</b>  | -0,5  | Fresh Perch Limited |
| <b>31-8-2017</b>  | -0,8  | Fresh Perch Limited |
| <b>1-9-2017</b>   | -0,4  | Fresh Perch Limited |
| <b>7-9-2017</b>   | -0,7  | Fresh Perch Limited |
| <b>8-9-2017</b>   | -0,7  | Fresh Perch Limited |
| <b>14-9-2017</b>  | -0,9  | Fresh Perch Limited |
| <b>15-9-2017</b>  | -0,8  | Fresh Perch Limited |
| <b>21-9-2017</b>  | -1    | Fresh Perch Limited |
| <b>22-9-2017</b>  | -0,8  | Fresh Perch Limited |
| <b>5-10-2017</b>  | -0,8  | Fresh Perch Limited |
| <b>6-10-2017</b>  | -0,5  | Fresh Perch Limited |
| <b>6-10-2017</b>  | -0,5  | Fresh Perch Limited |
| <b>9-10-2017</b>  | -1    | Fresh Perch Limited |
| <b>12-10-2017</b> | -1,3  | Fresh Perch Limited |
| <b>16-10-2017</b> | -0,7  | Fresh Perch Limited |
| <b>17-10-2017</b> | -0,8  | Fresh Perch Limited |
| <b>19-10-2017</b> | -1    | Fresh Perch Limited |

|                   |       |                     |
|-------------------|-------|---------------------|
| <b>23-10-2017</b> | -1    | Fresh Perch Limited |
| <b>26-10-2017</b> | -0,9  | Fresh Perch Limited |
| <b>27-10-2017</b> | -0,7  | Fresh Perch Limited |
| <b>2-11-2017</b>  | -1    | Fresh Perch Limited |
| <b>6-11-2017</b>  | 0,9   | Fresh Perch Limited |
| <b>9-11-2017</b>  | -0,9  | Fresh Perch Limited |
| <b>13-11-2017</b> | -1    | Fresh Perch Limited |
| <b>14-11-2017</b> | -0,7  | Fresh Perch Limited |
| <b>16-11-2017</b> | -1,1  | Fresh Perch Limited |
| <b>20-11-2017</b> | -0,9  | Fresh Perch Limited |
| <b>21-11-2017</b> | -1    | Fresh Perch Limited |
| <b>23-11-2017</b> | -0,9  | Fresh Perch Limited |
| <b>27-11-2017</b> | -0,5  | Fresh Perch Limited |
| <b>29-11-2017</b> | -0,3  | Fresh Perch Limited |
| <b>30-11-2017</b> | -0,3  | Fresh Perch Limited |
| <b>4-12-2017</b>  | -0,3  | Fresh Perch Limited |
| <b>5-12-2017</b>  | -0,3  | Fresh Perch Limited |
| <b>7-12-2017</b>  | 0,6   | Fresh Perch Limited |
| <b>11-12-2017</b> | 0,2   | Fresh Perch Limited |
| <b>12-12-2017</b> | -0,3  | Fresh Perch Limited |
| <b>14-12-2017</b> | -0,1  | Fresh Perch Limited |
| <b>18-12-2017</b> | -0,3  | Fresh Perch Limited |
| <b>19-12-2017</b> | -0,7  | Fresh Perch Limited |
| <b>10-1-2018</b>  | -0,8  | Fresh Perch Limited |
| <b>15-1-2018</b>  | -0,7  | Fresh Perch Limited |
| <b>18-1-2018</b>  | -1,1  | Fresh Perch Limited |
| <b>19-1-2018</b>  | -0,7  | Fresh Perch Limited |
| <b>22-1-2018</b>  | -0,7  | Fresh Perch Limited |
| <b>23-1-2018</b>  | -1,1  | Fresh Perch Limited |
| <b>25-1-2018</b>  | -0,8  | Fresh Perch Limited |
| <b>29-1-2018</b>  | -0,8  | Fresh Perch Limited |
| <b>29-1-2018</b>  | -0,8  | Fresh Perch Limited |
| <b>30-1-2018</b>  | -1    | Fresh Perch Limited |
| <b>1-2-2018</b>   | -1,1  | Fresh Perch Limited |
| <b>5-2-2018</b>   | -0,8  | Fresh Perch Limited |
| <b>6-2-2018</b>   | -0,2  | Fresh Perch Limited |
| <b>8-2-2018</b>   | -0,8  | Fresh Perch Limited |
| <b>12-2-2018</b>  | -0,8  | Fresh Perch Limited |
| <b>13-2-2018</b>  | -1    | Fresh Perch Limited |
| <b>15-2-2018</b>  | -1,2  | Fresh Perch Limited |
| <b>19-2-2018</b>  | -1    | Fresh Perch Limited |
| <b>20-2-2018</b>  | -1    | Fresh Perch Limited |
| <b>26-2-2018</b>  | -1    | Fresh Perch Limited |
| <b>27-2-2018</b>  | -0,80 | Fresh Perch Limited |
| <b>5-3-2018</b>   | -1,20 | Fresh Perch Limited |
| <b>5-3-2018</b>   | -0,60 | Fresh Perch Limited |
| <b>18-1-2017</b>  | -1,40 | Lake Bounty Ltd     |

|                  |       |                 |
|------------------|-------|-----------------|
| <b>20-1-2017</b> | -1,50 | Lake Bounty Ltd |
| <b>23-1-2017</b> | -1,00 | Lake Bounty Ltd |
| <b>30-1-2017</b> | -1,00 | Lake Bounty Ltd |
| <b>30-1-2017</b> | -0,80 | Lake Bounty Ltd |
| <b>2-2-2017</b>  | -1,10 | Lake Bounty Ltd |
| <b>3-2-2017</b>  | -1,00 | Lake Bounty Ltd |
| <b>6-2-2017</b>  | -0,20 | Lake Bounty Ltd |
| <b>9-2-2017</b>  | -0,90 | Lake Bounty Ltd |
| <b>10-2-2017</b> | -0,10 | Lake Bounty Ltd |
| <b>16-2-2017</b> | -0,70 | Lake Bounty Ltd |
| <b>17-2-2017</b> | -1,10 | Lake Bounty Ltd |
| <b>17-2-2017</b> | -1,10 | Lake Bounty Ltd |
| <b>20-2-2017</b> | -1,00 | Lake Bounty Ltd |
| <b>27-2-2017</b> | -0,80 | Lake Bounty Ltd |
| <b>27-2-2017</b> | -0,70 | Lake Bounty Ltd |
| <b>3-3-2017</b>  | -0,70 | Lake Bounty Ltd |
| <b>6-3-2017</b>  | -1,10 | Lake Bounty Ltd |
| <b>10-3-2017</b> | -0,20 | Lake Bounty Ltd |
| <b>13-3-2017</b> | -0,80 | Lake Bounty Ltd |
| <b>15-3-2017</b> | -1,30 | Lake Bounty Ltd |
| <b>16-3-2017</b> | -1,50 | Lake Bounty Ltd |
| <b>17-3-2017</b> | -1,10 | Lake Bounty Ltd |
| <b>27-3-2017</b> | -1,00 | Lake Bounty Ltd |
| <b>31-3-2017</b> | -1,30 | Lake Bounty Ltd |
| <b>3-4-2017</b>  | 1,20  | Lake Bounty Ltd |
| <b>7-4-2017</b>  | -0,70 | Lake Bounty Ltd |
| <b>14-4-2017</b> | -0,80 | Lake Bounty Ltd |
| <b>21-4-2017</b> | -0,70 | Lake Bounty Ltd |
| <b>21-4-2017</b> | -0,80 | Lake Bounty Ltd |
| <b>28-4-2017</b> | -0,60 | Lake Bounty Ltd |
| <b>5-5-2017</b>  | -0,70 | Lake Bounty Ltd |
| <b>5-5-2017</b>  | -1,20 | Lake Bounty Ltd |
| <b>8-5-2017</b>  | -1,10 | Lake Bounty Ltd |
| <b>12-5-2017</b> | -0,60 | Lake Bounty Ltd |
| <b>15-5-2017</b> | 2,40  | Lake Bounty Ltd |
| <b>18-5-2017</b> | -0,7  | Lake Bounty Ltd |
| <b>19-5-2017</b> | -0,5  | Lake Bounty Ltd |
| <b>22-5-2017</b> | -0,5  | Lake Bounty Ltd |
| <b>10-5-2017</b> | -0,6  | Lake Bounty Ltd |
| <b>25-5-2017</b> | -0,8  | Lake Bounty Ltd |
| <b>30-5-2017</b> | -0,7  | Lake Bounty Ltd |
| <b>5-6-2017</b>  | -0,2  | Lake Bounty Ltd |
| <b>5-6-2017</b>  | -0,5  | Lake Bounty Ltd |
| <b>8-6-2017</b>  | -0,7  | Lake Bounty Ltd |
| <b>12-6-2017</b> | -0,6  | Lake Bounty Ltd |
| <b>16-6-2017</b> | 0,5   | Lake Bounty Ltd |
| <b>19-6-2017</b> | -0,3  | Lake Bounty Ltd |

|                   |       |                              |
|-------------------|-------|------------------------------|
| <b>26-6-2017</b>  | -0,8  | Lake Bounty Ltd              |
| <b>3-7-2017</b>   | -0,6  | Lake Bounty Ltd              |
| <b>3-7-2017</b>   | -0,6  | Lake Bounty Ltd              |
| <b>9-7-2017</b>   | 0,4   | Lake Bounty Ltd              |
| <b>9-7-2017</b>   | -0,6  | Lake Bounty Ltd              |
| <b>12-7-2017</b>  | -0,5  | Lake Bounty Ltd              |
| <b>17-7-2017</b>  | -0,3  | Lake Bounty Ltd              |
| <b>21-7-2017</b>  | -0,6  | Lake Bounty Ltd              |
| <b>28-7-2017</b>  | 0,3   | Lake Bounty Ltd              |
| <b>7-8-2017</b>   | -0,5  | Lake Bounty Ltd              |
| <b>11-8-2017</b>  | -0,7  | Lake Bounty Ltd              |
| <b>18-8-2017</b>  | -0,8  | Lake Bounty Ltd              |
| <b>24-8-2017</b>  | -1,2  | Lake Bounty Ltd              |
| <b>1-9-2017</b>   | -0,6  | Lake Bounty Ltd              |
| <b>8-9-2017</b>   | -0,8  | Lake Bounty Ltd              |
| <b>15-9-2017</b>  | -0,7  | Lake Bounty Ltd              |
| <b>22-9-2017</b>  | -0,7  | Lake Bounty Ltd              |
| <b>29-9-2017</b>  | 1     | Lake Bounty Ltd              |
| <b>6-10-2017</b>  | -0,7  | Lake Bounty Ltd              |
| <b>13-10-2017</b> | -0,9  | Lake Bounty Ltd              |
| <b>13-10-2017</b> | -0,9  | Lake Bounty Ltd              |
| <b>16-10-2017</b> | -1    | Lake Bounty Ltd              |
| <b>19-10-2017</b> | -1    | Lake Bounty Ltd              |
| <b>19-10-2017</b> | -0,8  | Lake Bounty Ltd              |
| <b>27-10-2017</b> | -0,9  | Lake Bounty Ltd              |
| <b>3-11-2017</b>  | -1,1  | Lake Bounty Ltd              |
| <b>10-11-2017</b> | -0,8  | Lake Bounty Ltd              |
| <b>17-11-2017</b> | -0,8  | Lake Bounty Ltd              |
| <b>24-11-2017</b> | -0,8  | Lake Bounty Ltd              |
| <b>1-12-2017</b>  | -0,4  | Lake Bounty Ltd              |
| <b>8-12-2017</b>  | -0,5  | Lake Bounty Ltd              |
| <b>14-12-2017</b> | -0,5  | Lake Bounty Ltd              |
| <b>19-1-2018</b>  | -1    | Lake Bounty Ltd              |
| <b>26-1-2018</b>  | -1,2  | Lake Bounty Ltd              |
| <b>2-2-2018</b>   | -0,9  | Lake Bounty Ltd              |
| <b>6-2-2018</b>   | -1    | Lake Bounty Ltd              |
| <b>9-2-2018</b>   | -1    | Lake Bounty Ltd              |
| <b>16-2-2018</b>  | -1    | Lake Bounty Ltd              |
| <b>19-2-2018</b>  | -1,1  | Lake Bounty Ltd              |
| <b>20-2-2018</b>  | -1,1  | Lake Bounty Ltd              |
| <b>21-2-2018</b>  | -0,9  | Lake Bounty Ltd              |
| <b>27-2-2018</b>  | -1,10 | Lake Bounty Ltd              |
| <b>5-3-2018</b>   | -0,80 | Lake Bounty Ltd              |
| <b>12-1-2017</b>  | -0,80 | Lake Eco Fish Processing Ltd |
| <b>19-1-2017</b>  | -0,90 | Lake Eco Fish Processing Ltd |
| <b>26-1-2017</b>  | -0,70 | Lake Eco Fish Processing Ltd |
| <b>2-2-2017</b>   | -0,80 | Lake Eco Fish Processing Ltd |

|                   |       |                              |
|-------------------|-------|------------------------------|
| <b>8-2-2017</b>   | -0,60 | Lake Eco Fish Processing Ltd |
| <b>9-2-2017</b>   | -0,10 | Lake Eco Fish Processing Ltd |
| <b>16-2-2017</b>  | -0,90 | Lake Eco Fish Processing Ltd |
| <b>23-2-2017</b>  | -1,00 | Lake Eco Fish Processing Ltd |
| <b>2-3-2017</b>   | -0,70 | Lake Eco Fish Processing Ltd |
| <b>8-3-2017</b>   | -0,40 | Lake Eco Fish Processing Ltd |
| <b>9-3-2017</b>   | -0,50 | Lake Eco Fish Processing Ltd |
| <b>16-3-2017</b>  | -0,80 | Lake Eco Fish Processing Ltd |
| <b>30-3-2017</b>  | -1,00 | Lake Eco Fish Processing Ltd |
| <b>6-4-2017</b>   | -0,30 | Lake Eco Fish Processing Ltd |
| <b>13-4-2017</b>  | -0,60 | Lake Eco Fish Processing Ltd |
| <b>21-4-2017</b>  | -0,90 | Lake Eco Fish Processing Ltd |
| <b>27-4-2017</b>  | -0,70 | Lake Eco Fish Processing Ltd |
| <b>5-5-2017</b>   | 0,00  | Lake Eco Fish Processing Ltd |
| <b>18-5-2017</b>  | -0,6  | Lake Eco Fish Processing Ltd |
| <b>25-5-2017</b>  | -0,5  | Lake Eco Fish Processing Ltd |
| <b>1-6-2017</b>   | -1,4  | Lake Eco Fish Processing Ltd |
| <b>15-6-2017</b>  | -0,5  | Lake Eco Fish Processing Ltd |
| <b>22-6-2017</b>  | -1    | Lake Eco Fish Processing Ltd |
| <b>29-6-2017</b>  | 0,7   | Lake Eco Fish Processing Ltd |
| <b>28-8-2017</b>  | -0,5  | Lake Eco Fish Processing Ltd |
| <b>31-8-2017</b>  | -0,9  | Lake Eco Fish Processing Ltd |
| <b>7-9-2017</b>   | -0,5  | Lake Eco Fish Processing Ltd |
| <b>14-9-2017</b>  | -0,7  | Lake Eco Fish Processing Ltd |
| <b>21-9-2017</b>  | -1    | Lake Eco Fish Processing Ltd |
| <b>28-9-2017</b>  | -0,7  | Lake Eco Fish Processing Ltd |
| <b>12-10-2017</b> | -1    | Lake Eco Fish Processing Ltd |
| <b>12-10-2017</b> | -0,8  | Lake Eco Fish Processing Ltd |
| <b>12-10-2017</b> | -1,2  | Lake Eco Fish Processing Ltd |
| <b>26-10-2017</b> | -1,2  | Lake Eco Fish Processing Ltd |
| <b>2-11-2017</b>  | -1    | Lake Eco Fish Processing Ltd |
| <b>9-11-2017</b>  | -0,7  | Lake Eco Fish Processing Ltd |
| <b>16-11-2017</b> | -0,9  | Lake Eco Fish Processing Ltd |
| <b>23-11-2017</b> | -0,9  | Lake Eco Fish Processing Ltd |
| <b>30-11-2017</b> | -0,5  | Lake Eco Fish Processing Ltd |
| <b>5-12-2017</b>  | -0,7  | Lake Eco Fish Processing Ltd |
| <b>15-12-2017</b> | -0,5  | Lake Eco Fish Processing Ltd |
| <b>11-1-2018</b>  | -0,7  | Lake Eco Fish Processing Ltd |
| <b>18-1-2018</b>  | -0,9  | Lake Eco Fish Processing Ltd |
| <b>25-1-2018</b>  | -1,1  | Lake Eco Fish Processing Ltd |
| <b>1-2-2018</b>   | -1    | Lake Eco Fish Processing Ltd |
| <b>6-2-2018</b>   | -0,8  | Lake Eco Fish Processing Ltd |
| <b>8-2-2018</b>   | -1    | Lake Eco Fish Processing Ltd |
| <b>15-2-2018</b>  | -0,8  | Lake Eco Fish Processing Ltd |
| <b>20-2-2018</b>  | -0,7  | Lake Eco Fish Processing Ltd |
| <b>22-2-2018</b>  | -0,7  | Lake Eco Fish Processing Ltd |
| <b>26-2-2018</b>  | -0,9  | Lake Eco Fish Processing Ltd |

|                  |       |                              |
|------------------|-------|------------------------------|
| <b>1-3-2018</b>  | -1,10 | Lake Eco Fish Processing Ltd |
| <b>10-1-2017</b> | -0,70 | Nile Perch Fisheries Limited |
| <b>11-1-2017</b> | -1,10 | Nile Perch Fisheries Limited |
| <b>16-1-2017</b> | -0,70 | Nile Perch Fisheries Limited |
| <b>16-1-2017</b> | -0,80 | Nile Perch Fisheries Limited |
| <b>18-1-2017</b> | -1,00 | Nile Perch Fisheries Limited |
| <b>23-1-2017</b> | -0,70 | Nile Perch Fisheries Limited |
| <b>25-1-2017</b> | -1,10 | Nile Perch Fisheries Limited |
| <b>30-1-2017</b> | -0,50 | Nile Perch Fisheries Limited |
| <b>31-1-2017</b> | -0,60 | Nile Perch Fisheries Limited |
| <b>1-2-2017</b>  | -0,70 | Nile Perch Fisheries Limited |
| <b>6-2-2017</b>  | -0,90 | Nile Perch Fisheries Limited |
| <b>6-2-2017</b>  | -0,70 | Nile Perch Fisheries Limited |
| <b>9-2-2017</b>  | -1,30 | Nile Perch Fisheries Limited |
| <b>13-2-2017</b> | -0,20 | Nile Perch Fisheries Limited |
| <b>15-2-2017</b> | -0,80 | Nile Perch Fisheries Limited |
| <b>20-2-2017</b> | -1,00 | Nile Perch Fisheries Limited |
| <b>22-2-2017</b> | -0,80 | Nile Perch Fisheries Limited |
| <b>27-2-2017</b> | -0,80 | Nile Perch Fisheries Limited |
| <b>27-2-2017</b> | -0,80 | Nile Perch Fisheries Limited |
| <b>2-3-2017</b>  | -1,10 | Nile Perch Fisheries Limited |
| <b>6-3-2017</b>  | -1,10 | Nile Perch Fisheries Limited |
| <b>8-3-2017</b>  | -0,50 | Nile Perch Fisheries Limited |
| <b>13-3-2017</b> | -0,70 | Nile Perch Fisheries Limited |
| <b>15-3-2017</b> | -0,70 | Nile Perch Fisheries Limited |
| <b>22-3-2017</b> | -1,10 | Nile Perch Fisheries Limited |
| <b>27-3-2017</b> | -1,00 | Nile Perch Fisheries Limited |
| <b>29-3-2017</b> | -0,20 | Nile Perch Fisheries Limited |
| <b>3-4-2017</b>  | -0,50 | Nile Perch Fisheries Limited |
| <b>3-4-2017</b>  | -0,80 | Nile Perch Fisheries Limited |
| <b>5-4-2017</b>  | -0,70 | Nile Perch Fisheries Limited |
| <b>10-4-2017</b> | -0,70 | Nile Perch Fisheries Limited |
| <b>10-4-2017</b> | -0,70 | Nile Perch Fisheries Limited |
| <b>13-4-2017</b> | -0,70 | Nile Perch Fisheries Limited |
| <b>18-4-2017</b> | -1,00 | Nile Perch Fisheries Limited |
| <b>18-4-2017</b> | -0,40 | Nile Perch Fisheries Limited |
| <b>19-4-2017</b> | -1,00 | Nile Perch Fisheries Limited |
| <b>24-4-2017</b> | -0,40 | Nile Perch Fisheries Limited |
| <b>24-4-2017</b> | -0,40 | Nile Perch Fisheries Limited |
| <b>26-4-2017</b> | -0,50 | Nile Perch Fisheries Limited |
| <b>2-5-2017</b>  | -0,60 | Nile Perch Fisheries Limited |
| <b>2-5-2017</b>  | -1,00 | Nile Perch Fisheries Limited |
| <b>3-5-2017</b>  | -0,70 | Nile Perch Fisheries Limited |
| <b>9-5-2017</b>  | -0,50 | Nile Perch Fisheries Limited |
| <b>15-5-2017</b> | -0,60 | Nile Perch Fisheries Limited |
| <b>18-5-2017</b> | -1,2  | Nile Perch Fisheries Limited |
| <b>22-5-2017</b> | -0,6  | Nile Perch Fisheries Limited |

|                   |      |                              |
|-------------------|------|------------------------------|
| <b>24-5-2017</b>  | -1   | Nile Perch Fisheries Limited |
| <b>29-5-2017</b>  | -0,8 | Nile Perch Fisheries Limited |
| <b>31-5-2017</b>  | -1,1 | Nile Perch Fisheries Limited |
| <b>5-6-2017</b>   | -1,6 | Nile Perch Fisheries Limited |
| <b>7-6-2017</b>   | -0,6 | Nile Perch Fisheries Limited |
| <b>12-6-2017</b>  | -0,8 | Nile Perch Fisheries Limited |
| <b>14-6-2017</b>  | -0,7 | Nile Perch Fisheries Limited |
| <b>20-6-2017</b>  | -0,9 | Nile Perch Fisheries Limited |
| <b>21-6-2017</b>  | -0,6 | Nile Perch Fisheries Limited |
| <b>26-6-2017</b>  | -0,7 | Nile Perch Fisheries Limited |
| <b>28-6-2017</b>  | -0,6 | Nile Perch Fisheries Limited |
| <b>3-7-2017</b>   | -0,8 | Nile Perch Fisheries Limited |
| <b>6-7-2017</b>   | -0,8 | Nile Perch Fisheries Limited |
| <b>10-7-2017</b>  | -0,5 | Nile Perch Fisheries Limited |
| <b>12-7-2017</b>  | -0,5 | Nile Perch Fisheries Limited |
| <b>17-7-2017</b>  | -0,2 | Nile Perch Fisheries Limited |
| <b>19-7-2017</b>  | 1,4  | Nile Perch Fisheries Limited |
| <b>24-7-2017</b>  | -0,5 | Nile Perch Fisheries Limited |
| <b>27-7-2017</b>  | -0,2 | Nile Perch Fisheries Limited |
| <b>31-7-2017</b>  | -0,5 | Nile Perch Fisheries Limited |
| <b>2-8-2017</b>   | -0,6 | Nile Perch Fisheries Limited |
| <b>7-8-2017</b>   | 0,5  | Nile Perch Fisheries Limited |
| <b>9-8-2017</b>   | -0,8 | Nile Perch Fisheries Limited |
| <b>14-8-2017</b>  | -0,5 | Nile Perch Fisheries Limited |
| <b>16-8-2017</b>  | -0,7 | Nile Perch Fisheries Limited |
| <b>17-8-2017</b>  | -0,9 | Nile Perch Fisheries Limited |
| <b>21-8-2017</b>  | -0,7 | Nile Perch Fisheries Limited |
| <b>23-8-2017</b>  | -1   | Nile Perch Fisheries Limited |
| <b>29-8-2017</b>  | 0,6  | Nile Perch Fisheries Limited |
| <b>30-8-2017</b>  | -0,6 | Nile Perch Fisheries Limited |
| <b>4-9-2017</b>   | 0,5  | Nile Perch Fisheries Limited |
| <b>13-9-2017</b>  | -0,8 | Nile Perch Fisheries Limited |
| <b>18-9-2017</b>  | -1   | Nile Perch Fisheries Limited |
| <b>20-9-2017</b>  | -0,9 | Nile Perch Fisheries Limited |
| <b>25-9-2017</b>  | 0    | Nile Perch Fisheries Limited |
| <b>27-9-2017</b>  | -0,8 | Nile Perch Fisheries Limited |
| <b>3-10-2017</b>  | -0,3 | Nile Perch Fisheries Limited |
| <b>9-10-2017</b>  | -1,1 | Nile Perch Fisheries Limited |
| <b>12-10-2017</b> | -1   | Nile Perch Fisheries Limited |
| <b>16-10-2017</b> | -0,7 | Nile Perch Fisheries Limited |
| <b>18-10-2017</b> | -1   | Nile Perch Fisheries Limited |
| <b>23-10-2017</b> | -1   | Nile Perch Fisheries Limited |
| <b>25-10-2017</b> | -0,8 | Nile Perch Fisheries Limited |
| <b>31-10-2017</b> | -0,8 | Nile Perch Fisheries Limited |
| <b>31-10-2017</b> | -1,2 | Nile Perch Fisheries Limited |
| <b>6-11-2017</b>  | -0,8 | Nile Perch Fisheries Limited |
| <b>8-11-2017</b>  | -1,3 | Nile Perch Fisheries Limited |

|                   |       |                              |
|-------------------|-------|------------------------------|
| <b>13-11-2017</b> | -0,7  | Nile Perch Fisheries Limited |
| <b>13-11-2017</b> | -1,1  | Nile Perch Fisheries Limited |
| <b>15-11-2017</b> | -0,8  | Nile Perch Fisheries Limited |
| <b>20-11-2017</b> | -0,9  | Nile Perch Fisheries Limited |
| <b>20-11-2017</b> | -0,8  | Nile Perch Fisheries Limited |
| <b>20-11-2017</b> | -1    | Nile Perch Fisheries Limited |
| <b>21-11-2017</b> | -0,6  | Nile Perch Fisheries Limited |
| <b>22-11-2017</b> | -1,1  | Nile Perch Fisheries Limited |
| <b>27-11-2017</b> | -0,5  | Nile Perch Fisheries Limited |
| <b>27-11-2017</b> | -0,5  | Nile Perch Fisheries Limited |
| <b>29-11-2017</b> | -0,3  | Nile Perch Fisheries Limited |
| <b>4-12-2017</b>  | -0,3  | Nile Perch Fisheries Limited |
| <b>4-12-2017</b>  | -0,5  | Nile Perch Fisheries Limited |
| <b>6-12-2017</b>  | -0,5  | Nile Perch Fisheries Limited |
| <b>11-12-2017</b> | 0,6   | Nile Perch Fisheries Limited |
| <b>11-12-2017</b> | 0,3   | Nile Perch Fisheries Limited |
| <b>13-12-2017</b> | -0,5  | Nile Perch Fisheries Limited |
| <b>18-12-2017</b> | -0,3  | Nile Perch Fisheries Limited |
| <b>18-12-2017</b> | -0,5  | Nile Perch Fisheries Limited |
| <b>20-12-2017</b> | -0,3  | Nile Perch Fisheries Limited |
| <b>3-1-2018</b>   | -0,8  | Nile Perch Fisheries Limited |
| <b>10-1-2018</b>  | -1,1  | Nile Perch Fisheries Limited |
| <b>15-1-2018</b>  | -0,8  | Nile Perch Fisheries Limited |
| <b>17-1-2018</b>  | -0,1  | Nile Perch Fisheries Limited |
| <b>22-1-2018</b>  | -0,8  | Nile Perch Fisheries Limited |
| <b>23-1-2018</b>  | -1,1  | Nile Perch Fisheries Limited |
| <b>24-1-2018</b>  | -1,1  | Nile Perch Fisheries Limited |
| <b>29-1-2018</b>  | -0,8  | Nile Perch Fisheries Limited |
| <b>30-1-2018</b>  | -1,1  | Nile Perch Fisheries Limited |
| <b>31-1-2018</b>  | -1,1  | Nile Perch Fisheries Limited |
| <b>5-2-2018</b>   | -0,8  | Nile Perch Fisheries Limited |
| <b>6-2-2018</b>   | -0,8  | Nile Perch Fisheries Limited |
| <b>7-2-2018</b>   | -0,1  | Nile Perch Fisheries Limited |
| <b>12-2-2018</b>  | -0,8  | Nile Perch Fisheries Limited |
| <b>13-2-2018</b>  | -1    | Nile Perch Fisheries Limited |
| <b>14-2-2018</b>  | -0,9  | Nile Perch Fisheries Limited |
| <b>19-2-2018</b>  | -0,6  | Nile Perch Fisheries Limited |
| <b>20-2-2018</b>  | -0,9  | Nile Perch Fisheries Limited |
| <b>21-2-2018</b>  | -0,9  | Nile Perch Fisheries Limited |
| <b>26-2-2018</b>  | -0,8  | Nile Perch Fisheries Limited |
| <b>27-2-2018</b>  | -0,90 | Nile Perch Fisheries Limited |
| <b>28-2-2018</b>  | -0,90 | Nile Perch Fisheries Limited |
| <b>6-3-2018</b>   | -1,00 | Nile Perch Fisheries Limited |
| <b>5-3-2018</b>   | -0,80 | Nile Perch Fisheries Limited |
| <b>15-2-2017</b>  | -0,80 | Omega Fish Ltd.              |
| <b>22-2-2017</b>  | -1,70 | Omega Fish Ltd.              |
| <b>10-1-2017</b>  | -1,00 | Victoria Perch Ltd           |



|                   |       |                    |
|-------------------|-------|--------------------|
| <b>16-1-2017</b>  | -1,10 | Victoria Perch Ltd |
| <b>23-1-2017</b>  | -1,00 | Victoria Perch Ltd |
| <b>30-1-2017</b>  | -1,00 | Victoria Perch Ltd |
| <b>13-2-2017</b>  | -0,20 | Victoria Perch Ltd |
| <b>13-2-2017</b>  | -0,30 | Victoria Perch Ltd |
| <b>14-2-2017</b>  | -0,40 | Victoria Perch Ltd |
| <b>27-2-2017</b>  | -0,70 | Victoria Perch Ltd |
| <b>6-3-2017</b>   | -0,80 | Victoria Perch Ltd |
| <b>6-3-2017</b>   | -0,90 | Victoria Perch Ltd |
| <b>13-3-2017</b>  | -0,90 | Victoria Perch Ltd |
| <b>15-3-2017</b>  | -0,80 | Victoria Perch Ltd |
| <b>22-3-2017</b>  | -0,90 | Victoria Perch Ltd |
| <b>27-3-2017</b>  | -0,60 | Victoria Perch Ltd |
| <b>3-4-2017</b>   | -0,70 | Victoria Perch Ltd |
| <b>2-5-2017</b>   | -0,90 | Victoria Perch Ltd |
| <b>12-7-2017</b>  | -0,8  | Victoria Perch Ltd |
| <b>27-7-2017</b>  | -0,3  | Victoria Perch Ltd |
| <b>2-8-2017</b>   | -0,8  | Victoria Perch Ltd |
| <b>29-8-2017</b>  | -0,9  | Victoria Perch Ltd |
| <b>30-8-2017</b>  | -0,7  | Victoria Perch Ltd |
| <b>4-9-2017</b>   | 0,4   | Victoria Perch Ltd |
| <b>13-9-2017</b>  | -1,3  | Victoria Perch Ltd |
| <b>20-9-2017</b>  | -0,6  | Victoria Perch Ltd |
| <b>27-9-2017</b>  | -1    | Victoria Perch Ltd |
| <b>12-10-2017</b> | -1    | Victoria Perch Ltd |
| <b>18-10-2017</b> | -0,8  | Victoria Perch Ltd |
| <b>30-10-2017</b> | -0,8  | Victoria Perch Ltd |
| <b>2-11-2017</b>  | -1,6  | Victoria Perch Ltd |
| <b>6-11-2017</b>  | 0,9   | Victoria Perch Ltd |
| <b>8-11-2017</b>  | -1,2  | Victoria Perch Ltd |
| <b>13-11-2017</b> | 0,7   | Victoria Perch Ltd |
| <b>15-11-2017</b> | -1,1  | Victoria Perch Ltd |
| <b>20-11-2017</b> | -0,8  | Victoria Perch Ltd |
| <b>22-11-2017</b> | -0,9  | Victoria Perch Ltd |
| <b>29-11-2017</b> | -0,9  | Victoria Perch Ltd |
| <b>4-12-2017</b>  | -0,4  | Victoria Perch Ltd |
| <b>6-12-2017</b>  | -0,7  | Victoria Perch Ltd |
| <b>13-12-2017</b> | -0,6  | Victoria Perch Ltd |
| <b>18-12-2017</b> | -0,3  | Victoria Perch Ltd |
| <b>20-12-2017</b> | -0,5  | Victoria Perch Ltd |
| <b>3-1-2018</b>   | -0,7  | Victoria Perch Ltd |
| <b>8-1-2018</b>   | -1,1  | Victoria Perch Ltd |
| <b>9-1-2018</b>   | -0,8  | Victoria Perch Ltd |
| <b>10-1-2018</b>  | -0,8  | Victoria Perch Ltd |
| <b>17-1-2018</b>  | -0,8  | Victoria Perch Ltd |
| <b>22-1-2018</b>  | 0,4   | Victoria Perch Ltd |
| <b>24-1-2018</b>  | -1    | Victoria Perch Ltd |

|                  |       |                    |
|------------------|-------|--------------------|
| <b>29-1-2018</b> | -0,8  | Victoria Perch Ltd |
| <b>31-1-2018</b> | -0,8  | Victoria Perch Ltd |
| <b>5-2-2018</b>  | -0,7  | Victoria Perch Ltd |
| <b>7-2-2018</b>  | -0,8  | Victoria Perch Ltd |
| <b>12-2-2018</b> | -0,7  | Victoria Perch Ltd |
| <b>14-2-2018</b> | -0,3  | Victoria Perch Ltd |
| <b>19-2-2018</b> | -0,7  | Victoria Perch Ltd |
| <b>21-2-2018</b> | -0,6  | Victoria Perch Ltd |
| <b>26-2-2018</b> | -0,3  | Victoria Perch Ltd |
| <b>28-2-2018</b> | -1,00 | Victoria Perch Ltd |
| <b>5-3-2018</b>  | -0,70 | Victoria Perch Ltd |

*Table: Core fillet temperature at arrival Europe establishment, arrival date and supplier name for Nile Perch fillets. In total 474 samples gathered in the period December 2017 – March 2018. Source: Fiorital*
