# Supplementary material for: The use of the so‐called ‘superchilling’ technique for the transport of fresh fishery products
Source: PubMed Central journal article supplement (PMC7842081; doi:10.2903/j.efsa.2021.6378), 2021-01-28
Supplement: EFS2-19-e06378-s002.pdf [file EFS2-19-e06378-s002.pdf]

## Part I

**FRESH PERCH LTD.**  
**P. O. BOX - 671, ENTEBBE, UGANDA**

DOC NO: FPL-CPQAR-05-FSMS

**NILE PERCH FILLETS CHILLED PRODUCT TEMPERATURE MONITORING RECORD**

**Date of Sampling:** 06<sup>th</sup> July 2020

**Sample Details:** 3.00 kg Chilled Nile Perch Fillets of grade 300-500 g contain 6 numbers of individual fillets in box.

**Sampling Scope:** To monitor the temperature of individual chilled fillet during time of packing and after five hour of storage in desired temperature.

**Sampling Description:**

| SAMPLE NO.             | TIME OF PACKING: 5.30 PM & TEMP. °C | TIME OF CHECKING: 10.30 PM & TEMP. °C |
|------------------------|-------------------------------------|---------------------------------------|
| E1                     | -1.8                                | -1.3                                  |
| E2                     | -1.5                                | -1.3                                  |
| E3                     | -1.4                                | -1.3                                  |
| E4                     | -1.6                                | -1.3                                  |
| E5                     | -1.5                                | -1.3                                  |
| E6                     | -1.2                                | -1.3                                  |
| <b>AVG. E TEMP. °C</b> | -1.5                                | -1.3                                  |

**Sampling Evidences:**

**A) TEMPERATURE RECORDED DURING TIME OF PACKING: TIME OF PACKING:  
5.30 PM AND TEMPERATURE (°C) OF EACH SAMPLE:**

**Sample No. E1:**

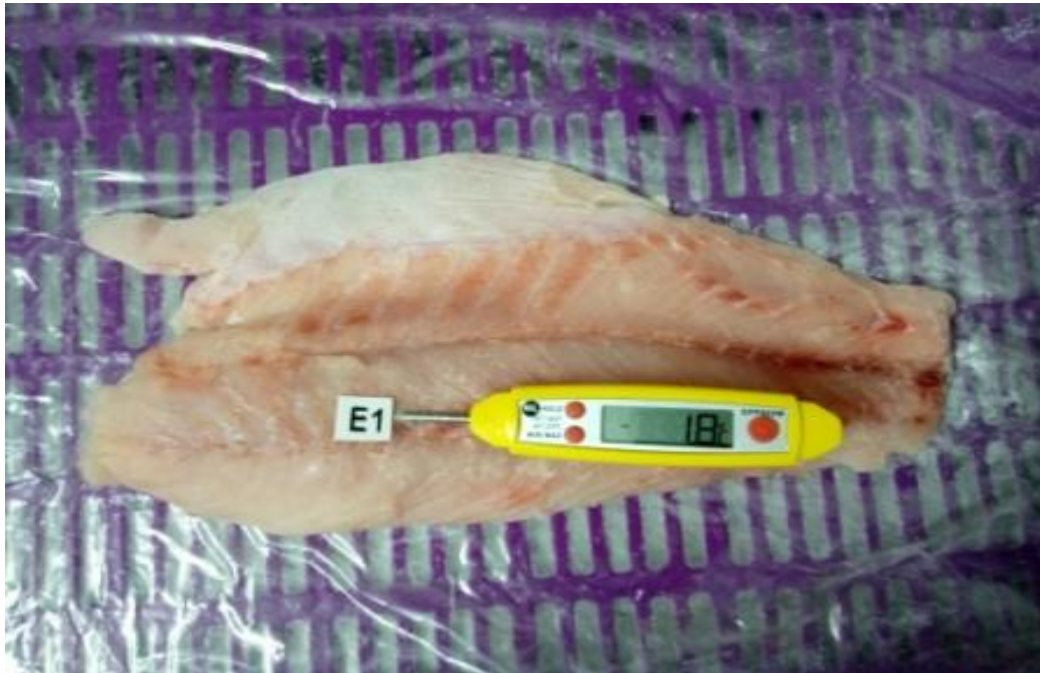

**Sample No. E2:**

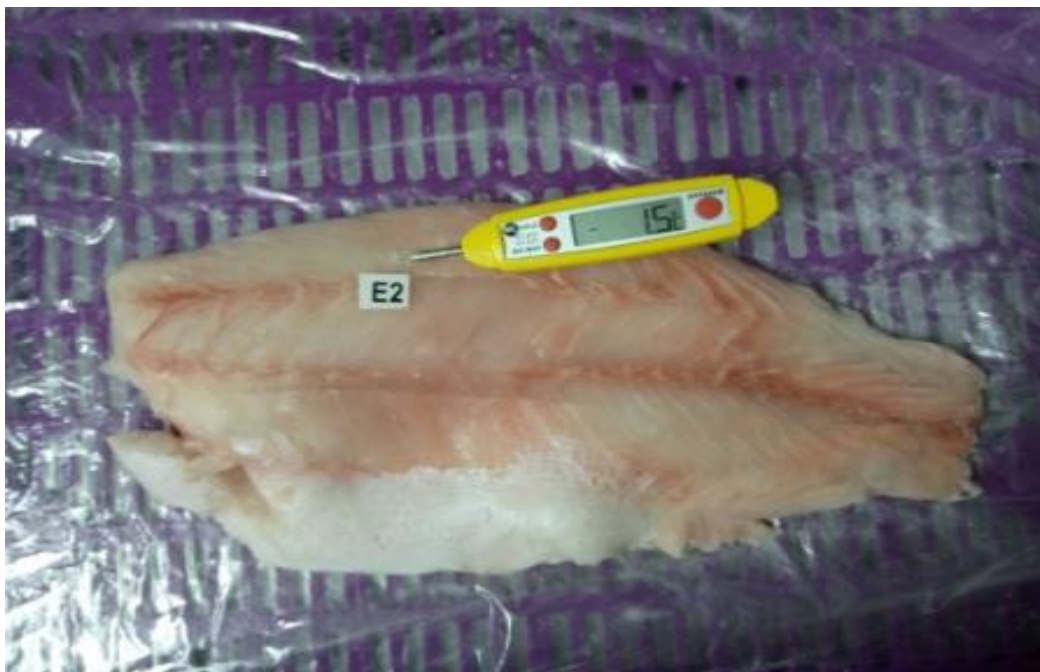

Sample No. E3:

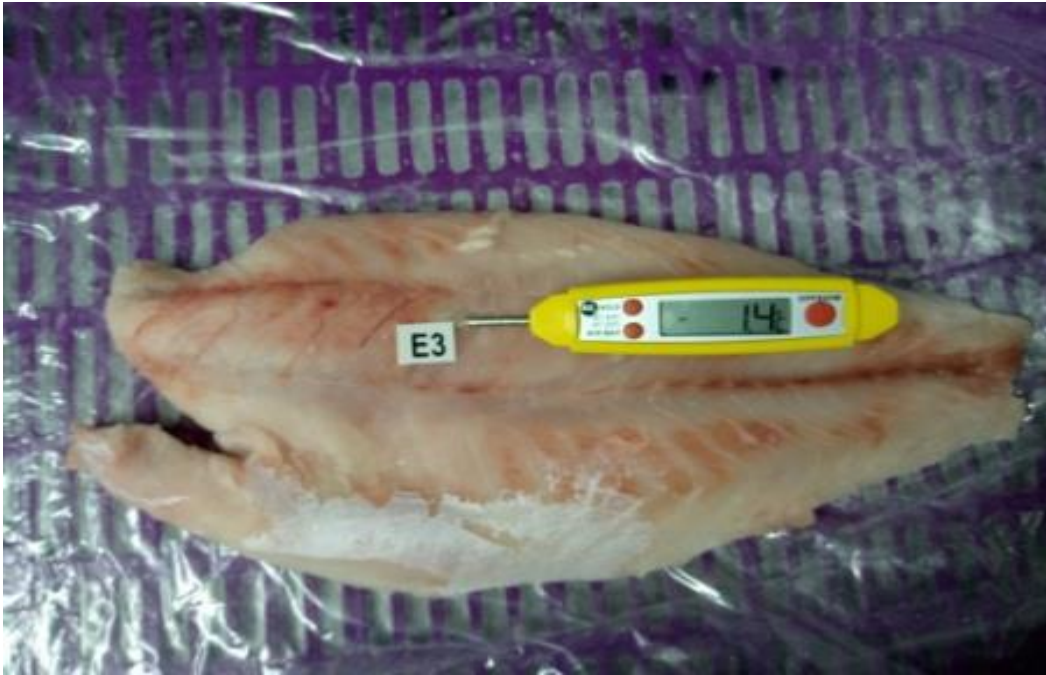

Sample No. E4:

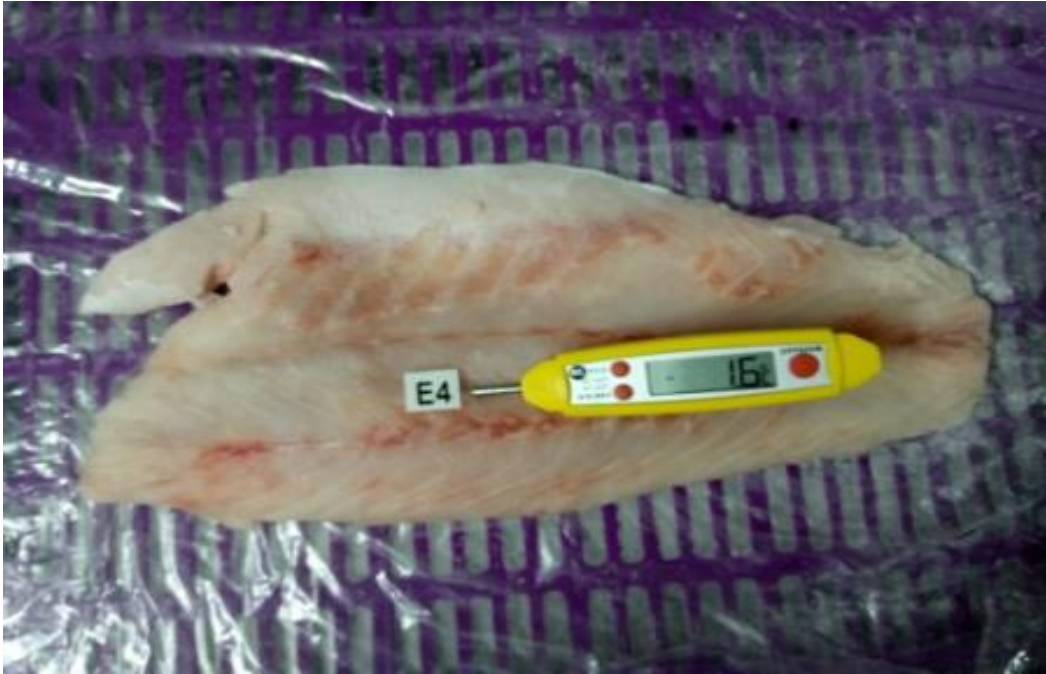

Sample No. E5:

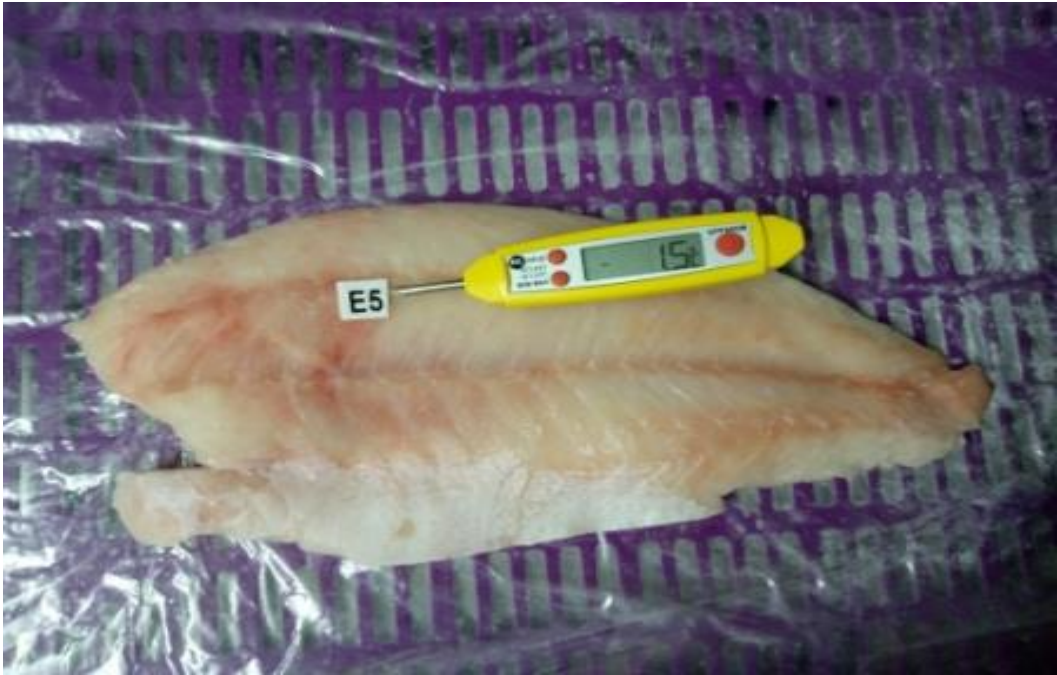

Sample No. E6:

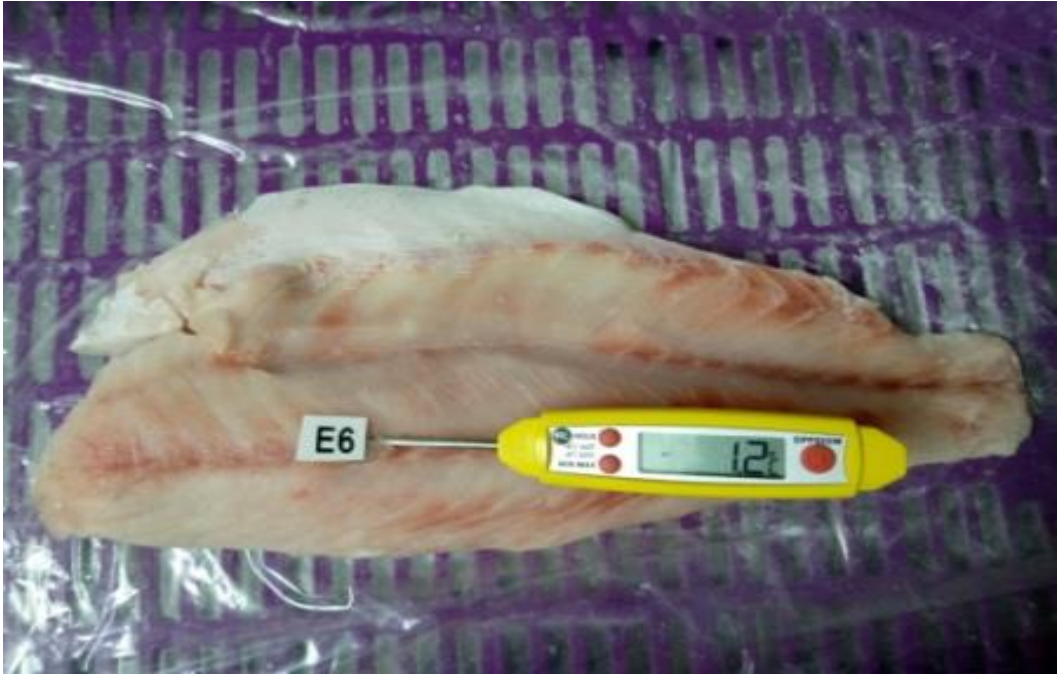

**B) TEMPERATURE RECORDED AFTER 5 HOUR'S OF PACKING: TIME OF CHECKING: 10.30 PM AND TEMPERATURE (°C) OF EACH SAMPLE:**

**Sample No. E1:**

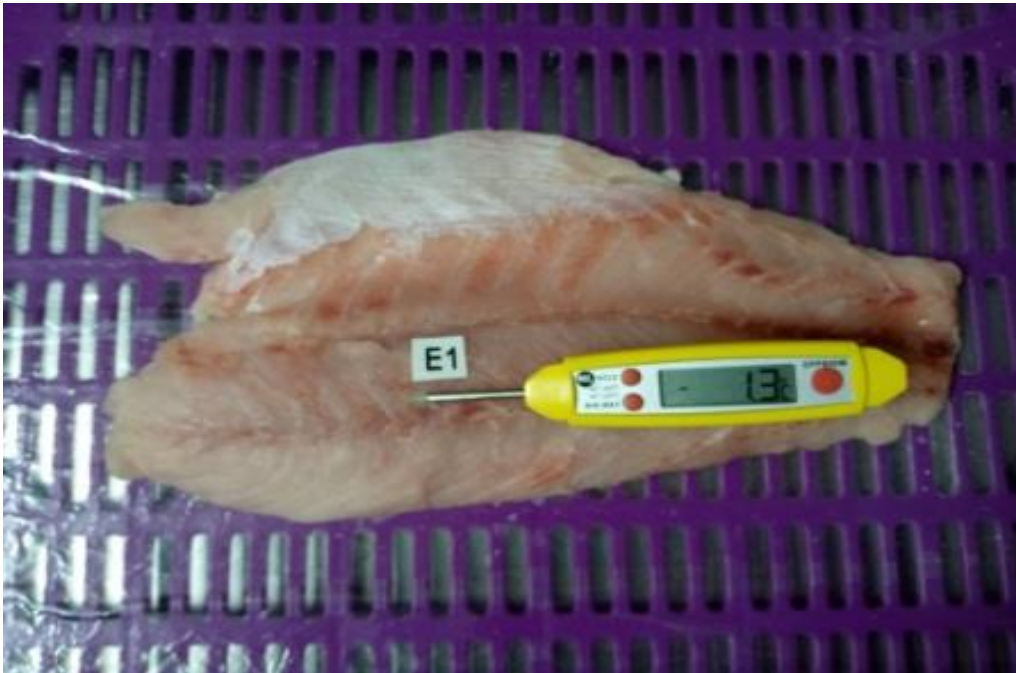

**Sample No. E2:**

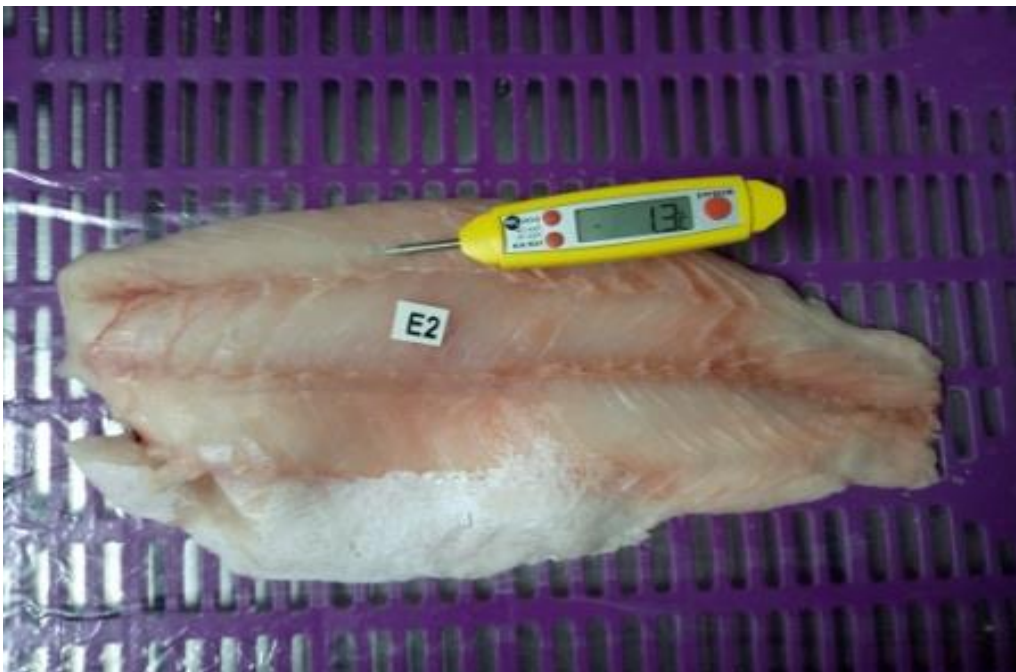

Sample No. E3:

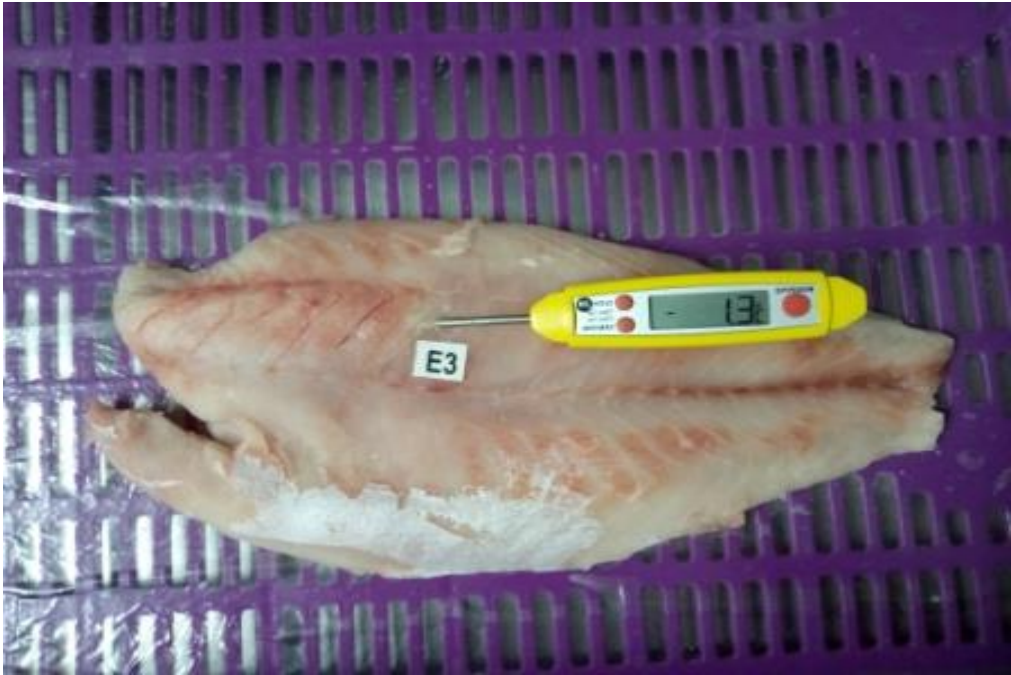

Sample No. E4:

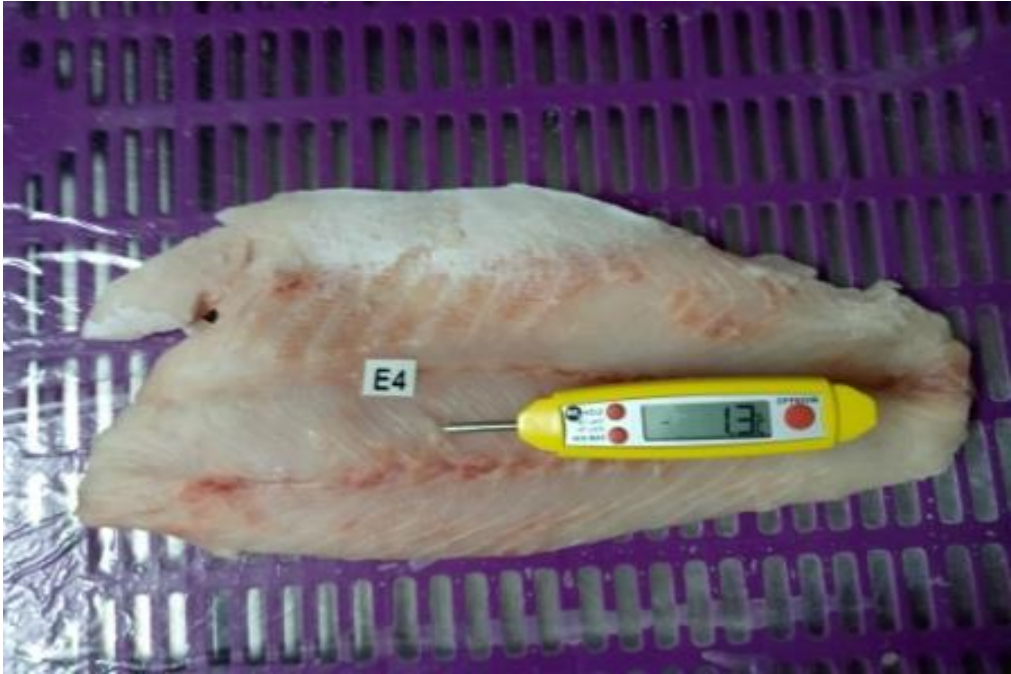

**Sample No. E5:**

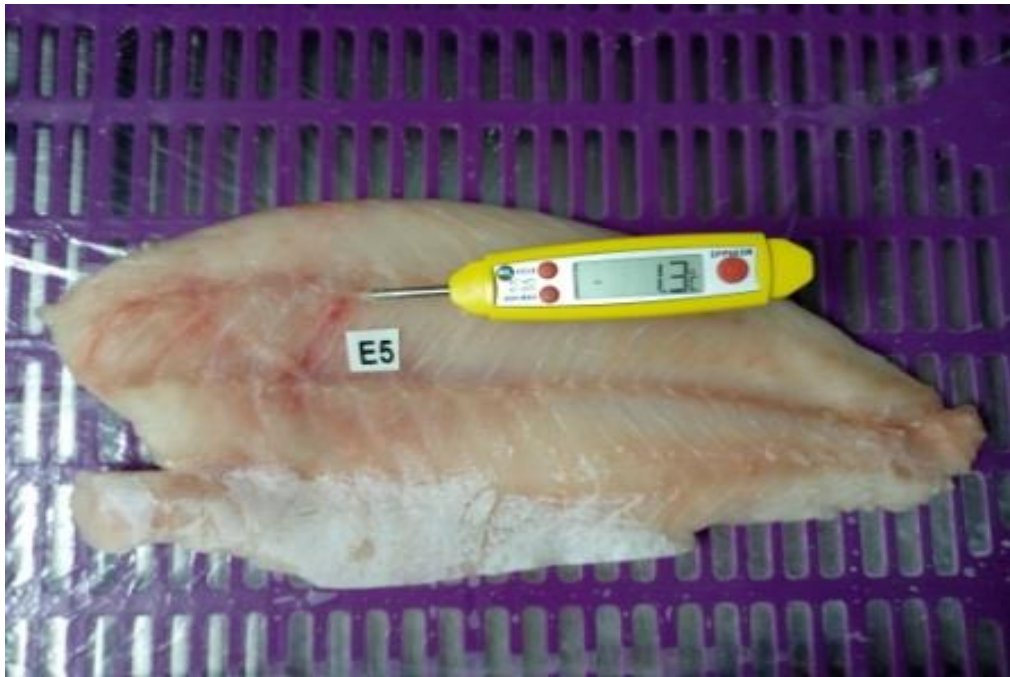

**Sample No. E6:**

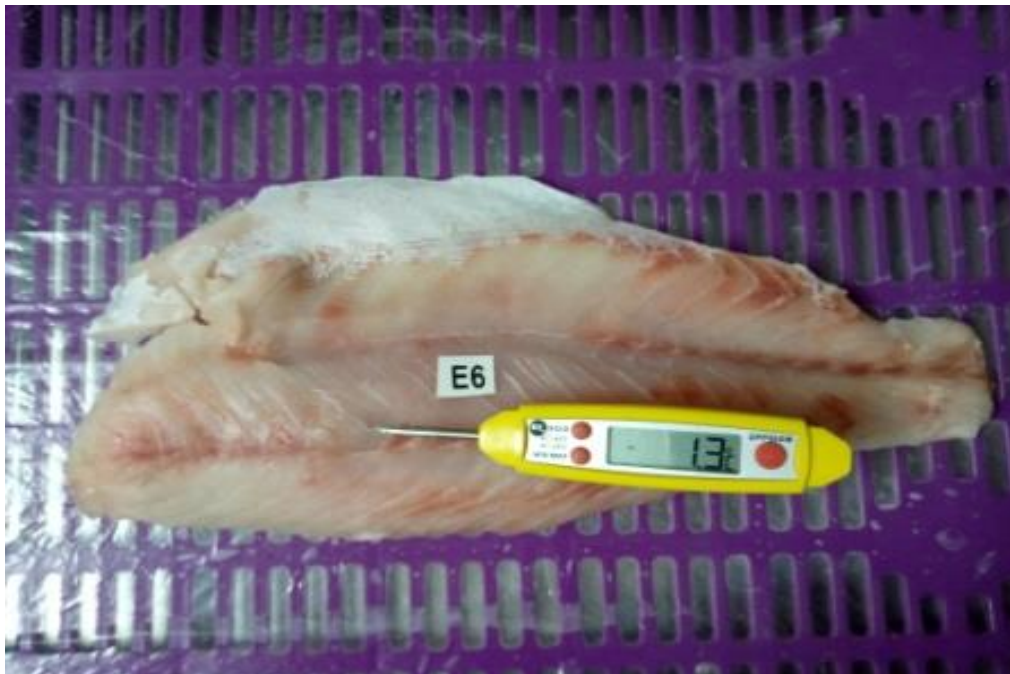

**Inspection Done by: Andrew Elimu - Quality Inspector**

**Verified by: Fred Baghabya - Quality Assurance Manager**

**Authorized by: Faheem Munshi - Production Manager**



## Part II

# Nile perch product temperature

## Superchilling report at Ugandan factory

### 1) Lake Eco Fiorital lot AQ20010915

#### LAKE ECO FISH PROCESSING LIMITED

|         |                               |
|---------|-------------------------------|
| Company | Lake Eco fish processing ltd. |
| Batch   | 189                           |
| Date    | 07/07/2020                    |

#### NILE PERCH SKINLESS FILLETS

|                                                |                                             |
|------------------------------------------------|---------------------------------------------|
| START: Before entering the super chilling room | STOP: After exiting the super chilling room |
|------------------------------------------------|---------------------------------------------|

|                           |         |                            |         |
|---------------------------|---------|----------------------------|---------|
| Start core temperature    | 3.0°C   | Finish core temperature    | -1.3°C  |
| Start time super chilling | 07:30am | Finish time super chilling | 08:10am |
| Temperature chilling room | -5°C    | Temperature chilling room  | -7°C    |

|                           |         |                            |         |
|---------------------------|---------|----------------------------|---------|
| Start core temperature    | 3.3°C   | Finish core temperature    | -1.5°C  |
| Start time super chilling | 08:15am | Finish time super chilling | 09:00am |
| Temperature chilling room | -7°C    | Temperature chilling room  | -8°C    |

|                           |         |                            |         |
|---------------------------|---------|----------------------------|---------|
| Start core temperature    | 3.1°C   | Finish core temperature    | -1.6°C  |
| Start time super chilling | 09:05am | Finish time super chilling | 09:45am |
| Temperature chilling room | -7°C    | Temperature chilling room  | -9°C    |

|                           |         |                            |         |
|---------------------------|---------|----------------------------|---------|
| Start core temperature    | 3.3°C   | Finish core temperature    | -1.5°C  |
| Start time super chilling | 09:50am | Finish time super chilling | 10:30am |
| Temperature chilling room | -6°C    | Temperature chilling room  | -8°C    |

|                           |         |                            |         |
|---------------------------|---------|----------------------------|---------|
| Start core temperature    | 3.1°C   | Finish core temperature    | -1.8°C  |
| Start time super chilling | 10:40am | Finish time super chilling | 11:25am |
| Temperature chilling room | -9°C    | Temperature chilling room  | -10°C   |

|                           |         |                            |         |
|---------------------------|---------|----------------------------|---------|
| Start core temperature    | 3.1°C   | Finish core temperature    | -1.5°C  |
| Start time super chilling | 11:30am | Finish time super chilling | 12:15pm |
| Temperature chilling room | -10°C   | Temperature chilling room  | -11°C   |

|                           |         |                            |        |
|---------------------------|---------|----------------------------|--------|
| Start core temperature    | 3.3°C   | Finish core temperature    | -1.8°C |
| Start time super chilling | 12:20pm | Finish time super chilling | 1:03pm |
| Temperature chilling room | -9°C    | Temperature chilling room  | -11°C  |

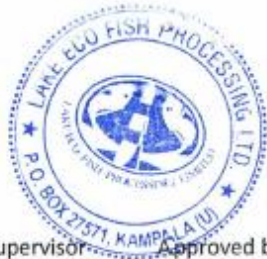

Prepared by:  Quality supervisor

Approved by:  Quality Manager

2) Lake bounty Fiorital lot AQ20010914

LAKE BOUNTY LTD.

|          |                 |
|----------|-----------------|
| Company: | Lake Bounty Ltd |
| Lot:     | B283LB          |
| Date:    | 06.07.2020      |

| START: Before entering the superchilling room |         | STOP: After exiting the superchilling room |         |
|-----------------------------------------------|---------|--------------------------------------------|---------|
| Start core temperature                        | 3.5°C   | Finish core temperature                    | -1.8°C  |
| Start time superchilling                      | 11:16am | Finish time superchilling                  | 11:56am |
| Temperature chilling room                     | -16.5°C | Temperature chilling room                  | -16.7°C |
| Start core temperature                        | 3.8°C   | Finish core temperature                    | -1.6°C  |
| Start time superchilling                      | 11:29am | Finish time superchilling                  | 12:12pm |
| Temperature chilling room                     | -15.3°C | Temperature chilling room                  | -15.6°C |
| Start core temperature                        | 4.0°C   | Finish core temperature                    | -1.5°C  |
| Start time superchilling                      | 11:38am | Finish time superchilling                  | 12:24pm |
| Temperature chilling room                     | -14.7°C | Temperature chilling room                  | -14.9°C |
| Start core temperature                        | 4.4°C   | Finish core temperature                    | -1.7°C  |
| Start time superchilling                      | 11:42am | Finish time superchilling                  | 12:31pm |
| Temperature chilling room                     | -14.6°C | Temperature chilling room                  | -14.8   |
| Start core temperature                        | 3.9°C   | Finish core temperature                    | -1.4°C  |
| Start time superchilling                      | 11:59am | Finish time superchilling                  | 12:44pm |
| Temperature chilling room                     | -14.9°C | Temperature chilling room                  | -15.5°C |
| Start core temperature                        | 4.1°C   | Finish core temperature                    | -1.9°C  |
| Start time superchilling                      | 12:05pm | Finish time superchilling                  | 12:47pm |
| Temperature chilling room                     | -14.7°C | Temperature chilling room                  | -15.0°C |
| Start core temperature                        | 3.7°C   | Finish core temperature                    | -1.4°C  |
| Start time superchilling                      | 12:18pm | Finish time superchilling                  | 01:02pm |
| Temperature chilling room                     | -14.8°C | Temperature chilling room                  | -15.1°C |
| Start core temperature                        | 4.3°C   | Finish core temperature                    | -1.5°C  |
| Start time superchilling                      | 12:23pm | Finish time superchilling                  | 01:08pm |
| Temperature chilling room                     | -14.5°C | Temperature chilling room                  | -14.9°C |
| Start core temperature                        | 3.4°C   | Finish core temperature                    | -1.7°C  |
| Start time superchilling                      | 12:39pm | Finish time superchilling                  | 01:22pm |
| Temperature chilling room                     | -15.5°C | Temperature chilling room                  | -15.9°C |
| Start core temperature                        | 4.6°C   | Finish core temperature                    | -1.6°C  |
| Start time superchilling                      | 12:47pm | Finish time superchilling                  | 01:33pm |
| Temperature chilling room                     | -15.8°C | Temperature chilling room                  | -16.2°C |

Prepared by: [Signature] Quality supervisor

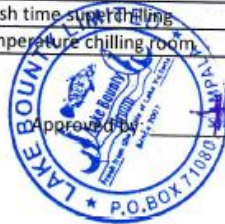

Approved by: [Signature] Quality manager

3) Fresh perch Fiorital lot AQ20010913

|                        |                 |                                            |
|------------------------|-----------------|--------------------------------------------|
| Sample No.<br><b>1</b> | <b>Company;</b> | <b>Fresh Perch Limited, Jinja - Uganda</b> |
|                        | <b>Batch:</b>   | <b>C-2820-011655</b>                       |
|                        | <b>Date:</b>    | <b>07.07.2020</b>                          |

**START: Before entering the Chilling room**

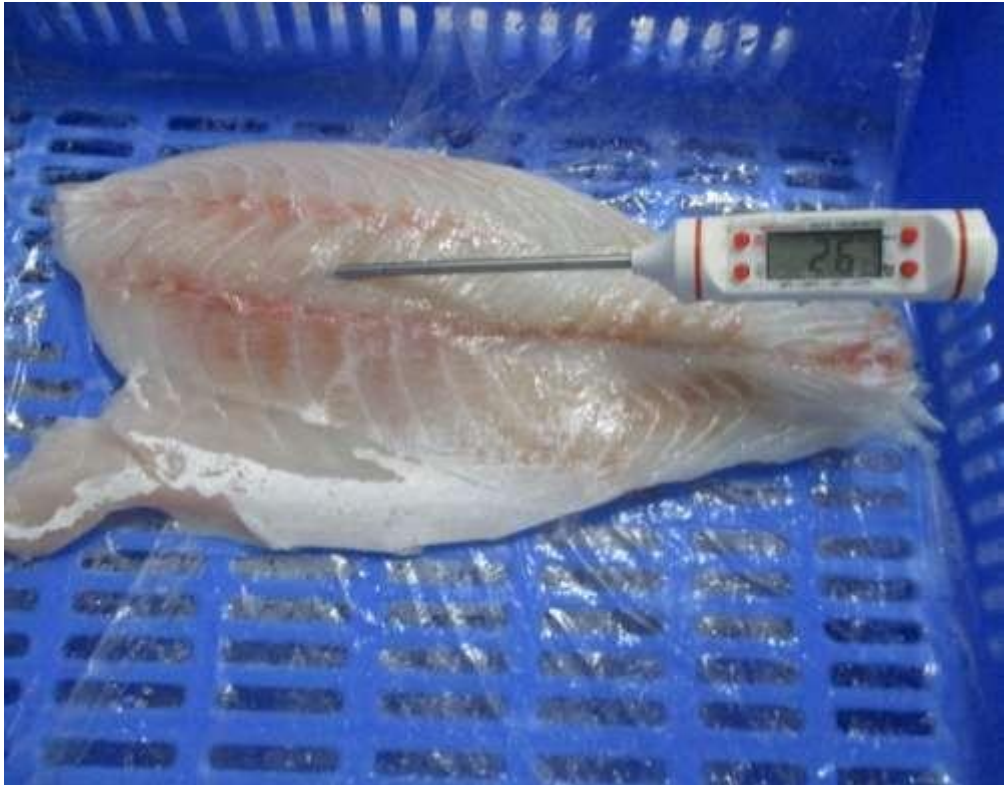

|                                  |                 |
|----------------------------------|-----------------|
| <b>Start core Temperature</b>    | <b>+2.6 ° C</b> |
| <b>Start time chilling</b>       | <b>07.25 am</b> |
| <b>Temperature chilling room</b> | <b>-25 ° C</b>  |

**STOP: After exiting the Chilling room**

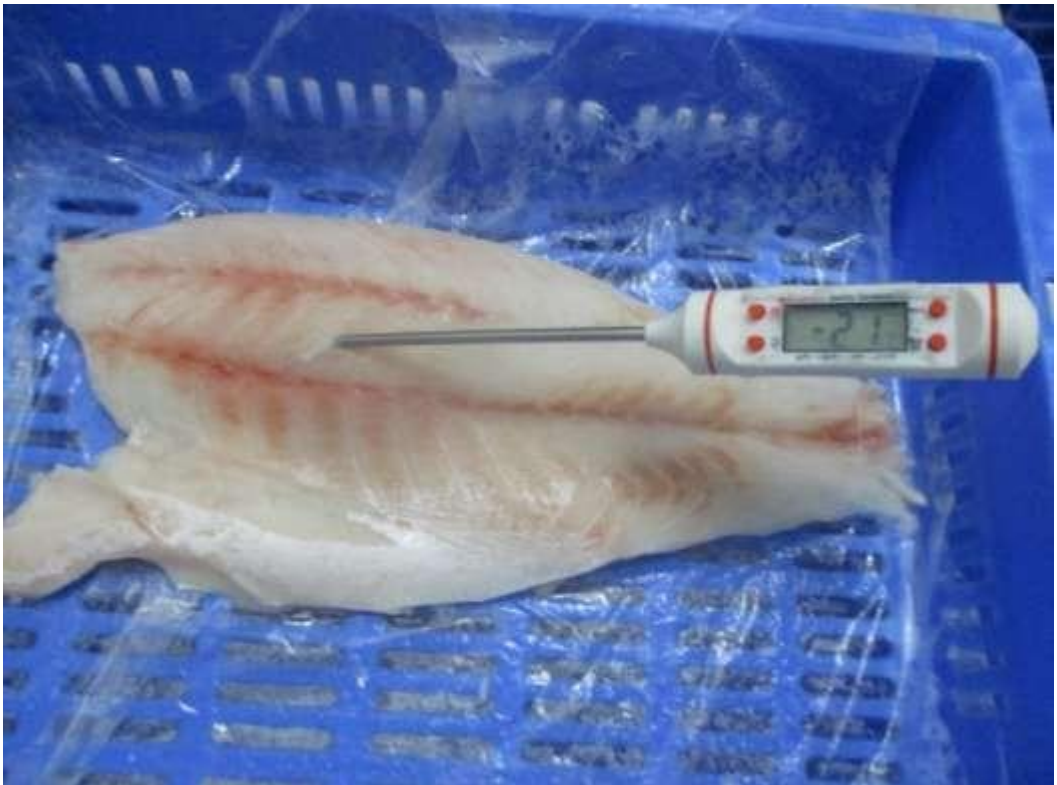

|                                  |                 |
|----------------------------------|-----------------|
| <b>Finish core Temperature</b>   | <b>-2.1 ° C</b> |
| <b>Finish time chilling</b>      | <b>08.12 am</b> |
| <b>Temperature chilling room</b> | <b>-25 ° C</b>  |

Sample No.

2

|                 |                                            |
|-----------------|--------------------------------------------|
| <b>Company;</b> | <b>Fresh Perch Limited, Jinja - Uganda</b> |
| <b>Batch:</b>   | <b>C-2820-011655</b>                       |
| <b>Date:</b>    | <b>07.07.2020</b>                          |

**START: Before entering  
the Chilling room**

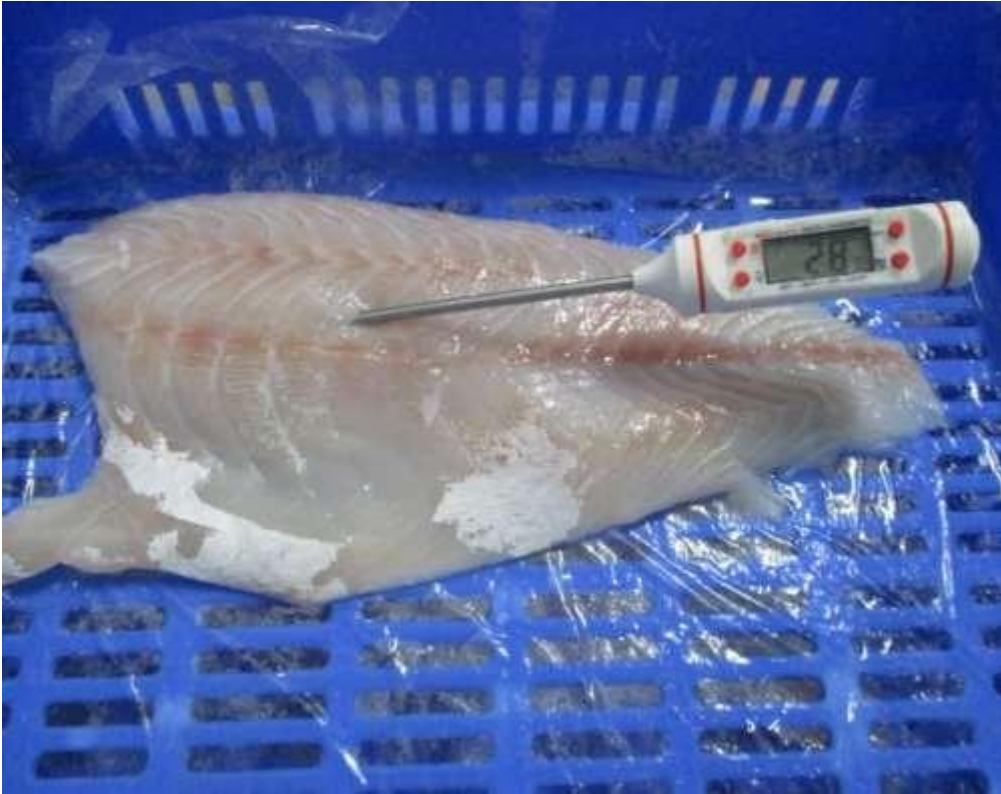

|                                  |                 |
|----------------------------------|-----------------|
| <b>Start core Temperature</b>    | <b>+2.8 ° C</b> |
| <b>Start time chilling</b>       | <b>07.30 am</b> |
| <b>Temperature chilling room</b> | <b>-25 ° C</b>  |

**STOP: After exiting the  
Chilling room**

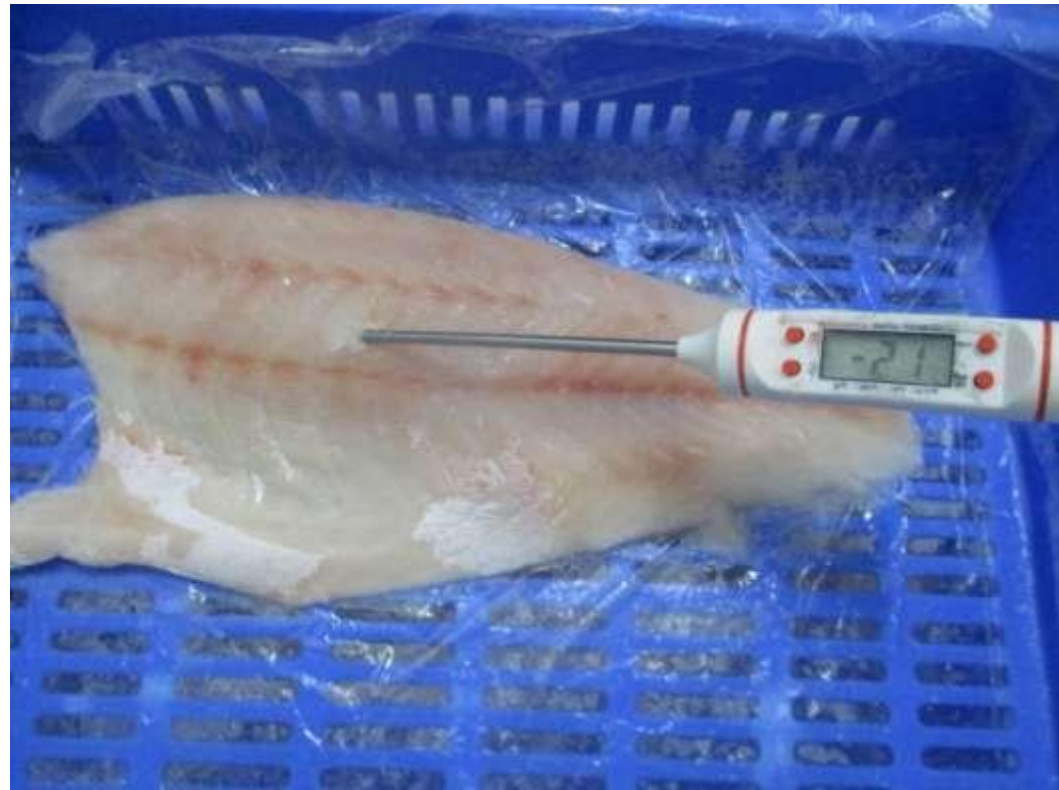

|                                  |                 |
|----------------------------------|-----------------|
| <b>Finish core Temperature</b>   | <b>-2.1 ° C</b> |
| <b>Finish time chilling</b>      | <b>08.17 am</b> |
| <b>Temperature chilling room</b> | <b>-25 ° C</b>  |

Sample No.

3

|                 |                                            |
|-----------------|--------------------------------------------|
| <b>Company;</b> | <b>Fresh Perch Limited, Jinja - Uganda</b> |
| <b>Batch:</b>   | <b>C-2820-011655</b>                       |
| <b>Date:</b>    | <b>07.07.2020</b>                          |

**START: Before entering  
the Chilling room**

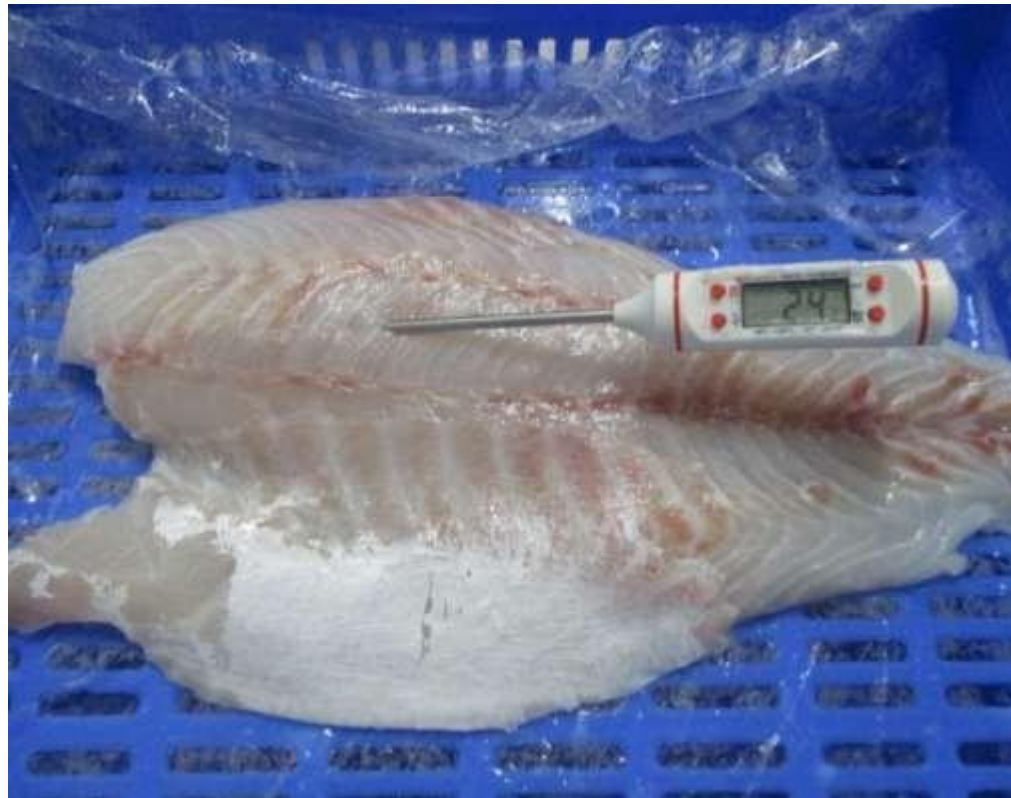

|                                  |                 |
|----------------------------------|-----------------|
| <b>Start core Temperature</b>    | <b>+2.4 ° C</b> |
| <b>Start time chilling</b>       | <b>07.42 am</b> |
| <b>Temperature chilling room</b> | <b>-25 ° C</b>  |

**STOP: After exiting the  
Chilling room**

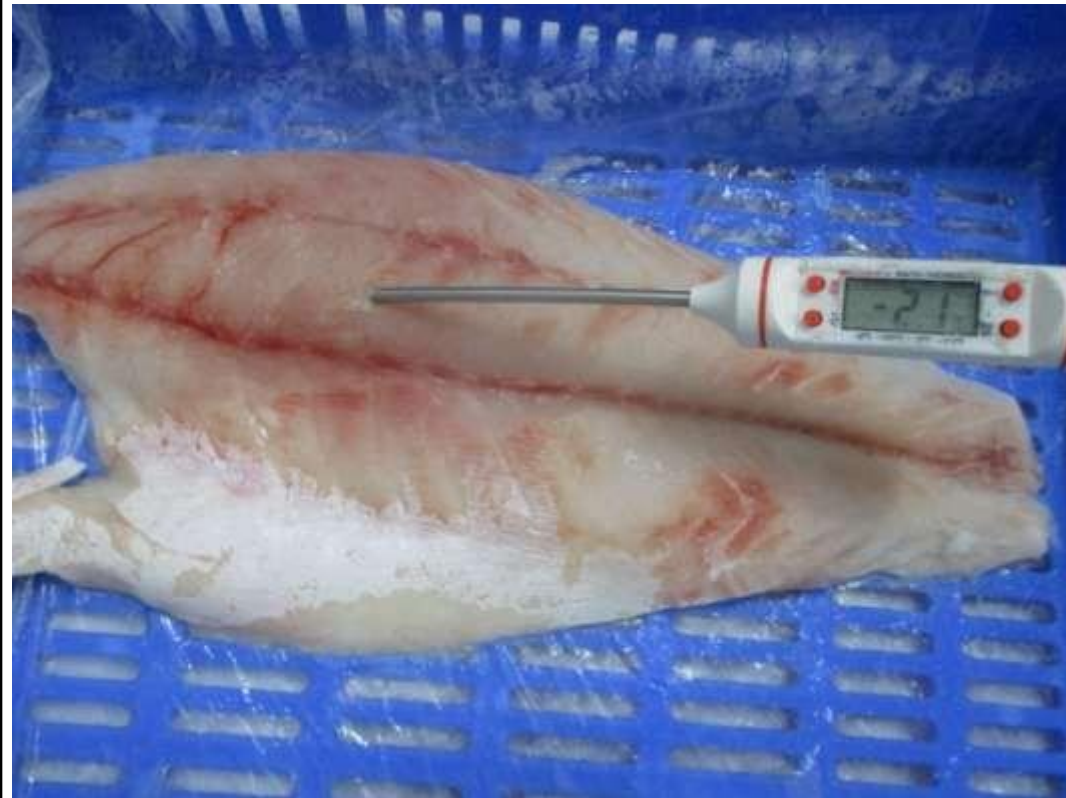

|                                  |                 |
|----------------------------------|-----------------|
| <b>Finish core Temperature</b>   | <b>-2.1 ° C</b> |
| <b>Finish time chilling</b>      | <b>08.30 am</b> |
| <b>Temperature chilling room</b> | <b>-25 ° C</b>  |

Sample No.

4

|                 |                                            |
|-----------------|--------------------------------------------|
| <b>Company;</b> | <b>Fresh Perch Limited, Jinja - Uganda</b> |
| <b>Batch:</b>   | <b>C-2820-011655</b>                       |
| <b>Date:</b>    | <b>07.07.2020</b>                          |

**START: Before entering  
the Chilling room**

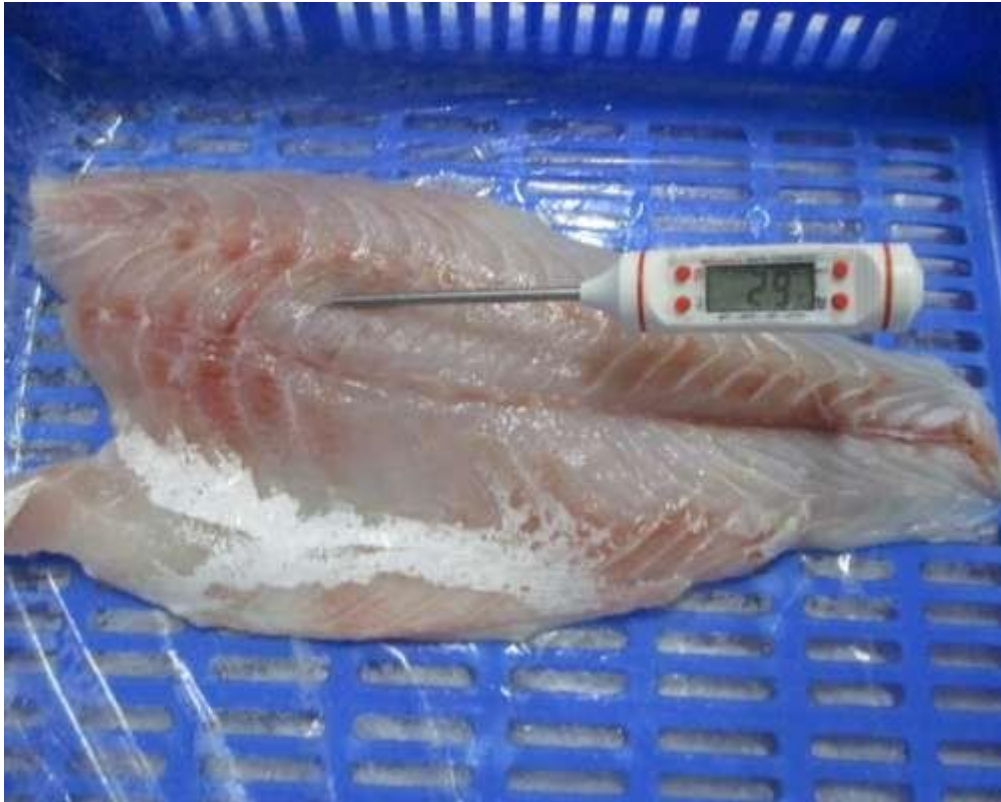

|                                  |                 |
|----------------------------------|-----------------|
| <b>Start core Temperature</b>    | <b>+2.9 ° C</b> |
| <b>Start time chilling</b>       | <b>07.50 am</b> |
| <b>Temperature chilling room</b> | <b>-25° C</b>   |

**STOP: After exiting the  
Chilling room**

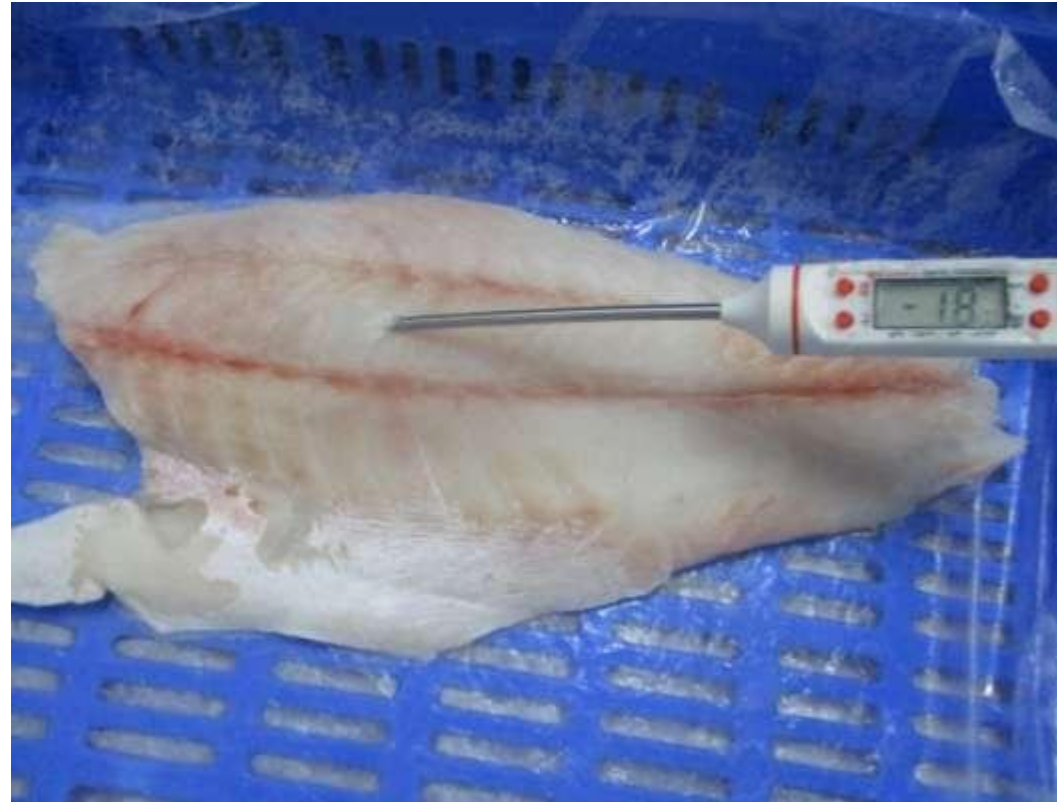

|                                  |                 |
|----------------------------------|-----------------|
| <b>Finish core Temperature</b>   | <b>-1.8 ° C</b> |
| <b>Finish time chilling</b>      | <b>08.36 am</b> |
| <b>Temperature chilling room</b> | <b>-25 ° C</b>  |

Sample No.

5

|                 |                                            |
|-----------------|--------------------------------------------|
| <b>Company;</b> | <b>Fresh Perch Limited, Jinja - Uganda</b> |
| <b>Batch:</b>   | <b>C-2820-011655</b>                       |
| <b>Date:</b>    | <b>07.07.2020</b>                          |

**START: Before entering  
the Chilling room**

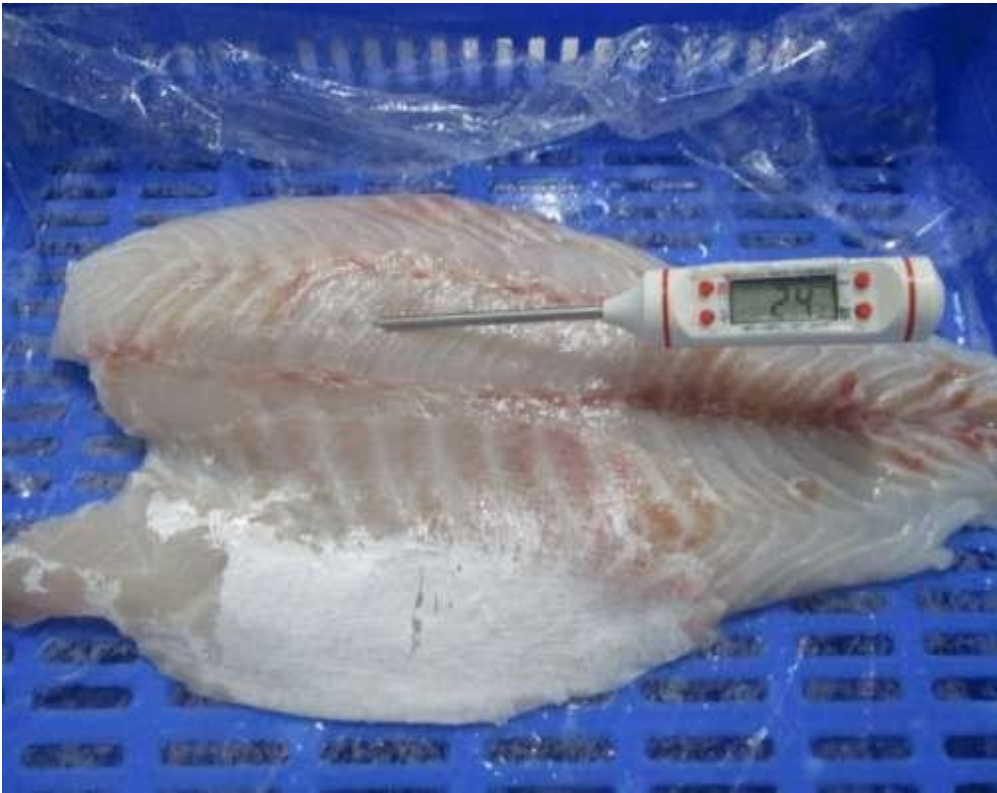

|                                  |                 |
|----------------------------------|-----------------|
| <b>Start core Temperature</b>    | <b>+2.4 ° C</b> |
| <b>Start time chilling</b>       | <b>08.00 am</b> |
| <b>Temperature chilling room</b> | <b>-25 ° C</b>  |

**STOP: After exiting the  
Chilling room**

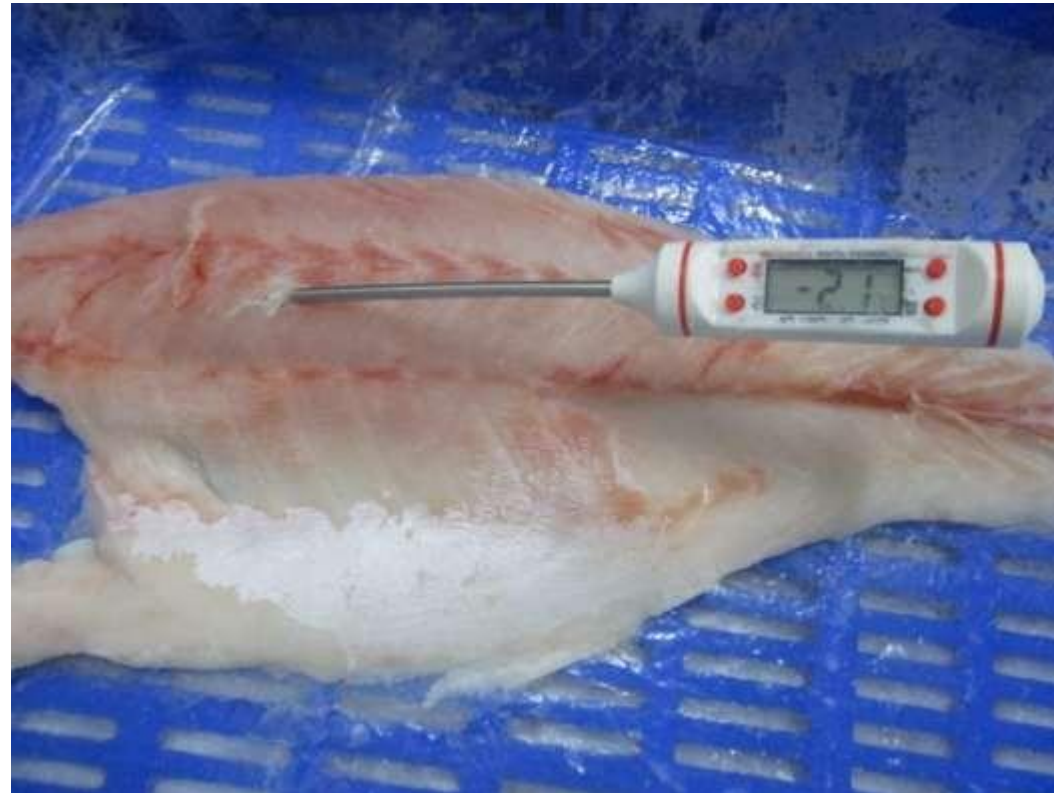

|                                  |                 |
|----------------------------------|-----------------|
| <b>Finish core Temperature</b>   | <b>-2.1 ° C</b> |
| <b>Finish time chilling</b>      | <b>08.48 am</b> |
| <b>Temperature chilling room</b> | <b>-25 ° C</b>  |



Sample No.

6

|                 |                                            |
|-----------------|--------------------------------------------|
| <b>Company;</b> | <b>Fresh Perch Limited, Jinja - Uganda</b> |
| <b>Batch:</b>   | <b>C-2820-011655</b>                       |
| <b>Date:</b>    | <b>07.07.2020</b>                          |

**START: Before entering  
the Chilling room**

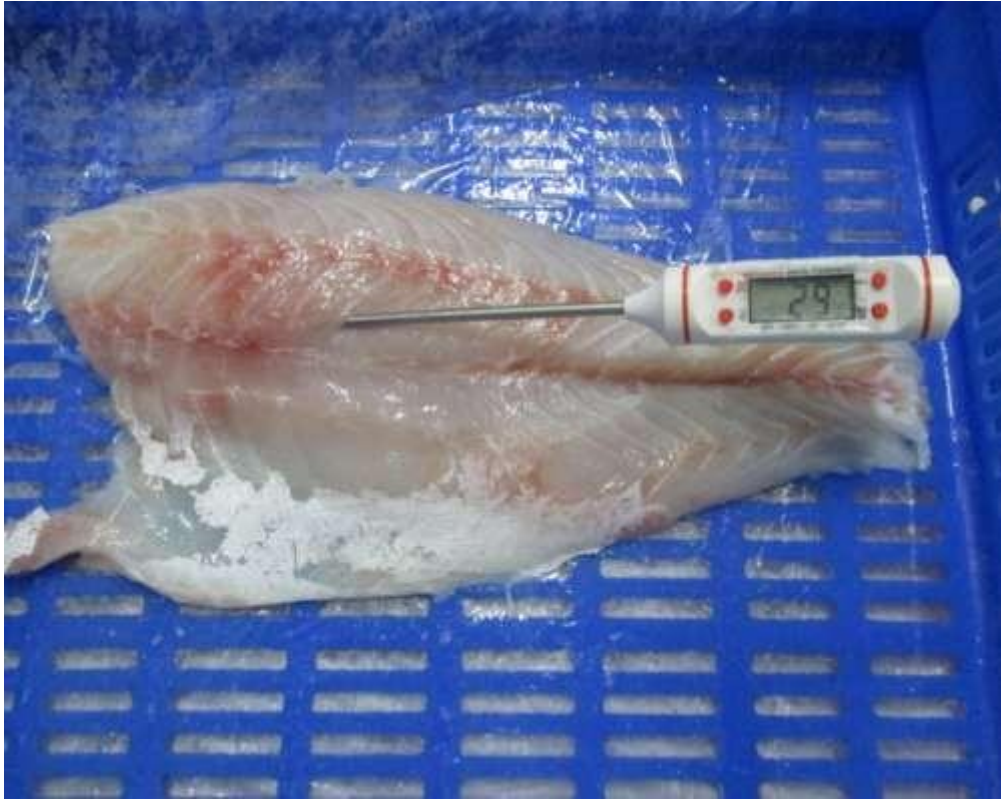

|                                  |                 |
|----------------------------------|-----------------|
| <b>Start core Temperature</b>    | <b>+2.9 ° C</b> |
| <b>Start time chilling</b>       | <b>08.14 am</b> |
| <b>Temperature chilling room</b> | <b>-25 ° C</b>  |

**STOP: After exiting the  
Chilling room**

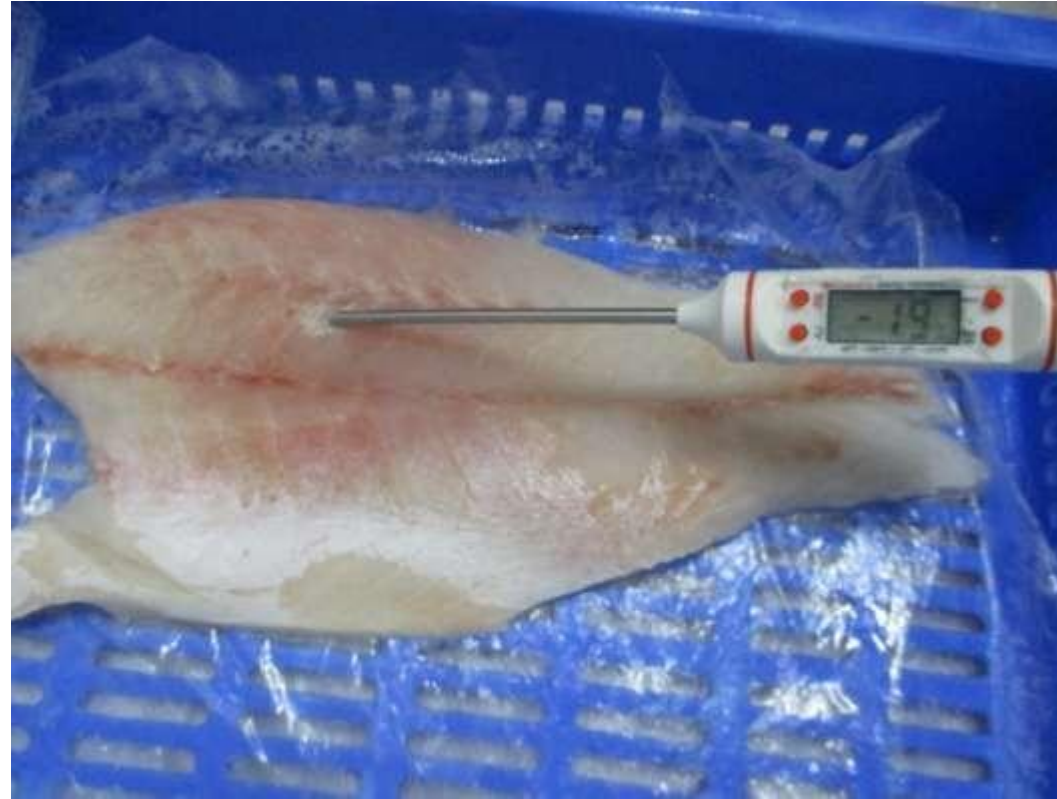

|                                  |                 |
|----------------------------------|-----------------|
| <b>Finish core Temperature</b>   | <b>-1.9 ° C</b> |
| <b>Finish time chilling</b>      | <b>09.00 am</b> |
| <b>Temperature chilling room</b> | <b>-25 ° C</b>  |

Sample No.

7

|                 |                                            |
|-----------------|--------------------------------------------|
| <b>Company;</b> | <b>Fresh Perch Limited, Jinja - Uganda</b> |
| <b>Batch:</b>   | <b>C-2820-011655</b>                       |
| <b>Date:</b>    | <b>07.07.2020</b>                          |

**START: Before entering  
the Chilling room**

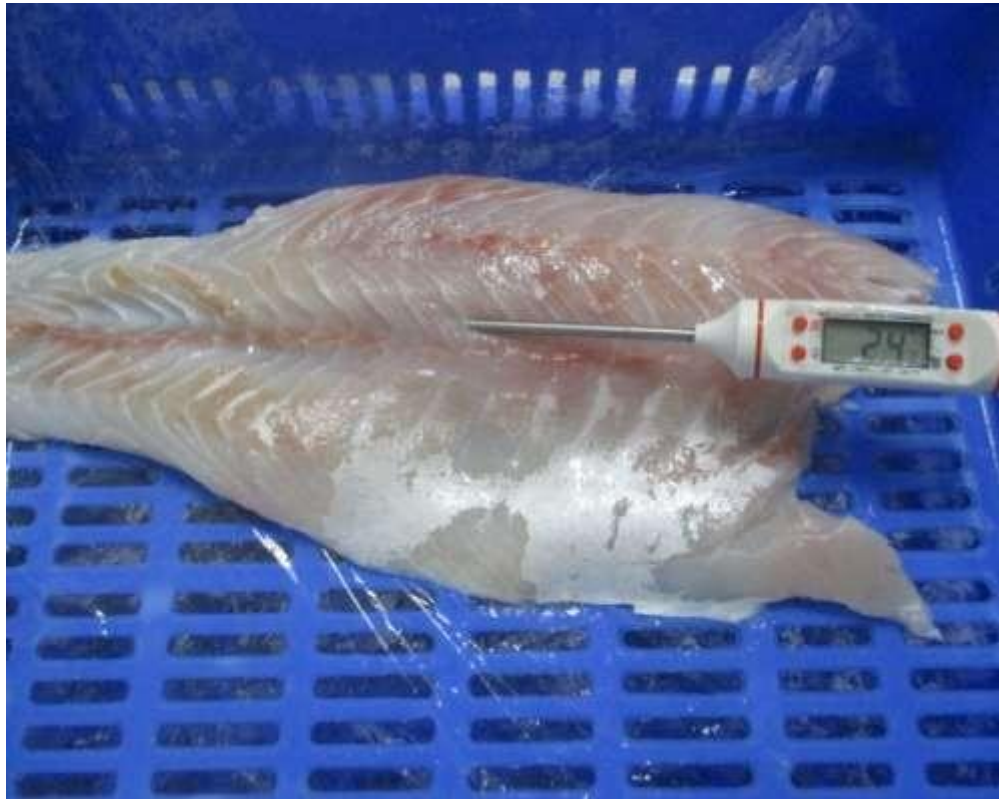

|                                  |                 |
|----------------------------------|-----------------|
| <b>Start core Temperature</b>    | <b>+2.4 ° C</b> |
| <b>Start time chilling</b>       | <b>08.20 am</b> |
| <b>Temperature chilling room</b> | <b>-25 ° C</b>  |

**STOP: After exiting the  
Chilling room**

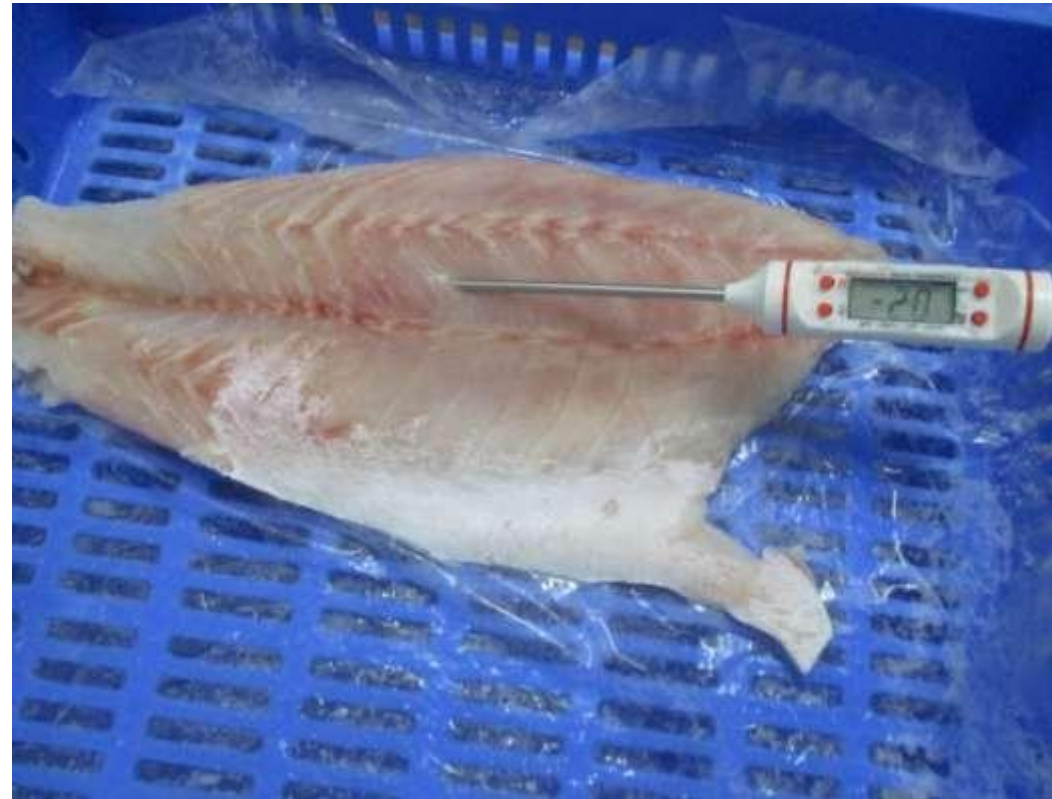

|                                  |                 |
|----------------------------------|-----------------|
| <b>Finish core Temperature</b>   | <b>-2.0 ° C</b> |
| <b>Finish time chilling</b>      | <b>09.07 am</b> |
| <b>Temperature chilling room</b> | <b>-25 ° C</b>  |

Sample No.

8

|                 |                                            |
|-----------------|--------------------------------------------|
| <b>Company;</b> | <b>Fresh Perch Limited, Jinja - Uganda</b> |
| <b>Batch:</b>   | <b>C-2820-011655</b>                       |
| <b>Date:</b>    | <b>07.07.2020</b>                          |

**START: Before entering  
the Chilling room**

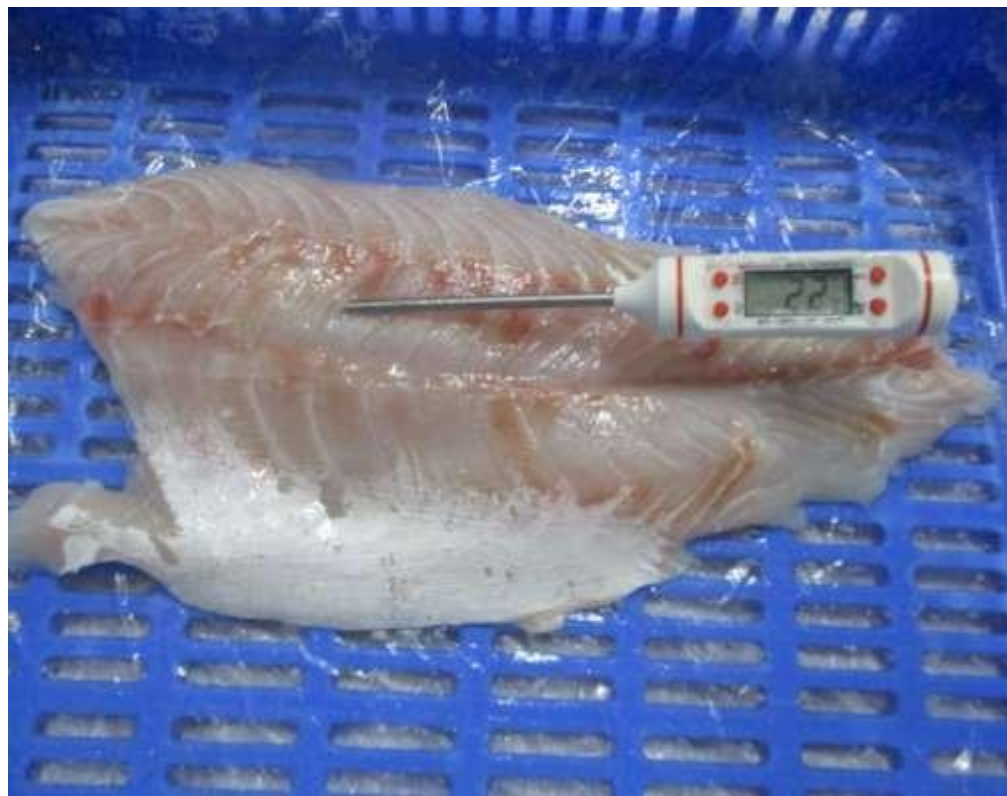

|                                  |                 |
|----------------------------------|-----------------|
| <b>Start core Temperature</b>    | <b>+2.2 ° C</b> |
| <b>Start time chilling</b>       | <b>08.26 am</b> |
| <b>Temperature chilling room</b> | <b>-25 ° C</b>  |

**STOP: After exiting the  
Chilling room**

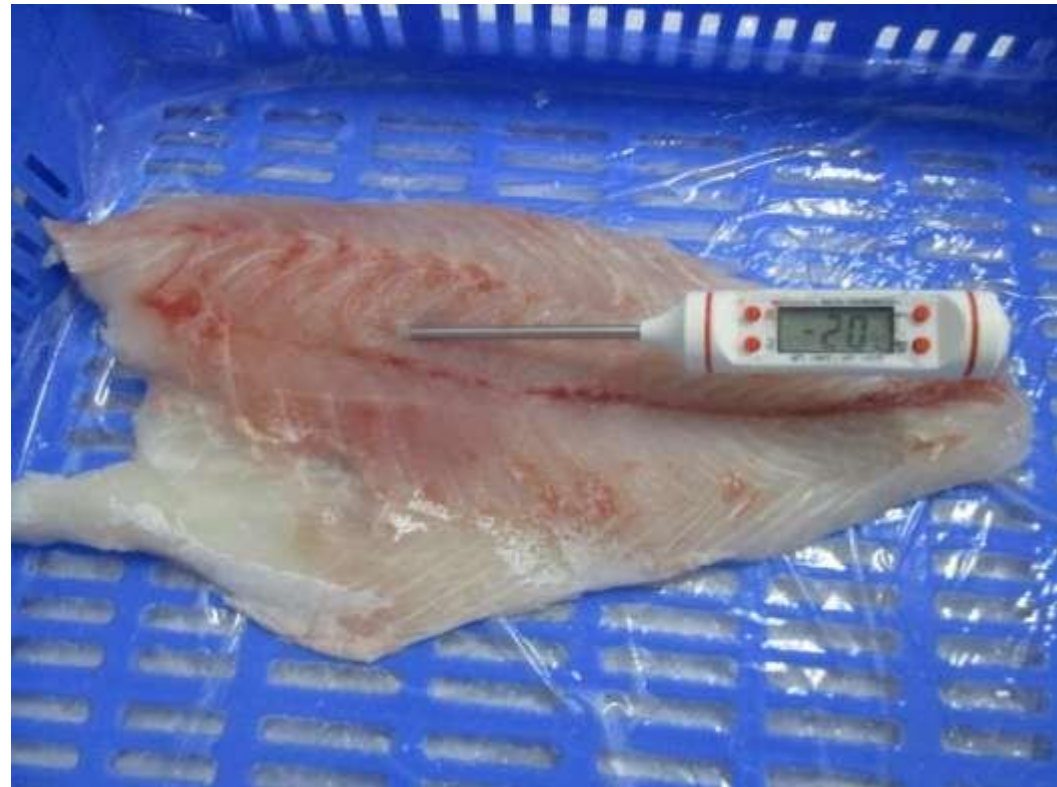

|                                  |                 |
|----------------------------------|-----------------|
| <b>Finish core Temperature</b>   | <b>-2.0 ° C</b> |
| <b>Finish time chilling</b>      | <b>09.13 am</b> |
| <b>Temperature chilling room</b> | <b>-25 ° C</b>  |

Sample No.

9

|                 |                                            |
|-----------------|--------------------------------------------|
| <b>Company;</b> | <b>Fresh Perch Limited, Jinja - Uganda</b> |
| <b>Batch:</b>   | <b>C-2820-011655</b>                       |
| <b>Date:</b>    | <b>07.07.2020</b>                          |

**START: Before entering the Chilling room**

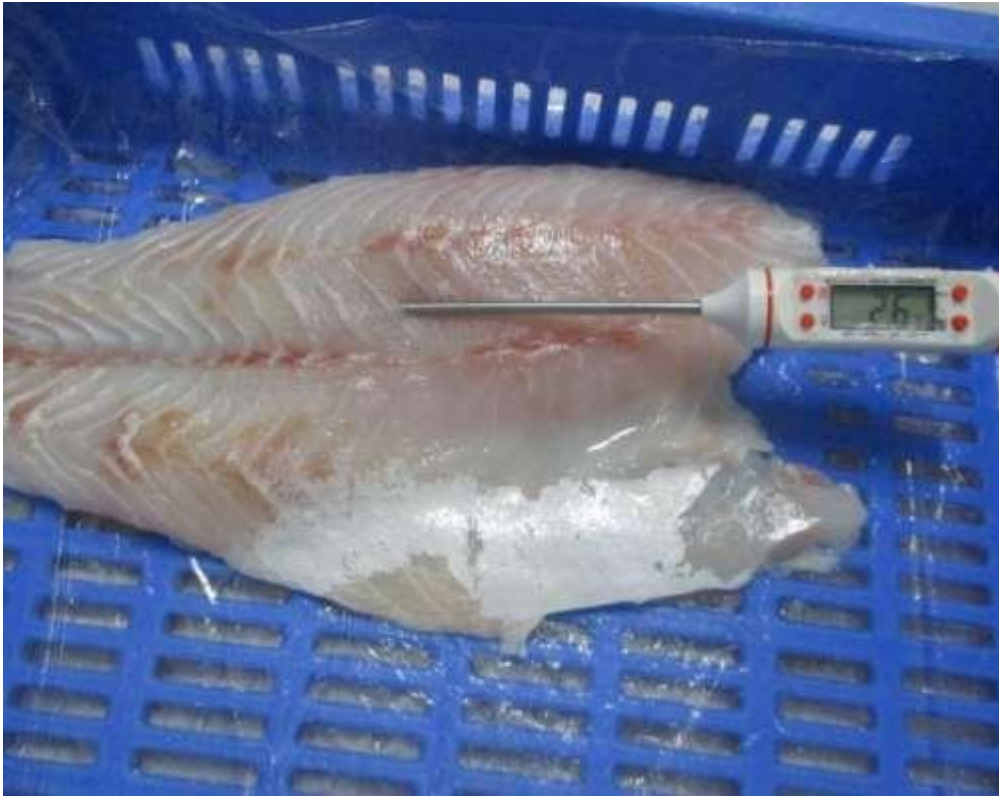

|                                  |                 |
|----------------------------------|-----------------|
| <b>Start core Temperature</b>    | <b>+2.6 ° C</b> |
| <b>Start time chilling</b>       | <b>08.30 am</b> |
| <b>Temperature chilling room</b> | <b>-25 ° C</b>  |

**STOP: After exiting the Chilling room**

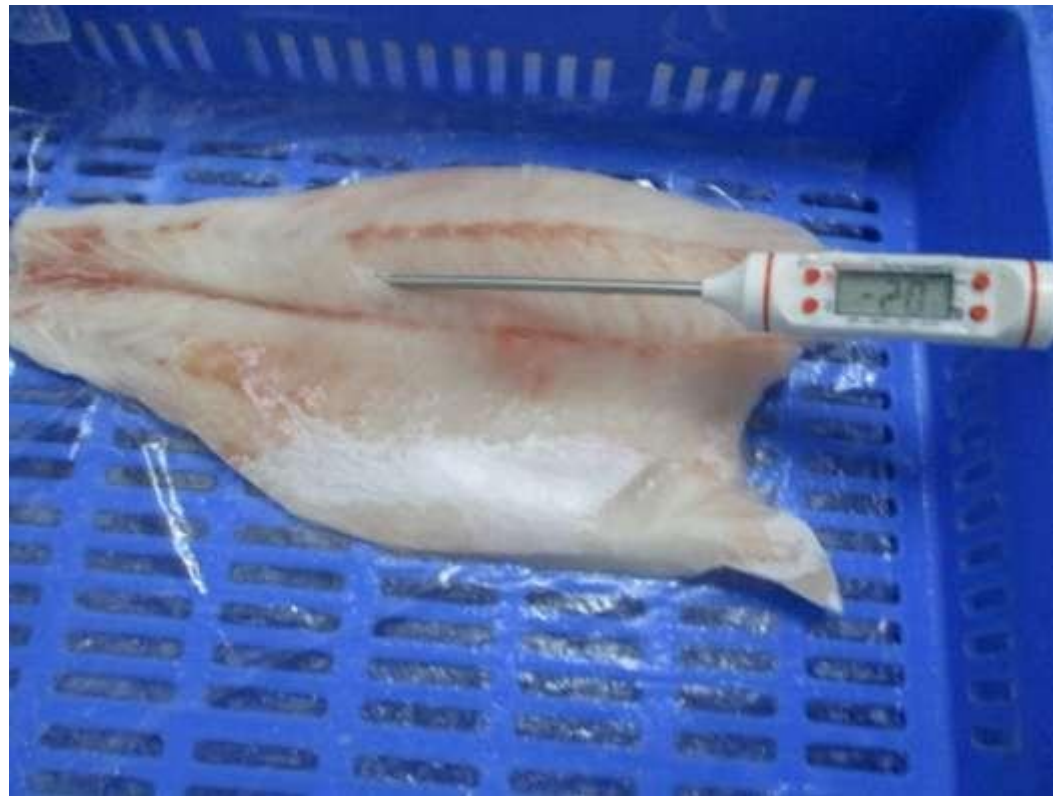

|                                  |                 |
|----------------------------------|-----------------|
| <b>Finish core Temperature</b>   | <b>-2.0 ° C</b> |
| <b>Finish time chilling</b>      | <b>09.18 am</b> |
| <b>Temperature chilling room</b> | <b>-25 ° C</b>  |

Sample No.

10

|                 |                                            |
|-----------------|--------------------------------------------|
| <b>Company;</b> | <b>Fresh Perch Limited, Jinja - Uganda</b> |
| <b>Batch:</b>   | <b>C-2820-011655</b>                       |
| <b>Date:</b>    | <b>07.07.2020</b>                          |

**START: Before entering  
the Chilling room**

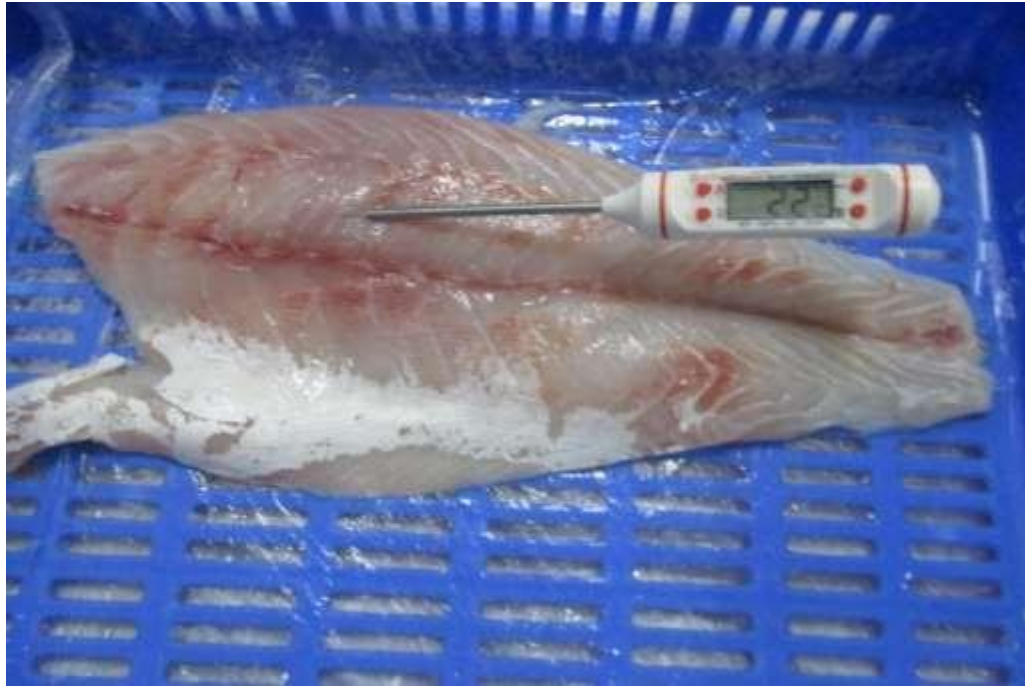

|                                  |                 |
|----------------------------------|-----------------|
| <b>Start core Temperature</b>    | <b>+2.2 ° C</b> |
| <b>Start time chilling</b>       | <b>08.43 am</b> |
| <b>Temperature chilling room</b> | <b>-25 ° C</b>  |

**STOP: After exiting the  
Chilling room**

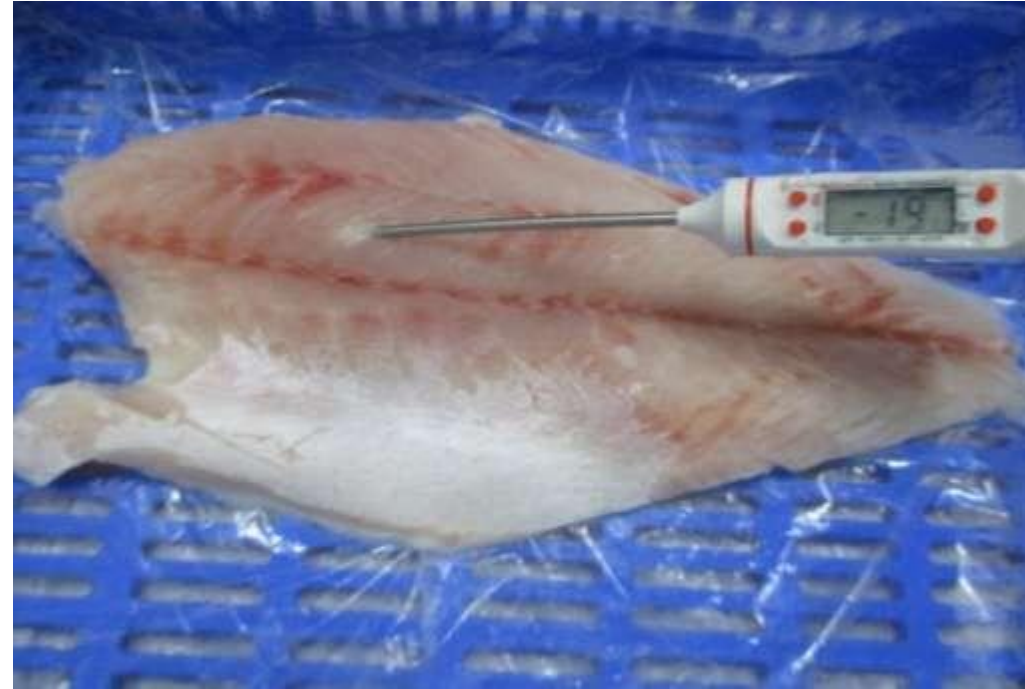

|                                  |                 |
|----------------------------------|-----------------|
| <b>Finish core Temperature</b>   | <b>-1.9 ° C</b> |
| <b>Finish time chilling</b>      | <b>09.30 am</b> |
| <b>Temperature chilling room</b> | <b>-25 ° C</b>  |

Temperature checks at Entebbe airport (Uganda) before departure to Liege airport (Belgium)

1) Lake eco Fiorital lot AQ20010915



**National Aviation Se**

Cargo department

Fish acceptance and temp. Data control sheet

NAME OF SHIPPER: L. Eco DATE: 07-07-2020  
 FLIGHT NO.: ET, AFD APT OF DEST.: JED

| VEHICLE REG NO. | ARRIVAL TIME | ULD LOADED | NO OF PIECES | QTY RECEIVED FOR EXPORT | NO OF BOXES SAMPLED | TEMPERATURE RANGE RECORDED AT DELIVERY | BATCH NO/ EXPIRY DATE | CONSIGNEE   | REMARKS    |
|-----------------|--------------|------------|--------------|-------------------------|---------------------|----------------------------------------|-----------------------|-------------|------------|
|                 | 1217H        | AVE5623G   | 251          | 1066                    | 10                  | -1.0 - -1.4                            | 21/07/20              | Youssef ABU | /          |
|                 | 1253H        | RC01104H   | 300          | 1851                    | 10                  | -1.2 - -1.7                            | 22/07/20              | Fiorital    | temp<br>OK |
|                 |              |            |              |                         |                     |                                        |                       |             |            |
|                 |              |            |              |                         |                     |                                        |                       |             |            |
|                 |              |            |              |                         |                     |                                        |                       |             |            |
|                 |              |            |              |                         |                     |                                        |                       |             |            |
|                 |              |            |              |                         |                     |                                        |                       |             |            |
|                 |              |            |              |                         |                     |                                        |                       |             |            |

I DECLARE THAT THE INFORMATION ABOVE IS CORRECT AND TRUE TO THE BEST OF MY KNOWLEDGE

SHIPPER'S NAME: L. Eco LTD QUALITY CONTROLLER: OTARA JATA  
 SIGNATURE: [Signature] SIGNATURE: [Signature]  
 DATE: 07-07-2020 DATE: 07-07-2020

|                   |              |                             |                 |                                  |
|-------------------|--------------|-----------------------------|-----------------|----------------------------------|
| Ref. No.: NCGO-04 | Page: 1 of 1 | Issue No.: Date: 12.03.2018 | Rev. No.: Date: | Effective Date: Date: 12.03.2018 |
|-------------------|--------------|-----------------------------|-----------------|----------------------------------|

2) Lake Bounty Fiorital lot AQ20010914



**National Aviation Se**

Cargo department

Fish acceptance and temp. Data control sheet

NAME OF SHIPPER: L. Bounty DATE: 07-07-2020  
 FLIGHT NO.: ADJ APT OF DEST.: LAG

| VEHICLE REG NO. | ARRIVAL TIME | ULD LOADED | NO OF PIECES | QTY RECEIVED FOR EXPORT | NO OF BOXES SAMPLED | TEMPERATURE RANGE RECORDED AT DELIVERY | BATCH NO/ EXPIRY DATE | CONSIGNEE | REMARKS |
|-----------------|--------------|------------|--------------|-------------------------|---------------------|----------------------------------------|-----------------------|-----------|---------|
| UAC             | 1003H        | PMC01142H  | 802          | 2703                    | 10                  | -1.0 - -1.6                            | 21-7-20               | Fiorital  | temp    |
| 021Z            |              | PMC01104H  | 101          | 1384                    | 10                  | -1.3 - -2.0                            | 21-7-20               | Fiorital  | OK      |
|                 |              |            |              |                         |                     |                                        |                       |           |         |
|                 |              |            |              |                         |                     |                                        |                       |           |         |
|                 |              |            |              |                         |                     |                                        |                       |           |         |
|                 |              |            |              |                         |                     |                                        |                       |           |         |
|                 |              |            |              |                         |                     |                                        |                       |           |         |
|                 |              |            |              |                         |                     |                                        |                       |           |         |

I DECLARE THAT THE INFORMATION ABOVE IS CORRECT AND TRUE TO THE BEST OF MY KNOWLEDGE

SHIPPER'S NAME: Lake Bounty Ltd QUALITY CONTROLLER: OTARA JATA  
 SIGNATURE: [Signature] SIGNATURE: [Signature]  
 DATE: 07-07-2020 DATE: 07-07-2020

|                   |              |                             |                 |                                  |
|-------------------|--------------|-----------------------------|-----------------|----------------------------------|
| Ref. No.: NCGO-04 | Page: 1 of 1 | Issue No.: Date: 12.03.2018 | Rev. No.: Date: | Effective Date: Date: 12.03.2018 |
|-------------------|--------------|-----------------------------|-----------------|----------------------------------|

3) Fresh perch Fiorital lot AQ20010913

|                                                                                  |                                              |
|----------------------------------------------------------------------------------|----------------------------------------------|
|  | <b>National Aviation Se</b>                  |
|                                                                                  | Cargo department                             |
|                                                                                  | Fish acceptance and temp. Data control sheet |

NAME OF SHIPPER Mercy Perch DATE 07-07-2020  
 FLIGHT NO. ABD APT OF DEST. LGG

| VEHICLE REG NO. | ARRIVAL TIME | ULD LOADED | NO OF PIECES | QTY RECEIVED FOR EXPORT | NO OF BOXES SAMPLED | TEMPERATURE RANGE RECORDED AT DELIVERY | BATCH NO/ EXPIRY DATE | CONSIGNEE | REMARKS     |
|-----------------|--------------|------------|--------------|-------------------------|---------------------|----------------------------------------|-----------------------|-----------|-------------|
| UAS<br>629Z     | 10:08h       | pic 0104H  | 863          | 3519                    | 10                  | -1.3 - -1.8                            | 21-07-20              | Fiorital  | temp.<br>OK |
|                 |              |            |              |                         |                     |                                        |                       |           |             |
|                 |              |            |              |                         |                     |                                        |                       |           |             |
|                 |              |            |              |                         |                     |                                        |                       |           |             |
|                 |              |            |              |                         |                     |                                        |                       |           |             |
|                 |              |            |              |                         |                     |                                        |                       |           |             |
|                 |              |            |              |                         |                     |                                        |                       |           |             |

I DECLARE THAT THE INFORMATION ABOVE IS CORRECT AND TRUE TO THE BEST OF MY KNOWLEDGE

SHIPPER'S NAME ADY FRANCO QUALITY CONTROLLER DETALA JPH  
 SIGNATURE [Signature] SIGNATURE [Signature]  
 DATE 07/07/2020 DATE 07-07-2020

|                      |                 |                                |                    |                                     |
|----------------------|-----------------|--------------------------------|--------------------|-------------------------------------|
| Ref. No.:<br>NCGO-04 | Page:<br>1 of 1 | Issue No.:<br>Date: 12.03.2018 | Rev. No.:<br>Date: | Effective Date:<br>Date: 12.03.2018 |
|----------------------|-----------------|--------------------------------|--------------------|-------------------------------------|

# Temperature checks at Fiorital (Italy)

DATA: 10/07/2020

PRELEVATORE: CLAUDIA CATANZARO

| STORAGE AGENT LOT | CO LO RE | TAGL IA     | REF. NUMBER       | BATCH            | N. INTERNO     | DATA SPED. | DATA SCAD. | AQ       | T°C  | COMM. |
|-------------------|----------|-------------|-------------------|------------------|----------------|------------|------------|----------|------|-------|
| B2836E            |          | 300<br>700  | 242-1066<br>0930  | 189              | NAP16<br>55920 | 189        | 22/07      | 20010915 | -15  | 6078  |
| B2839S            |          | 300<br>500  | 242-1066-<br>0930 | C-2820-<br>01655 | /              | 189        | 21/07      | 20010913 | -10  | 6076  |
| B2831B            |          | 500<br>1000 | 242-1066-<br>0930 | 189              | /              | 188        | 21/07      | 20010914 | -1,1 | 6077  |
|                   |          |             |                   |                  |                |            |            |          |      |       |
|                   |          |             |                   |                  |                |            |            |          |      |       |
|                   |          |             |                   |                  |                |            |            |          |      |       |
|                   |          |             |                   |                  |                |            |            |          |      |       |
|                   |          |             |                   |                  |                |            |            |          |      |       |
|                   |          |             |                   |                  |                |            |            |          |      |       |
|                   |          |             |                   |                  |                |            |            |          |      |       |

**Fiorital S.p.A.**  
 con **Socid Unico**  
 Loc. Marittima Fabbriato 114  
 30135 Venezia



Label of the product

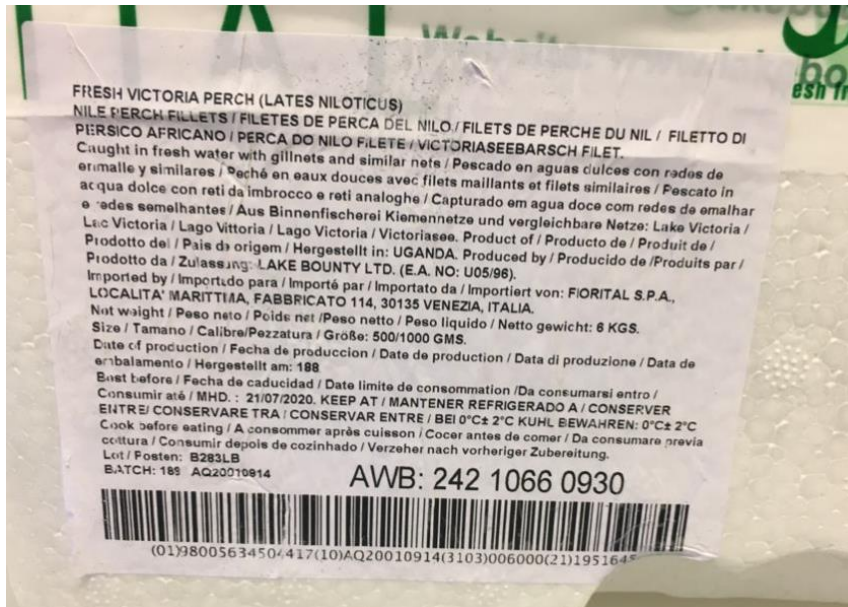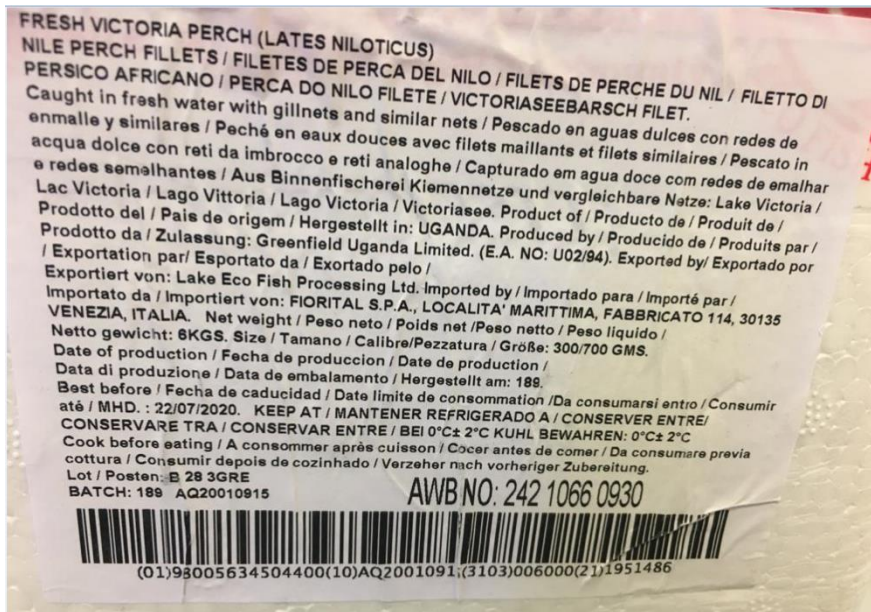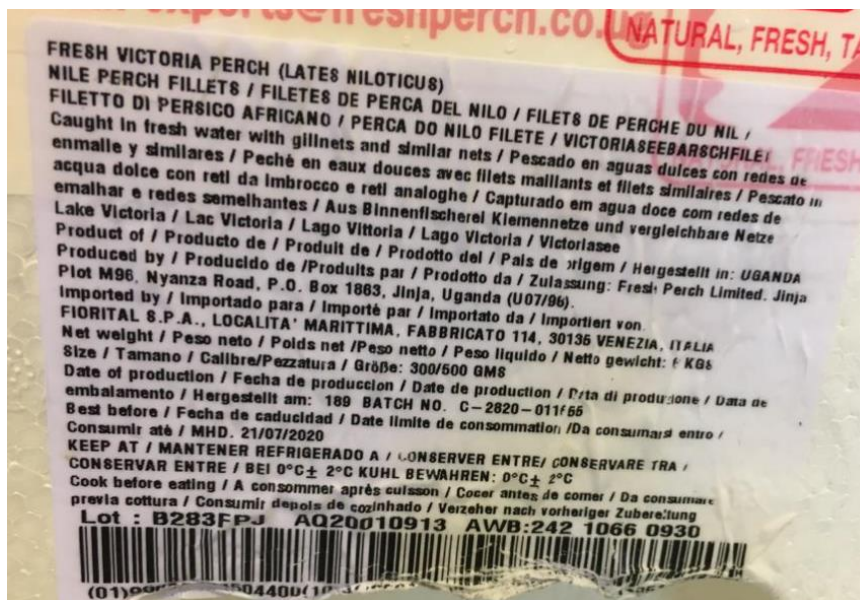

# Truck temperature from Liege airport to Fiorital

ALBERTON

ID VEICOLO  
MODELLO DL  
DL\_SERIAL N:  
15/07/2020

M0881FT  
TOUCHPRINT  
0716020659  
°C

11: DAVANTI 12: DIETRO

| 08/07/2020 | 11   | 12   | 13 | 14 | 15 | 16 |
|------------|------|------|----|----|----|----|
| 00:11      | 16.0 | 16.2 |    |    |    |    |
| 00:26      | 16.1 | 16.2 |    |    |    |    |
| 00:41      | 16.1 | 16.2 |    |    |    |    |
| 00:56      | 16.1 | 16.2 |    |    |    |    |
| 01:11      | 16.1 | 16.2 |    |    |    |    |
| 01:26      | 16.1 | 16.2 |    |    |    |    |
| 01:41      | 16.1 | 16.2 |    |    |    |    |
| 01:56      | 16.1 | 16.3 |    |    |    |    |
| 02:11      | 16.2 | 16.3 |    |    |    |    |
| 02:26      | 16.2 | 16.4 |    |    |    |    |
| 02:41      | 16.3 | 16.4 |    |    |    |    |
| 02:56      | 16.3 | 16.5 |    |    |    |    |
| 03:11      | 16.4 | 16.5 |    |    |    |    |
| 03:26      | 16.3 | 16.5 |    |    |    |    |
| 03:41      | 16.3 | 16.4 |    |    |    |    |
| 03:56      | 16.2 | 16.4 |    |    |    |    |
| 04:11      | 16.2 | 16.3 |    |    |    |    |
| 04:26      | 16.1 | 16.2 |    |    |    |    |
| 04:41      | 15.1 | 16.2 |    |    |    |    |
| 04:56      | 16.0 | 16.2 |    |    |    |    |
| 05:11      | 16.0 | 16.1 |    |    |    |    |
| 05:26      | 16.0 | 16.1 |    |    |    |    |
| 05:41      | 15.9 | 16.1 |    |    |    |    |
| 05:56      | 15.9 | 16.0 |    |    |    |    |
| 06:11      | 15.8 | 16.0 |    |    |    |    |
| 06:26      | 15.8 | 16.0 |    |    |    |    |
| 06:41      | 15.8 | 15.9 |    |    |    |    |
| 06:56      | 15.7 | 15.9 |    |    |    |    |
| 07:11      | 15.7 | 15.9 |    |    |    |    |
| 07:26      | 15.7 | 15.8 |    |    |    |    |
| 07:41      | 15.7 | 15.8 |    |    |    |    |
| 07:56      | 15.7 | 15.8 |    |    |    |    |
| 08:11      | 15.7 | 15.8 |    |    |    |    |
| 08:26      | 15.7 | 15.8 |    |    |    |    |
| 08:41      | 15.6 | 15.8 |    |    |    |    |
| 08:56      | 15.6 | 15.7 |    |    |    |    |
| 09:11      | 15.6 | 15.7 |    |    |    |    |
| 09:26      | 15.6 | 15.7 |    |    |    |    |
| 09:41      | 15.6 | 15.7 |    |    |    |    |
| 09:56      | 15.6 | 15.7 |    |    |    |    |
| 10:11      | 15.5 | 15.7 |    |    |    |    |
| 10:26      | 15.6 | 15.7 |    |    |    |    |
| 10:41      | 15.3 | 15.6 |    |    |    |    |
| 10:56      | 15.6 | 15.7 |    |    |    |    |
| 11:11      | 15.5 | 15.7 |    |    |    |    |
| 11:26      | 15.3 | 15.5 |    |    |    |    |
| 11:41      | 15.3 | 15.5 |    |    |    |    |
| 11:56      | 15.3 | 15.5 |    |    |    |    |
| 12:11      | 15.5 | 15.6 |    |    |    |    |
| 12:26      | 15.3 | 15.5 |    |    |    |    |
| 12:41      | 15.3 | 15.5 |    |    |    |    |
| 12:56      | 15.3 | 15.5 |    |    |    |    |
| 13:11      | 15.4 | 15.5 |    |    |    |    |
| 13:26      | 15.4 | 15.6 |    |    |    |    |
| 13:41      | 15.5 | 15.6 |    |    |    |    |
| 13:56      | 15.5 | 15.7 |    |    |    |    |
| 14:11      | 15.6 | 15.7 |    |    |    |    |
| 14:26      | 15.6 | 15.7 |    |    |    |    |
| 14:41      | 15.6 | 15.8 |    |    |    |    |
| 14:56      | 15.7 | 15.8 |    |    |    |    |
| 15:11      | 15.7 | 15.9 |    |    |    |    |
| 15:26      | 15.8 | 15.9 |    |    |    |    |
| 15:41      | 15.8 | 16.0 |    |    |    |    |
| 15:56      | 15.8 | 16.0 |    |    |    |    |
| 16:11      | 15.9 | 16.0 |    |    |    |    |
| 16:26      | 16.0 | 16.1 |    |    |    |    |
| 16:41      | 16.0 | 16.1 |    |    |    |    |
| 16:56      | 16.1 | 16.2 |    |    |    |    |
| 17:11      | 16.1 | 16.2 |    |    |    |    |
| 17:26      | 16.1 | 16.3 |    |    |    |    |
| 17:41      | 16.2 | 16.3 |    |    |    |    |
| 17:56      | 16.2 | 16.3 |    |    |    |    |
| 18:11      | 15.4 | 15.6 |    |    |    |    |
| 18:26      | 13.6 | 13.7 |    |    |    |    |
| 18:41      | 2.5  | 2.5  |    |    |    |    |
| 18:56      | 1.8  | 1.8  |    |    |    |    |
| 19:11      | 4.1  | 4.2  |    |    |    |    |
| 19:26      | 3.2  | 3.3  |    |    |    |    |
| 19:41      | 1.7  | 1.8  |    |    |    |    |
| 19:56      | 1.9  | 2.0  |    |    |    |    |
| 20:11      | 2.0  | 2.1  |    |    |    |    |
| 20:26      | 1.8  | 1.9  |    |    |    |    |
| 20:41      | 1.6  | 1.6  |    |    |    |    |
| 20:56      | 2.2  | 2.2  |    |    |    |    |
| 21:11      | 1.2  | 1.3  |    |    |    |    |
| 21:26      | 1.8  | 1.8  |    |    |    |    |
| 21:41      | 1.4  | 1.4  |    |    |    |    |
| 21:56      | 1.7  | 1.5  |    |    |    |    |
| 22:11      | 1.9  | 2.0  |    |    |    |    |
| 22:26      | 1.0  | 1.0  |    |    |    |    |
| 22:41      | -0.2 | -0.2 |    |    |    |    |
| 22:56      | 1.6  | 1.3  |    |    |    |    |
| 23:11      | 2.1  | 2.1  |    |    |    |    |
| 23:26      | 1.9  | 2.0  |    |    |    |    |
| 23:41      | 1.7  | 1.4  |    |    |    |    |
| 23:56      | 2.0  | 2.0  |    |    |    |    |

08.07.20

ALBERTON

ID VEICOLO  
MODELLO DL  
DL\_SERIAL N:  
15/07/2020

M0881FT  
TOUCHPRINT  
0716020659  
°C

11: DAVANTI 12: DIETRO

| 09/07/2020 | 11   | 12   | 13 | 14 | 15 | 16 |
|------------|------|------|----|----|----|----|
| 00:11      | -0.5 | -0.6 |    |    |    |    |
| 00:26      | -0.1 | 0.0  |    |    |    |    |
| 00:41      | 1.8  | 1.6  |    |    |    |    |
| 00:56      | 1.5  | 1.5  |    |    |    |    |
| 01:11      | -1.1 | -1.1 |    |    |    |    |
| 01:26      | 2.2  | 2.1  |    |    |    |    |
| 01:41      | 1.8  | 1.8  |    |    |    |    |
| 01:56      | 2.9  | 2.8  |    |    |    |    |
| 02:11      | 1.7  | 1.7  |    |    |    |    |
| 02:26      | 1.4  | 1.3  |    |    |    |    |
| 02:41      | 0.4  | 0.5  |    |    |    |    |
| 02:56      | 1.8  | 1.9  |    |    |    |    |
| 03:11      | 1.1  | 1.1  |    |    |    |    |
| 03:26      | 1.6  | 1.7  |    |    |    |    |
| 03:41      | 0.2  | 0.3  |    |    |    |    |
| 03:56      | -0.2 | -0.2 |    |    |    |    |
| 04:11      | 1.1  | 1.1  |    |    |    |    |
| 04:26      | 1.8  | 1.5  |    |    |    |    |
| 04:41      | 1.7  | 1.7  |    |    |    |    |
| 04:56      | -0.5 | -0.5 |    |    |    |    |
| 05:11      | 0.6  | 0.6  |    |    |    |    |
| 05:26      | 1.7  | 1.7  |    |    |    |    |
| 05:41      | 2.2  | 2.1  |    |    |    |    |
| 05:56      | 1.7  | 1.7  |    |    |    |    |
| 06:11      | 1.4  | 1.1  |    |    |    |    |
| 06:26      | 1.7  | 1.7  |    |    |    |    |
| 06:41      | 1.8  | 1.8  |    |    |    |    |
| 06:56      | 1.3  | 1.3  |    |    |    |    |
| 07:11      | 0.4  | 0.3  |    |    |    |    |
| 07:26      | 2.1  | 1.8  |    |    |    |    |
| 07:41      | 2.1  | 2.1  |    |    |    |    |
| 07:56      | 0.0  | -0.1 |    |    |    |    |
| 08:11      | 2.0  | 1.9  |    |    |    |    |
| 08:26      | 2.5  | 2.5  |    |    |    |    |
| 08:41      | 1.2  | 1.3  |    |    |    |    |
| 08:56      | 1.7  | 1.7  |    |    |    |    |
| 09:11      | -0.5 | -0.5 |    |    |    |    |
| 09:26      | 2.2  | 2.3  |    |    |    |    |
| 09:41      | 2.9  | 2.8  |    |    |    |    |
| 09:56      | 3.1  | 3.2  |    |    |    |    |
| 10:11      | 2.3  | 2.3  |    |    |    |    |
| 10:26      | 3.0  | 3.0  |    |    |    |    |
| 10:41      | 2.2  | 2.1  |    |    |    |    |
| 10:56      | 5.0  | 5.0  |    |    |    |    |
| 11:11      | 6.1  | 6.2  |    |    |    |    |
| 11:26      | 13.0 | 13.4 |    |    |    |    |
| 11:41      | 15.6 | 16.1 |    |    |    |    |
| 11:56      | 14.2 | 14.6 |    |    |    |    |
| 12:11      | 14.4 | 14.7 |    |    |    |    |
| 12:26      | 14.5 | 14.8 |    |    |    |    |
| 12:41      | 14.8 | 15.2 |    |    |    |    |
| 12:56      | 15.6 | 15.8 |    |    |    |    |
| 13:11      | 16.1 | 16.4 |    |    |    |    |
| 13:26      | 16.6 | 17.0 |    |    |    |    |
| 13:41      | 20.1 | 20.5 |    |    |    |    |
| 13:56      | 22.1 | 23.3 |    |    |    |    |
| 14:11      | 23.6 | 23.8 |    |    |    |    |
| 14:26      | 24.4 | 24.7 |    |    |    |    |
| 14:41      | 24.9 | 25.2 |    |    |    |    |
| 14:56      | 25.5 | 25.8 |    |    |    |    |
| 15:11      | 26.1 | 26.3 |    |    |    |    |
| 15:26      | 26.6 | 27.0 |    |    |    |    |
| 15:41      | 27.1 | 27.5 |    |    |    |    |
| 15:56      | 27.3 | 27.6 |    |    |    |    |
| 16:11      | 27.6 | 27.8 |    |    |    |    |
| 16:26      | 28.0 | 28.2 |    |    |    |    |
| 16:41      | 27.7 | 27.9 |    |    |    |    |
| 16:56      | 27.8 | 28.1 |    |    |    |    |
| 17:11      | 27.8 | 28.1 |    |    |    |    |
| 17:26      | 28.1 | 28.3 |    |    |    |    |
| 17:41      | 28.2 | 28.5 |    |    |    |    |
| 17:56      | 28.4 | 28.6 |    |    |    |    |
| 18:11      | 28.4 | 28.6 |    |    |    |    |
| 18:26      | 28.5 | 28.7 |    |    |    |    |
| 18:41      | 28.5 | 28.7 |    |    |    |    |
| 18:56      | 28.5 | 28.7 |    |    |    |    |
| 19:11      | 28.6 | 28.8 |    |    |    |    |
| 19:26      | 28.6 | 28.7 |    |    |    |    |
| 19:41      | 28.2 | 28.5 |    |    |    |    |
| 19:56      | 28.5 | 28.6 |    |    |    |    |
| 20:11      | 28.3 | 28.5 |    |    |    |    |
| 20:26      | 28.5 | 28.6 |    |    |    |    |
| 20:41      | 28.0 | 28.1 |    |    |    |    |
| 20:56      | 27.1 | 27.3 |    |    |    |    |
| 21:11      | 26.5 | 26.6 |    |    |    |    |
| 21:26      | 26.0 | 26.2 |    |    |    |    |
| 21:41      | 25.5 | 25.6 |    |    |    |    |
| 21:56      | 25.1 | 25.2 |    |    |    |    |
| 22:11      | 24.9 | 25.1 |    |    |    |    |
| 22:26      | 24.4 | 24.6 |    |    |    |    |
| 22:41      | 24.2 | 24.3 |    |    |    |    |
| 22:56      | 24.1 | 24.2 |    |    |    |    |
| 23:11      | 23.8 | 24.0 |    |    |    |    |
| 23:26      | 23.5 | 23.6 |    |    |    |    |
| 23:41      | 23.3 | 23.5 |    |    |    |    |
| 23:56      | 22.7 | 22.9 |    |    |    |    |

09.07.20

## Part III

# Dataloggers

East African Sea Food Ltd.- Kenya

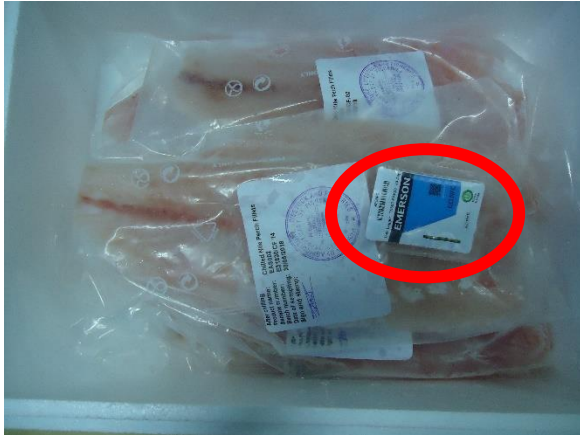

Logger above product (no probe)

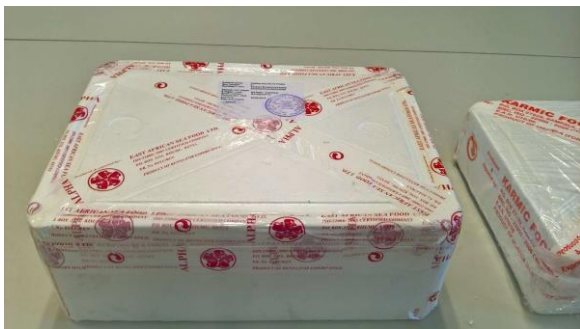

Seven sample fillets in 6kg box (instead 3 kg box)

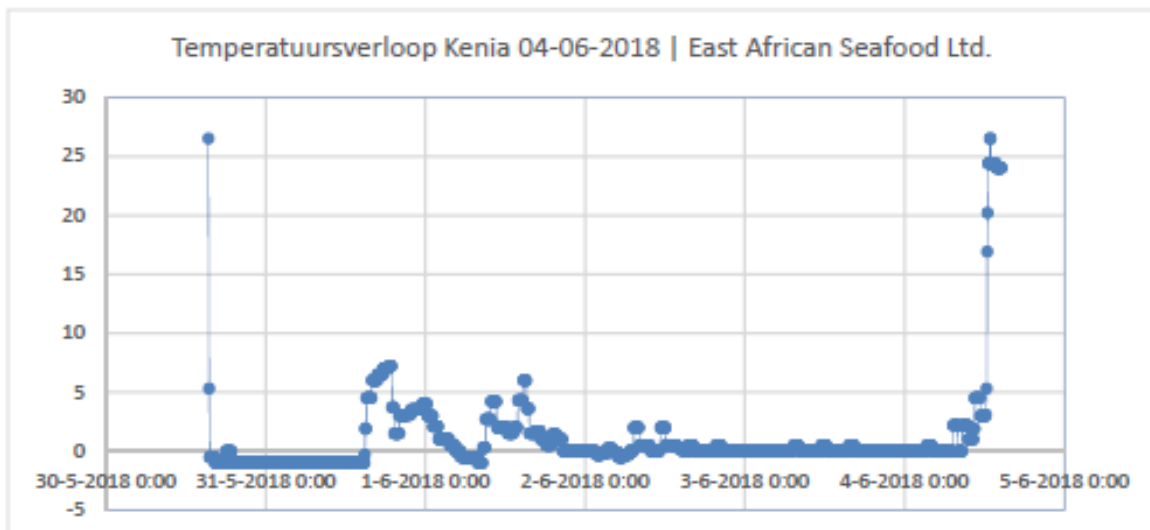

Measured temperature logger

Core temperature product at destination +0.5 degrees (mentioned in report reason for this). See explanation above in pictures.

**The use of a too big box could explain the showed pattern of the logger.**

Dutch Fish Importers Association the Netherlands, 16-07-2020

Karmic Food Ltd. – Uganda

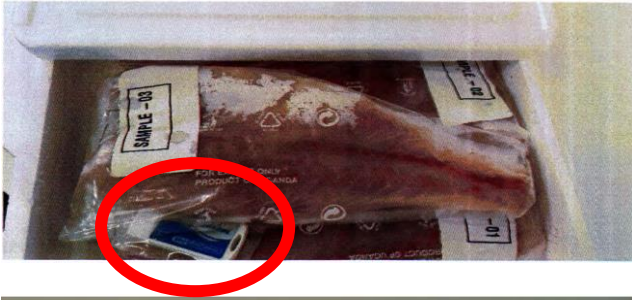

Logger between product

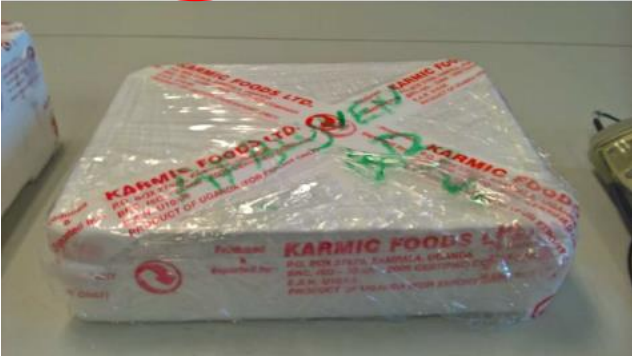

Seven samples in 3 kg box

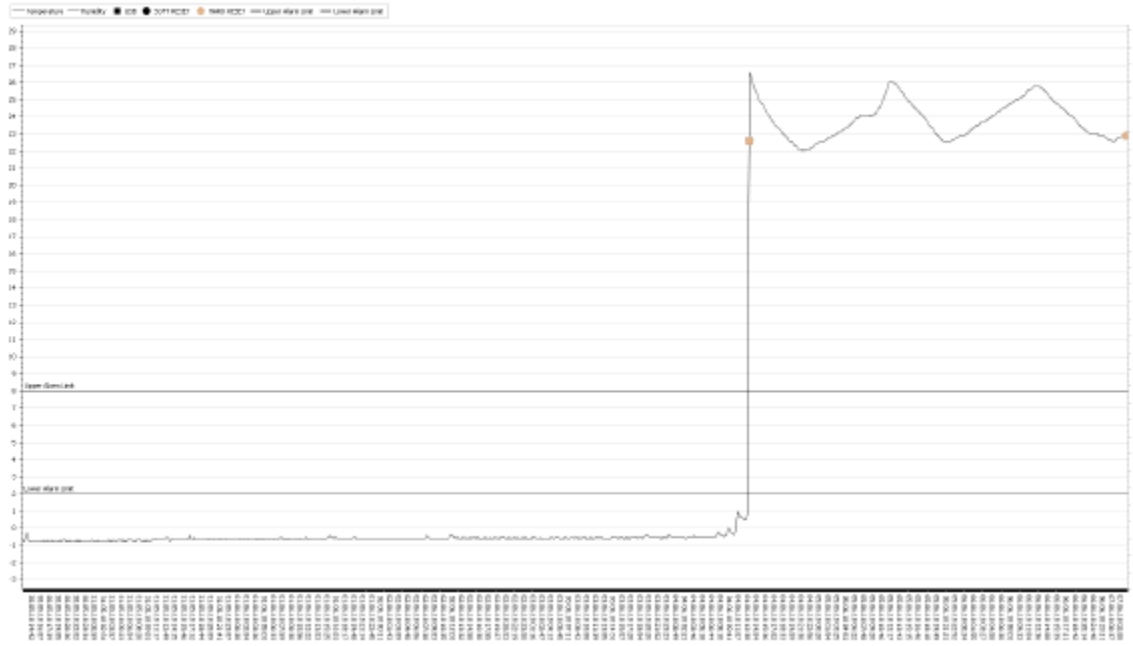

Measured temperature logger

Core temperature product at destination -0.5 degrees

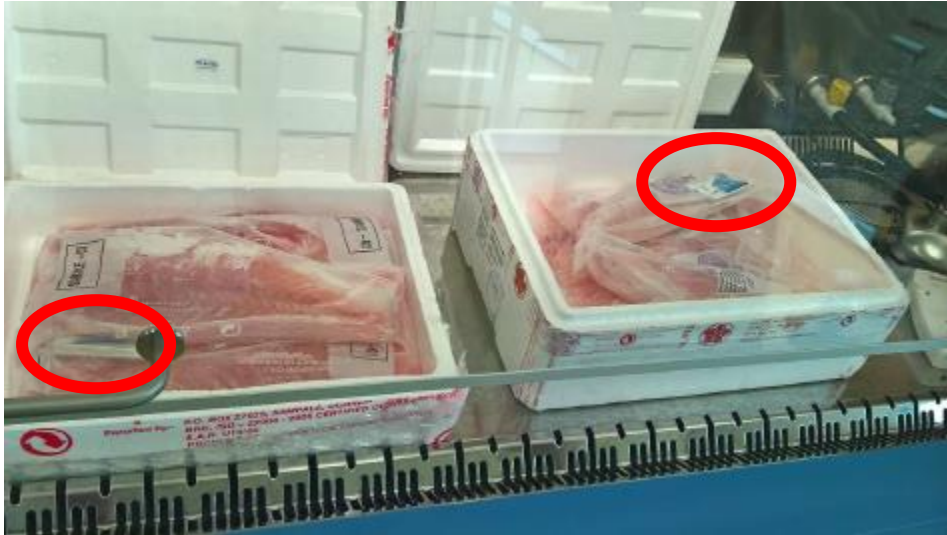

Comparison box Karmic Food Ltd. 3 kg (left) and East African Seafood Ltd. 6kg box (right)

Differences:

- East African Seafood Ltd. 6kg box (right):
  - o Bigger box (6 kg)
  - o Logger on top of products
  - o Core temperature product +0.5 degrees (mentioned in report reason for this)

Supreme perch:

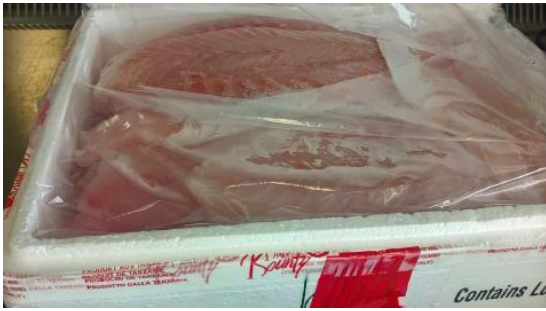

Seven samples in 3 kg box

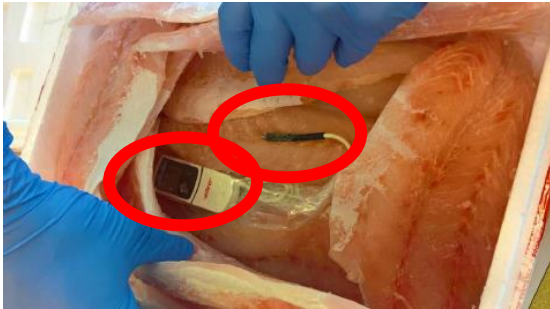

Transport logger in core fillet

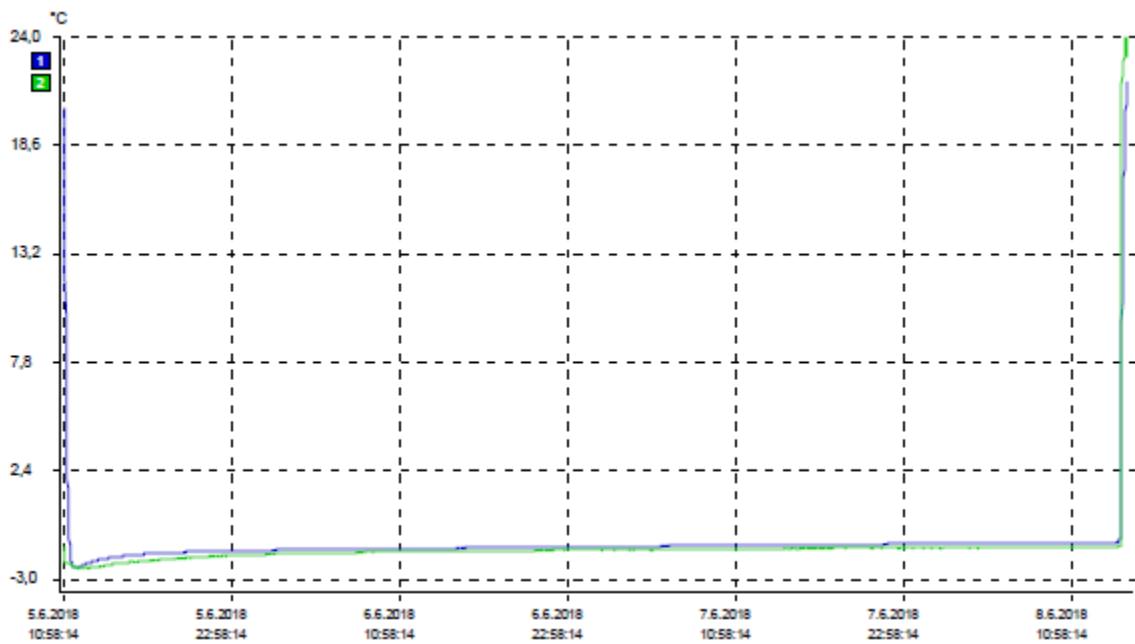

Measured temperature logger

(blue line is logger temperature – green line is probe temperature)

Core temperature at destination -1.6 degrees

Fresh Perch Ltd. (Uganda)

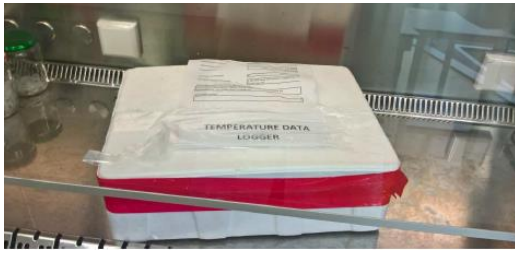

Seven samples in 6 kg box (instead 3 kg box)

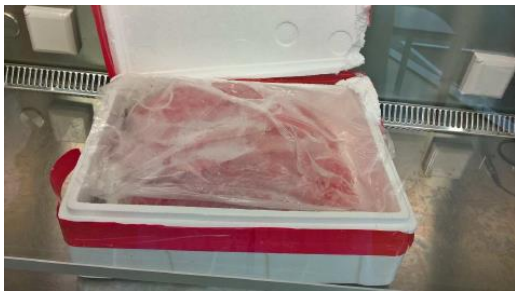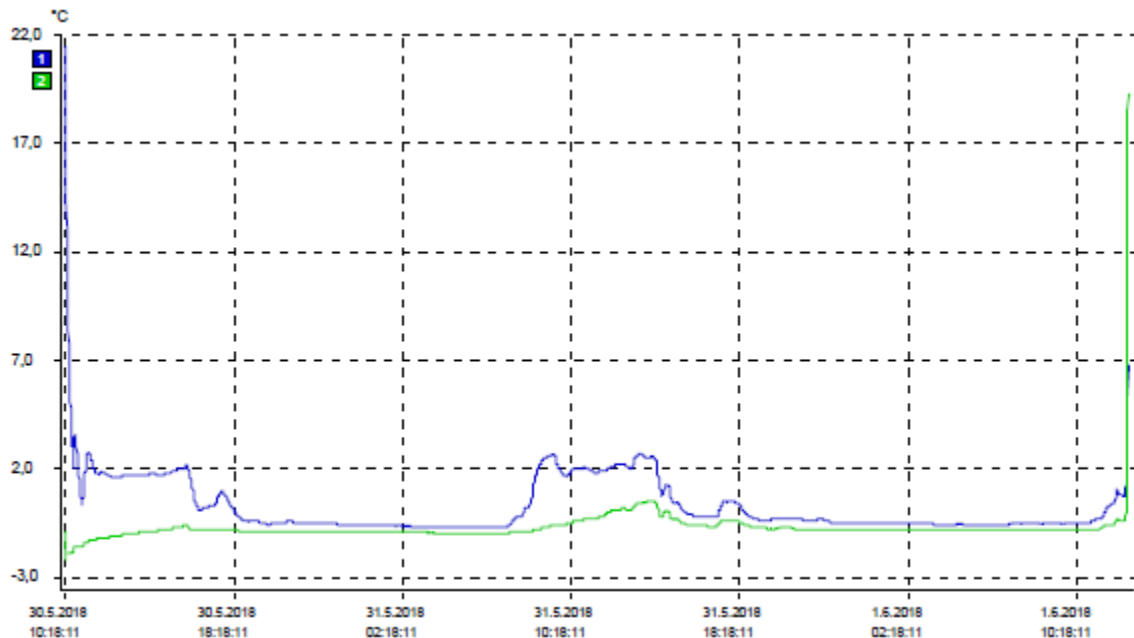

Measured temperature logger

(blue line is logger temperature – green line is probe temperature)

Core temperature at destination -0.8 degrees

**Comment received from RIKILT Wageningen UR: The probe attached to the logger was loose in the box (1-6-2018). I can forward the communication if needed.**

**Both, the use of a too big box and the comment from RIKILT Wageningen UR could explain the showed pattern of the logger.**



## Part IV

# Temperatures coldstore and transport

To validate the influence of the ambient temperature (set and real temperatures of the transport and storage, including loading and unloading) on the temperature of the Superchilled products, dataloggers were placed inside a Nile perch box (figure 1) and outside a Nile perch box (figure 2) during a recent regular consignment (see picture 1 below). The homgenised temperature of the transported superchilled Nile perch fillets in this consignment was  $-1.4\text{ }^{\circ}\text{C}$  at departure factory.

## Device Information

|                              |                              |                                      |
|------------------------------|------------------------------|--------------------------------------|
| Serial Number: S118050094-18 | Log Interval: 00H 10M 00S    | Temperature Type: $^{\circ}\text{C}$ |
| Model Number: S1C10A01000    | Start Mode: Start by Button  |                                      |
| Version: V2.1                | Start Delay: 00D 00H 00M 00S |                                      |

## Trip Information

Internal ID: 0000001  
Description: Temperature recording.

## Logging Summary

|                                                     |                             |                                |
|-----------------------------------------------------|-----------------------------|--------------------------------|
| Highest Temperature: $23.1\text{ }^{\circ}\text{C}$ | Record Mode: Stop when full | Start Time: 10-Jul-20 11:14:19 |
| Lowest Temperature: $-1.3\text{ }^{\circ}\text{C}$  | Stop Mode: Stop by Button   | Stop Time: 15-Jul-20 14:04:19  |
| Average Temperature: $-0.5\text{ }^{\circ}\text{C}$ | Data Points: 738            | Elapsed Time: 05D 02H 50M 00S  |
| MKT: $-0.4\text{ }^{\circ}\text{C}$                 | Alarm At: N/A               |                                |

## Marked Events

NA

## Temperature[ $^{\circ}\text{C}$ ]

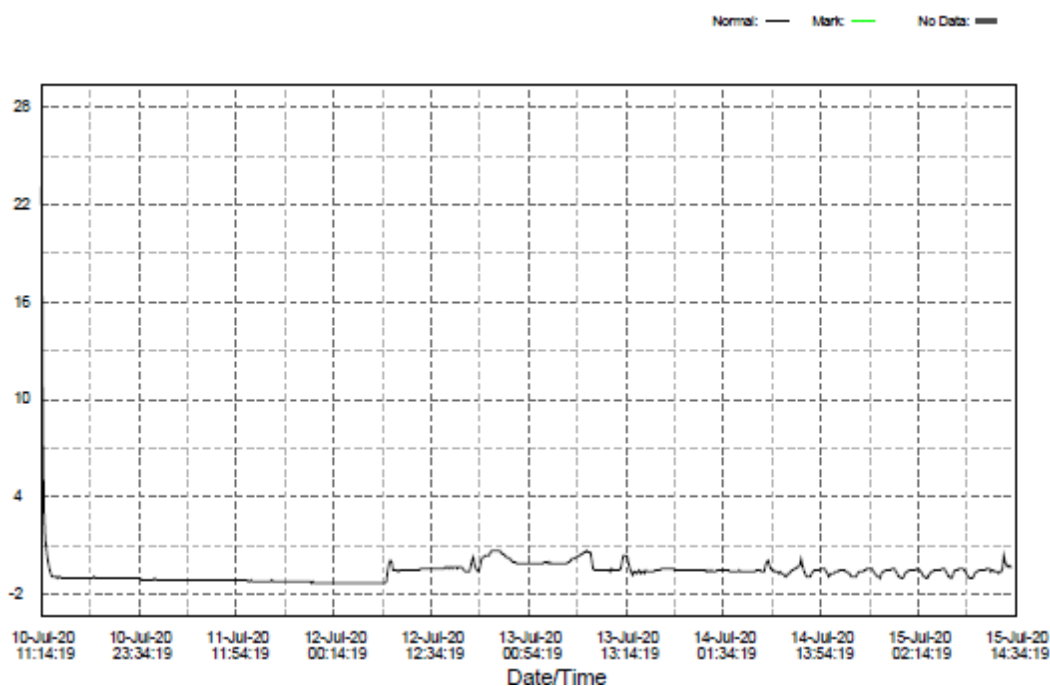

Figure 1: datalogger temperature inside box Nile perch value Chain (10-15 July 2020). Full data about the inside box temperature is available via this [link](#).

### Device Information

|                              |                              |                      |
|------------------------------|------------------------------|----------------------|
| Serial Number: S118050094-17 | Log Interval: 00H 10M 00S    | Temperature Type: °C |
| Model Number: S1C10A01000    | Start Mode: Start by Button  |                      |
| Version: V2.1                | Start Delay: 00D 00H 00M 00S |                      |

### Trip Information

Internal ID: 0000001  
Description: Temperature recording.

### Logging Summary

|                              |                             |                                |
|------------------------------|-----------------------------|--------------------------------|
| Highest Temperature: 23.1 °C | Record Mode: Stop when full | Start Time: 10-Jul-20 10:56:06 |
| Lowest Temperature: -5.8 °C  | Stop Mode: Stop by Button   | Stop Time: 15-Jul-20 13:36:06  |
| Average Temperature: 1.4 °C  | Data Points: 737            | Elapsed Time: 05D 02H 40M 00S  |
| MKT: 4.7 °C                  | Alarm At: N/A               |                                |

### Marked Events

N/A

### Temperature[°C]

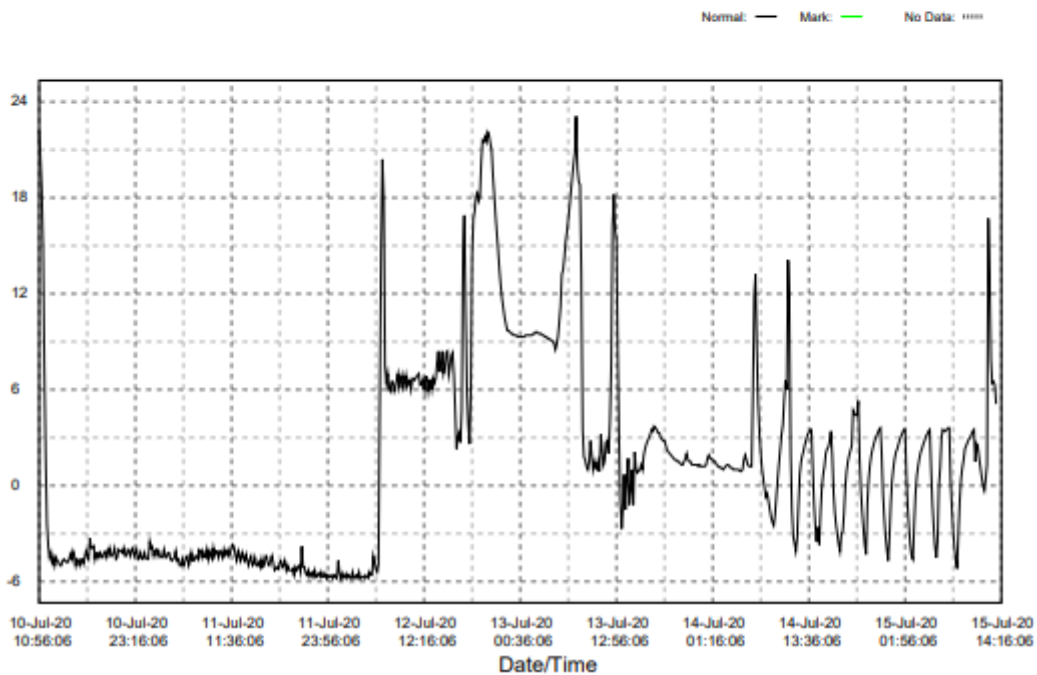

Figure 2: datalogger ambient temperature (outside the box) Nile perch value Chain (10-15 July 2020). Full data about the ambient temperature is available via this [link](#).

In figure 3 the different steps in the Nile perch value chain are pointed. Below this figure we describe the different steps in this value chain.

Temperature[°C]

Normal: — Mark: — No Data: ----

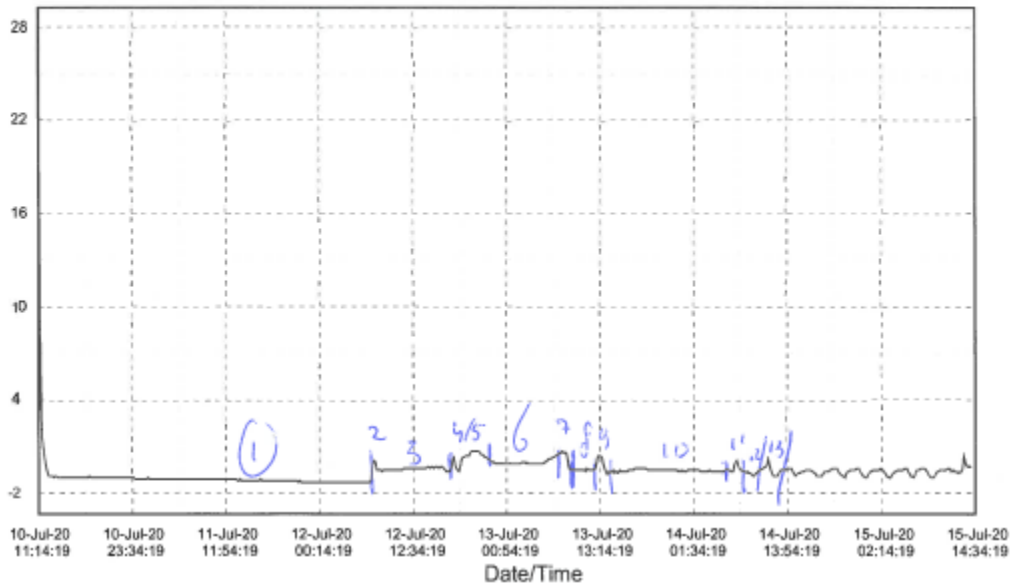

Temperature[°C]

Normal: — Mark: — No Data: ----

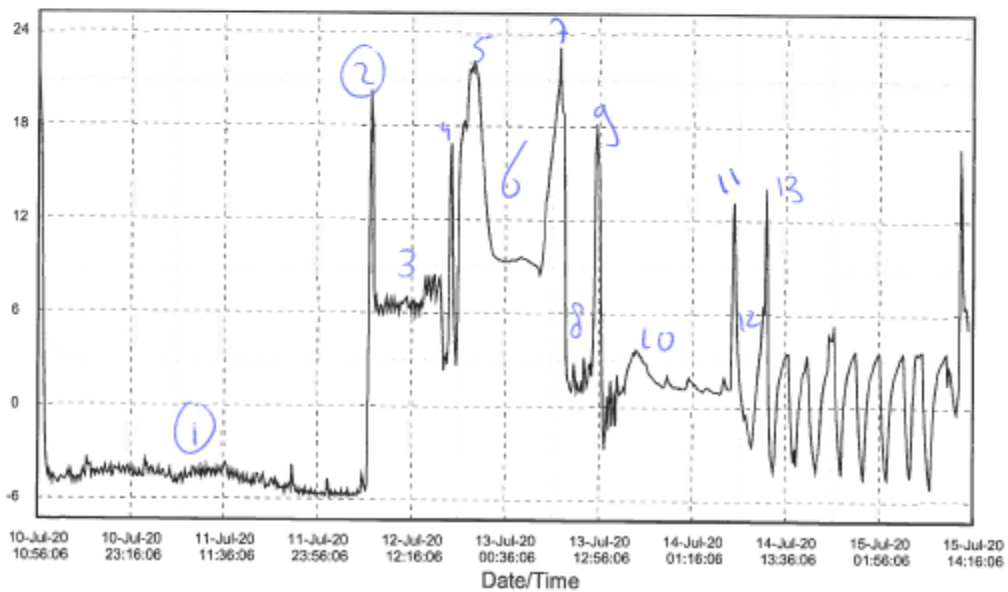

www.tempmate.com

1/3

Figure 3: Steps in the Fresh superchilled Nile Perch value chain transport and storage from leaving the factory at origin.

#### Steps in the Fresh superchilled Nile Perch value chain

1. 10/7/2020 (11:30) – 12/7/2020 (06:30): Road transport from the factory to the airport. The trucks temperature varies between -3.8 and -5.8 °C Celsius. During that period the inside temperature is stable around -1 degree Celsius.

2. 12/7/2020 (06:30) - 12/7/2020 (07:15): Unloading at the airport. During a period of roughly 45 minutes the ambient temperature increases to maximum 20.4 °C Celsius  
During that same period the inside temperature also increases, to maximum 0.0 °C
3. 12/7/2020 (07:15) - 12/7/2020 (17:15) Storage in the coldstore at the airport, during this period the ambient temperature is app 6/7 °C. Inside temperature is around -0.4 °C
4. 12/7/2020 (17:15) - 12/7/2020 (17:45): Transport from coldstore to the plane, ambient temperature rises to maximum 16.9 °C, inside temperature rises to 0.3 °C
5. 12/7/2020 (18:15) - 12/7/2020 (22:30): Reopening of the plane, most likely for loading additional other goods, ambient temperature rises to maximum 22 °C, inside temperature rises to 0.7 °C
6. 12/7/2020 (22:30) – 13/7/2020 (06:00): Air transport, ambient temperature is around 9 °C, with an inside temperature around 0 °C
7. 13/7/2020 (06:00) - 13/7/2020 (08:30): Plane unloading at Amsterdam airport, ambient temperature rises to 23.1, with an inside temperature of 0.7 °C
8. 13/7/2020 (08:30) - 13/7/2020 (12:15): Storage in the coldstore of Malenstein, ambient temperature around 2 °C, inside temperature 0.5 °C
9. 13/7/2020 (12:15) - 13/7/2020 (13:00): Loading with forwarding agents from Amsterdam airport, ambient temperature rises to maximum 18.2 °C, inside temperature rises to 0.4°C
10. 13/7/2020 (13:00) – 14/7/2020 (06:30): Road transport in the Netherlands, ambient temperature is between 0 and 4 °C, inside temperature -0.5 °C
11. 14/7/2020 (06:30) - 14/7/2020 (07:00): Unloading at Claresse visverwerking, ambient temperature rises to maximum 13.2 °C, inside temperature rises to 0 °C
12. 14/7/2020 (07:00) - 14/7/2020 (10:45):: Storage in the coldstore of claresse visverwerking, ambient temperature is between -2 and 4 °C, inside temperature -0.5 to -1 °C
13. 14/7/2020 (10:45) - 14/7/2020 (11:00): Pick up by Anova employee, ambient temperature rises to 14.1 °C

#### Conclusion:

Figure 1 shows a constant temperature inside the box in the supply chain between the factory at origin and arrival at customer (EU). The ambient temperature (fluctuation at loading and unloading; figure 2) has no significant influence on this temperature in the box.

Appendix 1: position loggers box in regular supply chain

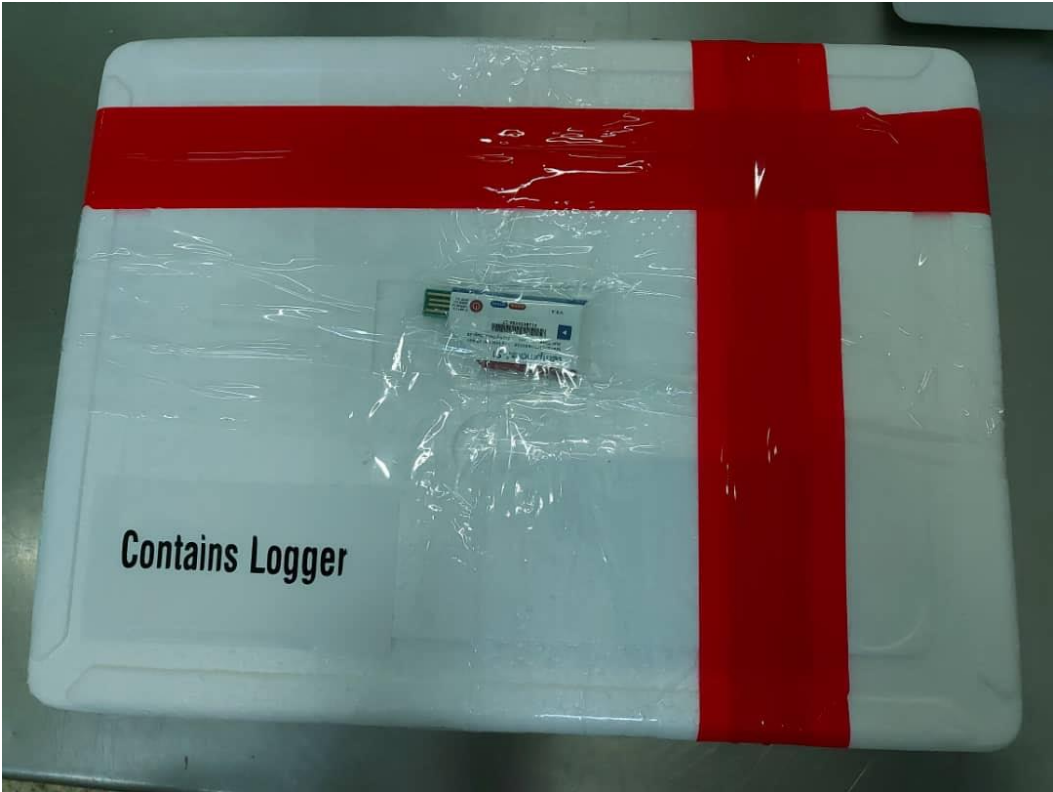

Position logger outside box (ambient temperature)

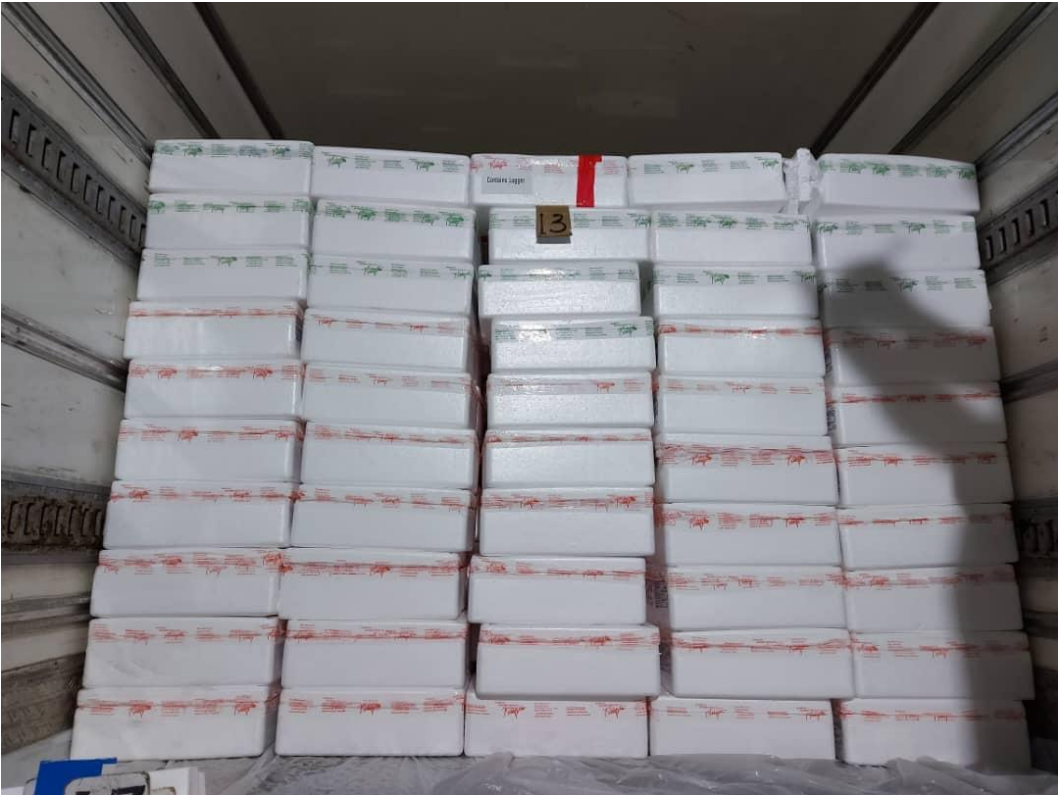

Appendix 2: Pictures at Claesse Visverwerking (Destination EU)

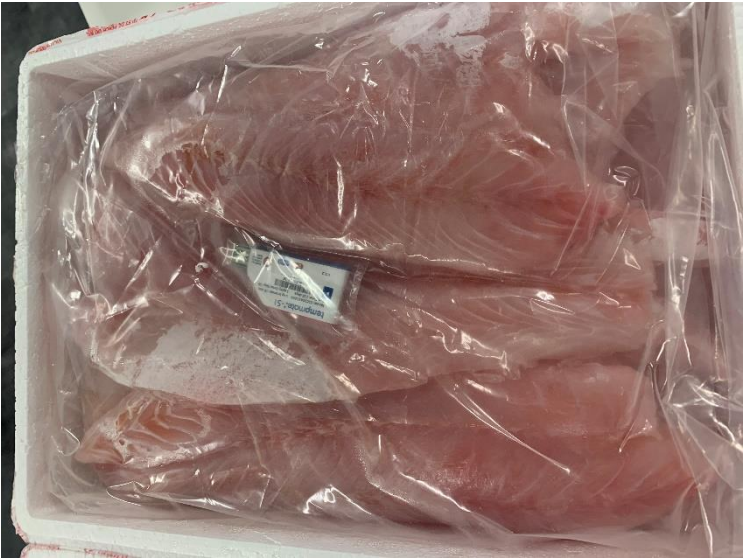

Box with inside logger

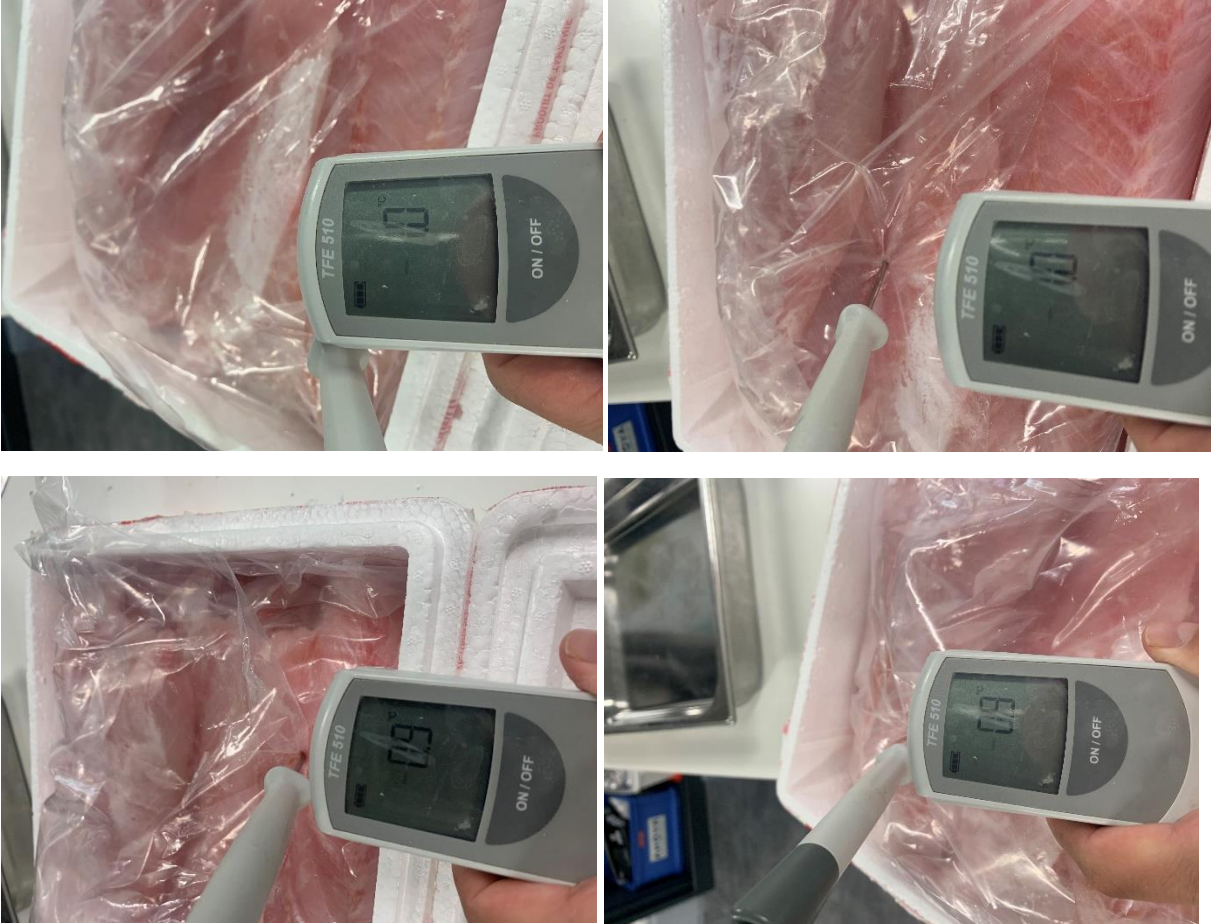

Temperature measurement product at different positions in the box
